# Supplementary material for: Schiff Base Ancillary Ligands in Bis(diimine) Copper(I) Dye-Sensitized Solar Cells
Source: Int J Mol Sci. 2020 Mar 3;21(5):1735. doi: 10.3390/ijms21051735 (PMC7084427; doi:10.3390/ijms21051735)
Supplement: Supplementary file 1 [file ijms-21-01735-s001.zip]

Archive with 7 entries (6 files):
- checkcif.pdf
- __MACOSX/
- __MACOSX/._checkcif.pdf
- PFPHcomplex_130K_0m.cif
- __MACOSX/._PFPHcomplex_130K_0m.cif
- Supporting information 21Feb 2020.docx
- __MACOSX/._Supporting information 21Feb 2020.docx
