# Supplementary material for: Schiff Base Ancillary Ligands in Bis(diimine) Copper(I) Dye-Sensitized Solar Cells
Source: Int J Mol Sci. 2020 Mar 3;21(5):1735. doi: 10.3390/ijms21051735 (PMC7084427; doi:10.3390/ijms21051735)
Supplement: Supplementary file 1 [file ijms-21-01735-s001.zip › PFPHcomplex_130K_0m.cif]

data_pfphcomplex_130k_0m
_audit_creation_date               2020-01-30
_audit_creation_method
;
Olex2 1.2
(compiled May 18 2018 14:05:52 for OlexSys, GUI svn.r5506)
;
_shelx_SHELXL_version_number       '2018/3'
loop_
  _audit_author_name
  _audit_author_email
  _audit_author_address
 'Prescimone, A.' alessandro.prescimone@unibas.ch
;

University of Basel
Department of Chemistry
Basel
Switzerland
;

_audit_contact_author_address
;
University of Basel
Department of Chemistry
Basel
Switzerland
;
_audit_contact_author_email        alessandro.prescimone@unibas.ch
_audit_contact_author_name         'Prescimone, A.'
_audit_contact_author_phone        ''
_publ_contact_author_id_orcid      https://orcid.org/0000-0002-3631-5210
_publ_section_references
;
Dolomanov, O.V., Bourhis, L.J., Gildea, R.J, Howard, J.A.K. & Puschmann, H.
 (2009), J. Appl. Cryst. 42, 339-341.

Sheldrick, G.M. (2015). Acta Cryst. A71, 3-8.

Sheldrick, G.M. (2015). Acta Cryst. C71, 3-8.
;
_chemical_name_common              ?
_chemical_name_systematic          ?
_chemical_formula_moiety           'C52 H44 Cu N8, F6 P, 1[C4H10O1]'
_chemical_formula_sum              'C56 H54 Cu F6 N8 O P'
_chemical_formula_weight           1063.58
_chemical_absolute_configuration   ad
_chemical_melting_point            ?
loop_
  _atom_type_symbol
  _atom_type_description
  _atom_type_scat_dispersion_real
  _atom_type_scat_dispersion_imag
  _atom_type_scat_source
 'C' 'C' 0.0181 0.0091 'International Tables Vol C Tables 4.2.6.8 and 6.1.1.4'
 'Cu' 'Cu' -1.9646 0.5888
 'International Tables Vol C Tables 4.2.6.8 and 6.1.1.4'
 'F' 'F' 0.0727 0.0534 'International Tables Vol C Tables 4.2.6.8 and 6.1.1.4'
 'H' 'H' 0.0000 0.0000 'International Tables Vol C Tables 4.2.6.8 and 6.1.1.4'
 'N' 'N' 0.0311 0.0180 'International Tables Vol C Tables 4.2.6.8 and 6.1.1.4'
 'O' 'O' 0.0492 0.0322 'International Tables Vol C Tables 4.2.6.8 and 6.1.1.4'
 'P' 'P' 0.2955 0.4335 'International Tables Vol C Tables 4.2.6.8 and 6.1.1.4'

_shelx_space_group_comment
;
The symmetry employed for this shelxl refinement is uniquely defined
by the following loop, which should always be used as a source of
symmetry information in preference to the above space-group names.
They are only intended as comments.
;
_space_group_crystal_system        'tetragonal'
_space_group_IT_number             91
_space_group_name_H-M_alt          'P 41 2 2'
_space_group_name_Hall             'P 4w 2c'
loop_
  _space_group_symop_operation_xyz
 'x, y, z'
 '-x, -y, z+1/2'
 '-y, x, z+1/4'
 'y, -x, z+3/4'
 '-x, y, -z'
 'x, -y, -z+1/2'
 'y, x, -z+3/4'
 '-y, -x, -z+1/4'

_cell_length_a                     11.1913(7)
_cell_length_b                     11.1913(7)
_cell_length_c                     39.724(3)
_cell_angle_alpha                  90
_cell_angle_beta                   90
_cell_angle_gamma                  90
_cell_volume                       4975.2(7)
_cell_formula_units_Z              4
_cell_measurement_reflns_used      9934
_cell_measurement_temperature      130
_cell_measurement_theta_max        69.54
_cell_measurement_theta_min        3.95
_shelx_estimated_absorpt_T_max     0.814
_shelx_estimated_absorpt_T_min     0.749
_exptl_absorpt_coefficient_mu      1.535
_exptl_absorpt_correction_T_max    0.7533
_exptl_absorpt_correction_T_min    0.6131
_exptl_absorpt_correction_type     multi-scan
_exptl_absorpt_process_details
;
SADABS-2012/1 (Bruker,2012) was used for absorption correction.
wR2(int) was 0.0728 before and 0.0535 after correction.
The Ratio of minimum to maximum transmission is 0.8139.
The \l/2 correction factor is 0.0015.
;
_exptl_absorpt_special_details     ?
_exptl_crystal_colour              black
_exptl_crystal_colour_primary      black
_exptl_crystal_density_diffrn      1.420
_exptl_crystal_density_meas        ?
_exptl_crystal_density_method      ?
_exptl_crystal_description         block
_exptl_crystal_F_000               2208
_exptl_crystal_recrystallization_method 
 'The material was recrystallised from a mixture of DCM and Et2O  by solvent layering'
_exptl_crystal_size_max            0.2
_exptl_crystal_size_mid            0.18
_exptl_crystal_size_min            0.14
_exptl_transmission_factor_max     ?
_exptl_transmission_factor_min     ?
_diffrn_reflns_av_R_equivalents    0.0318
_diffrn_reflns_av_unetI/netI       0.0314
_diffrn_reflns_Laue_measured_fraction_full  0.997
_diffrn_reflns_Laue_measured_fraction_max  0.982
_diffrn_reflns_limit_h_max         13
_diffrn_reflns_limit_h_min         -10
_diffrn_reflns_limit_k_max         13
_diffrn_reflns_limit_k_min         -13
_diffrn_reflns_limit_l_max         44
_diffrn_reflns_limit_l_min         -46
_diffrn_reflns_number              25745
_diffrn_reflns_point_group_measured_fraction_full  0.998
_diffrn_reflns_point_group_measured_fraction_max  0.976
_diffrn_reflns_theta_full          67.679
_diffrn_reflns_theta_max           70.215
_diffrn_reflns_theta_min           3.950
_diffrn_ambient_temperature        130
_diffrn_detector_area_resol_mean   ?
_diffrn_measured_fraction_theta_full  0.997
_diffrn_measured_fraction_theta_max  0.982
_diffrn_measurement_device         Area
_diffrn_measurement_device_type    'Bruker Kappa Apex2'
_diffrn_measurement_method         '\f & \w scans'
_diffrn_radiation_monochromator    graphite
_diffrn_radiation_probe            x-ray
_diffrn_radiation_type             CuK\a
_diffrn_radiation_wavelength       1.54178
_diffrn_source                     ?
_diffrn_standards_number           0
_reflns_Friedel_coverage           0.664
_reflns_Friedel_fraction_full      0.998
_reflns_Friedel_fraction_max       0.967
_reflns_number_gt                  4412
_reflns_number_total               4642
_reflns_special_details
;
 Reflections were merged by SHELXL according to the crystal
 class for the calculation of statistics and refinement.
 
 Structure factors included contributions from the .fab file.
 
 _reflns_Friedel_fraction is defined as the number of unique
 Friedel pairs measured divided by the number that would be
 possible theoretically, ignoring centric projections and
 systematic absences.
;
_reflns_threshold_expression       'I > 2\s(I)'
_computing_cell_refinement         'Apex2 (Bruker AXS, 2006)'
_computing_data_collection         'Apex2 (Bruker AXS, 2006)'
_computing_data_reduction          'Apex2 (Bruker AXS, 2006)'
_computing_molecular_graphics      'Olex2 (Dolomanov et al., 2009)'
_computing_publication_material    'Olex2 (Dolomanov et al., 2009)'
_computing_structure_refinement    'ShelXL (Sheldrick, 2015)'
_computing_structure_solution      'ShelXT (Sheldrick, 2015)'
_refine_diff_density_max           0.484
_refine_diff_density_min           -0.354
_refine_diff_density_rms           0.059
_refine_ls_abs_structure_details
;
 Flack x determined using 1674 quotients [(I+)-(I-)]/[(I+)+(I-)]
 (Parsons, Flack and Wagner, Acta Cryst. B69 (2013) 249-259).
;
_refine_ls_abs_structure_Flack     0.057(11)
_refine_ls_extinction_coef         .
_refine_ls_extinction_method       none
_refine_ls_goodness_of_fit_ref     1.031
_refine_ls_hydrogen_treatment      constr
_refine_ls_matrix_type             full
_refine_ls_number_parameters       310
_refine_ls_number_reflns           4642
_refine_ls_number_restraints       0
_refine_ls_R_factor_all            0.0705
_refine_ls_R_factor_gt             0.0679
_refine_ls_restrained_S_all        1.031
_refine_ls_shift/su_max            0.000
_refine_ls_shift/su_mean           0.000
_refine_ls_structure_factor_coef   Fsqd
_refine_ls_weighting_details      
 'w=1/[\s^2^(Fo^2^)+(0.1210P)^2^+3.1951P] where P=(Fo^2^+2Fc^2^)/3'
_refine_ls_weighting_scheme        calc
_refine_ls_wR_factor_gt            0.2001
_refine_ls_wR_factor_ref           0.2035
_refine_special_details            ?
_olex2_refinement_description
;
1. Fixed Uiso
 At 1.2 times of:
  All C(H) groups
 At 1.5 times of:
  All C(H,H,H) groups
2.a Aromatic/amide H refined with riding coordinates:
 C13(H13), C2(H2), C12(H12), C4(H4), C7(H7), C23(H23), C16(H16), C9(H9),
 C24(H24), C25(H25), C22(H22), C26(H26), C17(H17), C18(H18), C20(H20), C19(H19)
2.b Idealised Me refined as rotating group:
 C14(H14A,H14B,H14C), C11(H11A,H11B,H11C)
;
_atom_sites_solution_hydrogens     geom
_atom_sites_solution_primary       dual
_atom_sites_solution_secondary     ?
loop_
  _atom_site_label
  _atom_site_type_symbol
  _atom_site_fract_x
  _atom_site_fract_y
  _atom_site_fract_z
  _atom_site_U_iso_or_equiv
  _atom_site_adp_type
  _atom_site_occupancy
  _atom_site_site_symmetry_order
  _atom_site_calc_flag
  _atom_site_refinement_flags_posn
  _atom_site_refinement_flags_adp
  _atom_site_refinement_flags_occupancy
  _atom_site_disorder_assembly
  _atom_site_disorder_group
 Cu1 Cu 0.500000 0.18519(11) 0.500000 0.0753(4) Uani 1 2 d S T P . .
 P1 P 1.06077(15) 0.06077(15) 0.375000 0.0717(6) Uani 1 2 d S T P . .
 N1 N 0.5251(5) 0.0909(4) 0.45683(10) 0.0686(12) Uani 1 1 d . . . . .
 N2 N 0.6547(5) 0.2630(5) 0.48438(14) 0.0796(15) Uani 1 1 d . . . . .
 N3 N 0.5874(6) -0.1951(5) 0.35940(13) 0.0793(14) Uani 1 1 d . . . . .
 C3 C 0.6074(6) -0.0477(5) 0.40296(14) 0.0681(14) Uani 1 1 d . . . . .
 F2 F 0.9696(6) 0.1644(6) 0.36802(17) 0.148(2) Uani 1 1 d . . . . .
 C5 C 0.6338(5) 0.1107(5) 0.44227(14) 0.0656(14) Uani 1 1 d . . . . .
 C13 C 0.6520(7) -0.1181(6) 0.37386(16) 0.0764(16) Uani 1 1 d . . . . .
 H13 H 0.730955 -0.104938 0.365940 0.092 Uiso 1 1 calc R . . . .
 C1 C 0.4557(6) 0.0030(6) 0.44411(12) 0.0715(15) Uani 1 1 d . . . . .
 N4 N 1.0266(6) 0.4872(5) 0.44295(15) 0.0914(18) Uani 1 1 d . . . . .
 C2 C 0.4957(7) -0.0653(5) 0.41700(13) 0.0749(16) Uani 1 1 d . . . . .
 H2 H 0.444999 -0.125415 0.407966 0.090 Uiso 1 1 calc R . . . .
 C6 C 0.6986(6) 0.2135(5) 0.45596(15) 0.0713(16) Uani 1 1 d . . . . .
 C12 C 0.9676(6) 0.4082(5) 0.43026(17) 0.0750(17) Uani 1 1 d . . . . .
 H12 H 0.985087 0.379175 0.408333 0.090 Uiso 1 1 calc R . . . .
 C4 C 0.6767(6) 0.0418(5) 0.41585(15) 0.0700(14) Uani 1 1 d . . . . .
 H4 H 0.753812 0.056759 0.406795 0.084 Uiso 1 1 calc R . . . .
 C7 C 0.8004(7) 0.2609(6) 0.4395(2) 0.086(2) Uani 1 1 d . . . . .
 H7 H 0.827089 0.224561 0.419260 0.104 Uiso 1 1 calc R . . . .
 C23 C 1.2686(6) 0.5100(7) 0.37797(16) 0.0786(16) Uani 1 1 d . . . . .
 H23 H 1.311372 0.465017 0.361655 0.094 Uiso 1 1 calc R . . . .
 C8 C 0.8604(7) 0.3552(6) 0.4516(2) 0.088(2) Uani 1 1 d . . . . .
 C16 C 0.6058(7) -0.3704(8) 0.3239(2) 0.094(2) Uani 1 1 d . . . . .
 H16 H 0.553529 -0.410971 0.338850 0.113 Uiso 1 1 calc R . . . .
 C9 C 0.8166(8) 0.4042(6) 0.4802(3) 0.109(3) Uani 1 1 d . . . . .
 H9 H 0.855814 0.472076 0.489361 0.131 Uiso 1 1 calc R . . . .
 C24 C 1.2984(6) 0.6273(7) 0.3841(2) 0.091(2) Uani 1 1 d . . . . .
 H24 H 1.363024 0.662618 0.372187 0.109 Uiso 1 1 calc R . . . .
 F3 F 1.1365(6) 0.1211(10) 0.3472(2) 0.198(4) Uani 1 1 d . . . . .
 C15 C 0.6369(7) -0.2521(7) 0.33003(19) 0.0863(19) Uani 1 1 d . . . . .
 C21 C 1.1154(6) 0.5294(7) 0.42016(18) 0.0864(19) Uani 1 1 d . . . . .
 C25 C 1.2367(7) 0.6926(9) 0.4067(3) 0.108(3) Uani 1 1 d . . . . .
 H25 H 1.257204 0.774277 0.409764 0.129 Uiso 1 1 calc R . . . .
 C22 C 1.1750(6) 0.4573(6) 0.39593(18) 0.0832(18) Uani 1 1 d . . . . .
 H22 H 1.152104 0.376631 0.392111 0.100 Uiso 1 1 calc R . . . .
 C26 C 1.1497(8) 0.6473(8) 0.4245(2) 0.098(3) Uani 1 1 d . . . . .
 H26 H 1.109709 0.695600 0.440657 0.118 Uiso 1 1 calc R . . . .
 C14 C 0.3363(7) -0.0116(7) 0.45997(15) 0.093(2) Uani 1 1 d . . . . .
 H14A H 0.345847 -0.045039 0.482611 0.139 Uiso 1 1 calc GR . . . .
 H14B H 0.287566 -0.065741 0.446288 0.139 Uiso 1 1 calc GR . . . .
 H14C H 0.296837 0.066388 0.461471 0.139 Uiso 1 1 calc GR . . . .
 C10 C 0.7113(8) 0.3570(6) 0.4977(2) 0.095(2) Uani 1 1 d . . . . .
 F1 F 0.9846(8) 0.0007(13) 0.4017(2) 0.237(5) Uani 1 1 d . . . . .
 C17 C 0.6503(8) -0.4285(10) 0.2963(2) 0.107(3) Uani 1 1 d . . . . .
 H17 H 0.632636 -0.510549 0.292714 0.129 Uiso 1 1 calc R . . . .
 C11 C 0.6593(11) 0.4052(9) 0.5294(2) 0.125(4) Uani 1 1 d . . . . .
 H11A H 0.573567 0.418932 0.526277 0.187 Uiso 1 1 calc GR . . . .
 H11B H 0.698646 0.480752 0.535105 0.187 Uiso 1 1 calc GR . . . .
 H11C H 0.671542 0.347609 0.547663 0.187 Uiso 1 1 calc GR . . . .
 C18 C 0.7227(10) -0.3656(14) 0.2733(3) 0.136(4) Uani 1 1 d . . . . .
 H18 H 0.749372 -0.404997 0.253500 0.163 Uiso 1 1 calc R . . . .
 C20 C 0.7094(9) -0.1949(9) 0.3073(2) 0.109(3) Uani 1 1 d . . . . .
 H20 H 0.729382 -0.113541 0.311154 0.131 Uiso 1 1 calc R . . . .
 C19 C 0.7549(12) -0.2514(12) 0.2786(3) 0.134(4) Uani 1 1 d . . . . .
 H19 H 0.806547 -0.210689 0.263439 0.160 Uiso 1 1 calc R . . . .

loop_
  _atom_site_aniso_label
  _atom_site_aniso_U_11
  _atom_site_aniso_U_22
  _atom_site_aniso_U_33
  _atom_site_aniso_U_23
  _atom_site_aniso_U_13
  _atom_site_aniso_U_12
 Cu1 0.1061(10) 0.0683(7) 0.0516(6) 0.000 -0.0296(6) 0.000
 P1 0.0724(8) 0.0724(8) 0.0702(12) -0.0101(7) 0.0101(7) 0.0116(10)
 N1 0.095(3) 0.067(2) 0.044(2) 0.0073(18) -0.023(2) -0.018(2)
 N2 0.094(4) 0.063(3) 0.082(3) 0.001(2) -0.045(3) -0.005(2)
 N3 0.100(4) 0.078(3) 0.061(3) -0.001(2) -0.014(3) 0.002(3)
 C3 0.083(4) 0.061(3) 0.060(3) 0.006(2) -0.017(3) 0.001(3)
 F2 0.133(5) 0.175(6) 0.136(5) -0.014(4) -0.009(4) 0.074(4)
 C5 0.078(4) 0.059(3) 0.060(3) 0.013(2) -0.024(3) -0.009(2)
 C13 0.094(4) 0.069(3) 0.067(3) 0.007(3) -0.013(3) 0.009(3)
 C1 0.096(4) 0.073(3) 0.046(2) 0.004(2) -0.012(3) -0.020(3)
 N4 0.104(4) 0.080(3) 0.091(4) -0.022(3) -0.033(3) 0.018(3)
 C2 0.103(4) 0.070(3) 0.051(3) 0.003(2) -0.019(3) -0.024(3)
 C6 0.079(4) 0.060(3) 0.075(3) 0.007(3) -0.037(3) -0.004(3)
 C12 0.078(4) 0.064(3) 0.084(4) -0.021(3) -0.034(3) 0.015(3)
 C4 0.081(4) 0.060(3) 0.070(3) 0.006(2) -0.019(3) 0.001(3)
 C7 0.083(4) 0.069(3) 0.107(5) 0.020(3) -0.044(4) -0.011(3)
 C23 0.083(4) 0.088(4) 0.065(3) -0.003(3) -0.014(3) 0.023(3)
 C8 0.097(5) 0.073(4) 0.094(5) -0.007(4) -0.037(4) 0.006(3)
 C16 0.077(4) 0.104(5) 0.101(5) -0.016(4) -0.018(4) 0.014(4)
 C9 0.109(6) 0.060(3) 0.159(8) 0.018(4) -0.086(6) -0.026(4)
 C24 0.066(4) 0.107(5) 0.101(5) -0.006(4) -0.020(3) 0.013(3)
 F3 0.127(5) 0.286(11) 0.181(6) 0.144(7) 0.028(5) 0.011(5)
 C15 0.090(4) 0.091(5) 0.078(4) -0.008(4) -0.019(4) 0.019(4)
 C21 0.070(4) 0.114(6) 0.075(4) 0.003(4) -0.007(3) 0.022(4)
 C25 0.071(4) 0.104(5) 0.149(7) -0.044(6) -0.042(5) 0.017(4)
 C22 0.089(4) 0.076(4) 0.085(4) 0.009(3) -0.010(3) 0.030(3)
 C26 0.089(5) 0.094(5) 0.112(6) -0.037(5) -0.030(5) 0.025(4)
 C14 0.126(6) 0.099(5) 0.053(3) -0.011(3) 0.002(3) -0.043(5)
 C10 0.121(6) 0.072(3) 0.091(4) -0.006(3) -0.058(4) -0.006(4)
 F1 0.174(7) 0.375(14) 0.162(6) 0.088(9) 0.071(6) -0.022(9)
 C17 0.090(5) 0.119(7) 0.112(6) -0.040(6) -0.013(5) 0.014(5)
 C11 0.165(9) 0.103(6) 0.106(6) -0.028(5) -0.058(6) -0.013(6)
 C18 0.110(7) 0.172(12) 0.127(8) -0.046(8) 0.014(6) 0.012(7)
 C20 0.125(7) 0.098(6) 0.106(6) -0.002(5) 0.022(5) 0.015(5)
 C19 0.158(10) 0.129(8) 0.114(7) 0.003(7) 0.032(7) 0.037(8)

_geom_special_details
;
 All esds (except the esd in the dihedral angle between two l.s. planes)
 are estimated using the full covariance matrix.  The cell esds are taken
 into account individually in the estimation of esds in distances, angles
 and torsion angles; correlations between esds in cell parameters are only
 used when they are defined by crystal symmetry.  An approximate (isotropic)
 treatment of cell esds is used for estimating esds involving l.s. planes.
;
loop_
  _geom_bond_atom_site_label_1
  _geom_bond_atom_site_label_2
  _geom_bond_distance
  _geom_bond_site_symmetry_2
  _geom_bond_publ_flag
 Cu1 N1 2.033(5) 5_656 ?
 Cu1 N1 2.033(5) . ?
 Cu1 N2 2.035(6) . ?
 Cu1 N2 2.035(6) 5_656 ?
 P1 F2 1.569(6) . ?
 P1 F2 1.569(6) 7_645 ?
 P1 F3 1.548(6) . ?
 P1 F3 1.548(6) 7_645 ?
 P1 F1 1.519(7) . ?
 P1 F1 1.519(7) 7_645 ?
 N1 C5 1.364(8) . ?
 N1 C1 1.351(7) . ?
 N2 C6 1.350(9) . ?
 N2 C10 1.338(8) . ?
 N3 C13 1.262(9) . ?
 N3 C15 1.441(9) . ?
 C3 C13 1.485(9) . ?
 C3 C2 1.384(10) . ?
 C3 C4 1.366(8) . ?
 C5 C6 1.465(8) . ?
 C5 C4 1.388(9) . ?
 C1 C2 1.395(9) . ?
 C1 C14 1.486(10) . ?
 N4 C12 1.213(8) . ?
 N4 C21 1.425(10) . ?
 C6 C7 1.417(10) . ?
 C12 C8 1.583(11) . ?
 C7 C8 1.339(10) . ?
 C23 C24 1.376(11) . ?
 C23 C22 1.398(10) . ?
 C8 C9 1.355(13) . ?
 C16 C15 1.390(11) . ?
 C16 C17 1.367(12) . ?
 C9 C10 1.467(14) . ?
 C24 C25 1.349(11) . ?
 C15 C20 1.373(12) . ?
 C21 C22 1.422(10) . ?
 C21 C26 1.385(12) . ?
 C25 C26 1.307(14) . ?
 C10 C11 1.487(14) . ?
 C17 C18 1.410(16) . ?
 C18 C19 1.345(16) . ?
 C20 C19 1.400(13) . ?

loop_
  _geom_angle_atom_site_label_1
  _geom_angle_atom_site_label_2
  _geom_angle_atom_site_label_3
  _geom_angle
  _geom_angle_site_symmetry_1
  _geom_angle_site_symmetry_3
  _geom_angle_publ_flag
 N1 Cu1 N1 117.4(3) 5_656 . ?
 N1 Cu1 N2 81.2(2) . . ?
 N1 Cu1 N2 81.2(2) 5_656 5_656 ?
 N1 Cu1 N2 126.7(2) . 5_656 ?
 N1 Cu1 N2 126.7(2) 5_656 . ?
 N2 Cu1 N2 129.3(3) 5_656 . ?
 F2 P1 F2 172.8(6) . 7_645 ?
 F3 P1 F2 90.3(4) 7_645 . ?
 F3 P1 F2 84.7(4) . . ?
 F3 P1 F2 84.7(4) 7_645 7_645 ?
 F3 P1 F2 90.3(4) . 7_645 ?
 F3 P1 F3 91.8(8) 7_645 . ?
 F1 P1 F2 94.9(6) 7_645 7_645 ?
 F1 P1 F2 90.2(5) . 7_645 ?
 F1 P1 F2 90.2(5) 7_645 . ?
 F1 P1 F2 94.9(6) . . ?
 F1 P1 F3 89.3(6) 7_645 . ?
 F1 P1 F3 178.8(6) . . ?
 F1 P1 F3 178.8(6) 7_645 7_645 ?
 F1 P1 F3 89.3(6) . 7_645 ?
 F1 P1 F1 89.5(10) . 7_645 ?
 C5 N1 Cu1 113.3(4) . . ?
 C1 N1 Cu1 127.8(4) . . ?
 C1 N1 C5 118.2(5) . . ?
 C6 N2 Cu1 112.9(4) . . ?
 C10 N2 Cu1 128.2(6) . . ?
 C10 N2 C6 118.8(7) . . ?
 C13 N3 C15 116.8(7) . . ?
 C2 C3 C13 122.8(6) . . ?
 C4 C3 C13 119.4(6) . . ?
 C4 C3 C2 117.8(6) . . ?
 N1 C5 C6 114.3(6) . . ?
 N1 C5 C4 122.6(5) . . ?
 C4 C5 C6 123.1(6) . . ?
 N3 C13 C3 121.6(7) . . ?
 N1 C1 C2 120.2(6) . . ?
 N1 C1 C14 116.0(6) . . ?
 C2 C1 C14 123.8(6) . . ?
 C12 N4 C21 110.9(6) . . ?
 C3 C2 C1 121.5(5) . . ?
 N2 C6 C5 116.9(6) . . ?
 N2 C6 C7 121.6(6) . . ?
 C7 C6 C5 121.4(6) . . ?
 N4 C12 C8 117.6(6) . . ?
 C3 C4 C5 119.6(6) . . ?
 C8 C7 C6 122.3(8) . . ?
 C24 C23 C22 119.6(7) . . ?
 C7 C8 C12 119.0(7) . . ?
 C7 C8 C9 115.9(8) . . ?
 C9 C8 C12 124.9(6) . . ?
 C17 C16 C15 120.2(9) . . ?
 C8 C9 C10 122.9(6) . . ?
 C25 C24 C23 120.7(9) . . ?
 C16 C15 N3 117.9(8) . . ?
 C20 C15 N3 123.6(8) . . ?
 C20 C15 C16 118.4(8) . . ?
 C22 C21 N4 124.7(7) . . ?
 C26 C21 N4 115.4(7) . . ?
 C26 C21 C22 119.7(8) . . ?
 C26 C25 C24 122.2(9) . . ?
 C23 C22 C21 117.2(7) . . ?
 C25 C26 C21 120.5(8) . . ?
 N2 C10 C9 118.4(8) . . ?
 N2 C10 C11 115.8(8) . . ?
 C9 C10 C11 125.8(7) . . ?
 C16 C17 C18 119.4(10) . . ?
 C19 C18 C17 121.9(10) . . ?
 C15 C20 C19 122.7(11) . . ?
 C18 C19 C20 117.3(12) . . ?

_smtbx_masks_special_details       ?
loop_
  _smtbx_masks_void_nr
  _smtbx_masks_void_average_x
  _smtbx_masks_void_average_y
  _smtbx_masks_void_average_z
  _smtbx_masks_void_volume
  _smtbx_masks_void_count_electrons
  _smtbx_masks_void_content
 1 0.000 0.013 0.000 131.5 40.9 '0.5 C4H10O1'
 2 -0.013 0.000 0.250 131.5 41.1 '0.5 C4H10O1'
 3 0.000 -0.013 0.500 131.5 40.9 '0.5 C4H10O1'
 4 0.013 0.000 0.750 131.5 40.7 '0.5 C4H10O1'

_smtbx_masks_void_probe_radius     1.2
_smtbx_masks_void_truncation_radius  1.2
_shelx_res_file
;
TITL pfphcomplex_130k_0m_a.res in P4(1)22
    pfphcomplex_130k_0m.res
    created by SHELXL-2018/3 at 14:38:33 on 30-Jan-2020
REM Old TITL PFPHcomplex_130K_0m in P4122 #91
REM SHELXT solution in P4(1)22: R1 0.366, Rweak 0.127, Alpha 0.015
REM <I/s> 2.183 for 25 systematic absences, Orientation as input
REM Flack x = 0.275 ( 0.010 ) from 1722 Parsons' quotients
REM Formula found by SHELXT: C52 N10 F6 P Cu
CELL 1.54178 11.1913 11.1913 39.7239 90 90 90
ZERR 4 0.0007 0.0007 0.0025 0 0 0
LATT -1
SYMM -X,-Y,0.5+Z
SYMM -Y,+X,0.25+Z
SYMM +Y,-X,0.75+Z
SYMM -X,+Y,-Z
SYMM +X,-Y,0.5-Z
SYMM +Y,+X,0.75-Z
SYMM -Y,-X,0.25-Z
SFAC C Cu F H N O P
UNIT 224 4 24 216 32 4 4

L.S. 10 0 0
PLAN  5
SIZE 0.14 0.18 0.2
TEMP -143.15
list 4
ABIN
fmap 2 53
acta
REM <olex2.extras>
REM <HklSrc "%./PFPHcomplex_130K_0m.hkl">
REM </olex2.extras>

WGHT    0.121000    3.195100
FVAR       0.34963
CU1   2    0.500000    0.185187    0.500000    10.50000    0.10606    0.06833 =
         0.05163    0.00000   -0.02955    0.00000
P1    7    1.060770    0.060770    0.375000    10.50000    0.07243    0.07243 =
         0.07022   -0.01013    0.01013    0.01157
N1    5    0.525107    0.090855    0.456831    11.00000    0.09473    0.06718 =
         0.04380    0.00734   -0.02260   -0.01850
N2  5    0.654708    0.263005    0.484377    11.00000    0.09400    0.06250 =
         0.08240    0.00090   -0.04468   -0.00538
N3  5    0.587400   -0.195061    0.359396    11.00000    0.09955    0.07768 =
         0.06078   -0.00109   -0.01440    0.00230
C3    1    0.607444   -0.047660    0.402962    11.00000    0.08317    0.06133 =
         0.05995    0.00584   -0.01690    0.00150
F2  3    0.969586    0.164393    0.368016    11.00000    0.13282    0.17451 =
         0.13577   -0.01414   -0.00885    0.07384
C5    1    0.633750    0.110669    0.442275    11.00000    0.07786    0.05870 =
         0.06010    0.01337   -0.02422   -0.00894
C13   1    0.651951   -0.118109    0.373863    11.00000    0.09373    0.06874 =
         0.06665    0.00669   -0.01348    0.00914
AFIX  43
H13   4    0.730955   -0.104938    0.365940    11.00000   -1.20000
AFIX   0
C1    1    0.455654    0.002994    0.444113    11.00000    0.09575    0.07253 =
         0.04607    0.00405   -0.01178   -0.02004
N4  5    1.026599    0.487178    0.442945    11.00000    0.10381    0.07970 =
         0.09059   -0.02232   -0.03267    0.01797
C2    1    0.495662   -0.065332    0.417005    11.00000    0.10305    0.07042 =
         0.05124    0.00312   -0.01906   -0.02409
AFIX  43
H2    4    0.444999   -0.125415    0.407966    11.00000   -1.20000
AFIX   0
C6    1    0.698593    0.213514    0.455965    11.00000    0.07902    0.06025 =
         0.07458    0.00747   -0.03683   -0.00431
C12   1    0.967598    0.408202    0.430260    11.00000    0.07770    0.06377 =
         0.08366   -0.02053   -0.03380    0.01501
AFIX  43
H12   4    0.985087    0.379175    0.408333    11.00000   -1.20000
AFIX   0
C4    1    0.676693    0.041775    0.415854    11.00000    0.08062    0.05962 =
         0.06967    0.00555   -0.01855    0.00104
AFIX  43
H4    4    0.753812    0.056759    0.406795    11.00000   -1.20000
AFIX   0
C7    1    0.800429    0.260928    0.439522    11.00000    0.08340    0.06869 =
         0.10701    0.02020   -0.04366   -0.01083
AFIX  43
H7    4    0.827089    0.224561    0.419260    11.00000   -1.20000
AFIX   0
C23   1    1.268563    0.509953    0.377971    11.00000    0.08332    0.08771 =
         0.06476   -0.00293   -0.01392    0.02307
AFIX  43
H23   4    1.311372    0.465017    0.361655    11.00000   -1.20000
AFIX   0
C8    1    0.860382    0.355218    0.451555    11.00000    0.09736    0.07325 =
         0.09417   -0.00650   -0.03707    0.00639
C16   1    0.605820   -0.370419    0.323871    11.00000    0.07662    0.10394 =
         0.10081   -0.01608   -0.01752    0.01374
AFIX  43
H16   4    0.553529   -0.410971    0.338850    11.00000   -1.20000
AFIX   0
C9    1    0.816581    0.404163    0.480212    11.00000    0.10883    0.05976 =
         0.15867    0.01814   -0.08567   -0.02629
AFIX  43
H9    4    0.855814    0.472076    0.489361    11.00000   -1.20000
AFIX   0
C24   1    1.298356    0.627272    0.384055    11.00000    0.06558    0.10664 =
         0.10088   -0.00635   -0.01957    0.01265
AFIX  43
H24   4    1.363024    0.662618    0.372187    11.00000   -1.20000
AFIX   0

F3  3    1.136516    0.121130    0.347187    11.00000    0.12664    0.28639 =
         0.18143    0.14436    0.02815    0.01091
C15   1    0.636896   -0.252133    0.330031    11.00000    0.08981    0.09080 =
         0.07818   -0.00790   -0.01911    0.01907
C21   1    1.115361    0.529392    0.420158    11.00000    0.07031    0.11359 =
         0.07534    0.00324   -0.00736    0.02205
C25   1    1.236709    0.692625    0.406695    11.00000    0.07130    0.10371 =
         0.14858   -0.04427   -0.04215    0.01734
AFIX  43
H25   4    1.257204    0.774277    0.409764    11.00000   -1.20000
AFIX   0
C22   1    1.174955    0.457254    0.395930    11.00000    0.08858    0.07614 =
         0.08499    0.00863   -0.01030    0.03036
AFIX  43
H22   4    1.152104    0.376631    0.392111    11.00000   -1.20000
AFIX   0
C26   1    1.149720    0.647299    0.424542    11.00000    0.08851    0.09447 =
         0.11211   -0.03662   -0.03028    0.02486
AFIX  43
H26   4    1.109709    0.695600    0.440657    11.00000   -1.20000
AFIX   0
C14   1    0.336323   -0.011590    0.459970    11.00000    0.12641    0.09936 =
         0.05316   -0.01115    0.00167   -0.04308
AFIX 137
H14A  4    0.345847   -0.045039    0.482611    11.00000   -1.50000
H14B  4    0.287566   -0.065741    0.446288    11.00000   -1.50000
H14C  4    0.296837    0.066388    0.461471    11.00000   -1.50000
AFIX   0
C10   1    0.711302    0.356985    0.497742    11.00000    0.12092    0.07182 =
         0.09114   -0.00597   -0.05796   -0.00605

F1    3    0.984561    0.000650    0.401739    11.00000    0.17400    0.37463 =
         0.16184    0.08843    0.07146   -0.02221
C17   1    0.650309   -0.428513    0.296319    11.00000    0.09045    0.11936 =
         0.11190   -0.03962   -0.01339    0.01378
AFIX  43
H17   4    0.632636   -0.510549    0.292714    11.00000   -1.20000
AFIX   0
C11   1    0.659337    0.405175    0.529393    11.00000    0.16486    0.10330 =
         0.10582   -0.02809   -0.05768   -0.01251
AFIX 137
H11A  4    0.573567    0.418932    0.526277    11.00000   -1.50000
H11B  4    0.698646    0.480752    0.535105    11.00000   -1.50000
H11C  4    0.671542    0.347609    0.547663    11.00000   -1.50000
AFIX   0
C18   1    0.722658   -0.365587    0.273299    11.00000    0.10955    0.17152 =
         0.12693   -0.04643    0.01379    0.01238
AFIX  43
H18   4    0.749372   -0.404997    0.253500    11.00000   -1.20000
AFIX   0
C20   1    0.709357   -0.194870    0.307266    11.00000    0.12469    0.09797 =
         0.10552   -0.00170    0.02158    0.01549
AFIX  43
H20   4    0.729382   -0.113541    0.311154    11.00000   -1.20000
AFIX   0
C19   1    0.754923   -0.251376    0.278572    11.00000    0.15807    0.12878 =
         0.11408    0.00295    0.03218    0.03663
AFIX  43
H19   4    0.806547   -0.210689    0.263439    11.00000   -1.20000
AFIX   0
HKLF 4


REM  pfphcomplex_130k_0m_a.res in P4(1)22
REM wR2 = 0.2035, GooF = S = 1.031, Restrained GooF = 1.031 for all data
REM R1 = 0.0679 for 4412 Fo > 4sig(Fo) and 0.0705 for all 4642 data
REM 310 parameters refined using 0 restraints

END

WGHT      0.1210      3.1950

REM Highest difference peak  0.484,  deepest hole -0.354,  1-sigma level  0.059
Q1    1   0.9369  0.4391  0.4601  11.00000  0.05    0.48
Q2    1   0.9638  0.1213  0.3916  11.00000  0.05    0.45
Q3    1   0.9777  0.1333  0.4004  11.00000  0.05    0.44
Q4    1   0.9418  0.4420  0.4522  11.00000  0.05    0.44
Q5    1   1.0561  0.1568  0.3505  11.00000  0.05    0.42
;
_shelx_res_checksum                24208
_shelx_hkl_file
;
   0  -1   0  848.42   36.80
   1   0   0  861.91   36.80
   1   0   0  790.02   46.40
   1  -1   0 1155.08   51.19
   1  -2   0 8466.25  373.16
   2   0   0 1601.24   95.09
   0  -2   0 1754.72   75.49
   2   0   0 1786.42   75.59
  -1  -2   0 9142.29  403.06
   2  -1   0 9166.58  403.56
   2  -2   0 4470.75  197.28
   2  -3   0   54.89    2.60
   3   2   0   53.39    3.00
   3   1   0   82.79    4.60
   1  -3   0   74.49    3.70
   3   0   0 1706.83   95.89
   0  -3   0 1744.53   76.09
   3  -1   0   80.69    3.90
  -1  -3   0   90.29    3.90
   2   3   0   49.60    2.80
   3  -2   0   53.19    2.50
   3   3   0  326.47   15.60
   3  -3   0  289.77   13.80
   3  -4   0   41.00    2.30
   4   3   0   42.00    2.60
   3  -4   0   44.50    2.50
   2  -4   0  118.59    6.70
   4   2   0  128.29    7.20
   2  -4   0  125.19    5.70
   4   2   0  122.69    6.50
   4   1   0   52.89    2.90
   1  -4   0   50.29    2.60
   4   1   0   52.59    3.20
   4   0   0   25.90    1.70
   4   0   0   26.70    1.70
   4  -1   0   56.19    2.70
  -1  -4   0   55.59    2.60
   2   4   0  125.59    6.60
   4  -2   0  133.19    5.90
   4  -2   0  124.99    6.90
   3   4   0   39.50    2.50
   4  -3   0   47.00    2.50
   4  -3   0   38.00    2.20
   4  -4   0  105.99    6.00
   4   4   0  109.39    5.90
   4  -4   0  111.59    5.20
   4  -5   0   75.39    3.80
   4  -5   0   68.89    4.20
   5   4   0   76.29    4.30
   5   4   0   75.89    4.70
   3  -5   0   14.60    1.20
   3  -5   0   13.30    1.10
   5   3   0   16.00    1.50
   5   3   0   13.40    1.30
   5   2   0   29.10    2.00
   2  -5   0   25.30    1.60
   2  -5   0   25.20    1.70
   5   2   0   27.50    1.90
   5   1   0  510.95   26.30
   1  -5   0  528.45   23.30
   1  -5   0  530.35   27.60
   0  -5   0    9.90    0.80
   5   0   0   12.80    1.00
   0  -5   0    9.40    0.80
  -1  -5   0  527.95   27.40
   5  -1   0  510.45   26.00
   5  -2   0   25.60    1.80
   2   5   0   30.10    1.90
  -2  -5   0   31.00    1.80
   5  -3   0   13.60    1.20
   3   5   0   14.90    1.30
   5  -4   0   68.99    4.00
   5  -4   0   66.59    3.40
   4   5   0   74.49    4.00
   5   5   0   51.79    3.40
   5   5   0   58.49    3.90
   5  -5   0   57.19    3.30
   5  -6   0    1.80    0.70
   6   5   0    2.30    0.90
   4  -6   0   22.80    1.60
   6   4   0   19.70    1.80
   6   3   0   77.69    4.70
   3  -6   0   84.59    4.60
   6   2   0   51.29    2.60
   6   2   0   51.79    3.10
   2  -6   0   52.59    2.70
   2  -6   0   46.90    2.90
   1  -6   0   79.49    3.90
   1  -6   0   80.79    4.40
   6   1   0   69.99    4.40
   6   1   0   81.19    3.80
   6   0   0  649.43   33.20
   6   0   0  654.23   29.80
   0  -6   0  680.63   34.90
  -1  -6   0   71.09    3.90
   6  -1   0   67.29    3.40
   6  -2   0   50.39    2.60
  -2  -6   0   53.69    3.00
   6  -3   0   89.99    4.90
   6  -3   0   82.89    4.10
  -3  -6   0   84.19    4.80
   3   6   0   86.49    4.80
   6  -4   0   28.60    2.00
  -4  -6   0   25.10    1.80
   6  -4   0   29.10    1.60
   4   6   0   26.40    2.00
   5   6   0    2.30    0.90
   6  -5   0    4.20    0.90
   6  -6   0    4.00    0.90
   6   6   0    2.50    1.00
   6  -7   0   74.59    3.60
   7   6   0   80.79    3.70
   6  -7   0   78.59    3.80
   7   6   0   76.99    4.80
   6  -7   0   74.69    3.60
   6  -7   0   81.69    4.70
   5  -7   0  144.99    8.20
   5  -7   0  142.59    6.50
   7   5   0  158.28    8.30
   7   4   0   35.40    2.60
   4  -7   0   34.00    2.30
   7   3   0   47.80    3.10
   3  -7   0   45.70    2.90
   7   2   0    4.20    0.70
   2  -7   0    5.50    0.80
   7   2   0    2.20    0.90
   7   1   0   61.69    3.10
   7   1   0   57.09    3.70
   1  -7   0   64.59    3.60
   7   0   0  248.68   13.30
   7   0   0  253.37   11.80
   0  -7   0  268.47   13.80
   7  -1   0   56.69    3.00
  -1  -7   0   59.89    3.40
   7  -2   0    5.90    0.70
  -2  -7   0    5.70    0.80
  -3  -7   0   47.20    2.80
   7  -3   0   45.20    2.40
   4   7   0   32.30    2.50
   7  -4   0   37.10    2.50
   7  -4   0   33.50    2.00
  -4  -7   0   37.60    2.30
   7  -5   0  150.18    8.30
   5   7   0  143.39    8.10
   7  -6   0   79.19    4.60
   7  -6   0   75.29    3.70
   7  -6   0   77.09    3.50
   7  -6   0   73.09    3.50
   6   7   0   76.99    4.70
   7  -6   0   77.99    3.70
   7   7   0   40.30    2.30
   7  -7   0   47.20    2.30
   7  -7   0   44.90    2.30
   7  -7   0   46.00    2.30
   7  -7   0   49.40    2.30
   7   7   0   36.70    3.20
   7   7   0   45.00    2.30
   7  -7   0   46.70    3.10
   7  -8   0    8.20    1.30
   8   7   0    5.40    0.70
   7  -8   0    6.80    0.80
   8   7   0    5.90    0.70
   7  -8   0    8.20    0.90
   7  -8   0    6.40    0.80
   7  -8   0    7.10    0.90
   8   6   0   10.50    1.00
   6  -8   0   11.20    1.00
   6  -8   0   11.10    1.00
   6  -8   0    8.90    1.40
   6  -8   0   11.60    1.10
   6  -8   0   10.10    1.00
   8   6   0    8.80    1.60
   8   5   0    0.00    0.90
   5  -8   0    1.90    0.50
   8   5   0    2.10    0.60
   5  -8   0    0.40    0.50
   5  -8   0    0.50    0.70
   5  -8   0    1.10    0.50
   5  -8   0    0.60    0.50
   4  -8   0   55.89    2.70
   8   4   0   57.49    3.80
   4  -8   0   55.19    3.50
   4  -8   0   53.49    2.70
   8   4   0   60.69    2.70
   4  -8   0   52.69    2.70
   3  -8   0   16.60    1.10
   3  -8   0   15.60    1.50
   8   3   0   16.10    1.80
   8   2   0  176.28    8.20
   8   2   0  172.48    9.40
   2  -8   0  169.38    9.50
   8   1   0   18.30    1.30
   1  -8   0   13.70    1.30
   8   1   0   16.60    1.70
   8   0   0   29.40    1.80
   0  -8   0   33.00    2.10
  -1  -8   0   17.60    1.30
   8  -1   0   14.90    1.20
   8  -2   0  167.78    8.00
  -2  -8   0  174.38    9.30
  -3  -8   0   14.90    1.00
  -3  -8   0   13.80    1.30
   8  -3   0   16.00    1.20
   8  -4   0   49.20    2.70
   8  -4   0   54.59    2.50
   8  -5   0    0.50    0.50
   8  -5   0    0.30    0.50
   8  -5   0    1.00    0.50
   8  -5   0    1.10    0.50
   8  -6   0   10.20    1.00
   8  -6   0   11.50    1.10
   8  -6   0   10.00    1.00
   8  -6   0   10.20    0.90
   8  -7   0    7.10    0.70
   7   8   0    5.20    0.70
   8  -7   0    7.10    0.70
   8  -7   0    6.60    0.90
   8  -7   0    5.50    0.70
   7   8   0    6.50    0.80
   8  -8   0   -0.30    0.50
   8   8   0   -0.40    0.40
   8  -8   0    0.70    0.50
   8  -8   0   -0.30    0.40
   8   8   0   -0.20    0.50
   8  -9   0    3.60    0.60
   8  -9   0    4.40    0.60
   9   8   0    4.00    0.60
   7  -9   0   33.90    1.90
   9   7   0   36.50    1.90
   7  -9   0   37.20    2.00
   6  -9   0    0.30    0.50
   6  -9   0   -0.50    0.50
   9   6   0    0.50    0.50
   9   5   0    0.40    0.50
   5  -9   0    0.20    0.50
   5  -9   0    0.10    0.50
   5  -9   0    0.20    0.70
   4  -9   0    4.10    0.60
   4  -9   0    5.00    1.00
   4  -9   0    3.70    0.70
   9   4   0    4.70    0.70
   9   4   0    1.20    1.00
   4  -9   0    4.30    0.60
   3  -9   0    3.70    0.60
   9   3   0    4.40    0.60
   3  -9   0    4.40    0.60
   9   3   0    3.10    1.10
   3  -9   0    3.50    0.90
   3  -9   0    4.30    0.70
   2  -9   0   16.10    1.50
   9   2   0   16.80    1.10
   2  -9   0   15.30    1.10
   9   2   0   16.20    1.80
   2  -9   0   15.90    1.10
   1  -9   0   13.50    1.00
   1  -9   0   13.50    1.00
   9   1   0   15.50    1.10
   1  -9   0   13.20    1.30
   9   1   0   16.20    1.30
   0  -9   0  183.38    7.80
   9   0   0  173.58    8.40
   0  -9   0  170.88    9.70
   9   0   0  183.78    7.80
   9  -1   0   12.50    1.00
  -1  -9   0   13.60    0.90
  -1  -9   0   14.70    1.30
   9  -1   0   12.40    1.00
   9  -1   0   10.90    1.10
  -2  -9   0   14.50    1.00
   9  -2   0   14.60    1.10
  -2  -9   0   13.80    1.30
   9  -2   0   12.70    1.20
   9  -2   0   14.50    1.10
   9  -3   0    3.60    0.60
  -3  -9   0    3.70    0.50
   9  -3   0    3.90    0.60
   9  -3   0    3.20    0.70
   9  -4   0    4.20    0.70
   9  -4   0    4.60    0.60
   9  -5   0    0.10    0.50
   9  -5   0   -0.20    0.50
   9  -5   0    0.10    0.40
   9  -6   0    0.10    0.50
   9  -6   0    0.80    0.50
   9  -6   0    0.40    0.40
   9  -6   0    0.50    0.50
   6   9   0   -0.20    0.50
   9  -7   0   36.20    1.80
   7   9   0   37.50    1.90
   7   9   0   34.70    1.90
   9  -7   0   36.90    1.90
   9  -7   0   34.00    1.90
   9  -8   0    3.80    0.50
   8   9   0    3.80    0.60
   8   9   0    3.60    0.60
   9  -8   0    3.40    0.60
   9  -9   0   20.30    1.20
   9   9   0   19.50    1.10
   8 -10   0    1.00    0.50
  10   8   0    0.50    0.40
   8 -10   0   -0.10    0.40
   7 -10   0    1.30    0.50
   7 -10   0    1.60    0.50
  10   7   0    1.50    0.50
  10   6   0    4.40    0.60
   6 -10   0    4.40    0.70
   6 -10   0    4.10    0.60
   5 -10   0    3.90    0.70
   5 -10   0    3.50    0.60
  10   5   0    4.70    0.60
   4 -10   0   28.40    1.60
  10   4   0   28.90    1.60
   4 -10   0   29.50    1.70
   4 -10   0   27.90    1.70
  10   3   0   12.10    1.00
   3 -10   0   12.80    1.00
   3 -10   0   12.20    1.10
   3 -10   0   11.20    1.40
   3 -10   0   12.90    1.10
   2 -10   0    0.50    0.50
  10   2   0    0.90    0.50
   2 -10   0    0.60    0.70
   2 -10   0   -0.40    0.40
   1 -10   0   34.90    1.90
  10   1   0   34.70    1.90
   1 -10   0   36.60    1.90
   1 -10   0   37.50    2.50
  10   1   0   35.90    1.90
  10   0   0   -0.10    0.50
   0 -10   0    0.60    0.60
  10   0   0    0.30    0.50
  10   0   0    0.60    0.70
   0 -10   0    0.20    0.50
  10  -1   0   34.90    2.10
  10  -1   0   35.30    1.90
  -1 -10   0   35.10    1.80
  10  -1   0   35.80    1.90
  -2 -10   0    0.10    0.40
  10  -2   0    0.00    0.50
  10  -2   0    0.10    0.60
  10  -2   0    0.70    0.50
  10  -3   0   14.50    1.10
  10  -3   0   12.80    1.00
  -3 -10   0   11.30    0.90
  10  -3   0   11.80    1.20
  10  -4   0   29.20    1.70
  10  -4   0   27.70    1.60
  10  -5   0    5.00    0.70
  10  -5   0    4.10    0.60
  10  -6   0    4.00    0.60
  10  -6   0    4.10    0.50
   6  10   0    3.70    0.60
   6  10   0    3.60    0.60
  10  -6   0    4.00    0.70
  10  -7   0    2.00    0.50
   7  10   0    1.40    0.50
  10  -7   0    1.80    0.50
  10  -7   0    2.00    0.40
   7  10   0    0.90    0.50
   8  10   0    0.00    0.40
   8  10   0    0.10    0.40
  10  -8   0    0.50    0.40
  10  -8   0   -0.80    0.40
   7 -11   0    0.50    0.40
  11   7   0    0.10    0.40
   6 -11   0    0.80    0.40
  11   6   0    0.80    0.40
  11   5   0   13.60    1.00
   5 -11   0   15.40    1.00
   4 -11   0    3.50    0.60
  11   4   0    3.10    0.50
   3 -11   0   27.60    1.60
   3 -11   0   29.80    1.60
  11   3   0   27.70    1.60
   2 -11   0    1.90    0.50
   2 -11   0    2.70    0.60
  11   2   0    2.10    0.50
   1 -11   0   39.60    2.10
  11   1   0   42.30    2.10
  11   1   0   40.50    2.10
  11   0   0    0.90    0.50
  11   0   0    0.30    0.50
   0 -11   0    0.20    0.40
  11  -1   0   41.60    2.10
  -1 -11   0   41.20    2.10
  11  -1   0   40.70    2.10
  11  -1   0   40.30    2.40
  11  -2   0    2.50    0.70
  11  -2   0    2.10    0.50
  -2 -11   0    1.80    0.50
  11  -2   0    2.10    0.50
  11  -3   0   28.70    1.50
  11  -3   0   28.90    1.60
  -3 -11   0   27.80    1.50
  11  -4   0    3.20    0.50
  11  -4   0    2.30    0.50
  11  -5   0   14.80    1.00
   5  11   0   12.10    1.00
  11  -5   0   14.40    1.10
   6  11   0   -0.40    0.40
  11  -6   0    0.50    0.50
   6  11   0    0.70    0.40
  11  -6   0    0.60    0.40
  11  -7   0    0.60    0.40
   7  11   0    0.60    0.30
   7  11   0    0.60    0.30
  11  -7   0    0.60    0.30
  12   6   0   -0.10    0.30
   6 -12   0    0.70    0.30
  12   5   0   -0.10    0.30
   5 -12   0    0.40    0.40
  12   4   0    2.40    0.40
   4 -12   0    1.70    0.40
  12   3   0    6.40    0.70
   3 -12   0    6.00    0.70
   2 -12   0    1.50    0.50
  12   2   0    0.90    0.40
   2 -12   0    0.60    0.50
   1 -12   0    1.20    0.50
  12   1   0    1.30    0.40
  12   1   0    1.90    0.50
  12   0   0   -0.20    0.40
   0 -12   0    0.50    0.40
  12   0   0    0.60    0.40
  -1 -12   0    1.00    0.50
  12  -1   0    0.60    0.40
  12  -1   0    0.80    0.50
  -2 -12   0    1.00    0.40
  12  -2   0    0.60    0.40
  12  -2   0    0.60    0.50
  -3 -12   0    6.80    0.70
  12  -3   0    5.30    0.60
  12  -3   0    6.90    0.80
  12  -4   0    1.80    0.40
  12  -4   0    2.00    0.50
   5  12   0    0.50    0.40
   5  12   0   -0.70    0.30
  12  -5   0    0.20    0.40
  12  -5   0   -0.10    0.30
   6  12   0    0.60    0.30
  12  -6   0    0.40    0.40
  13   3   0    0.70    0.30
  13   2   0    0.60    0.30
  13   1   0    6.00    0.60
  13   0   0   10.60    0.80
  13   0   0   13.00    0.80
   0 -13   0   12.20    0.90
  -1 -13   0    7.70    0.70
  13  -1   0    6.80    0.60
  13  -1   0    7.50    0.70
  13  -2   0    0.30    0.40
  13  -2   0    0.20    0.30
  13  -3   0    0.50    0.40
   3  13   0    0.60    0.30
   4  13   0    0.20    0.30
   1   0  -1  632.34   27.70
   0  -1  -1  637.24   27.70
   0  -1   1  624.74   27.70
   1   0   1  616.64   34.90
   1  -1  -1   88.19    4.10
   1  -1   1   89.09    4.10
   1  -2  -1 1763.72   76.59
   1  -2   1 1709.33   76.49
   0  -2  -1 4239.68  189.38
   2   0  -1 4165.48  238.38
   2   0  -1 4442.16  189.28
   0  -2   1 4324.07  189.28
   2   0   1 4299.67  238.58
  -1  -2  -1 1670.23   74.19
   2  -1  -1 1674.03   74.29
   2  -1   1 1710.73   74.29
   2  -2  -1  841.42   37.40
   2  -2   1  849.52   37.40
   3   2  -1  406.16   20.00
   2  -3  -1  395.56   17.80
   3   2   1  403.56   20.00
   2  -3   1  394.86   17.80
   1  -3  -1  918.11   41.00
   3   1  -1  917.01   51.59
   3   1   1  947.81   51.69
   1  -3   1  928.01   41.00
   3   0  -1  121.59    6.90
   3   0  -1  123.69    5.50
   0  -3  -1  119.89    5.50
   3   0   1  120.89    6.90
   0  -3   1  118.19    5.50
   3  -1  -1  974.60   42.40
  -1  -3  -1  955.00   42.40
   3  -1   1  960.40   42.40
  -1  -3   1  952.30   42.40
  -2  -3  -1  381.56   17.40
   3  -2  -1  400.16   17.50
   2   3  -1  391.96   19.70
   3  -2   1  399.36   17.50
   3  -3  -1   16.30    1.10
   3   3  -1   15.60    1.20
   3  -3   1   14.50    1.00
   3   3   1   15.60    1.20
   3  -4  -1  146.99    7.10
   4   3  -1  155.58    8.00
   3  -4  -1  153.48    8.30
   4   3   1  156.28    8.00
   4   3   1  155.98    9.00
   3  -4   1  154.28    8.30
   2  -4  -1  140.49    7.20
   4   2  -1  129.29    7.70
   2  -4  -1  125.59    6.20
   4   2  -1  127.69    6.90
   4   2   1  141.49    7.00
   4   2   1  150.38    7.80
   2  -4   1  121.69    6.10
   2  -4   1  131.29    7.20
   4   1  -1  114.79    7.30
   1  -4  -1  118.49    5.80
   4   1  -1  123.39    6.60
   4   1   1  132.39    7.40
   4   1   1  140.59    6.60
   1  -4   1  135.19    5.90
   4   0  -1  875.21   49.80
   0  -4  -1  904.71   39.60
   4   0  -1  911.31   44.50
   4   0   1  914.41   44.50
   0  -4   1  886.01   39.60
   4   0   1  878.31   49.80
  -1  -4  -1  133.39    6.30
   4  -1  -1  148.39    6.40
   4  -2  -1  139.69    7.20
   4  -2  -1  130.89    6.10
   2   4  -1  135.99    6.90
   4  -2   1  127.59    7.20
   2   4   1  135.19    6.90
   4  -2   1  131.79    6.20
   3   4  -1  150.78    7.70
   4  -3  -1  151.48    6.80
   4  -3  -1  154.88    8.00
   4  -3   1  135.99    6.80
   3   4   1  147.89    7.70
   4  -3   1  144.89    8.00
   4  -4  -1  311.27   13.80
   4  -4  -1  305.97   16.20
   4   4  -1  298.97   15.50
   4  -4   1  305.97   13.80
   4  -4   1  321.17   16.20
   4   4   1  284.57   15.50
   5   4  -1   24.90    2.00
   4  -5  -1   20.10    1.50
   5   4  -1   25.40    1.80
   4  -5  -1   21.50    1.50
   5   4   1   22.90    2.00
   5   4   1   20.90    1.70
   4  -5   1   22.60    1.60
   5   3  -1   96.69    5.30
   3  -5  -1   89.39    5.30
   5   3  -1   90.49    4.60
   3  -5  -1   97.49    4.70
   5   3  -1   96.09    5.90
   3  -5   1  101.19    5.40
   3  -5   1  106.09    4.80
   5   3   1  102.89    5.40
   5   3   1   96.79    5.90
   2  -5  -1  401.06   18.10
   2  -5  -1  411.86   21.30
   5   2  -1  421.36   20.40
   5   2   1  389.86   20.40
   5   2   1  384.06   22.80
   2  -5   1  409.66   18.10
   2  -5   1  404.26   21.30
   1  -5  -1  468.45   23.70
   1  -5  -1  447.46   20.10
   5   1  -1  448.96   22.60
   5   1   1  442.66   22.60
   5   1   1  411.06   25.20
   1  -5   1  463.35   20.10
   1  -5   1  459.35   23.70
   0  -5  -1    1.60    0.40
   0  -5  -1    1.90    0.50
   5   0  -1    1.10    0.50
   5   0   1    1.80    0.60
   0  -5   1    2.00    0.50
   0  -5   1    1.70    0.40
   5  -1  -1  441.76   22.40
  -1  -5  -1  442.66   23.50
   1   5  -1  444.46   22.30
   5  -1   1  447.16   22.40
  -1  -5   1  451.35   23.50
   2   5  -1  402.86   20.20
   5  -2  -1  388.76   18.00
  -2  -5  -1  429.16   21.20
   5  -2  -1  387.76   21.30
   2   5   1  393.16   20.20
   5  -2   1  392.26   21.30
  -2  -5   1  411.36   21.20
   5  -3  -1  105.79    5.00
   5  -3  -1  104.79    5.70
   3   5  -1  107.59    5.60
   3   5   1   99.59    5.60
   5  -3   1   99.39    5.70
   5  -4  -1   19.10    1.20
   5  -4  -1   17.70    1.50
   5  -4  -1   19.80    1.40
   4   5  -1   20.10    1.60
   4   5   1   22.40    1.70
   5  -4   1   22.70    1.50
   5   5  -1    4.00    0.90
   5  -5  -1    3.40    0.60
   5  -5  -1    4.80    0.80
   5  -5   1    3.90    0.80
   5   5   1    5.20    1.10
   5   5   1    2.90    0.90
   5  -6  -1   87.59    4.80
   6   5  -1   79.99    4.90
   5  -6   1   78.89    4.80
   6   5   1   82.79    4.90
   6   4  -1  190.18   10.50
   4  -6  -1  204.68   10.80
   4  -6   1  200.88   10.80
   6   4   1  199.28   10.50
   6   3  -1   28.30    2.10
   3  -6  -1   29.30    1.90
   3  -6  -1   29.80    2.00
   3  -6   1   34.50    2.00
   6   3   1   27.00    2.10
   2  -6  -1   28.70    1.80
   2  -6  -1   29.60    1.80
   6   2  -1   29.40    1.60
   6   2  -1   27.40    2.00
   6   2   1   22.80    1.90
   2  -6   1   27.60    1.80
   6   2   1   24.30    1.60
   6   1  -1  668.03   33.10
   1  -6  -1  668.13   29.40
   1  -6  -1  612.94   34.70
   6   1  -1  699.63   29.70
   6   1   1  656.93   33.10
   1  -6   1  667.43   34.80
   6   1   1  641.44   29.70
   6   0  -1   65.09    4.20
   6   0  -1   79.39    3.70
   0  -6  -1   78.69    4.20
   0  -6   1   78.69    4.20
   6   0   1   69.69    4.20
   6   0   1   76.89    3.60
  -1  -6  -1  699.13   36.20
   6  -1  -1  673.53   30.90
  -1  -6   1  698.83   36.20
   6  -1   1  681.43   34.40
   6  -1   1  678.03   30.90
   6  -2  -1   26.00    1.50
  -2  -6  -1   25.90    1.70
   6  -2   1   29.20    1.50
  -2  -6   1   27.50    1.70
  -3  -6  -1   32.70    1.90
   6  -3  -1   30.60    1.70
   3   6  -1   30.10    2.10
   6  -3  -1   30.70    2.00
   3   6   1   32.20    2.10
   6  -3   1   28.10    2.00
   6  -3   1   31.10    1.70
  -3  -6   1   26.80    1.90
  -4  -6  -1  208.08   10.50
   6  -4  -1  192.78    9.00
   4   6  -1  193.98   10.30
   6  -4  -1  201.78   10.60
   6  -4   1  185.38   10.60
   4   6   1  195.08   10.20
   6  -4   1  184.28    9.00
   5   6  -1   77.49    4.70
   6  -5  -1   81.39    4.70
   5   6   1   82.59    4.80
   5   6   1   83.89    5.40
   6  -5   1   79.09    4.70
   6   6  -1   21.20    2.00
   6  -6  -1   20.70    1.70
   6  -6   1   19.80    1.70
   6   6   1   17.40    1.90
   7   6  -1   14.90    1.90
   6  -7  -1   18.20    1.70
   6  -7  -1   19.00    1.20
   6  -7  -1   16.40    1.30
   7   6  -1   16.80    1.30
   6  -7  -1   16.80    1.20
   6  -7   1   16.90    1.20
   7   6   1   15.90    1.30
   7   6   1   15.70    2.00
   6  -7   1   18.60    1.30
   6  -7   1   18.80    1.70
   6  -7   1   18.50    1.20
   7   5  -1   22.60    2.00
   5  -7  -1   19.80    1.70
   5  -7  -1   19.20    1.20
   7   5   1   22.10    2.10
   5  -7   1   20.10    1.70
   5  -7   1   17.40    1.20
   7   4  -1   66.49    4.10
   4  -7  -1   67.09    3.90
   7   4   1   65.39    4.10
   4  -7   1   62.69    3.90
   7   3  -1    6.70    1.20
   3  -7  -1    6.00    1.00
   3  -7   1    8.00    1.00
   7   3   1    5.90    1.10
   2  -7  -1  149.49    7.90
   7   2  -1  140.29    6.80
   7   2  -1  135.29    7.80
   2  -7   1  148.19    7.90
   7   2   1  135.79    7.80
   7   2   1  149.79    6.80
   7   1  -1   42.90    2.90
   1  -7  -1   47.80    2.70
   7   1  -1   44.80    2.40
   1  -7   1   49.10    2.70
   7   1   1   41.00    2.90
   7   1   1   44.50    2.40
   0  -7  -1    1.30    0.50
   7   0  -1    0.50    0.70
   7   0  -1    0.90    0.40
   7   0   1    1.40    0.50
   7   0   1    0.40    0.70
   0  -7   1    1.40    0.50
  -1  -7  -1   50.59    2.90
   7  -1  -1   46.30    2.50
  -1  -7   1   48.00    2.90
   7  -1   1   47.20    2.50
  -2  -7  -1  135.29    6.70
  -2  -7  -1  143.09    7.70
   7  -2  -1  144.19    6.60
  -2  -7   1  139.99    7.70
   7  -2   1  141.19    6.60
   7  -3  -1    6.80    0.80
  -3  -7  -1    7.30    0.90
   7  -3   1    5.80    0.80
  -3  -7   1    6.70    0.90
   7  -4  -1   62.99    3.20
   7  -4  -1   65.59    3.90
   4   7  -1   64.49    3.90
  -4  -7   1   61.89    3.70
   4   7   1   64.59    4.00
   7  -4   1   65.99    3.90
   5   7  -1   20.80    2.00
   7  -5  -1   19.90    1.80
  -5  -7   1   21.20    1.60
   5   7   1   22.30    2.00
   7  -5   1   22.40    1.80
   7  -6  -1   15.30    1.10
   6   7  -1   16.40    1.90
   7  -6  -1   16.20    1.70
   7  -6  -1   15.70    1.20
   7  -6  -1   16.90    1.20
   6   7   1   15.60    1.90
   7  -6   1   16.90    1.20
   7  -6   1   16.90    1.30
   7  -6   1   19.20    1.20
   7  -6   1   17.20    1.20
   7  -6   1   18.10    1.70
   7  -7  -1    6.10    0.70
   7  -7  -1    5.80    0.70
   7  -7  -1    5.00    0.70
   7   7  -1    7.00    1.40
   7  -7  -1    5.60    1.10
   7   7  -1    7.40    0.80
   7  -7  -1    5.50    0.70
   7   7  -1    7.20    0.90
   7  -7   1    5.90    0.70
   7   7   1    8.20    0.90
   7  -7   1    6.40    1.20
   7  -7   1    6.10    0.70
   7  -7   1    5.80    0.70
   7   7   1    5.70    1.30
   7   7   1    5.90    0.80
   7  -7   1    5.60    0.70
   7  -8  -1    1.50    0.90
   8   7  -1    2.00    0.60
   7  -8  -1    1.10    0.50
   7  -8  -1    1.10    0.50
   7  -8  -1    1.30    0.50
   7  -8  -1    1.30    0.60
   7  -8   1    1.00    0.50
   8   7   1    0.40    0.50
   7  -8   1    1.50    0.50
   7  -8   1    1.10    0.80
   7  -8   1    1.50    0.50
   8   7   1    1.90    0.60
   7  -8   1    1.90    0.60
   6  -8  -1   15.90    1.20
   6  -8  -1   16.00    1.10
   6  -8  -1   16.90    1.30
   6  -8  -1   16.90    1.70
   8   6  -1   18.70    2.00
   6  -8  -1   16.70    1.20
   8   6  -1   19.00    1.30
   8   6   1   14.40    1.20
   6  -8   1   14.60    1.20
   6  -8   1   14.80    1.70
   6  -8   1   15.30    1.20
   8   6   1   16.20    1.90
   6  -8   1   16.20    1.20
   6  -8   1   18.40    1.30
   8   5  -1   50.99    3.50
   5  -8  -1   48.60    2.50
   5  -8  -1   47.90    2.40
   8   5  -1   54.29    2.50
   5  -8  -1   50.79    2.60
   5  -8  -1   49.40    2.40
   5  -8  -1   52.49    3.20
   5  -8   1   47.60    2.50
   5  -8   1   47.30    2.60
   5  -8   1   49.40    2.40
   8   5   1   47.80    3.50
   5  -8   1   43.70    2.40
   5  -8   1   48.50    2.50
   8   5   1   54.09    2.50
   5  -8   1   49.70    3.20
   4  -8  -1   25.40    1.40
   4  -8  -1   25.30    1.90
   4  -8  -1   25.60    1.40
   4  -8  -1   19.90    1.50
   8   4  -1   28.90    2.40
   8   4  -1   29.30    1.50
   8   4   1   21.80    2.20
   4  -8   1   23.20    1.40
   4  -8   1   23.90    1.40
   8   4   1   26.40    1.50
   4  -8   1   22.00    1.50
   4  -8   1   27.70    2.00
   3  -8  -1   19.30    1.20
   8   3  -1   18.90    1.90
   3  -8  -1   19.80    1.50
   3  -8   1   16.00    1.10
   8   3   1   17.70    1.90
   3  -8   1   15.60    1.50
   8   2  -1    9.20    1.00
   8   2  -1    8.90    1.40
   2  -8   1    8.90    1.10
   8   2   1    8.00    1.30
   8   2   1    8.90    1.10
   8   1  -1   16.70    1.60
   8   1  -1   15.40    1.20
   1  -8  -1   15.50    1.30
   8   1   1   14.90    1.20
   8   1   1   15.10    1.60
   1  -8   1   13.30    1.30
   0  -8  -1    7.90    1.00
   8   0  -1    7.80    0.90
   0  -8   1    8.60    0.90
   8   0   1    9.00    0.90
   8  -1  -1   14.60    1.20
  -1  -8  -1   14.50    1.30
   8  -1   1   18.30    1.20
  -1  -8   1   15.70    1.30
  -2  -8  -1    8.40    1.00
   8  -2  -1    8.60    1.00
  -2  -8   1    7.60    1.00
   8  -2   1    8.70    0.90
   8  -3  -1   19.10    1.30
  -3  -8  -1   14.80    1.10
  -3  -8   1   18.50    1.10
   8  -3   1   17.90    1.30
  -3  -8   1   18.20    1.40
   8  -4  -1   23.60    1.60
   8  -4  -1   24.70    1.40
  -4  -8   1   24.10    1.80
   8  -4   1   27.10    1.50
   8  -5  -1   46.60    2.40
   8  -5  -1   46.50    2.30
   8  -5  -1   43.80    2.40
   8  -5  -1   48.90    2.40
   8  -5   1   49.60    2.40
   8  -5   1   46.20    2.40
   8  -5   1   50.49    2.30
   8  -5   1   45.40    2.40
   8  -6  -1   14.90    1.20
   6   8  -1   15.60    1.80
   8  -6  -1   16.20    1.10
   8  -6  -1   14.40    1.10
   8  -6  -1   13.10    1.10
   8  -6   1   15.20    1.10
   8  -6   1   13.50    1.10
   8  -6   1   15.30    1.20
   8  -6   1   16.70    1.10
   8  -7  -1    1.20    0.50
   8  -7  -1    1.40    0.50
   8  -7  -1    1.20    0.50
   7   8  -1    0.80    0.60
   8  -7  -1    1.40    0.50
   7   8  -1    1.00    0.50
   8  -7   1    1.60    0.50
   7   8   1    0.40    0.50
   7   8   1    1.70    0.60
   8  -7   1    0.80    0.50
   8  -7   1    0.90    0.50
   8  -7   1    1.30    0.50
   8  -8  -1   -0.40    0.40
   8  -8  -1    0.40    0.50
   8  -8  -1    0.50    0.50
   8   8  -1    0.50    0.50
   8   8  -1   -0.50    0.50
   8   8   1    0.10    0.50
   8  -8   1    0.30    0.50
   8   8   1   -0.50    0.50
   8  -8   1    0.00    0.40
   8  -8   1    0.20    0.50
   8  -8   1    1.10    0.50
   8  -9  -1    8.50    0.80
   9   8  -1    9.20    0.90
   8  -9  -1    9.70    0.90
   8  -9   1    7.70    0.80
   9   8   1    8.00    0.80
   8  -9   1    9.40    0.90
   7  -9  -1    2.20    0.60
   7  -9  -1    2.50    0.60
   9   7  -1    2.00    0.60
   7  -9   1    1.80    0.60
   7  -9   1    2.10    0.50
   9   7   1    2.60    0.60
   6  -9  -1    1.60    0.50
   9   6  -1    1.60    0.60
   6  -9  -1    1.40    0.60
   9   6   1    1.80    0.60
   6  -9   1    1.40    0.60
   6  -9   1    1.00    0.50
   9   5  -1    8.90    1.00
   5  -9  -1    8.50    1.00
   5  -9  -1    9.60    1.00
   5  -9  -1   10.90    1.40
   5  -9   1   11.50    1.40
   5  -9   1   11.90    1.00
   9   5   1   11.90    1.10
   5  -9   1   10.30    1.00
   4  -9  -1   -0.20    0.50
   4  -9  -1    0.90    0.70
   4  -9  -1    0.30    0.50
   9   4  -1    0.60    0.90
   9   4  -1    1.00    0.50
   4  -9  -1    0.60    0.50
   4  -9   1    0.30    0.50
   4  -9   1    0.40    0.50
   9   4   1    1.20    0.60
   9   4   1   -0.40    0.80
   4  -9   1    0.60    0.50
   4  -9   1    0.70    0.70
   3  -9  -1   14.20    1.10
   9   3  -1   15.20    1.10
   3  -9  -1   14.80    1.10
   3  -9  -1   15.10    1.50
   3  -9  -1   12.90    1.00
   9   3  -1   12.60    1.80
   9   3   1   14.70    1.80
   3  -9   1   13.50    1.10
   9   3   1   13.70    1.10
   3  -9   1   13.60    1.10
   3  -9   1   15.20    1.50
   3  -9   1   13.60    1.00
   2  -9  -1   31.60    1.70
   9   2  -1   35.10    1.70
   9   2  -1   34.10    2.60
   2  -9  -1   30.40    1.70
   2  -9  -1   28.90    2.20
   9   2   1   30.50    2.50
   2  -9   1   30.90    1.70
   9   2   1   30.50    1.70
   2  -9   1   32.00    2.20
   2  -9   1   28.00    1.60
   9   1  -1   36.00    2.00
   1  -9  -1   41.60    2.00
   1  -9  -1   40.50    2.50
   9   1  -1   35.30    2.20
   1  -9  -1   38.50    2.00
   9   1   1   39.00    2.30
   9   1   1   38.00    2.90
   1  -9   1   40.00    2.60
   1  -9   1   36.70    1.90
   1  -9   1   38.80    1.90
   9   1   1   40.90    2.00
   9   0  -1   10.30    1.10
   0  -9  -1   10.20    0.90
   9   0  -1   10.90    0.90
   0  -9  -1    8.70    1.10
   0  -9   1    9.90    1.20
   9   0   1   10.40    1.10
   0  -9   1   11.40    0.90
   9   0   1   13.60    1.00
  -1  -9  -1   38.20    1.90
  -1  -9  -1   36.10    2.40
   9  -1  -1   39.30    2.00
   9  -1  -1   41.00    2.20
   9  -1  -1   39.10    1.90
   9  -1   1   36.00    2.00
   9  -1   1   37.60    1.90
  -1  -9   1   38.40    1.90
   9  -1   1   34.90    2.20
  -1  -9   1   38.30    2.50
   9  -2  -1   26.60    1.80
   9  -2  -1   29.50    1.70
  -2  -9  -1   27.50    1.50
   9  -2  -1   25.50    1.50
   9  -2   1   30.60    1.80
  -2  -9   1   27.70    2.00
   9  -2   1   32.40    1.70
  -2  -9   1   31.20    1.60
   9  -2   1   30.30    1.60
   9  -3  -1   12.20    1.20
  -3  -9  -1   10.80    0.90
   9  -3  -1   14.30    1.10
   9  -3  -1   13.20    1.00
   9  -3   1   14.00    1.10
   9  -3   1   14.20    1.00
   9  -3   1   12.00    1.10
  -3  -9   1   14.30    1.00
   9  -4  -1    1.40    0.60
   9  -4  -1    0.50    0.50
   9  -4  -1    0.90    0.50
   9  -4   1    1.90    0.50
  -4  -9   1    1.60    0.50
   9  -4   1    0.50    0.50
   9  -5  -1    8.80    0.90
   9  -5  -1   11.00    1.00
   9  -5  -1   10.40    0.90
   9  -5   1   10.70    0.90
   9  -5   1   10.70    0.90
   9  -5   1   10.40    1.00
   9  -6  -1    0.60    0.50
   9  -6  -1    0.60    0.40
   9  -6  -1    0.60    0.50
   9  -6  -1    0.60    0.50
   9  -6   1    0.70    0.50
   9  -6   1    0.40    0.50
   9  -6   1    1.40    0.50
   6   9   1    2.30    0.60
   9  -6   1    2.00    0.60
   9  -7  -1    2.70    0.50
   9  -7  -1    2.40    0.50
   7   9  -1    1.80    0.60
   7   9  -1    2.50    0.60
   9  -7   1    1.10    0.50
   9  -7   1    1.90    0.60
   9  -7   1    1.60    0.50
   7   9   1    0.30    0.50
   7   9   1    2.10    0.60
   9  -7   1    1.90    0.50
   9  -8  -1    6.90    0.80
   8   9  -1    7.10    0.80
   9  -8  -1    8.80    0.80
   8   9  -1    7.40    0.80
   9  -8   1    8.80    0.80
   8   9   1    8.60    0.80
   8   9   1    8.70    0.80
   9  -8   1    9.10    0.80
   9   9  -1    1.60    0.40
   9  -9  -1    0.70    0.40
   9   9   1   -0.30    0.40
   9  -9   1    1.40    0.40
   8 -10  -1    0.00    0.40
   8 -10  -1    0.00    0.40
  10   8  -1    0.00    0.40
  10   8   1    0.20    0.40
  10   7  -1    7.70    0.80
   7 -10  -1    8.10    0.90
   7 -10  -1    5.90    0.80
   7 -10   1    7.30    0.80
   7 -10   1    7.80    0.90
  10   7   1    7.00    0.80
   6 -10  -1    5.60    0.70
   6 -10  -1    5.00    0.70
  10   6  -1    4.50    0.60
   6 -10   1    4.00    0.60
  10   6   1    5.40    0.60
   6 -10   1    5.00    0.70
   5 -10  -1    2.90    0.60
   5 -10  -1    2.20    0.50
  10   5  -1    2.00    0.50
  10   5   1    1.20    0.50
   5 -10   1    2.30    0.50
   5 -10   1    1.30    0.60
   4 -10  -1    9.30    1.00
  10   4  -1   10.90    1.00
   4 -10  -1   10.80    1.00
   4 -10  -1   10.50    1.00
   4 -10   1    9.50    1.00
  10   4   1    9.50    1.00
   4 -10   1   10.50    1.00
   4 -10   1    8.30    1.00
   3 -10  -1   30.90    1.70
   3 -10  -1   30.60    2.20
   3 -10  -1   28.70    1.80
  10   3  -1   30.80    1.70
   3 -10  -1   30.60    1.70
  10   3   1   32.00    1.60
   3 -10   1   30.40    2.20
   3 -10   1   29.40    1.70
   3 -10   1   29.80    1.70
   3 -10   1   27.60    1.70
   2 -10  -1   14.70    1.10
   2 -10  -1   14.20    1.40
  10   2  -1   14.40    1.10
   2 -10  -1   13.80    1.10
   2 -10   1   15.80    1.10
   2 -10   1   15.20    1.50
  10   2   1   13.80    1.10
   2 -10   1   12.80    1.10
   1 -10  -1    2.30    0.80
  10   1  -1    2.20    0.50
   1 -10  -1    2.30    0.60
   1 -10  -1    2.50    0.50
  10   1  -1    2.20    0.50
  10   1   1    3.00    0.60
  10   1   1    2.20    0.50
   1 -10   1    2.10    0.50
   1 -10   1    2.40    0.50
   1 -10   1    2.10    0.80
   0 -10  -1    7.70    1.20
  10   0  -1   10.20    1.20
  10   0  -1   10.00    0.90
   0 -10  -1   10.00    0.90
  10   0  -1    8.50    1.00
  10   0   1    9.50    0.90
  10   0   1    8.90    0.90
   0 -10   1   10.50    0.90
  10   0   1   11.30    1.20
   0 -10   1    9.60    1.20
  -1 -10  -1    1.90    0.50
  10  -1  -1    1.80    0.70
  10  -1  -1    2.30    0.60
  10  -1  -1    2.20    0.50
  -1 -10   1    2.90    0.50
  10  -1   1    1.60    0.70
  10  -1   1    2.10    0.50
  -1 -10   1    2.60    0.70
  10  -1   1    1.70    0.50
  10  -2  -1   14.70    1.10
  -2 -10  -1   14.20    1.00
  10  -2  -1   13.40    1.30
  10  -2  -1   13.10    1.00
  -2 -10   1   14.90    1.00
  10  -2   1   13.80    1.30
  10  -2   1   13.60    1.10
  10  -2   1   13.60    1.10
  10  -3  -1   30.40    1.70
  10  -3  -1   29.60    1.90
  10  -3  -1   31.70    1.70
  -3 -10  -1   30.90    1.60
  10  -3   1   28.20    1.90
  10  -3   1   30.10    1.70
  -3 -10   1   31.60    1.60
  10  -3   1   30.40    1.70
  10  -4  -1    8.90    0.90
  10  -4  -1   10.40    1.00
  10  -4   1   10.60    1.00
  10  -4   1   10.50    0.90
  -4 -10   1   10.70    0.90
  10  -5  -1    2.30    0.50
  10  -5  -1    1.30    0.50
  10  -5   1    2.20    0.60
  10  -5   1    1.80    0.50
  10  -6  -1    4.10    0.70
   6  10  -1    5.10    0.60
  10  -6  -1    4.90    0.60
   6  10  -1    5.00    0.70
   6  10   1    5.50    0.60
  10  -6   1    5.50    0.60
   6  10   1    5.30    0.70
  10  -6   1    4.90    0.70
  10  -6   1    5.60    0.60
  10  -7  -1    6.90    0.90
  10  -7  -1    6.60    0.70
  10  -7  -1    8.40    0.80
   7  10  -1    7.00    0.80
   7  10  -1    8.00    0.80
   7  10   1    7.60    0.80
  10  -7   1    7.50    0.70
  10  -7   1    6.20    0.70
   7  10   1    6.30    0.80
  10  -8  -1    0.00    0.40
   8  10  -1   -0.20    0.40
   8  10  -1    0.50    0.40
   8  10   1    0.10    0.40
  10  -8   1   -0.60    0.40
   8  10   1   -0.50    0.40
  11   7  -1    0.20    0.40
   7 -11  -1    0.80    0.40
   7 -11   1    0.60    0.40
  11   7   1    0.30    0.30
  11   6  -1    2.10    0.50
   6 -11  -1    1.80    0.50
  11   6   1    1.90    0.40
   6 -11   1    1.60    0.50
   5 -11  -1    0.70    0.50
  11   5  -1    1.60    0.50
   5 -11  -1    1.50    0.50
   5 -11   1    0.80    0.50
  11   5   1    2.10    0.50
  11   4  -1    1.50    0.50
   4 -11  -1    0.10    0.50
   4 -11  -1    0.80    0.50
   4 -11   1    1.20    0.50
  11   4   1    1.20    0.50
   3 -11  -1    2.50    0.50
   3 -11  -1    2.60    0.60
  11   3  -1    2.70    0.60
  11   3   1    3.10    0.50
   3 -11   1    2.80    0.60
   3 -11   1    1.70    0.60
  11   2  -1    4.40    0.60
   2 -11  -1    2.90    0.60
   2 -11  -1    2.70    0.60
   2 -11   1    3.40    0.60
  11   2   1    4.40    0.60
   2 -11   1    3.80    0.60
   1 -11  -1   17.20    1.10
  11   1  -1   15.40    1.10
   1 -11  -1   12.70    1.10
  11   1  -1   16.60    1.10
  11   1   1   13.60    1.10
  11   1   1   16.30    1.10
   1 -11   1   15.70    1.10
   0 -11  -1    3.00    0.60
  11   0  -1    3.60    0.60
  11   0  -1    5.40    0.70
  11   0   1    5.00    0.70
   0 -11   1    4.10    0.60
  11   0   1    4.70    0.60
  -1 -11  -1   14.20    1.10
  11  -1  -1   14.30    1.10
  11  -1  -1   14.80    1.40
  11  -1  -1   14.20    1.10
  11  -1   1   16.00    1.10
  11  -1   1   14.20    1.10
  -1 -11   1   16.20    1.10
  -2 -11  -1    3.40    0.60
  11  -2  -1    4.00    0.80
  11  -2  -1    4.20    0.60
  11  -2  -1    3.50    0.60
  11  -2   1    2.40    0.50
  -2 -11   1    3.30    0.60
  11  -2   1    3.20    0.80
  11  -2   1    3.50    0.60
  11  -3  -1    1.80    0.50
  11  -3  -1    2.50    0.50
  -3 -11  -1    3.00    0.50
  11  -3  -1    2.10    0.70
  11  -3   1    2.00    0.60
  11  -3   1    2.80    0.50
  -3 -11   1    2.80    0.50
  11  -4  -1    1.20    0.50
  11  -4  -1    1.00    0.50
  11  -4   1    1.50    0.50
  11  -4   1    1.70    0.50
  11  -5  -1    1.10    0.50
  11  -5  -1    1.50    0.40
   5  11   1    1.20    0.50
  11  -5   1    1.40    0.50
  11  -5   1    1.30    0.40
   6  11  -1    2.20    0.50
  11  -6  -1    1.70    0.50
   6  11  -1    1.50    0.50
  11  -6  -1    1.60    0.40
   6  11   1    1.80    0.50
  11  -6   1    1.70    0.40
   6  11   1    2.00    0.50
  11  -6   1    2.20    0.50
   7  11  -1    0.30    0.30
   7  11  -1    0.00    0.30
  11  -7   1    0.00    0.30
   7  11   1   -0.20    0.30
   7  11   1    0.60    0.40
  11  -7   1    0.30    0.40
   6 -12  -1    2.00    0.40
  12   6  -1    2.50    0.40
   6 -12   1    2.10    0.40
  12   6   1    3.60    0.40
  12   5  -1    3.30    0.40
   5 -12  -1    3.70    0.50
  12   5   1    4.40    0.60
   5 -12   1    3.70    0.50
  12   4  -1    2.90    0.50
   4 -12  -1    2.70    0.50
   4 -12   1    2.70    0.50
  12   4   1    3.50    0.50
   3 -12  -1   12.20    0.90
  12   3  -1   12.20    0.90
  12   3   1   11.80    0.90
   3 -12   1   13.10    0.90
   2 -12  -1    4.40    0.60
  12   2  -1    4.30    0.50
   2 -12  -1    3.20    0.50
  12   2   1    3.40    0.50
   2 -12   1    2.60    0.50
   2 -12   1    3.20    0.60
  12   1  -1   21.20    1.30
  12   1  -1   21.20    1.20
   1 -12  -1   22.80    1.30
  12   1   1   21.80    1.20
  12   1   1   20.30    1.30
   1 -12   1   23.70    1.30
  12   0  -1    1.20    0.40
  12   0  -1    1.40    0.40
   0 -12  -1    1.40    0.50
   0 -12   1    0.90    0.50
  12   0   1    0.90    0.50
  12   0   1    1.30    0.40
  -1 -12  -1   21.90    1.30
  12  -1  -1   20.00    1.30
  12  -1  -1   21.30    1.20
  12  -1   1   20.20    1.30
  12  -1   1   20.70    1.20
  -1 -12   1   23.70    1.30
  -2 -12  -1    2.90    0.50
  12  -2  -1    2.80    0.50
  12  -2  -1    3.50    0.60
  -2 -12   1    4.20    0.50
  12  -2   1    4.00    0.50
  12  -2   1    3.30    0.60
  12  -3  -1   13.00    1.00
  -3 -12  -1   13.20    0.90
  12  -3  -1   11.20    0.80
  -3 -12   1   13.60    0.90
  12  -3   1   12.40    0.90
  12  -3   1   12.00    1.00
  12  -4  -1    3.00    0.40
  12  -4  -1    3.70    0.50
  12  -4   1    2.30    0.50
  12  -4   1    2.00    0.40
   4  12   1    3.40    0.50
  12  -5  -1    3.40    0.50
   5  12  -1    5.40    0.60
   5  12  -1    4.20    0.50
  12  -5  -1    3.00    0.40
  12  -5   1    3.20    0.50
  12  -5   1    4.00    0.40
   5  12   1    4.70    0.60
   5  12   1    4.50    0.50
   6  12  -1    1.30    0.30
   6  12   1    2.10    0.40
  12  -6   1    1.20    0.40
  13   3  -1    3.00    0.40
  13   3   1    4.00    0.50
  13   2  -1    1.00    0.30
  13   2   1    1.10    0.30
  13   1  -1    6.00    0.60
  13   1   1    5.50    0.60
  13   0  -1    0.50    0.40
  13   0  -1    0.20    0.30
  13   0   1    0.10    0.40
  13   0   1    0.60    0.30
   0 -13   1    0.00    0.40
  13  -1  -1    5.20    0.60
  -1 -13  -1    6.20    0.60
  13  -1  -1    6.40    0.70
  13  -1   1    5.50    0.60
  13  -1   1    5.60    0.70
  -1 -13   1    5.70    0.60
  13  -2  -1    0.50    0.40
  13  -2  -1    0.30    0.30
  13  -2   1    0.80    0.30
  13  -2   1    1.50    0.40
   3  13  -1    2.90    0.40
  13  -3  -1    2.70    0.40
   3  13   1    3.30    0.40
  13  -3   1    2.90    0.40
   4  13  -1    1.10    0.30
   4  13   1    0.90    0.30
   1   0  -2  632.74   27.70
   1   0   2  618.94   34.90
   1  -1  -2    2.30    0.30
   2   1  -2  320.67   14.10
   1  -2  -2  325.47   14.20
   2   1   2  313.67   17.90
   1  -2   2  318.27   14.20
   2   0  -2  274.27   14.90
   2   0  -2  264.97   11.90
   0  -2  -2  258.87   11.90
   0  -2   2  269.87   11.90
   2   0   2  268.37   15.00
  -1  -2  -2  298.37   13.40
   2  -1  -2  306.07   13.40
   2  -2  -2 1521.15   68.19
   2  -2   2 1571.24   68.19
   3   2  -2 1749.92   82.59
   2  -3  -2 1638.04   73.49
   3   2   2 1681.53   82.59
   3   2   2 1626.44   92.59
   2  -3   2 1635.04   73.49
   3   1  -2  671.23   37.40
   1  -3  -2  693.93   29.80
   1  -3   2  665.63   29.80
   3   1   2  658.33   37.50
   3   0  -2   32.70    1.50
   3   0  -2   30.70    1.90
   0  -3  -2   31.40    1.60
   0  -3   2   31.70    1.60
   3   0   2   30.20    2.00
  -1  -3  -2  675.63   30.90
   3  -1  -2  725.63   31.00
   3  -2  -2 1749.72   72.99
  -2  -3  -2 1574.84   72.89
   2   3  -2 1666.23   81.99
   3  -2   2 1629.44   72.99
   3  -3  -2    8.30    0.80
   3  -3  -2   10.90    0.80
   3   3  -2    9.70    0.90
   3   3   2    9.90    0.90
   3  -3   2    7.90    0.80
   3  -4  -2  336.07   15.50
   3  -4  -2  332.27   18.30
   4   3  -2  331.07   17.50
   3  -4   2  354.36   15.50
   3  -4   2  354.06   18.30
   4   3   2  359.26   19.60
   4   3   2  349.37   17.50
   2  -4  -2  138.29    7.00
   4   2  -2  167.38    7.90
   4   2  -2  152.48    8.70
   2  -4  -2  152.18    8.10
   4   2   2  150.88    8.80
   2  -4   2  149.19    7.00
   4   2   2  159.28    7.90
   2  -4   2  147.79    8.10
   4   1  -2  635.44   34.20
   4   1  -2  660.43   30.60
   1  -4  -2  637.24   27.20
   1  -4   2  552.84   27.20
   4   1   2  628.54   30.60
   4   1   2  560.04   34.20
   4   0  -2  449.76   26.60
   4   0  -2  497.45   21.20
   0  -4  -2  476.85   21.20
   4   0  -2  481.65   23.90
   4   0   2  483.25   23.90
   4   0   2  477.95   26.70
   0  -4   2  477.85   21.20
   1   4  -2  611.44   31.50
   4  -1  -2  646.34   28.10
  -1  -4  -2  605.34   28.00
   4  -1   2  669.53   31.60
   2   4  -2  160.48    8.10
   4  -2  -2  152.58    7.20
   4  -2  -2  159.38    8.40
   4  -2   2  149.29    8.40
   2   4   2  163.08    8.10
   4  -3  -2  353.66   15.80
   3   4  -2  354.86   17.80
   4  -3  -2  353.46   18.70
   4  -3   2  354.56   18.70
   3   4   2  341.37   17.70
   4   4  -2  358.26   17.90
   4  -4  -2  354.16   15.90
   4  -4  -2  354.06   18.70
   4   4   2  351.76   17.90
   4  -4   2  345.07   18.70
   4  -5  -2   51.29    2.90
   4  -5  -2   54.69    3.20
   5   4  -2   53.59    3.70
   4  -5  -2   51.79    2.70
   5   4  -2   55.79    3.30
   5   4   2   61.59    3.80
   5   4   2   56.39    3.30
   4  -5   2   54.49    3.20
   3  -5  -2  224.88    9.80
   5   3  -2  207.48    9.70
   3  -5  -2  207.98   11.30
   5   3  -2  208.78   11.00
   5   3   2  214.48   11.00
   5   3   2  209.38   12.30
   3  -5   2  208.78   11.30
   2  -5  -2   43.60    2.40
   2  -5  -2   50.69    2.60
   5   2  -2   43.50    2.70
   2  -5   2   42.80    2.60
   5   2   2   44.00    3.00
   5   2   2   40.40    2.70
   1  -5  -2   28.20    1.50
   1  -5  -2   30.00    1.60
   5   1  -2   28.20    1.70
   5   1   2   19.60    1.80
   1  -5   2   20.70    1.50
   5   1   2   21.50    1.70
   5   0  -2  188.48    9.70
   0  -5  -2  184.88   10.10
   0  -5  -2  191.88    8.60
   5   0   2  185.88   10.80
   0  -5   2  185.58   10.10
   5   0   2  198.48    9.80
  -1  -5  -2   22.10    1.40
   5  -1  -2   20.70    1.50
   1   5  -2   23.20    1.60
   5  -1  -2   22.20    1.40
   5  -1   2   29.70    1.70
   2   5  -2   42.30    2.60
   5  -2  -2   42.00    2.20
  -2  -5  -2   41.40    2.50
   5  -2  -2   38.80    2.50
   5  -2   2   45.00    2.60
  -2  -5   2   44.00    2.50
   2   5   2   46.30    2.50
   5  -3  -2  214.08    9.80
   3   5  -2  206.88   11.00
   5  -3  -2  219.68   11.50
   5  -3   2  209.88   11.50
   3   5   2  217.58   11.00
   5  -4  -2   57.99    3.30
   5  -4  -2   53.59    2.80
   5  -4  -2   58.29    3.00
   4   5  -2   56.89    3.40
   4   5   2   56.79    3.40
   5  -4   2   56.69    3.30
   5  -5  -2   22.80    1.60
   5   5  -2   23.30    1.80
   5  -5  -2   21.10    1.60
   5  -5  -2   21.40    1.30
   5  -5   2   21.30    1.60
   5   5   2   18.30    1.80
   5   5   2   19.80    2.10
   5  -6  -2  294.77   15.70
   6   5  -2  289.67   15.20
   5  -6   2  293.67   15.70
   6   5   2  289.67   15.20
   4  -6  -2   24.70    1.70
   4  -6  -2   22.00    1.60
   6   4  -2   19.60    1.90
   6   4   2   24.90    2.00
   4  -6   2   22.70    1.60
   6   3  -2  140.89    7.50
   3  -6  -2  140.19    6.60
   6   3  -2  142.69    6.50
   3  -6  -2  136.59    7.50
   6   3   2  126.99    7.40
   6   2  -2  129.99    7.60
   2  -6  -2  139.09    7.80
   6   2  -2  142.69    6.70
   2  -6  -2  142.49    6.80
   6   2   2  145.19    7.70
   6   2   2  148.59    6.70
   2  -6   2  159.38    7.90
   6   1  -2   44.70    2.70
   1  -6  -2   41.50    2.50
   1  -6  -2   41.80    2.30
   6   1  -2   45.50    2.20
   6   1   2   44.30    2.70
   6   1   2   46.20    2.20
   1  -6   2   36.70    2.50
   6   0  -2  452.95   23.60
   6   0  -2  474.05   21.20
   0  -6  -2  485.75   24.80
   0  -6   2  448.66   24.80
   6   0   2  481.75   21.20
   6   0   2  472.15   23.70
  -1  -6  -2   37.30    2.20
   6  -1  -2   31.60    1.90
  -1  -6   2   43.90    2.30
   6  -1   2   35.20    2.40
   6  -1   2   37.80    2.00
  -2  -6  -2  143.39    7.70
   2   6  -2  149.88    7.50
   6  -2  -2  148.99    6.60
   6  -2   2  135.09    6.60
  -2  -6   2  134.89    7.70
   6  -2   2  138.39    7.80
   6  -3  -2  131.39    7.50
   6  -3  -2  133.89    6.40
  -3  -6  -2  134.39    7.40
   3   6  -2  141.89    7.30
   6  -3   2  138.29    6.30
   6  -3   2  140.29    7.50
  -3  -6   2  131.89    7.40
   3   6   2  136.19    7.30
   6  -4  -2   24.90    1.50
   6  -4  -2   25.40    1.80
   4   6  -2   22.30    1.90
   4   6   2   23.60    1.90
   6  -4   2   23.10    1.80
   6  -5  -2  279.47   15.50
   6  -5  -2  297.77   13.20
   5   6  -2  279.57   14.90
   5   6   2  289.37   16.80
   5   6   2  284.67   14.90
   6  -5   2  292.07   15.50
   6   6  -2   87.39    5.00
   6  -6  -2   80.99    4.80
   6  -6   2   77.49    4.80
   6   6   2   83.69    4.90
   6  -7  -2   12.00    1.00
   7   6  -2   12.00    1.10
   7   6  -2    9.60    1.60
   6  -7  -2   11.50    1.10
   6  -7  -2   14.30    1.00
   6  -7  -2   12.10    1.50
   7   6   2   11.70    1.70
   6  -7   2   12.80    1.10
   6  -7   2   12.20    1.50
   6  -7   2   12.10    1.10
   6  -7   2   13.80    1.10
   7   6   2   10.80    1.00
   7   5  -2   65.89    4.30
   5  -7  -2   66.79    4.00
   5  -7   2   67.59    4.10
   7   5   2   67.29    4.30
   4  -7  -2   17.70    1.50
   7   4  -2   17.50    1.80
   4  -7   2   16.50    1.50
   7   4   2   19.90    1.90
   7   3  -2   11.60    1.40
   3  -7  -2   11.20    1.10
   3  -7   2    9.90    1.10
   7   3   2   11.70    1.50
   7   2  -2   41.40    2.20
   7   2  -2   41.90    2.80
   2  -7  -2   39.90    2.40
   2  -7  -2   49.90    2.60
   2  -7   2   39.80    2.50
   7   2   2   34.40    2.70
   7   2   2   38.50    2.20
   7   1  -2  134.19    7.90
   7   1  -2  147.49    6.90
   1  -7  -2  139.49    8.00
   7   1   2  150.78    8.00
   7   1   2  154.78    7.00
   1  -7   2  160.58    8.10
   0  -7  -2   26.80    1.70
   7   0  -2   24.70    1.90
   7   0  -2   26.30    1.60
   7   0   2   22.80    1.90
   0  -7   2   27.40    1.80
   7   0   2   27.60    1.50
  -1  -7  -2  157.18    8.10
   7  -1  -2  148.29    7.00
  -1  -7  -2  142.79    7.00
   7  -1   2  143.19    6.90
  -1  -7   2  150.58    8.10
  -2  -7  -2   36.50    2.30
  -2  -7  -2   42.40    2.50
   7  -2  -2   40.30    2.20
   7  -2   2   40.40    2.20
  -2  -7   2   43.00    2.50
   7  -3  -2   11.10    1.00
   7  -3   2    9.40    0.90
  -3  -7   2   12.70    1.10
   4   7  -2   13.50    1.60
   7  -4  -2   13.70    1.50
   7  -4  -2   14.60    1.10
  -4  -7   2   20.40    1.40
   7  -4   2   16.00    1.50
   5   7  -2   57.29    3.90
   7  -5  -2   64.59    3.90
   7  -5  -2   60.69    3.20
  -5  -7   2   60.89    3.70
   7  -5   2   62.79    3.80
   5   7   2   62.79    3.90
   7  -6  -2   10.60    1.00
   6   7  -2   10.30    1.60
   7  -6  -2    9.80    1.00
   7  -6  -2   13.00    1.50
   7  -6  -2   13.40    1.00
   6   7   2    8.80    1.60
   7  -6   2   11.20    1.00
   7  -6   2    9.80    1.50
   7  -6   2   12.60    1.10
   7  -6   2   13.20    1.10
   7  -6   2   12.00    1.00
   7  -7  -2    7.10    0.90
   7  -7  -2    6.90    0.80
   7   7  -2    6.60    0.80
   7  -7  -2    6.60    1.20
   7  -7  -2    7.20    0.90
   7  -7  -2    7.20    0.90
   7   7  -2    6.50    0.80
   7   7  -2    6.50    1.40
   7  -7   2    6.30    1.20
   7   7   2    6.20    0.80
   7  -7   2    8.10    0.90
   7  -7   2    6.90    0.80
   7   7   2    4.90    1.30
   7  -7   2    7.20    0.90
   7  -7   2    7.70    0.80
   7   7   2    4.80    0.70
   8   7  -2    8.70    1.00
   7  -8  -2    7.90    1.00
   7  -8  -2    8.40    1.00
   7  -8  -2    9.90    0.90
   7  -8  -2    6.90    1.20
   7  -8   2   10.60    1.40
   7  -8   2    9.30    1.00
   8   7   2    9.10    1.00
   7  -8   2   10.00    1.00
   7  -8   2    9.00    0.90
   8   7   2   10.10    1.00
   7  -8   2   11.80    1.00
   6  -8  -2    9.30    0.90
   6  -8  -2    9.00    1.00
   8   6  -2    9.40    0.90
   6  -8  -2    9.50    1.00
   6  -8  -2    8.70    1.30
   8   6  -2    8.60    1.50
   6  -8   2    7.20    0.90
   6  -8   2    9.00    0.90
   6  -8   2    8.20    1.00
   6  -8   2    8.40    1.30
   8   6   2    6.90    1.40
   8   6   2    9.70    1.00
   6  -8   2    7.00    0.90
   8   6   2    7.80    1.00
   8   5  -2   22.30    2.30
   5  -8  -2   24.80    2.00
   5  -8  -2   23.00    1.50
   8   5  -2   23.50    1.50
   5  -8  -2   23.50    1.40
   5  -8  -2   24.00    1.50
   5  -8   2   26.40    1.50
   5  -8   2   24.40    1.50
   5  -8   2   24.40    1.50
   8   5   2   23.30    2.30
   5  -8   2   27.10    2.10
   8   5   2   24.70    1.50
   5  -8   2   22.80    1.50
   5  -8   2   24.70    1.50
   4  -8  -2   11.20    1.00
   4  -8  -2   10.60    0.90
   4  -8  -2   12.50    1.30
   8   4  -2   12.80    1.00
   8   4  -2   13.70    1.70
   4  -8   2   13.60    1.40
   4  -8   2   12.00    1.00
   4  -8   2    9.80    1.10
   8   4   2   12.00    1.70
   4  -8   2   13.30    1.00
   8   4   2   11.10    1.00
   8   3  -2  156.08    8.40
   3  -8  -2  147.99    6.70
   3  -8  -2  147.09    8.30
   3  -8   2  149.09    6.60
   3  -8   2  152.68    8.40
   8   3   2  155.38    8.40
   2  -8  -2   16.00    1.10
   2  -8  -2   16.70    1.50
   8   2  -2   21.00    1.40
   8   2  -2   20.20    1.90
   8   2   2   17.40    1.80
   2  -8   2   16.50    1.40
   8   1  -2   22.30    1.90
   8   1  -2   22.90    1.50
   1  -8  -2   20.30    1.50
   1  -8   2   18.60    1.50
   8   1   2   21.20    1.40
   8   1   2   20.50    1.90
   0  -8  -2   -0.20    0.50
   8   0  -2   -0.40    0.50
   8   0   2   -0.10    0.50
   0  -8   2    0.60    0.50
  -1  -8  -2   21.50    1.60
   8  -1  -2   23.50    1.50
  -1  -8   2   20.50    1.60
   8  -1   2   22.00    1.40
   8  -2  -2   13.60    1.20
  -2  -8   2   16.40    1.40
   8  -2   2   16.20    1.10
   8  -3  -2  143.19    6.80
  -3  -8  -2  137.89    6.30
  -3  -8   2  144.69    7.90
   8  -3   2  140.59    6.70
  -3  -8   2  144.99    6.20
   8  -4  -2   11.20    0.90
   8  -4  -2   11.30    1.00
  -4  -8   2    9.90    1.10
  -4  -8   2   10.50    0.90
   8  -4   2   12.30    0.90
   8  -5  -2   24.80    1.40
   8  -5  -2   25.80    1.50
   8  -5  -2   22.90    1.40
   8  -5  -2   23.00    1.50
   8  -5   2   22.00    1.40
   8  -5   2   23.90    1.40
   8  -5   2   23.20    1.50
   8  -6  -2    7.00    0.90
   8  -6  -2    8.40    1.00
   8  -6  -2    8.00    0.90
   8  -6  -2    6.70    0.90
   6   8  -2    7.10    1.40
   8  -6   2    9.30    1.00
   8  -6   2   10.10    1.00
   8  -6   2    9.10    0.90
   8  -6   2    9.60    0.90
   8  -6   2    7.90    0.90
   8  -7  -2    9.30    0.90
   7   8  -2    8.50    1.00
   8  -7  -2    9.70    0.90
   8  -7  -2   10.20    0.90
   7   8  -2    8.50    1.00
   8  -7  -2   10.50    1.00
   8  -7   2   10.10    1.00
   8  -7   2    9.50    1.00
   7   8   2    9.10    1.00
   8  -7   2    8.20    0.90
   8  -7   2    9.00    1.00
   7   8   2    7.90    1.00
   8  -7   2    9.80    0.90
   8  -8  -2    0.50    0.50
   8  -8  -2    0.70    0.50
   8  -8  -2    0.40    0.50
   8   8  -2    1.00    0.50
   8  -8   2    1.00    0.50
   8   8   2    0.80    0.50
   8   8   2    0.30    0.50
   8  -8   2    0.10    0.50
   8  -8   2    0.70    0.50
   8  -8   2    1.10    0.50
   9   8  -2    5.80    0.70
   8  -9  -2    4.50    0.60
   8  -9  -2    4.80    0.60
   8  -9   2    4.90    0.60
   8  -9   2    4.60    0.60
   9   8   2    5.00    0.60
   9   8   2    6.80    0.80
   9   7  -2    6.70    0.80
   7  -9  -2    6.60    0.90
   7  -9  -2    6.70    0.80
   7  -9   2    7.60    0.90
   9   7   2    7.00    0.90
   7  -9   2    8.70    1.00
   6  -9  -2    4.60    0.70
   6  -9  -2    6.00    0.70
   9   6  -2    7.80    0.90
   6  -9   2    4.90    0.70
   6  -9   2    4.10    0.70
   9   6   2    5.60    0.70
   5  -9  -2    8.40    1.00
   5  -9  -2   10.20    1.00
   5  -9  -2   10.60    1.30
   9   5  -2   11.30    1.10
   5  -9   2    8.30    1.00
   5  -9   2    9.60    1.00
   5  -9   2    9.30    1.30
   9   5   2    9.10    0.90
   4  -9  -2   13.10    1.10
   9   4  -2   12.90    1.80
   4  -9  -2   13.90    1.10
   4  -9  -2   13.50    1.20
   4  -9  -2   14.90    1.50
   9   4  -2   14.60    1.20
   4  -9   2   14.70    1.20
   9   4   2    8.20    1.60
   4  -9   2   13.90    1.10
   9   4   2   14.70    1.10
   4  -9   2   14.70    1.50
   4  -9   2   14.40    1.10
   9   3  -2    9.00    0.90
   3  -9  -2    7.70    0.80
   3  -9  -2    7.50    0.90
   3  -9  -2    5.80    0.70
   3  -9  -2    8.70    1.20
   9   3  -2    5.20    1.30
   9   3   2    7.80    1.40
   3  -9   2    8.30    1.20
   9   3   2    9.20    0.90
   3  -9   2    7.30    0.80
   3  -9   2    8.30    1.00
   3  -9   2    6.70    0.80
   2  -9  -2    8.60    0.90
   2  -9  -2    8.90    1.20
   9   2  -2    9.60    1.10
   9   2  -2    9.90    0.90
   9   2  -2    8.30    1.40
   2  -9  -2    9.30    0.90
   9   2  -2   10.40    0.90
   2  -9   2    9.20    1.30
   9   2   2   11.10    0.90
   9   2   2    7.60    1.40
   2  -9   2    9.50    0.90
   2  -9   2    9.90    0.90
   9   1  -2    9.00    1.10
   1  -9  -2    9.10    1.20
   1  -9  -2    8.70    0.90
   1  -9  -2    9.90    0.90
   9   1  -2    8.90    0.90
   1  -9   2   10.30    0.90
   9   1   2   12.20    1.20
   9   1   2   13.50    1.00
   1  -9   2   11.20    1.20
   1  -9   2   10.90    0.90
   9   0  -2   -0.20    0.50
   9   0  -2    0.00    0.40
   0  -9  -2    0.10    0.40
   0  -9  -2    0.00    0.50
   9   0   2    0.20    0.60
   0  -9   2    0.20    0.40
   9   0   2   -0.50    0.40
   0  -9   2    0.00    0.60
   9  -1  -2   11.30    0.90
  -1  -9  -2    8.70    0.80
   9  -1  -2   11.30    1.10
   9  -1  -2   10.60    0.90
  -1  -9   2   10.40    0.90
  -1  -9   2   10.10    1.20
   9  -1   2   10.10    0.90
   9  -1   2    8.60    1.00
   9  -1   2    8.40    0.90
  -2  -9  -2   10.90    0.90
   9  -2  -2   10.10    0.90
   9  -2  -2    9.10    0.90
   9  -2  -2   10.00    1.00
  -2  -9   2    9.10    0.90
   9  -2   2    9.50    0.90
  -2  -9   2   10.00    1.10
   9  -2   2    9.40    0.90
   9  -2   2   10.30    1.00
   9  -3  -2    8.90    0.90
   9  -3  -2    7.50    1.00
  -3  -9  -2    8.90    0.80
   9  -3  -2    7.50    0.80
   9  -3   2    6.00    0.80
  -3  -9   2    8.30    1.10
   9  -3   2    7.40    0.90
  -3  -9   2    7.70    0.80
   9  -3   2    7.10    0.80
   9  -4  -2   13.90    1.00
   9  -4  -2   12.80    1.20
   9  -4  -2   14.40    1.10
   9  -4   2   15.20    1.20
   9  -4   2   14.70    1.00
  -4  -9   2   14.00    1.00
   9  -5  -2    7.30    0.80
   9  -5  -2    9.40    1.00
   9  -5   2    9.90    0.90
   9  -5   2   10.60    0.90
   9  -5   2    9.80    1.00
   9  -6  -2    5.40    0.60
   9  -6  -2    6.10    0.70
   9  -6  -2    4.80    0.70
   9  -6  -2    4.90    0.60
   9  -6   2    3.60    0.60
   6   9   2    6.50    0.80
   6   9   2    7.10    0.90
   9  -6   2    5.60    0.70
   9  -6   2    5.10    0.70
   9  -6   2    5.60    0.70
   7   9  -2    8.30    0.90
   7   9  -2    7.60    0.90
   9  -7  -2    7.20    0.80
   9  -7  -2    7.40    0.90
   9  -7   2    7.30    1.00
   9  -7   2    6.60    0.80
   7   9   2    6.40    0.70
   9  -7   2    7.20    0.80
   9  -7   2    6.90    0.90
   7   9   2    6.20    0.70
   9  -8  -2    4.60    0.60
   8   9  -2    4.70    0.60
   9  -8   2    4.60    0.60
   8   9   2    4.40    0.60
   9  -8   2    5.90    0.70
   8   9   2    4.60    0.60
   9  -9  -2    7.30    0.80
   9   9  -2    7.60    0.80
   9   9   2    8.50    0.70
   9   9   2    7.60    0.70
  10   8  -2    3.50    0.50
   8 -10  -2    4.30    0.60
   8 -10  -2    3.50    0.50
  10   8   2    3.50    0.50
   7 -10  -2    3.90    0.60
   7 -10  -2    4.40    0.60
  10   7  -2    3.40    0.60
  10   7   2    4.00    0.60
   7 -10   2    4.60    0.60
   7 -10   2    4.30    0.60
   6 -10  -2    3.00    0.60
   6 -10  -2    3.90    0.60
  10   6  -2    3.00    0.60
  10   6   2    4.20    0.60
   6 -10   2    3.80    0.60
   6 -10   2    3.50    0.60
  10   5  -2    5.20    0.70
   5 -10  -2    5.10    0.70
   5 -10  -2    4.90    0.70
  10   5   2    4.50    0.60
   5 -10   2    4.50    0.70
   5 -10   2    4.50    0.70
   4 -10  -2    6.00    0.80
  10   4  -2    6.50    0.70
   4 -10  -2    5.60    0.70
   4 -10   2    8.60    0.90
   4 -10   2    5.00    0.70
   4 -10   2    6.40    0.80
  10   4   2    5.50    0.70
   3 -10  -2    5.70    1.00
   3 -10  -2    6.20    0.70
   3 -10  -2    5.30    0.70
  10   3  -2    6.00    0.70
   3 -10  -2    4.50    0.70
   3 -10   2    5.10    0.70
   3 -10   2    4.80    0.70
   3 -10   2    5.10    0.70
  10   3   2    4.90    0.70
   3 -10   2    4.60    1.00
   2 -10  -2   23.70    1.40
   2 -10  -2   22.80    1.80
  10   2  -2   23.40    1.40
  10   2  -2   21.70    1.30
   2 -10  -2   22.20    1.40
   2 -10   2   19.90    1.30
  10   2   2   23.10    1.40
   2 -10   2   21.30    1.40
   2 -10   2   21.10    1.80
   1 -10  -2   17.70    1.20
   1 -10  -2   16.20    1.50
  10   1  -2   18.00    1.50
  10   1  -2   17.00    1.10
  10   1  -2   14.40    1.10
   1 -10  -2   15.60    1.10
  10   1   2   16.70    1.10
   1 -10   2   15.30    1.10
  10   1   2   14.60    1.10
  10   0  -2    2.90    0.80
   0 -10  -2    2.80    0.60
  10   0  -2    2.40    0.50
  10   0  -2    2.60    0.60
   0 -10   2    3.20    0.50
  10   0   2    3.50    0.80
   0 -10   2    2.60    0.80
  10   0   2    3.00    0.60
  10   0   2    3.10    0.60
  10  -1  -2   15.20    1.20
  10  -1  -2   15.60    1.10
  10  -1  -2   13.90    1.30
  -1 -10  -2   15.10    1.10
  10  -1   2   15.10    1.40
  -1 -10   2   13.40    1.00
  10  -1   2   17.00    1.10
  10  -1   2   15.20    1.10
  -1 -10   2   13.50    1.40
  -2 -10  -2   23.50    1.40
  10  -2  -2   21.60    1.50
  10  -2  -2   22.50    1.60
  10  -2  -2   21.80    1.40
  10  -2   2   23.10    1.70
  -2 -10   2   27.20    1.40
  -2 -10   2   25.10    1.80
  10  -2   2   24.30    1.40
  10  -2   2   24.10    1.50
  10  -3  -2    5.40    0.70
  10  -3  -2    5.40    0.90
  -3 -10  -2    5.00    0.60
  10  -3  -2    6.10    0.70
  10  -3   2    5.50    0.70
  10  -3   2    5.30    0.70
  -3 -10   2    6.30    0.80
  10  -4  -2    5.80    0.80
  10  -4  -2    7.40    0.90
  10  -4  -2    4.90    0.80
  10  -4   2    7.60    0.90
  10  -4   2    6.70    0.80
  -4 -10   2    6.90    0.80
  10  -5  -2    4.20    0.60
  10  -5  -2    4.50    0.70
  10  -5   2    4.90    0.60
  10  -5   2    5.40    0.70
  10  -5   2    5.40    0.60
   6  10  -2    4.30    0.60
   6  10  -2    3.70    0.60
  10  -6  -2    2.40    0.60
  10  -6  -2    3.80    0.50
  10  -6   2    4.20    0.70
   6  10   2    4.10    0.60
   6  10   2    4.10    0.60
  10  -6   2    3.40    0.60
  10  -6   2    3.80    0.50
   7  10  -2    5.00    0.60
   7  10  -2    4.30    0.60
  10  -7  -2    3.70    0.50
  10  -7  -2    4.30    0.50
  10  -7   2    3.70    0.50
   7  10   2    4.60    0.60
   7  10   2    4.80    0.60
  10  -7   2    2.90    0.60
   8  10  -2    3.40    0.50
  10  -8  -2    3.40    0.50
   8  10   2    2.90    0.50
   8  10   2    3.00    0.50
  10  -8   2    2.50    0.50
   7 -11  -2    3.20    0.50
  11   7  -2    3.00    0.40
  11   7   2    4.10    0.50
   7 -11   2    2.70    0.50
   6 -11  -2    7.80    0.90
   6 -11  -2    6.30    0.70
  11   6  -2    6.10    0.70
  11   6   2    5.90    0.70
   6 -11   2    6.00    0.70
   5 -11  -2    5.00    0.60
  11   5  -2    4.80    0.60
   5 -11  -2    5.30    0.70
   5 -11   2    5.00    0.60
  11   5   2    6.70    0.70
   4 -11  -2    1.50    0.50
   4 -11  -2    1.50    0.60
  11   4  -2    0.80    0.50
   4 -11   2    1.10    0.50
  11   4   2    1.80    0.50
  11   3  -2   18.50    1.20
   3 -11  -2   18.00    1.20
   3 -11  -2   18.00    1.30
   3 -11   2   18.40    1.20
  11   3   2   19.30    1.20
   3 -11   2   18.80    1.20
  11   2  -2    4.00    0.60
   2 -11  -2    3.90    0.60
   2 -11  -2    4.20    0.60
  11   2   2    3.00    0.60
   2 -11   2    3.60    0.60
   2 -11   2    3.90    0.60
  11   1  -2   21.70    1.40
   1 -11  -2   22.70    1.40
  11   1  -2   22.80    1.30
   1 -11  -2   21.90    1.30
   1 -11   2   22.00    1.30
  11   1   2   21.80    1.30
  11   1   2   21.90    1.30
  11   0  -2   14.90    1.10
   0 -11  -2   12.50    1.00
  11   0  -2   14.10    1.00
  11   0   2   13.50    1.00
   0 -11   2   14.20    1.10
  11   0   2   14.70    1.10
  11  -1  -2   23.60    1.40
  -1 -11  -2   22.30    1.40
  11  -1  -2   25.20    1.70
  11  -1  -2   23.90    1.40
  -1 -11   2   22.30    1.40
  11  -1   2   23.00    1.40
  11  -1   2   22.70    1.40
  -2 -11  -2    3.90    0.60
  11  -2  -2    3.50    0.60
  11  -2  -2    3.40    0.60
  11  -2  -2    3.10    0.80
  11  -2   2    3.80    0.80
  -2 -11   2    4.70    0.60
  11  -2   2    4.90    0.60
  11  -2   2    4.70    0.60
  11  -3  -2   18.00    1.20
  11  -3  -2   19.60    1.20
  11  -3  -2   17.60    1.40
  -3 -11  -2   18.00    1.10
  11  -3   2   16.60    1.10
  -3 -11   2   17.50    1.10
  11  -3   2   18.50    1.20
  11  -4  -2    1.40    0.40
  11  -4  -2    2.10    0.50
  -4 -11   2    1.60    0.40
  11  -4   2    1.40    0.50
  11  -4   2    1.80    0.50
  11  -5  -2    5.60    0.70
  11  -5  -2    4.70    0.60
  11  -5   2    5.50    0.60
   5  11   2    6.00    0.70
   5  11   2    5.70    0.70
  11  -5   2    3.70    0.60
  11  -6  -2    5.50    0.60
   6  11  -2    6.40    0.70
   6  11  -2    6.20    0.70
  11  -6  -2    6.30    0.60
   6  11   2    7.40    0.70
   6  11   2    6.00    0.70
  11  -6   2    5.20    0.70
  11  -6   2    5.80    0.80
   7  11  -2    3.40    0.40
   7  11  -2    2.80    0.40
   7  11   2    2.50    0.40
   7  11   2    2.50    0.40
  11  -7   2    2.40    0.50
  11  -7   2    2.80    0.40
  12   6  -2    2.60    0.40
   6 -12  -2    2.40    0.40
  12   6   2    2.70    0.40
  12   5  -2    0.30    0.40
   5 -12  -2    0.00    0.30
  12   5   2    0.00    0.30
   5 -12   2    0.50    0.40
   4 -12  -2    1.50    0.40
  12   4  -2    1.10    0.40
   4 -12   2    0.50    0.40
  12   4   2    0.80    0.40
  12   3  -2    3.40    0.50
   3 -12  -2    2.30    0.50
  12   3   2    3.30    0.50
   3 -12   2    2.50    0.50
  12   2  -2    6.60    0.70
   2 -12  -2    5.50    0.70
   2 -12   2    6.00    0.70
  12   2   2    6.40    0.70
  12   1  -2    1.00    0.40
  12   1  -2    0.20    0.40
   1 -12  -2    0.70    0.50
   1 -12   2    1.00    0.50
  12   1   2    0.70    0.40
  12   0  -2    0.20    0.40
  12   0  -2    0.50    0.40
   0 -12  -2    0.60    0.40
   0 -12   2    0.70    0.50
  12   0   2   -0.10    0.40
  12   0   2    0.20    0.40
  12  -1  -2    0.70    0.40
  12  -1  -2    0.50    0.40
  -1 -12  -2    1.10    0.40
  -1 -12   2    0.70    0.40
  12  -1   2    0.60    0.40
  12  -1   2    0.50    0.40
  12  -2  -2    4.90    0.60
  -2 -12  -2    5.80    0.70
  12  -2  -2    6.30    0.80
  12  -2   2    6.50    0.70
  12  -2   2    5.80    0.80
  -2 -12   2    7.50    0.70
  12  -3  -2    2.50    0.50
  12  -3  -2    2.70    0.40
  12  -3   2    2.30    0.50
  12  -3   2    2.20    0.40
  -3 -12   2    3.60    0.50
  12  -4  -2    1.70    0.40
  12  -4  -2    0.70    0.40
  12  -4   2    1.00    0.50
  12  -4   2    1.70    0.40
   4  12   2    1.40    0.50
  12  -5  -2    0.60    0.40
  12  -5  -2    0.50    0.30
   5  12  -2    0.20    0.40
   5  12  -2    0.60    0.40
  12  -5   2    0.80    0.30
   5  12   2    0.10    0.30
  12  -5   2    0.50    0.40
   5  12   2    0.50    0.40
   6  12  -2    1.90    0.40
  12  -6   2    2.20    0.40
   6  12   2    2.20    0.40
  13   3  -2    0.60    0.30
  13   3   2    1.00    0.30
  13   2  -2    1.10    0.30
  13   2   2    1.40    0.40
  13   1  -2    0.20    0.30
  13   1  -2    0.10    0.40
  13   1   2    0.40    0.30
   1 -13   2    0.60    0.40
  13   0  -2    5.20    0.60
  13   0  -2    6.10    0.60
  13   0   2    3.70    0.50
  13   0   2    6.00    0.60
   0 -13   2    5.10    0.60
  13  -1  -2    0.20    0.30
  13  -1  -2    0.40    0.40
  13  -1   2   -0.10    0.40
  13  -1   2    0.00    0.30
  -1 -13   2    0.40    0.40
  13  -2  -2    1.30    0.30
  13  -2  -2    1.80    0.40
  13  -2   2    1.50    0.30
  13  -2   2    1.50    0.40
  13  -3  -2    1.20    0.40
  13  -3   2    0.40    0.30
  13  -3   2    0.80    0.40
   3  13   2    0.60    0.30
   4  13  -2    0.70    0.30
   4  13   2    0.80    0.30
   0   0   3    1.10    0.20
   1   0   3 3211.68  178.68
   1  -1  -3  570.94   25.70
   1  -2  -3 3274.67  143.89
   2   1  -3 3332.47  143.79
   2   1   3 3184.18  181.18
   0  -2  -3 1707.93   75.19
   2   0  -3 1719.03   75.19
   2   0  -3 1698.43   94.59
   2   0   3 1697.63   94.69
   2  -1  -3 3194.48  140.99
   2  -2  -3  327.07   14.60
   2  -3  -3   98.59    4.80
   3   2  -3   94.29    5.40
   3   2   3  109.99    6.10
   3   2   3  115.09    5.50
   3   1  -3  114.59    5.20
   3   1  -3  115.89    6.70
   1  -3  -3  111.29    5.40
   3   1   3  125.09    6.80
   0  -3  -3  264.97   11.90
   3   0  -3  281.97   11.80
   3   0  -3  255.17   14.90
   3   0   3  263.07   15.00
   3  -1  -3  139.59    6.10
  -1  -3  -3  129.89    6.10
   3  -2  -3  112.89    4.90
   2   3  -3  103.79    5.50
  -2  -3  -3   99.19    4.70
   3   3  -3   61.19    3.20
   3  -3  -3   54.39    2.80
   3  -3  -3   55.09    3.20
   3  -3   3   58.49    3.20
   3   3   3   54.99    3.20
   3  -4  -3   67.69    3.70
   4   3  -3   65.59    3.70
   4   3   3   64.49    3.70
   4   3   3   62.99    4.20
   3  -4   3   70.39    3.70
   2  -4  -3  213.28   12.40
   2  -4  -3  222.58   10.60
   4   2  -3  245.58   11.90
   4   2  -3  229.68   13.30
   2  -4   3  245.88   12.40
   4   2   3  252.37   12.00
   4   2   3  229.38   13.30
   4   1  -3  308.07   18.90
   1  -4  -3  331.77   15.10
   4   1  -3  326.97   16.90
   4   1   3  349.77   19.00
   4   1   3  367.36   17.00
   4   0  -3  968.00   41.20
   4   0  -3  923.41   46.40
   0  -4  -3  912.51   41.30
   4   0   3  968.30   46.40
   4   0   3  894.91   51.99
   1   4  -3  361.56   18.10
  -1  -4  -3  349.47   16.10
   4  -1  -3  380.06   16.10
   4  -1   3  355.16   18.20
   4  -2  -3  229.28   10.40
   2   4  -3  248.68   11.80
   4  -2  -3  241.58   12.30
   2   4   3  220.78   11.70
   4  -2   3  213.88   12.30
   4  -3  -3   66.49    3.80
   4  -3  -3   64.39    3.30
   3   4  -3   68.39    3.80
   3   4   3   64.59    3.70
   4  -3   3   69.69    3.80
   4   4  -3   52.09    3.40
   4  -4  -3   66.19    3.40
   4  -4  -3   61.89    3.10
   4  -4   3   52.19    3.30
   4   4   3   59.59    3.40
   4  -5  -3  260.27   13.40
   4  -5  -3  249.97   11.50
   5   4  -3  253.87   12.90
   4  -5  -3  248.48   11.40
   5   4   3  239.68   12.90
   5   4   3  240.08   14.40
   4  -5   3  253.37   13.40
   3  -5  -3   19.80    1.40
   3  -5  -3   20.20    1.50
   5   3  -3   18.90    1.30
   5   3  -3   23.00    1.70
   5   3   3   21.10    1.80
   5   3   3   22.60    1.70
   3  -5   3   23.10    1.50
   2  -5  -3   56.89    3.40
   2  -5  -3   54.39    3.10
   5   2  -3   55.79    3.50
   5   2   3   67.79    3.60
   5   2   3   66.69    3.90
   2  -5   3   67.19    3.50
   1  -5  -3  113.99    5.70
   1  -5  -3  104.59    5.00
   5   1  -3  101.29    5.60
   5   1   3  102.39    6.30
   1  -5   3  103.39    5.80
   5   1   3  108.29    5.70
   0  -5  -3   74.59    3.50
   5   0  -3   73.09    4.00
   0  -5  -3   69.79    4.00
   0  -5   3   73.79    4.10
   5   0   3   70.89    4.40
   5   0   3   78.49    4.10
  -1  -5  -3  107.19    5.90
   5  -1  -3  104.59    5.10
   1   5  -3  104.19    5.80
   5  -1   3  114.59    6.00
  -1  -5   3  114.19    6.00
   5  -1   3  116.19    5.90
   5  -2  -3   69.09    3.20
  -2  -5  -3   69.69    3.60
   5  -2  -3   74.69    3.70
   2   5  -3   71.09    3.70
  -2  -5   3   56.69    3.60
   5  -2   3   57.89    3.70
   2   5   3   56.79    3.60
  -3  -5  -3   24.60    1.50
   5  -3  -3   25.10    1.60
   3   5  -3   22.10    1.70
   5  -3  -3   21.70    1.50
   5  -3   3   21.90    1.60
   3   5   3   22.60    1.70
   4   5  -3  242.38   12.70
   5  -4  -3  246.08   13.20
   5  -4  -3  254.07   11.30
   5  -4  -3  234.88   11.30
   4   5   3  246.78   12.70
   5  -4   3  253.67   13.20
   5  -5  -3  441.26   23.40
   5   5  -3  423.26   22.30
   5  -5  -3  454.75   19.90
   5  -5  -3  427.96   19.90
   5   5   3  440.76   25.10
   5   5   3  444.56   22.30
   5  -5   3  438.76   23.40
   5  -6  -3    1.60    0.50
   5  -6  -3    1.10    0.70
   6   5  -3    2.30    1.00
   5  -6   3    2.10    0.70
   6   5   3    2.70    1.00
   6   5   3    0.90    0.80
   6   4  -3    1.50    0.80
   4  -6  -3    3.10    0.70
   4  -6  -3    2.00    0.70
   4  -6  -3    2.90    0.60
   6   4   3    1.80    0.80
   4  -6   3    1.70    0.60
   3  -6  -3   33.40    2.10
   3  -6  -3   31.40    2.10
   3  -6  -3   33.60    1.90
   6   3  -3   36.20    1.90
   6   3  -3   32.90    2.30
   3  -6   3   34.30    2.20
   6   3   3   34.70    2.40
   2  -6  -3   15.90    1.20
   2  -6  -3   16.00    1.10
   6   2  -3   14.10    1.10
   6   2  -3   12.60    1.40
   2  -6  -3   14.90    1.20
   6   2   3   16.60    1.50
   6   2   3   19.60    1.20
   6   1  -3   63.69    2.90
   1  -6  -3   58.69    3.00
   6   1  -3   60.79    3.40
   1  -6  -3   54.89    3.20
   1  -6   3   55.29    3.30
   6   1   3   51.69    2.80
   6   1   3   53.69    3.40
   0  -6  -3  551.34   25.70
   0  -6  -3  597.04   30.40
   6   0  -3  558.04   28.90
   6   0  -3  596.64   26.00
   6   0   3  569.44   29.00
   0  -6   3  571.64   30.40
   6   0   3  586.54   26.00
  -1  -6  -3   54.09    3.10
   6  -1  -3   50.89    2.70
  -1  -6   3   55.99    3.20
   6  -1   3   59.79    2.80
   2   6  -3   18.20    1.40
   6  -2  -3   17.40    1.20
   6  -2  -3   17.00    1.10
  -2  -6  -3   17.40    1.20
   6  -2   3   15.30    1.30
  -2  -6   3   16.80    1.20
   6  -2   3   14.20    1.00
   6  -3  -3   31.70    1.80
   3   6  -3   33.20    2.30
   6  -3  -3   32.60    2.00
   6  -3  -3   30.90    2.10
   6  -3   3   31.90    1.80
   3   6   3   30.50    2.20
  -3  -6   3   35.90    2.10
   6  -3   3   31.50    2.10
   6  -4  -3    1.30    0.60
   4   6  -3    2.80    0.80
   6  -4  -3    1.40    0.60
   6  -4  -3    1.70    0.50
   6  -4   3    2.20    0.70
   4   6   3    2.30    0.80
   6  -5  -3    2.60    0.60
   6  -5  -3    2.30    0.80
   5   6  -3    1.70    0.90
   5   6   3    3.60    1.10
   6  -5   3    2.50    0.70
   5   6   3    2.10    0.80
   6   6  -3   15.80    1.80
   6  -6  -3   16.00    1.50
   6  -6   3   16.10    1.60
   6   6   3   14.00    1.70
   7   6  -3  125.19    5.10
   6  -7  -3  114.29    6.40
   6  -7  -3  113.49    5.00
   7   6  -3  118.19    6.50
   6  -7  -3  114.29    5.20
   6  -7  -3  106.89    4.90
   7   6   3  114.39    6.50
   7   6   3  109.99    5.00
   6  -7   3  103.69    5.00
   6  -7   3  104.19    5.00
   6  -7   3  109.39    6.40
   6  -7   3  101.49    5.20
   5  -7  -3   50.39    3.20
   7   5  -3   55.19    3.60
   5  -7   3   48.10    3.20
   7   5   3   51.59    3.50
   7   4  -3  177.08    9.60
   4  -7  -3  182.28    9.70
   7   4   3  185.88    9.70
   4  -7   3  167.18    9.70
   3  -7  -3  111.89    6.10
   3  -7  -3  107.89    5.50
   7   3  -3  113.89    5.30
   7   3  -3  117.29    6.30
   7   3   3  110.09    6.20
   3  -7   3   98.99    6.10
   2  -7  -3    9.30    1.00
   7   2  -3   12.40    1.40
   2  -7  -3   10.80    1.20
   7   2  -3   12.70    1.00
   7   2   3   10.20    1.00
   2  -7   3   11.60    1.10
   7   2   3    8.90    1.30
   7   1  -3   68.19    4.10
   7   1  -3   70.49    3.40
   1  -7  -3   73.79    3.90
   1  -7   3   67.69    4.00
   7   1   3   63.09    4.00
   7   1   3   68.49    3.40
   7   0  -3    1.30    0.70
   0  -7  -3    0.60    0.50
   7   0  -3    1.40    0.50
   0  -7  -3    1.80    0.50
   7   0   3    1.70    0.50
   7   0   3    1.90    0.70
   0  -7   3    0.60    0.50
  -1  -7  -3   69.09    3.60
   7  -1  -3   69.29    3.50
  -1  -7  -3   68.79    4.00
   7  -1   3   69.59    3.50
  -1  -7   3   75.49    4.00
  -2  -7  -3   11.30    1.00
  -2  -7  -3   10.50    1.10
   7  -2  -3   10.20    0.90
  -2  -7   3    9.30    1.00
   7  -2   3   11.40    0.90
   7  -3  -3  110.09    5.30
   7  -3   3  104.89    5.20
  -3  -7   3  114.79    6.10
   7  -4  -3  174.88    8.10
   4   7  -3  161.78    9.20
   7  -4   3  171.98    9.50
  -4  -7   3  179.98    9.40
   7  -5  -3   43.70    2.60
   5   7  -3   47.80    3.30
   7  -5  -3   48.00    3.20
  -5  -7   3   49.10    3.00
   7  -5   3   52.99    3.20
   5   7   3   49.20    3.30
   7  -6  -3   99.39    4.80
   7  -6  -3  102.59    4.90
   6   7  -3  101.69    6.30
   7  -6  -3  114.39    6.30
   7  -6  -3  107.99    5.10
   7  -6   3  113.29    6.30
   7  -6   3  105.49    5.00
   7  -6   3  107.59    5.00
   7  -6   3  113.29    4.90
  -6  -7   3  104.99    6.10
   6   7   3  118.79    6.40
   7  -6   3  108.89    4.90
   7   7  -3   23.60    1.50
   7  -7  -3   22.40    1.40
   7  -7  -3   20.20    1.40
   7   7  -3   22.10    2.20
   7  -7  -3   22.90    2.00
   7  -7  -3   23.20    1.50
   7  -7  -3   20.80    1.30
   7   7   3   21.40    2.20
   7  -7   3   21.60    1.40
   7  -7   3   22.00    1.40
   7   7   3   23.10    1.50
   7  -7   3   21.70    1.40
   7  -7   3   22.20    1.40
   7   7   3   23.70    1.50
   7  -7   3   25.40    2.00
   7  -8  -3    5.70    0.80
   7  -8  -3    5.00    0.70
   8   7  -3    7.70    1.00
   7  -8  -3    6.10    1.10
   8   7   3    7.20    0.80
   8   7   3    7.70    0.90
   7  -8   3    7.50    0.90
   7  -8   3    7.20    1.00
   7  -8   3    8.20    0.80
   7  -8   3    5.40    1.10
   7  -8   3    6.20    0.70
   6  -8  -3   14.80    1.10
   6  -8  -3   13.80    1.60
   8   6  -3   14.90    1.90
   6  -8  -3   13.70    1.10
   8   6  -3   14.90    1.20
   6  -8  -3   12.80    1.10
   6  -8   3   14.30    1.10
   8   6   3   15.10    1.10
   6  -8   3   14.70    1.50
   6  -8   3   14.00    1.10
   8   6   3   14.80    1.10
   6  -8   3   15.50    1.20
   8   6   3   14.00    1.90
   6  -8   3   14.50    1.10
   8   5  -3   60.09    4.30
   5  -8  -3   62.79    3.30
   5  -8  -3   71.39    4.10
   5  -8  -3   61.79    3.10
   8   5  -3   67.49    3.20
   5  -8  -3   61.99    3.10
   8   5   3   69.79    4.40
   5  -8   3   67.29    3.30
   8   5   3   69.89    3.20
   5  -8   3   64.69    3.30
   5  -8   3   73.39    4.20
   8   5   3   69.69    3.10
   5  -8   3   62.19    3.20
   5  -8   3   68.69    3.20
   5  -8   3   68.39    3.20
   8   4  -3    3.40    0.60
   8   4  -3    2.80    1.00
   4  -8  -3    3.10    0.60
   4  -8  -3    3.00    0.60
   4  -8  -3    1.90    0.80
   4  -8   3    3.30    0.60
   8   4   3    2.50    1.00
   4  -8   3    1.70    0.80
   8   4   3    2.70    0.60
   4  -8   3    3.70    0.60
   4  -8   3    2.10    0.60
   3  -8  -3    0.90    0.60
   3  -8  -3    1.70    0.50
   8   3  -3    1.20    0.90
   3  -8   3    2.30    0.50
   3  -8   3    2.20    0.70
   8   3   3    1.30    0.90
   2  -8  -3   71.59    3.30
   8   2  -3   72.29    3.70
   8   2  -3   71.09    4.40
   2  -8  -3   80.59    4.20
   2  -8   3   67.39    4.20
   8   2   3   67.09    4.40
   8   1  -3   20.20    1.50
   8   1  -3   18.90    1.90
   1  -8  -3   25.80    1.70
   1  -8   3   23.90    1.70
   8   1   3   23.60    1.50
   8   1   3   23.50    2.00
   0  -8  -3    0.50    0.50
   8   0  -3    0.70    0.50
   0  -8   3    0.50    0.50
   8   0   3    0.20    0.50
  -1  -8  -3   24.50    1.70
   8  -1  -3   26.90    1.60
  -1  -8   3   23.20    1.70
   8  -1   3   24.40    1.50
  -2  -8  -3   63.59    3.50
   8  -2  -3   62.89    3.40
   8  -2   3   67.49    3.40
  -2  -8   3   69.49    3.90
   8  -3  -3    2.40    0.60
  -3  -8  -3    2.10    0.80
   8  -3   3    1.20    0.60
  -3  -8   3    0.50    0.60
  -3  -8   3    1.20    0.40
   8  -4  -3    2.50    0.70
   8  -4  -3    2.00    0.50
   8  -4   3    3.50    0.60
  -4  -8   3    1.70    0.50
  -4  -8   3    2.20    0.70
   8  -5  -3   65.19    3.10
   8  -5  -3   62.99    3.10
   8  -5  -3   65.69    3.30
   8  -5  -3   63.49    2.90
   8  -5  -3   61.59    3.10
  -5  -8   3   64.89    3.80
   8  -5   3   62.59    3.00
   8  -5   3   60.39    3.10
   8  -5   3   55.19    3.00
   6   8  -3   15.10    1.80
   8  -6  -3   13.90    1.10
   8  -6  -3   14.10    1.00
   8  -6  -3   14.00    1.10
   8  -6   3   14.50    1.10
   8  -6   3   13.50    1.10
   8  -6   3   14.50    1.10
   8  -6   3   12.10    1.20
   6   8   3   10.70    1.10
   8  -6   3   14.20    1.10
   8  -6   3   13.90    1.60
   8  -7  -3    6.90    0.90
   7   8  -3    8.30    0.90
   8  -7  -3    5.70    0.70
   8  -7  -3    6.20    0.70
   7   8  -3    7.90    0.80
   8  -7   3    6.70    0.80
   8  -7   3    5.50    1.10
   8  -7   3    7.60    0.90
   8  -7   3    6.30    0.80
   8  -7   3    6.00    0.70
   7   8   3    7.40    0.80
   8  -7   3    6.30    0.70
   7   8   3    6.70    0.80
   8  -8  -3    1.30    0.50
   8  -8  -3    1.80    0.50
   8   8  -3    1.50    0.60
   8  -8   3    1.80    0.50
   8  -8   3    2.00    0.60
   8  -8   3    1.10    0.50
   8   8   3    1.40    0.50
   8  -8   3    1.80    0.50
   8   8   3    1.60    0.50
   8  -9  -3    0.20    0.50
   9   8  -3   -0.60    0.50
   8  -9  -3   -0.20    0.40
   9   8   3   -0.10    0.40
   8  -9   3    0.10    0.40
   8  -9   3    0.00    0.40
   9   8   3   -0.50    0.40
   7  -9  -3    7.30    0.90
   7  -9  -3    7.40    0.90
   9   7  -3    8.90    0.90
   7  -9   3    7.90    0.90
   7  -9   3    9.00    1.00
   9   7   3    7.50    0.90
   9   7   3    7.60    0.90
   9   6  -3    8.80    1.00
   6  -9  -3    9.20    1.00
   6  -9  -3    8.60    0.90
   6  -9   3    7.50    0.90
   9   6   3    7.40    0.90
   6  -9   3    5.40    0.80
   9   5  -3   43.40    2.20
   5  -9  -3   44.10    2.10
   5  -9  -3   39.50    2.20
   5  -9  -3   39.40    2.80
   5  -9   3   40.80    2.10
   5  -9   3   40.10    2.80
   9   5   3   42.10    2.10
   5  -9   3   38.80    2.20
   4  -9  -3  130.89    5.80
   9   4  -3  137.69    5.80
   9   4  -3  128.89    7.40
   4  -9  -3  132.89    5.80
   4  -9  -3  127.99    7.30
   4  -9  -3  128.59    6.00
   4  -9   3  128.69    6.00
   4  -9   3  129.89    5.80
   9   4   3  125.99    5.80
   9   4   3  124.09    7.40
   4  -9   3  135.39    7.40
   4  -9   3  119.79    5.80
   9   3  -3   37.00    3.00
   3  -9  -3   37.20    2.00
   3  -9  -3   42.90    2.70
   9   3  -3   39.90    2.10
   3  -9  -3   39.10    2.10
   3  -9  -3   38.90    2.00
   3  -9   3   40.50    2.70
   3  -9   3   36.60    2.10
   3  -9   3   39.20    2.00
   3  -9   3   38.60    2.00
   9   3   3   42.50    2.00
   9   3   3   39.70    3.00
   2  -9  -3    5.70    1.00
   9   2  -3    6.10    1.30
   9   2  -3    6.10    1.00
   2  -9  -3    6.90    0.80
   9   2  -3    7.00    0.70
   2  -9  -3    6.80    0.80
   9   2  -3    6.60    0.80
   2  -9   3    7.10    0.80
   9   2   3    6.50    0.70
   2  -9   3    6.60    0.80
   9   2   3    5.30    1.20
   2  -9   3    6.90    1.10
   2  -9   3    7.10    0.80
   9   1  -3   59.19    3.20
   1  -9  -3   52.99    3.60
   1  -9  -3   59.69    2.90
   9   1  -3   57.89    2.80
   1  -9  -3   61.49    2.80
   9   1  -3   60.09    2.90
   1  -9   3   58.99    3.60
   1  -9   3   61.59    2.80
   9   1   3   62.39    2.80
   1  -9   3   61.69    2.90
   0  -9  -3    5.50    0.60
   9   0  -3    4.70    0.80
   9   0  -3    4.20    0.70
   9   0  -3    6.00    0.70
   0  -9  -3    4.70    0.80
   0  -9   3    6.30    0.90
   9   0   3    6.20    0.80
   9   0   3    5.80    0.90
   0  -9   3    6.00    0.70
  -1  -9  -3   58.99    2.80
   9  -1  -3   58.69    2.80
   9  -1  -3   56.39    3.10
   9  -1  -3   59.19    2.90
   9  -1   3   59.79    3.10
   9  -1   3   58.99    2.90
  -1  -9   3   56.39    3.50
   9  -1   3   58.39    2.80
  -1  -9   3   59.89    2.80
   9  -2  -3    6.70    0.80
   9  -2  -3    6.90    0.70
   9  -2  -3    7.90    1.00
  -2  -9  -3    5.90    0.70
  -2  -9   3    6.60    1.00
   9  -2   3    6.70    0.80
   9  -2   3    7.90    0.90
   9  -2   3    6.60    0.90
  -2  -9   3    7.00    0.70
   9  -3  -3   42.10    2.00
   9  -3  -3   41.30    2.30
   9  -3  -3   39.80    2.10
  -3  -9   3   34.90    1.90
  -3  -9   3   39.40    2.60
   9  -3   3   37.10    2.00
   9  -3   3   38.20    2.10
   9  -4  -3  124.49    5.70
   9  -4  -3  119.69    6.20
   9  -4  -3  126.39    5.90
   9  -4   3  134.09    5.90
   9  -4   3  124.89    5.90
  -4  -9   3  131.99    7.20
   9  -4   3  135.39    5.80
  -4  -9   3  131.89    5.70
   9  -5  -3   38.70    2.00
   9  -5  -3   38.00    2.10
   9  -5   3   40.60    2.00
   9  -5   3   38.10    2.10
   9  -5   3   38.50    2.00
   9  -6  -3    7.20    0.90
   9  -6  -3    8.70    0.90
   9  -6  -3    9.10    1.00
   9  -6  -3    7.30    0.90
   9  -6   3    8.90    0.90
   6   9   3    7.90    1.00
   9  -6   3    9.00    1.00
   9  -6   3    8.30    0.90
   6   9   3   11.30    1.00
   7   9  -3    8.50    0.90
   7   9  -3    9.60    0.90
   9  -7  -3    9.50    0.90
   9  -7  -3    9.10    0.80
   7   9   3    8.80    0.90
   9  -7   3    9.10    1.00
   9  -7   3    7.80    0.90
   7   9   3    7.80    0.90
   9  -7   3    7.00    0.80
   9  -7   3    8.40    0.90
   9  -8  -3    0.00    0.40
   8   9  -3    0.10    0.40
   9  -8   3   -0.10    0.40
   8   9   3    0.10    0.40
   8   9   3   -0.40    0.40
   9  -8   3    0.50    0.50
   9   9  -3    2.40    0.50
   9  -9  -3    2.10    0.50
   9   9   3    2.00    0.40
   9   9   3    1.70    0.40
  10   8  -3    5.70    0.60
   8 -10  -3    5.70    0.70
   8 -10  -3    5.10    0.60
  10   8   3    5.10    0.60
  10   7  -3   11.10    0.90
   7 -10  -3    8.50    0.90
   7 -10  -3    9.60    0.80
   7 -10   3    9.30    0.90
  10   7   3    9.00    0.80
   6 -10  -3   10.00    1.00
  10   6  -3    9.80    0.90
   6 -10  -3    7.40    0.90
   6 -10   3   11.20    1.00
  10   6   3    9.30    0.90
   6 -10   3    8.80    0.90
   5 -10  -3   13.60    1.20
   5 -10  -3   15.30    1.10
  10   5  -3   14.20    1.10
   5 -10   3   14.40    1.20
  10   5   3   17.40    1.10
   5 -10   3   14.60    1.10
   4 -10  -3    5.80    0.70
  10   4  -3    5.70    0.70
   4 -10  -3    5.00    0.70
   4 -10   3    5.30    0.70
   4 -10   3    4.60    0.70
   4 -10   3    5.30    0.70
  10   4   3    5.70    0.70
   3 -10  -3   20.70    1.30
   3 -10  -3   17.50    1.30
  10   3  -3   19.70    1.30
   3 -10  -3   20.40    1.70
   3 -10   3   18.90    1.30
   3 -10   3   19.00    1.70
  10   3   3   19.90    1.30
   3 -10   3   18.90    1.30
   3 -10   3   18.00    1.40
   2 -10  -3   18.30    1.20
  10   2  -3   17.10    1.20
   2 -10  -3   17.70    1.20
  10   2  -3   16.00    1.20
   2 -10  -3   18.00    1.60
   2 -10   3   15.40    1.20
   2 -10   3   17.10    1.60
   2 -10   3   17.30    1.20
  10   2   3   16.80    1.20
  10   1  -3   28.60    1.70
  10   1  -3   28.40    1.90
   1 -10  -3   29.90    1.60
   1 -10  -3   29.80    1.60
  10   1  -3   28.60    1.60
   1 -10   3   30.70    1.60
  10   1   3   27.70    1.60
  10   1   3   30.50    1.60
   1 -10   3   30.20    2.20
  10   0  -3    0.60    0.50
  10   0  -3    0.00    0.50
   0 -10  -3    0.60    0.50
  10   0  -3    1.00    0.70
   0 -10   3    0.80    0.50
   0 -10   3    0.90    0.70
  10   0   3    0.40    0.50
  10   0   3    0.60    0.50
  -1 -10  -3   28.20    1.60
  10  -1  -3   33.90    2.00
  10  -1  -3   27.60    1.60
  10  -1  -3   31.00    1.70
  -1 -10   3   28.10    2.10
  -1 -10   3   28.70    1.60
  10  -1   3   26.20    1.90
  10  -1   3   31.10    1.60
  10  -1   3   30.40    1.70
  -2 -10  -3   16.20    1.10
  10  -2  -3   17.50    1.40
  10  -2  -3   16.90    1.20
  10  -2  -3   16.70    1.10
  10  -2   3   16.60    1.40
  10  -2   3   17.00    1.10
  -2 -10   3   15.20    1.10
  -2 -10   3   16.70    1.50
  10  -2   3   16.60    1.20
  10  -3  -3   19.30    1.20
  10  -3  -3   18.60    1.30
  -3 -10  -3   17.80    1.20
  10  -3  -3   18.00    1.40
  10  -3   3   16.70    1.30
  -3 -10   3   18.90    1.20
  10  -3   3   17.80    1.20
  10  -4  -3    6.00    0.90
  10  -4  -3    5.80    0.70
  10  -4  -3    5.40    0.60
  -4 -10   3    7.80    0.80
  10  -4   3    6.30    0.70
  10  -4   3    4.80    0.60
  10  -5  -3   14.30    1.00
  10  -5  -3   14.30    1.10
  10  -5   3   13.80    1.10
  10  -5   3   13.50    1.00
  10  -5   3   14.50    1.00
   6  10  -3   10.80    0.90
  10  -6  -3    9.70    0.80
  10  -6  -3   10.60    1.00
   6  10  -3    8.80    0.90
   6  10   3    8.40    0.90
  10  -6   3    8.50    0.90
  10  -6   3   10.50    1.00
  10  -6   3    8.70    0.90
   6  10   3    8.70    0.90
   7  10  -3    8.00    0.90
   7  10  -3    9.00    0.90
  10  -7  -3    9.10    0.80
   7  10   3    9.80    0.90
   7  10   3    9.50    0.80
  10  -7   3    8.50    0.90
  10  -7   3    8.30    0.80
  10  -7   3    9.90    0.80
  10  -8  -3    5.90    0.70
   8  10  -3    5.40    0.60
   8  10   3    5.80    0.70
   8  10   3    7.10    0.70
  10  -8   3    5.30    0.70
  11   7  -3    2.50    0.40
   7 -11  -3    2.80    0.50
  11   7   3    2.80    0.40
   6 -11  -3    2.80    0.50
   6 -11  -3    2.90    0.50
  11   6  -3    2.60    0.50
   6 -11   3    1.90    0.50
  11   6   3    2.40    0.50
   5 -11  -3    4.90    0.70
  11   5  -3    6.00    0.70
   5 -11  -3    5.50    0.70
  11   5   3    5.90    0.70
   5 -11   3    6.50    0.70
   4 -11  -3    2.10    0.60
   4 -11  -3    2.00    0.50
  11   4  -3    1.60    0.50
   4 -11   3    1.50    0.50
  11   4   3    3.10    0.50
  11   3  -3    2.40    0.50
   3 -11  -3    2.70    0.60
   3 -11   3    2.70    0.50
   3 -11   3    2.30    0.60
  11   3   3    3.10    0.50
   2 -11  -3    3.20    0.60
   2 -11  -3    2.90    0.60
  11   2  -3    3.80    0.60
  11   2  -3    3.60    0.60
  11   2   3    3.30    0.60
   2 -11   3    2.20    0.50
   2 -11   3    3.00    0.50
  11   1  -3    2.80    0.60
   1 -11  -3    3.30    0.60
  11   1  -3    2.90    0.50
   1 -11  -3    3.80    0.60
  11   1   3    3.80    0.60
   1 -11   3    3.20    0.60
  11   1   3    3.60    0.60
  11   0  -3   25.10    1.80
  11   0  -3   25.60    1.50
   0 -11  -3   25.30    1.50
  11   0  -3   24.00    1.40
  11   0   3   27.20    1.50
  11   0   3   27.40    1.50
   0 -11   3   24.80    1.50
  11  -1  -3    3.70    0.60
  11  -1  -3    3.20    0.80
  11  -1  -3    3.80    0.60
  -1 -11  -3    3.00    0.60
  11  -1   3    3.60    0.60
  11  -1   3    3.00    0.60
  -1 -11   3    2.70    0.50
  11  -2  -3    2.90    0.60
  11  -2  -3    3.30    0.50
  -2 -11  -3    3.60    0.50
  11  -2  -3    2.90    0.80
  -2 -11   3    3.20    0.50
  11  -2   3    3.50    0.60
  11  -2   3    2.90    0.60
  11  -3  -3    3.70    0.50
  11  -3  -3    2.80    0.60
  11  -3  -3    3.30    0.70
  11  -3   3    2.30    0.50
  11  -3   3    1.70    0.50
  -3 -11   3    2.70    0.50
  11  -4  -3    2.90    0.60
  11  -4  -3    2.90    0.50
  11  -4   3    1.80    0.50
  11  -4   3    2.50    0.50
  -4 -11   3    2.70    0.50
  11  -5  -3    5.10    0.60
  11  -5  -3    5.80    0.70
  11  -5   3    5.00    0.70
  11  -5   3    5.70    0.70
   5  11   3    5.20    0.60
   5  11   3    5.10    0.60
   6  11  -3    2.50    0.50
   6  11  -3    2.60    0.50
  11  -6  -3    3.30    0.50
  11  -6   3    2.30    0.50
  11  -6   3    1.70    0.40
   6  11   3    2.70    0.50
   6  11   3    2.80    0.50
   7  11  -3    1.80    0.40
   7  11  -3    2.20    0.40
  11  -7   3    3.10    0.40
   7  11   3    3.10    0.40
  11  -7   3    3.20    0.60
   7  11   3    2.80    0.40
   5 -12  -3    2.30    0.40
  12   5  -3    2.30    0.40
   5 -12   3    3.10    0.50
  12   5   3    2.70    0.40
  12   4  -3    3.10    0.50
   4 -12  -3    3.30    0.50
  12   4   3    5.10    0.60
   4 -12   3    3.50    0.50
  12   3  -3    0.50    0.40
   3 -12  -3    0.70    0.40
   3 -12   3    0.20    0.40
  12   3   3    1.00    0.40
   2 -12  -3   11.80    0.90
  12   2  -3   11.70    0.90
  12   2   3   10.50    0.90
   2 -12   3   10.50    0.90
   1 -12  -3    3.80    0.60
  12   1  -3    3.80    0.50
  12   1  -3    3.50    0.50
  12   1   3    3.10    0.50
   1 -12   3    3.60    0.60
  12   0  -3   15.60    1.00
   0 -12  -3   17.00    1.10
  12   0  -3   15.70    1.10
  12   0   3   17.10    1.10
  12   0   3   16.00    1.10
   0 -12   3   17.40    1.10
  12  -1  -3    3.20    0.50
  -1 -12  -3    3.00    0.50
  12  -1  -3    3.20    0.50
  -1 -12   3    3.60    0.60
  12  -1   3    4.50    0.50
  12  -1   3    3.80    0.60
  12  -2  -3   10.90    0.90
  12  -2  -3   10.00    0.80
  -2 -12  -3   10.50    0.90
  12  -2   3   11.20    0.90
  12  -2   3   11.80    0.90
  -2 -12   3   10.80    0.90
  12  -3  -3    0.20    0.40
  12  -3  -3    0.10    0.40
  12  -3   3    0.30    0.40
  12  -3   3   -0.20    0.40
  -3 -12   3    0.40    0.40
  12  -4  -3    3.60    0.50
  12  -4  -3    4.00    0.50
  12  -4   3    3.40    0.50
   4  12   3    3.30    0.50
  12  -4   3    3.90    0.60
   4  12   3    4.80    0.60
  12  -5  -3    2.40    0.50
   5  12  -3    2.70    0.40
   5  12  -3    2.80    0.40
   5  12   3    2.10    0.40
   5  12   3    2.10    0.40
  12  -5   3    1.90    0.40
  12  -5   3    1.80    0.40
   6  12  -3    0.90    0.30
  12  -6   3    1.00    0.40
   6  12   3    0.70    0.30
  13   3  -3    0.10    0.30
  13   3   3    1.00    0.30
  13   2  -3    2.00    0.40
  13   2   3    2.70    0.40
  13   1  -3    3.80    0.50
  13   1  -3    2.70    0.40
   1 -13   3    3.40    0.50
  13   1   3    4.50    0.60
  13   0  -3    1.40    0.40
  13   0  -3    2.90    0.50
  13   0   3    1.90    0.40
   0 -13   3    2.40    0.40
  13   0   3    1.60    0.40
  13  -1  -3    5.00    0.60
  13  -1  -3    4.00    0.50
  -1 -13   3    3.80    0.50
  13  -1   3    2.80    0.40
  13  -1   3    3.60    0.50
  13  -2  -3    2.10    0.40
  13  -2  -3    1.90    0.30
  13  -2   3    2.50    0.40
  13  -2   3    2.40    0.40
  13  -3  -3    0.40    0.30
  13  -3   3    0.30    0.40
   3  13   3    0.50    0.30
  13  -3   3    1.00    0.30
   4  13  -3    0.30    0.30
   4  13   3   -0.30    0.30
   0   0   4   20.60    1.40
   1   0   4 1680.43   93.39
   1  -1  -4   65.79    3.20
   1   1   4   60.59    4.00
   1  -2  -4   58.69    2.80
   2   1   4   62.29    3.60
   0  -2  -4  978.20   42.60
   2   0  -4  981.00   42.60
   2   0   4  937.21   53.69
   2  -1  -4   63.09    2.90
   2  -2  -4   17.10    1.10
   3   2  -4  579.64   27.20
   2  -3  -4  529.55   24.20
   3   2   4  509.75   30.40
   3   2   4  556.44   27.20
   3   1  -4   43.70    2.00
   1  -3  -4   45.90    2.10
   3   1   4   39.80    2.40
   3   1   4   41.00    2.70
   0  -3  -4   32.10    1.70
   3   0  -4   34.60    2.00
   3   0  -4   33.00    1.60
   3   0   4   33.80    2.20
  -1  -3  -4   44.60    2.30
   3  -1  -4   51.89    2.30
   2   3  -4  536.65   26.50
  -2  -3  -4  499.95   23.50
   3  -2  -4  543.95   23.60
   2   3   4  543.05   26.50
   3   3  -4  281.87   13.80
   3  -3  -4  264.47   12.20
   3  -3  -4  273.57   14.40
   3  -3   4  254.47   14.40
   3   3   4  284.97   13.80
   3  -4  -4  123.39    6.70
   4   3  -4  111.09    6.50
   3  -4  -4  115.89    5.80
   4   3   4  134.99    6.60
   4   3   4  123.89    7.40
   3  -4   4  134.79    6.80
   2  -4  -4  187.58    8.40
   4   2  -4  186.78    9.50
   2  -4  -4  179.78    9.80
   4   2   4  189.78    9.50
   2  -4   4  185.28    9.80
   4   2   4  176.08   10.60
   1  -4  -4   52.19    2.60
   4   1  -4   53.69    2.90
   4   1   4   50.19    3.20
   1  -4   4   44.20    2.80
   4   1   4   56.69    2.90
   4   0  -4  188.48    8.30
   4   0  -4  184.08    9.40
   0  -4  -4  181.48    8.30
   4   0   4  177.88   10.50
   4   0   4  187.78    9.40
   4  -1  -4   50.89    2.60
  -1  -4  -4   54.59    2.60
   1   4  -4   53.69    3.00
   4  -2  -4  197.68   10.30
   4  -2  -4  191.18    8.70
   2   4  -4  188.58    9.80
   4  -2   4  189.98   10.30
   2   4   4  193.58    9.80
   3   4  -4  127.69    6.50
   4  -3  -4  131.79    6.70
   4  -3  -4  124.39    5.70
   3   4   4  114.89    6.40
   4  -3   4  113.59    6.60
   4  -4  -4  451.85   20.10
   4   4  -4  448.06   22.60
   4  -4  -4  436.86   23.70
   4  -4   4  439.06   23.70
   4   4   4  441.26   22.60
   4   4   4  465.95   25.40
   4  -5  -4   67.29    3.40
   4  -5  -4   70.69    4.00
   5   4  -4   74.89    4.10
   4  -5  -4   68.69    3.60
   5   4   4   60.59    4.00
   5   4   4   67.69    4.50
   4  -5   4   71.19    4.00
   5   3  -4   41.00    2.60
   5   3  -4   34.40    2.10
   3  -5  -4   40.70    2.30
   3  -5  -4   37.50    2.40
   5   3   4   42.30    2.60
   3  -5   4   45.30    2.40
   5   3   4   39.70    2.80
   5   2  -4   36.20    2.30
   2  -5  -4   39.80    2.00
   2  -5  -4   40.60    2.20
   2  -5   4   34.00    2.10
   5   2   4   29.90    2.50
   5   2   4   32.90    2.30
   1  -5  -4  387.36   21.70
   1  -5  -4  450.05   18.40
   5   1  -4  413.56   20.70
   5   1   4  420.26   20.70
   1  -5   4  410.56   21.70
   5   1   4  383.76   23.20
   0  -5  -4    3.90    0.60
   5   0  -4    5.10    0.70
   0  -5  -4    3.80    0.50
   0  -5   4    5.40    0.60
   5   0   4    4.10    0.80
   5   0   4    4.90    0.80
   5  -1  -4  408.66   18.30
   1   5  -4  393.46   20.60
  -1  -5  -4  416.66   21.60
   5  -1   4  406.26   21.70
  -1  -5   4  418.56   21.60
   5  -2  -4   35.00    2.10
  -2  -5  -4   29.50    2.00
   2   5  -4   33.30    2.20
   5  -2  -4   33.00    1.90
   5  -2   4   40.50    2.10
   2   5   4   37.30    2.10
  -2  -5   4   32.80    2.10
   5  -3  -4   43.80    2.30
   5  -3  -4   44.20    2.20
   3   5  -4   44.70    2.70
   5  -3  -4   44.30    2.60
   5  -3   4   40.60    2.60
   3   5   4   37.20    2.60
   5  -4  -4   64.59    3.30
   5  -4  -4   66.89    3.40
   4   5  -4   70.19    3.90
   5  -4  -4   63.69    3.80
   4   5   4   66.79    3.90
   5  -4   4   66.69    3.80
   5   5  -4  489.85   25.60
   5  -5  -4  506.65   26.80
   5  -5  -4  512.75   22.80
   5  -5  -4  510.25   22.90
   5   5   4  493.45   25.60
   5  -5   4  507.05   26.80
   5   5   4  511.65   28.70
   6   5  -4   22.40    2.00
   5  -6  -4   20.50    1.40
   5  -6  -4   22.40    1.70
   6   5   4   22.90    2.00
   5  -6   4   21.00    1.70
   6   5   4   22.30    2.10
   6   4  -4   27.50    2.20
   4  -6  -4   29.30    2.00
   4  -6  -4   27.90    1.70
   4  -6  -4   29.90    2.00
   6   4   4   29.80    2.40
   4  -6   4   28.70    2.00
   6   4   4   28.00    2.20
   3  -6  -4  162.98    7.60
   6   3  -4  159.78    7.60
   3  -6  -4  163.18    7.70
   3  -6  -4  171.28    8.80
   6   3  -4  156.78    8.60
   6   3   4  159.28    8.70
   6   3   4  159.08    9.60
   3  -6   4  162.68    8.80
   2  -6  -4   40.40    2.90
   2  -6  -4   51.59    2.60
   6   2  -4   54.39    3.10
   2  -6  -4   49.00    2.70
   6   2  -4   54.79    2.60
   2  -6   4   52.79    3.00
   6   2   4   50.89    2.60
   6   2   4   48.30    3.10
   6   1  -4   39.30    2.80
   6   1  -4   46.20    2.40
   1  -6  -4   47.10    2.50
   1  -6  -4   49.10    2.70
   1  -6   4   49.80    2.80
   6   1   4   45.80    2.90
   6   1   4   48.50    2.40
   0  -6  -4  129.69    6.80
   0  -6  -4  117.39    5.90
   6   0  -4  117.09    6.60
   6   0  -4  130.09    5.90
   0  -6   4  132.29    6.80
   6   0   4  120.89    5.80
   6   0   4  123.19    6.70
  -1  -6  -4   45.90    2.70
   6  -1  -4   50.29    2.40
  -1  -6  -4   48.90    2.50
   6  -1   4   48.10    2.40
  -1  -6   4   45.50    2.80
   2   6  -4   54.49    3.00
   6  -2  -4   48.20    2.50
   6  -2  -4   48.40    2.60
   6  -2   4   48.50    2.90
  -2  -6   4   48.10    2.90
   6  -2   4   48.50    2.50
   6  -3  -4  159.38    7.80
   3   6  -4  170.78    8.90
   6  -3  -4  167.68    9.20
   6  -3  -4  175.78    7.90
   6  -3   4  159.68    9.10
  -3  -6   4  173.98    9.10
   4   6  -4   30.20    2.20
   6  -4  -4   29.20    1.70
   6  -4  -4   30.60    2.00
   6  -4  -4   31.50    2.10
   6  -4   4   27.70    2.00
   4   6   4   30.10    2.20
   6  -5  -4   21.50    1.70
   6  -5  -4   21.90    1.40
   5   6  -4   20.80    1.90
   5   6   4   21.90    2.20
   5   6   4   21.40    1.90
   6  -5   4   22.10    1.70
   6   6  -4    9.00    1.50
   6  -6  -4    6.50    1.00
   6  -6  -4    5.80    0.80
   6   6   4    5.00    1.20
   6  -6   4    8.60    1.20
   7   6  -4   92.79    6.00
   7   6  -4   95.99    4.60
   6  -7  -4   98.29    5.90
   6  -7  -4   98.99    4.60
   6  -7  -4   99.79    4.80
   6  -7   4  107.99    4.60
   6  -7   4  110.99    4.60
   6  -7   4  106.39    5.90
   7   6   4  105.49    6.10
   6  -7   4  103.69    4.80
   6  -7   4  107.59    4.80
   7   6   4   88.89    4.60
   5  -7  -4   44.20    2.90
   7   5  -4   43.00    3.20
   7   5   4   46.80    3.20
   5  -7   4   45.80    2.90
   4  -7  -4   18.80    1.50
   7   4  -4   16.60    1.90
   4  -7   4   18.80    1.50
   7   4   4   16.30    1.80
   3  -7  -4  191.38    9.40
   7   3  -4  201.38   10.60
   7   3  -4  207.18    9.30
   3  -7  -4  208.08   10.80
   3  -7   4  185.58   10.80
   7   3   4  203.08   10.70
   7   2  -4   35.10    2.40
   7   2  -4   34.10    1.90
   2  -7  -4   37.30    2.20
   2  -7  -4   31.20    1.90
   2  -7  -4   34.80    2.10
   2  -7   4   31.00    2.10
   7   2   4   29.40    2.40
   1  -7  -4   38.90    2.30
   7   1  -4   38.10    2.50
   7   1  -4   40.80    2.10
   1  -7  -4   39.80    2.00
   7   1   4   32.90    2.00
   7   1   4   35.40    2.50
   1  -7   4   33.20    2.30
   0  -7  -4    9.00    1.00
   0  -7  -4   10.60    0.90
   7   0  -4   10.40    0.90
   7   0   4    7.30    1.20
   7   0   4    9.70    0.90
   0  -7   4   10.00    1.00
  -1  -7  -4   32.40    2.00
  -1  -7  -4   31.10    2.10
   7  -1  -4   35.20    2.00
   7  -1   4   41.20    2.00
  -1  -7   4   40.10    2.30
   7  -2  -4   33.50    1.90
  -2  -7  -4   33.10    2.00
   7  -2   4   32.70    1.90
  -2  -7   4   36.20    2.20
   7  -3  -4  193.78    9.00
   3   7  -4  188.88   10.20
  -3  -7   4  195.58   10.50
   4   7  -4   15.90    1.80
   7  -4  -4   20.30    1.40
   7  -4   4   21.50    1.70
  -4  -7   4   19.20    1.60
   7  -5  -4   45.30    2.50
   5   7  -4   45.60    3.20
   7  -5  -4   50.29    3.10
  -5  -7   4   43.20    2.90
   5   7   4   45.70    3.10
   7  -5   4   46.30    3.00
   6   7  -4  105.49    6.00
   7  -6  -4  108.69    4.70
   7  -6  -4  110.89    5.90
   7  -6  -4   99.59    4.90
   7  -6   4   97.29    4.70
   6   7   4  100.79    5.90
   7  -6   4   98.69    4.70
   7  -6   4   96.69    4.70
   7  -6   4   94.89    4.50
   7  -6   4   95.19    4.50
   7  -6   4  102.69    5.90
  -6  -7   4   90.39    5.70
   7  -7  -4   18.20    1.70
   7  -7  -4   14.60    1.20
   7  -7  -4   15.50    1.20
   7   7  -4   15.60    1.20
   7  -7  -4   14.40    1.10
   7   7  -4   17.10    1.90
   7  -7   4   13.90    1.20
   7   7   4   16.00    1.20
   7  -7   4   15.70    1.70
   7  -7   4   15.10    1.20
   7  -7   4   14.20    1.10
   7   7   4   17.60    2.00
   7   7   4   16.00    1.20
   7  -7   4   16.00    1.10
   7  -8  -4    9.90    1.00
   8   7  -4   10.00    1.10
   7  -8  -4    9.70    1.40
   7  -8  -4   10.90    1.00
   7  -8   4   10.70    1.00
   8   7   4    8.00    1.00
   7  -8   4    9.60    1.00
   7  -8   4   10.00    1.00
   8   7   4    7.90    1.00
   7  -8   4   10.40    1.40
   7  -8   4   11.40    1.00
   8   6  -4    2.80    1.00
   6  -8  -4    1.20    0.50
   8   6  -4    2.20    0.60
   6  -8  -4    0.10    0.80
   6  -8  -4    2.60    0.60
   8   6   4    0.20    0.90
   6  -8   4    2.30    0.60
   6  -8   4    2.20    0.80
   6  -8   4    1.10    0.50
   8   6   4    0.30    0.50
   8   6   4    1.00    0.50
   6  -8   4    1.40    0.60
   6  -8   4    1.60    0.60
   8   5  -4   76.99    5.20
   5  -8  -4   78.79    3.90
   5  -8  -4   84.99    5.00
   5  -8  -4   80.59    4.10
   8   5  -4   79.99    3.90
   8   5   4   86.69    5.20
   8   5   4   84.49    3.90
   5  -8   4   91.09    5.10
   8   5   4   86.79    3.90
   5  -8   4   87.99    3.90
   5  -8   4   84.39    4.00
   5  -8   4   89.99    3.90
   5  -8   4   88.29    4.10
   8   4  -4   28.80    2.40
   4  -8  -4   29.00    2.10
   8   4  -4   29.10    1.60
   4  -8  -4   28.10    1.50
   4  -8  -4   27.60    1.60
   8   4   4   26.40    2.40
   4  -8   4   30.20    2.10
   8   4   4   27.40    1.50
   4  -8   4   26.50    1.50
   4  -8   4   23.40    1.50
   4  -8   4   24.50    1.60
   3  -8  -4   27.00    1.80
   3  -8  -4   23.90    1.40
   8   3  -4   26.90    2.20
   3  -8   4   22.30    1.30
   3  -8   4   24.50    1.80
   8   3   4   20.60    2.10
   8   2  -4   26.80    2.20
   2  -8  -4   26.60    1.90
   2  -8  -4   27.50    1.40
   8   2  -4   26.90    1.70
   8   2   4   28.40    2.30
   2  -8   4   27.60    1.90
   2  -8   4   25.10    1.40
   1  -8  -4  118.89    6.80
   8   1  -4  135.49    6.00
   8   1  -4  128.09    6.90
   8   1   4  122.59    6.90
   8   1   4  122.69    5.90
   1  -8   4  114.19    6.80
   0  -8  -4   33.10    2.10
   8   0  -4   33.90    2.00
   0  -8   4   31.30    2.20
   8   0   4   38.00    2.00
  -1  -8  -4  114.69    5.60
   8  -1  -4  106.89    5.50
   8  -1   4  119.89    5.50
  -1  -8   4  116.79    6.40
  -2  -8  -4   24.00    1.80
   8  -2  -4   29.30    1.70
  -2  -8   4   27.40    1.90
  -2  -8   4   28.50    1.50
   8  -2   4   27.50    1.60
   8  -3  -4   19.60    1.50
  -3  -8  -4   22.20    1.70
  -3  -8   4   22.90    1.20
  -3  -8   4   21.30    1.60
   8  -4  -4   28.00    1.70
   8  -4  -4   26.00    1.50
  -4  -8   4   28.50    1.50
   8  -4   4   26.00    1.50
  -4  -8   4   25.20    1.90
   8  -5  -4   82.79    4.10
   8  -5  -4   85.69    3.90
   8  -5  -4   83.19    3.90
   8  -5  -4   81.79    3.70
   8  -5   4   78.59    3.90
  -5  -8   4   78.29    4.70
   8  -5   4   77.29    3.90
   8  -5   4   81.79    3.80
   8  -6  -4    1.40    0.50
   8  -6  -4    0.50    0.50
   8  -6  -4    1.50    0.50
   6   8  -4    0.30    0.90
   8  -6   4    1.50    0.50
   8  -6   4    1.10    0.50
   8  -6   4    1.80    0.60
   6   8   4    0.40    0.50
   6   8   4    0.30    0.50
   8  -6   4    1.50    0.60
   8  -6   4    1.60    0.90
   8  -6   4    2.80    0.50
   7   8  -4    9.50    1.00
   8  -7  -4    7.90    1.00
   8  -7   4    9.50    1.10
   8  -7   4   10.40    1.00
   7   8   4    8.80    1.00
   7   8   4    8.80    1.00
   8  -7   4   12.30    1.00
   8  -7   4   11.00    1.00
   8  -7   4   10.40    1.40
   8  -7   4   11.40    1.00
   8   8  -4   17.10    1.20
   8  -8  -4   16.10    1.10
   8  -8  -4   16.60    1.20
   8  -8   4   17.70    1.20
   8   8   4   15.30    1.20
   8  -8   4   16.20    1.20
   8  -8   4   17.30    1.20
   8   8   4   16.40    1.10
   8  -8   4   17.10    1.20
   9   8  -4    0.30    0.50
   8  -9  -4   -0.10    0.40
   8  -9  -4    0.30    0.40
   9   8   4    0.20    0.40
   8  -9   4    0.60    0.50
   9   8   4    0.00    0.40
   9   7  -4    1.70    0.60
   7  -9  -4    1.70    0.50
   7  -9  -4    1.50    0.50
   7  -9   4    2.20    0.50
   7  -9   4    2.00    0.60
   9   7   4    1.80    0.50
   9   7   4    1.80    0.50
   6  -9  -4   39.90    2.10
   6  -9  -4   40.20    2.00
   9   6  -4   40.50    2.10
   6  -9   4   39.40    2.10
   9   6   4   40.40    2.00
   9   6   4   37.40    2.00
   6  -9   4   38.40    2.10
   6  -9   4   37.00    2.00
   5  -9  -4   20.20    1.80
   5  -9  -4   18.60    1.30
   5  -9  -4   20.00    1.40
   9   5  -4   21.10    1.40
   5  -9   4   18.10    1.30
   5  -9   4   18.80    1.30
   5  -9   4   18.50    1.30
   5  -9   4   21.00    1.80
   5  -9   4   19.80    1.30
   9   5   4   20.00    1.30
   4  -9  -4   28.10    1.50
   4  -9  -4   28.30    1.60
   9   4  -4   26.70    1.60
   4  -9  -4   26.20    1.60
   9   4  -4   23.60    2.40
   4  -9  -4   28.00    2.10
   4  -9   4   26.00    1.60
   4  -9   4   25.50    2.10
   4  -9   4   23.80    1.50
   4  -9   4   24.20    1.50
   9   4   4   27.00    2.50
   9   4   4   27.30    1.50
   3  -9  -4   54.19    2.60
   3  -9  -4   53.49    2.60
   3  -9  -4   54.59    2.70
   3  -9  -4   53.89    3.40
   9   3  -4   57.79    2.70
   9   3  -4   51.79    3.60
   9   3   4   53.69    2.60
   3  -9   4   51.99    2.70
   9   3   4   49.70    3.70
   3  -9   4   51.29    2.60
   3  -9   4   52.99    2.60
   3  -9   4   55.19    3.40
   9   2  -4   31.40    2.00
   9   2  -4   31.90    2.60
   2  -9  -4   32.60    1.70
   2  -9  -4   27.90    2.20
   9   2  -4   31.90    1.70
   2  -9  -4   31.70    1.70
   9   2  -4   30.70    1.70
   9   2   4   34.80    1.70
   2  -9   4   32.20    1.80
   2  -9   4   33.10    1.70
   2  -9   4   33.90    1.70
   9   1  -4   17.60    1.20
   9   1  -4   15.40    1.30
   9   1  -4   15.00    1.20
   1  -9  -4   16.90    1.50
   1  -9  -4   18.00    1.20
   1  -9  -4   17.40    1.10
   9   1   4   17.60    1.10
   1  -9   4   14.50    1.40
   1  -9   4   18.00    1.10
   9   0  -4   17.00    1.10
   9   0  -4   16.20    1.20
   0  -9  -4   17.00    1.10
   0  -9  -4   17.20    1.10
   9   0  -4   15.40    1.30
   0  -9   4   14.40    1.40
   9   0   4   16.20    1.40
   9   0   4   17.80    1.10
   0  -9   4   17.80    1.10
   9  -1  -4   15.70    1.10
  -1  -9  -4   15.70    1.10
   9  -1  -4   17.40    1.10
   9  -1  -4   16.50    1.30
  -1  -9   4   16.80    1.10
   9  -1   4   16.30    1.30
   9  -1   4   17.70    1.10
   9  -1   4   17.20    1.10
  -1  -9   4   15.50    1.40
   9  -2  -4   36.80    1.80
  -2  -9  -4   33.00    1.70
   9  -2  -4   33.00    2.00
   9  -2  -4   33.10    1.70
   9  -2   4   32.10    1.80
  -2  -9   4   32.00    1.70
  -2  -9   4   32.30    2.20
   9  -2   4   32.00    2.00
   9  -2   4   31.10    1.70
   9  -3  -4   46.90    2.50
   9  -3  -4   52.69    2.90
   9  -3  -4   51.49    2.60
  -3  -9   4   53.99    2.50
   9  -3   4   55.49    2.70
  -3  -9   4   53.09    3.30
   9  -3   4   55.29    2.60
   9  -4  -4   23.90    1.50
   9  -4  -4   24.30    1.40
   9  -4  -4   24.30    1.70
  -4  -9   4   26.60    1.40
   9  -4   4   23.90    1.40
  -4  -9   4   26.50    1.90
   9  -4   4   24.80    1.60
   9  -4   4   25.00    1.40
   9  -5  -4   19.30    1.40
   9  -5  -4   21.00    1.50
   9  -5  -4   19.80    1.30
   9  -5  -4   19.50    1.20
  -5  -9  -4   20.40    1.80
   9  -5   4   18.40    1.30
   9  -5   4   20.60    1.40
   9  -5   4   19.30    1.30
   9  -6  -4   37.40    2.10
  -6  -9  -4   41.80    2.50
   9  -6  -4   38.00    2.10
   6   9   4   40.30    2.00
   9  -6   4   36.80    2.00
   6   9   4   42.90    2.10
   9  -6   4   37.20    2.10
   9  -6   4   39.10    2.00
   7   9  -4    2.00    0.50
   9  -7  -4    2.00    0.50
   7   9  -4    2.70    0.60
  -7  -9  -4    1.10    0.90
   9  -7   4    2.00    0.60
   9  -7   4    2.30    0.50
   7   9   4    2.20    0.60
   7   9   4    1.40    0.50
   9  -7   4    3.00    0.60
   9  -7   4    2.10    0.50
   9  -8  -4    0.60    0.40
   8   9  -4   -0.30    0.40
   9  -8   4    0.10    0.40
   8   9   4   -0.10    0.40
   8   9   4    0.30    0.40
   9  -8   4   -0.10    0.40
   9  -8   4    0.30    0.40
   9  -9  -4    1.10    0.40
   9   9  -4    1.00    0.40
   9   9   4    1.00    0.40
   9   9   4    0.10    0.40
   8 -10  -4    3.60    0.50
  10   8  -4    2.60    0.50
   8 -10  -4    2.90    0.50
  10   8   4    3.60    0.50
   7 -10  -4    0.40    0.50
  10   7  -4    0.80    0.50
   7 -10  -4    0.80    0.40
   7 -10   4    0.30    0.40
  10   7   4    1.00    0.40
  10   6  -4   21.00    1.30
   6 -10  -4   22.00    1.40
   6 -10  -4   21.40    1.30
  10   6   4   22.70    1.30
   6 -10   4   22.00    1.30
   6 -10   4   23.20    1.40
  10   5  -4    3.70    0.60
   5 -10  -4    3.20    0.60
   5 -10  -4    2.80    0.60
  10   5   4    4.20    0.60
   5 -10   4    3.40    0.60
   5 -10   4    3.70    0.60
  10   4  -4    4.50    0.60
   4 -10  -4    3.30    0.60
   4 -10  -4    4.00    0.70
   4 -10   4    4.10    0.70
  10   4   4    4.90    0.70
   4 -10   4    5.80    0.70
   4 -10   4    5.10    0.70
  10   3  -4   26.60    1.50
   3 -10  -4   26.00    2.00
   3 -10  -4   26.30    1.60
   3 -10  -4   25.00    1.50
   3 -10   4   25.50    1.50
  10   3   4   27.00    1.50
   3 -10   4   26.00    2.00
   3 -10   4   23.00    1.50
  10   2  -4    8.80    0.90
  10   2  -4   10.40    0.90
   2 -10  -4    8.00    0.90
   2 -10  -4    9.30    1.00
   2 -10   4    9.90    0.90
   2 -10   4    8.10    0.90
   2 -10   4   10.30    1.30
  10   2   4   10.20    0.90
   1 -10  -4    4.00    0.60
  10   1  -4    4.30    0.60
  10   1  -4    3.50    0.60
   1 -10  -4    4.20    0.60
  10   1  -4    4.80    0.90
   1 -10   4    2.90    0.90
   1 -10   4    3.30    0.60
  10   1   4    4.20    0.60
   0 -10  -4   46.70    2.30
  10   0  -4   45.70    2.30
  10   0  -4   42.30    2.30
  10   0  -4   46.40    2.60
   0 -10   4   47.00    2.30
   0 -10   4   45.60    2.90
  10   0   4   46.40    2.30
  10   0   4   46.60    2.30
  10  -1  -4    2.50    0.80
  10  -1  -4    3.30    0.60
  -1 -10  -4    2.40    0.50
  10  -1  -4    3.50    0.60
  -1 -10   4    3.30    0.80
  10  -1   4    2.40    0.80
  -1 -10   4    3.40    0.50
  10  -1   4    3.80    0.60
  10  -1   4    3.90    0.60
  -2 -10  -4    9.20    0.90
  10  -2  -4    7.70    1.00
  10  -2  -4    8.40    1.00
  10  -2  -4    8.00    0.80
  10  -2   4    8.20    0.90
  -2 -10   4    9.20    1.20
  10  -2   4    9.00    0.90
  -2 -10   4    9.30    0.90
  10  -3  -4   23.50    1.40
  10  -3  -4   25.50    1.70
  10  -3  -4   25.30    1.60
  10  -3   4   26.30    1.50
  -3 -10   4   25.90    1.50
  10  -3   4   27.50    1.60
  -3 -10   4   28.20    1.90
  10  -4  -4    4.00    0.80
  10  -4  -4    4.90    0.70
  10  -4  -4    4.60    0.60
  -4 -10   4    4.50    0.60
  10  -4   4    5.20    0.60
  10  -4   4    3.30    0.60
  10  -5  -4    2.60    0.60
  10  -5  -4    2.80    0.50
  10  -5   4    3.30    0.60
  10  -5   4    4.10    0.60
  10  -5   4    2.40    0.60
   6  10  -4   20.20    1.30
  10  -6  -4   19.90    1.30
  10  -6   4   20.60    1.30
   6  10   4   21.40    1.30
  10  -6   4   21.10    1.30
  10  -6   4   21.30    1.30
   6  10   4   19.30    1.30
   7  10  -4    1.20    0.50
  10  -7  -4   -0.10    0.40
   7  10  -4    0.70    0.40
  10  -7   4    0.80    0.50
  10  -7   4    1.00    0.40
   7  10   4    0.40    0.40
   7  10   4    0.40    0.40
  10  -7   4    0.90    0.40
  10  -8  -4    3.40    0.50
   8  10  -4    3.00    0.50
   8  10   4    3.20    0.50
   8  10   4    2.70    0.50
  10  -8   4    3.20    0.50
   7 -11  -4    3.30    0.50
   7 -11  -4    2.80    0.50
  11   7  -4    2.60    0.40
  11   7   4    4.10    0.50
  11   6  -4    1.70    0.40
   6 -11  -4    1.60    0.50
   6 -11  -4    2.30    0.50
  11   6   4    1.60    0.40
   6 -11   4    1.30    0.40
   5 -11  -4    5.60    0.70
  11   5  -4    6.60    0.70
   5 -11  -4    6.80    0.80
   5 -11   4    5.60    0.70
  11   5   4    6.80    0.70
   4 -11  -4    5.40    0.70
   4 -11  -4    5.20    0.70
  11   4  -4    6.70    0.80
  11   4   4    8.90    0.80
   4 -11   4    7.80    0.80
  11   3  -4    3.60    0.60
   3 -11  -4    4.10    0.60
  11   3   4    3.30    0.50
   3 -11   4    3.20    0.60
   3 -11   4    4.80    0.60
   2 -11  -4   10.00    0.90
  11   2  -4    8.40    0.90
   2 -11  -4    9.50    0.90
  11   2  -4    8.90    0.90
   2 -11   4    7.50    0.80
   2 -11   4    8.60    0.90
  11   2   4    9.40    0.90
   1 -11  -4    3.80    0.60
   1 -11  -4    3.80    0.60
  11   1  -4    2.60    0.50
  11   1  -4    4.00    0.60
  11   1   4    3.60    0.60
   1 -11   4    3.90    0.60
  11   0  -4   26.90    1.50
  11   0  -4   25.60    1.80
   0 -11  -4   25.70    1.50
  11   0  -4   26.50    1.60
   0 -11   4   28.00    1.50
  11   0   4   25.00    1.50
  11   0   4   27.50    1.50
  11  -1  -4    2.20    0.80
  11  -1  -4    3.60    0.60
  11  -1  -4    2.90    0.50
  -1 -11  -4    3.10    0.50
  11  -1   4    4.10    0.60
  11  -1   4    3.40    0.60
  -1 -11   4    3.30    0.60
  -2 -11  -4    6.20    0.80
  11  -2  -4    8.20    0.80
  11  -2  -4    7.90    1.10
  11  -2  -4    9.00    0.90
  -2 -11   4    8.40    0.80
  11  -2   4    8.40    0.90
  11  -2   4    9.50    0.90
  11  -3  -4    3.90    0.50
  11  -3  -4    4.20    0.60
  11  -3  -4    4.10    0.80
  -3 -11   4    3.10    0.50
  11  -3   4    4.10    0.60
  11  -3   4    3.90    0.60
  11  -4  -4    8.00    0.90
  11  -4  -4    6.90    0.70
  11  -4   4    6.00    0.70
  -4 -11   4    6.10    0.70
  11  -4   4    5.40    0.70
  11  -5  -4    6.50    0.80
  11  -5   4    5.50    0.70
   5  11   4    6.30    0.80
   5  11   4    5.80    0.70
  11  -5   4    6.40    0.70
   6  11  -4    1.60    0.50
  11  -6  -4    1.20    0.50
   6  11  -4    1.90    0.50
   6  11   4    2.50    0.40
   6  11   4    1.90    0.50
  11  -6   4    1.60    0.40
  11  -6   4    1.60    0.50
  11  -6   4    1.50    0.40
   7  11  -4    2.90    0.40
   7  11  -4    3.20    0.40
   7  11   4    3.30    0.40
  11  -7   4    3.10    0.40
   7  11   4    3.30    0.40
  11  -7   4    2.50    0.60
   5 -12  -4    4.90    0.60
  12   5  -4    4.40    0.60
  12   5   4    5.00    0.60
   5 -12   4    4.70    0.60
  12   4  -4    2.30    0.40
   4 -12  -4    2.30    0.50
  12   4   4    2.80    0.40
   4 -12   4    2.00    0.40
   3 -12  -4    0.30    0.40
  12   3  -4    0.80    0.40
  12   3   4    0.60    0.40
   3 -12   4   -0.10    0.40
  12   2  -4    1.10    0.40
  12   2  -4    1.10    0.40
   2 -12  -4    1.20    0.50
  12   2   4    1.00    0.40
   2 -12   4    1.50    0.50
   1 -12  -4    5.30    0.70
  12   1  -4    5.40    0.70
  12   1  -4    4.00    0.50
  12   1   4    6.00    0.70
   1 -12   4    4.10    0.60
  12   0  -4    6.30    0.70
   0 -12  -4    6.70    0.80
  12   0  -4    7.40    0.80
   0 -12   4    9.20    0.80
  12   0   4    7.80    0.80
  12   0   4    7.00    0.70
  12  -1  -4    5.30    0.70
  -1 -12  -4    5.70    0.70
  12  -1  -4    4.40    0.60
  12  -1   4    5.00    0.60
  -1 -12   4    4.80    0.60
  12  -1   4    4.30    0.60
  12  -2  -4    1.40    0.40
  12  -2  -4    1.00    0.50
  -2 -12  -4    1.60    0.40
  -2 -12   4    0.20    0.40
  12  -2   4    0.90    0.40
  12  -2   4    1.20    0.40
  12  -3  -4   -0.10    0.30
  12  -3  -4    0.50    0.50
  -3 -12   4    1.00    0.40
  12  -3   4    0.50    0.40
  12  -3   4    0.90    0.40
  12  -4  -4    2.00    0.50
   4  12   4    3.20    0.50
  -4 -12   4    2.40    0.40
  12  -4   4    2.10    0.40
  12  -4   4    1.90    0.50
   5  12  -4    4.10    0.50
  12  -5  -4    4.40    0.50
   5  12  -4    4.80    0.60
  12  -5   4    4.70    0.50
   5  12   4    4.40    0.50
  12  -5   4    3.80    0.50
   6  12  -4    2.40    0.40
  12  -6   4    1.90    0.40
   6  12   4    2.10    0.30
  13   3   4    0.20    0.30
  13   2  -4    0.00    0.30
  13   2   4    0.30    0.30
  13   1  -4    0.60    0.30
  13   1  -4    0.10    0.30
   1 -13   4    0.80    0.40
  13   1   4    0.30    0.30
  13   0  -4    2.00    0.40
  13   0  -4    2.20    0.40
   0 -13   4    1.80    0.40
  13   0   4    1.30    0.40
  13  -1  -4    0.40    0.40
  13  -1  -4    0.30    0.30
  13  -1   4    0.40    0.40
  -1 -13   4   -0.10    0.40
  13  -1   4    0.30    0.30
  13  -2  -4    0.30    0.40
   2  13   4    0.50    0.40
  13  -2   4    0.90    0.40
  13  -2   4    0.10    0.30
  13  -3  -4    0.40    0.30
  13  -3   4   -0.10    0.30
   3  13   4    0.30    0.30
  13  -3   4    0.00    0.30
   4  13   4    0.30    0.30
   0   0   5    0.40    0.20
   0   1   5    4.40    0.50
   1   0   5    4.10    0.50
   1   1   5  882.71   49.10
   1  -2  -5 1824.82   80.19
   2   1   5 1813.82  101.09
   2   0   5  589.24   32.90
   2  -1  -5 1795.32   79.19
   2  -2  -5 2225.98   99.99
   2   2   5 2310.17  125.99
   3   2  -5  814.02   38.10
   2  -3  -5  760.22   33.90
   3   2   5  764.82   38.10
   3   2   5  720.63   42.70
   3   1  -5  659.93   28.30
   1  -3  -5  645.74   28.50
   3   1   5  624.84   35.90
   3   1   5  635.94   32.00
   3   0  -5  716.43   31.00
   0  -3  -5  673.33   31.10
   3   0   5  717.23   39.20
  -1  -3  -5  635.74   29.30
   3  -1  -5  687.33   29.30
  -2  -3  -5  741.63   34.10
   2   3  -5  799.32   38.50
   3  -2  -5  778.02   34.20
   2   3   5  771.42   38.40
   3  -3  -5  528.15   26.70
   3   3  -5  528.45   25.40
   3  -3  -5  479.85   22.50
   3  -3   5  491.55   26.70
   3   3   5  496.85   28.40
   3   3   5  507.75   25.30
   4   3  -5  117.79    6.10
   3  -4  -5  117.89    5.40
   3  -4  -5  115.19    6.20
   3  -4   5  113.69    6.20
   4   3   5  109.09    6.80
   4   3   5  113.99    6.10
   4   2  -5  163.08    8.70
   2  -4  -5  174.58    7.70
   2  -4  -5  163.48    8.90
   2  -4   5  167.28    9.00
   4   2   5  164.98    9.70
   4   2   5  171.88    8.70
   4   1  -5  121.69    6.00
   1  -4  -5  111.99    5.30
   4   1   5  115.29    6.70
   1  -4   5  108.89    6.10
   4   1   5  113.29    6.00
   4   0  -5    0.80    0.40
   4   0  -5    1.50    0.40
   0  -4  -5    0.30    0.40
   0   4  -5    1.10    0.40
   4   0   5    2.80    0.60
   4   0   5    1.00    0.50
  -1  -4  -5  110.49    5.30
   1   4  -5  119.19    6.10
   4  -1  -5  114.89    5.30
  -1  -4   5  118.39    6.20
   4  -2  -5  171.08    9.20
   2   4  -5  165.58    8.80
   4  -2  -5  161.08    7.80
   2   4   5  175.38    8.70
   4  -2   5  177.38    9.10
   3   4  -5  112.69    6.20
   4  -3  -5  117.59    6.30
   4  -3  -5  114.99    5.50
   3   4   5  114.59    6.10
   4  -3   5  118.59    6.30
   4  -4  -5  101.69    5.90
   4  -4  -5  113.99    5.20
   4   4  -5  114.19    5.80
   4   4   5  103.19    6.50
   4   4   5   98.79    5.80
   4  -4   5  109.19    5.90
   4  -5  -5   27.90    2.00
   4  -5  -5   31.10    1.70
   5   4  -5   29.10    2.20
   4  -5  -5   31.40    2.00
   4  -5   5   31.70    2.00
   5   4   5   36.00    2.50
   5   4   5   31.70    2.20
   3  -5  -5   68.99    3.90
   5   3  -5   68.79    4.00
   3  -5  -5   71.09    3.50
   5   3  -5   67.59    3.40
   3  -5   5   71.19    3.90
   5   3   5   70.79    4.50
   5   3   5   66.69    4.00
   2  -5  -5  161.18    9.80
   2  -5  -5  177.78    8.40
   5   2  -5  169.18    9.50
   2  -5   5  198.58    9.80
   5   2   5  202.18    9.60
   5   2   5  191.88   10.70
   1  -5  -5  119.79    6.50
   5   1  -5  107.19    6.40
   1  -5  -5  118.09    5.70
   5   1   5  123.79    6.50
   1  -5   5  138.59    6.60
   5   1   5  118.69    7.20
   0  -5  -5  106.09    6.00
   5   0  -5  115.09    5.90
   0   5  -5  116.29    6.00
   0  -5  -5  108.69    5.20
   5   0   5  111.49    6.60
   0  -5   5  115.59    6.10
   5   0   5  112.79    6.00
  -1  -5  -5  125.39    6.70
   5  -1  -5  136.89    5.80
   1   5  -5  123.69    6.50
   5  -1   5  119.69    6.80
  -1  -5   5  116.89    6.70
   2   5  -5  190.28    9.10
   5  -2  -5  181.68    8.10
   5  -2   5  163.58    9.40
   2   5   5  165.48    9.00
   5  -3  -5   69.99    4.00
   3   5  -5   68.79    4.00
   5  -3  -5   72.19    3.50
   5  -3  -5   70.99    3.60
   3   5   5   72.39    4.00
   5  -3   5   69.49    4.00
   5  -4  -5   36.60    2.20
   5  -4  -5   35.10    1.90
   4   5  -5   34.90    2.40
   5  -4  -5   37.10    2.10
   5  -4   5   32.50    2.20
   4   5   5   31.10    2.30
   4   5   5   32.90    2.70
   5  -5  -5   30.60    1.90
   5   5  -5   21.30    2.10
   5  -5  -5   29.10    1.70
   5  -5  -5   29.70    2.00
   5   5   5   27.20    2.40
   5  -5   5   27.30    1.90
   5   5   5   27.60    2.10
   6   5  -5    8.70    1.40
   5  -6  -5    8.50    0.90
   5  -6  -5    7.60    1.00
   6   5   5    8.80    1.30
   6   5   5    6.90    1.30
   5  -6   5    8.80    1.10
   4  -6  -5    1.80    0.60
   6   4  -5    1.00    0.70
   4  -6  -5    1.60    0.50
   4  -6  -5    1.30    0.60
   6   4   5    1.40    0.80
   6   4   5    1.80    0.80
   4  -6   5    0.70    0.60
   3  -6  -5  263.57   12.20
   6   3  -5  262.27   13.80
   6   3  -5  279.37   12.20
   3  -6  -5  264.37   14.20
   3  -6  -5  274.27   12.30
   6   3   5  252.07   13.80
   6   3   5  262.67   15.40
   3  -6   5  266.37   14.20
   6   2  -5   49.90    2.30
   6   2  -5   48.20    2.90
   2  -6  -5   43.00    2.30
   2  -6  -5   43.60    2.50
   2  -6  -5   41.20    2.60
   6   2   5   41.20    2.80
   6   2   5   46.40    3.10
   2  -6   5   44.80    2.70
   1  -6  -5  338.87   15.40
   1  -6  -5  339.87   15.30
   6   1  -5  327.57   17.20
   6   1  -5  340.97   15.40
   1  -6  -5  327.37   17.90
   6   1   5  333.77   17.30
   6   1   5  352.16   15.40
   1  -6   5  344.27   18.00
   6   0  -5  114.09    6.30
   0  -6  -5  112.99    5.60
   0  -6  -5  120.69    5.60
   6   0  -5  119.69    5.60
   0  -6  -5  110.19    6.40
   6   0   5  120.89    6.40
   0  -6   5  122.69    6.50
   6   0   5  122.89    5.50
  -1  -6  -5  307.67   17.20
  -1  -6  -5  317.27   14.80
   6  -1  -5  323.77   14.80
   6  -1   5  330.57   14.70
  -1  -6   5  340.77   17.30
   6  -2  -5   40.00    2.30
   2   6  -5   40.90    2.70
   6  -2  -5   37.90    2.30
  -2  -6   5   49.10    2.60
   6  -2   5   46.10    2.20
   6  -2   5   45.10    2.70
   6  -3  -5  259.47   12.30
   6  -3  -5  284.17   12.30
   3   6  -5  262.07   13.80
   6  -3   5  274.07   14.40
  -3  -6   5  261.87   14.40
   6  -4  -5    2.00    0.60
   6  -4  -5    2.10    0.70
   6  -4  -5    1.00    0.70
   4   6  -5    2.30    0.80
   6  -4   5    1.30    0.60
   4   6   5    2.80    1.00
   4   6   5    1.70    0.80
   6  -5  -5    6.90    1.10
   6  -5  -5    7.80    0.90
   5   6  -5    8.10    1.30
   6  -5   5    7.90    1.10
   5   6   5    7.70    1.40
   5   6   5    8.40    1.30
   6  -6  -5  114.39    5.80
   6  -6  -5  113.69    6.90
   6   6  -5  128.39    7.00
   6  -6   5  130.49    6.90
   6   6   5  123.69    6.90
   7   6  -5   40.10    1.90
   6  -7  -5   32.90    2.40
   6  -7  -5   33.60    1.90
   7   6  -5   43.10    2.90
   6  -7  -5   30.50    1.80
   6  -7  -5   36.20    1.80
   7   6   5   32.40    2.70
   7   6   5   31.80    1.90
   6  -7   5   29.60    1.80
   6  -7   5   32.40    1.80
   7   6   5   33.50    1.80
   6  -7   5   32.10    1.80
   6  -7   5   30.40    1.80
   6  -7   5   34.20    2.40
   7   5  -5   40.30    3.10
   5  -7  -5   44.20    2.90
   5  -7   5   45.60    2.90
   7   5   5   47.70    3.20
   4  -7  -5  121.49    6.00
   4  -7  -5  126.09    7.10
   7   4  -5  134.99    7.20
   7   4   5  127.09    7.10
   4  -7   5  123.69    7.10
   7   3  -5   84.29    5.10
   3  -7  -5   88.49    4.50
   3  -7  -5   85.89    4.30
   3  -7  -5   92.59    5.00
   7   3  -5   83.09    4.30
   7   3   5   90.49    5.20
   3  -7   5   86.79    5.00
   2  -7  -5  250.37   11.60
   2  -7  -5  260.27   13.50
   2  -7  -5  237.48   11.60
   7   2  -5  245.08   13.10
   7   2  -5  256.67   11.60
   7   2   5  250.17   13.10
   2  -7   5  252.57   13.50
   7   1  -5   14.30    1.00
   1  -7  -5   12.50    1.10
   1  -7  -5   13.20    1.20
   7   1  -5   14.60    1.40
   1  -7  -5   13.00    1.10
   1  -7   5   14.20    1.20
   7   1   5   11.30    1.00
   7   1   5   10.70    1.40
   7   0  -5    0.90    0.50
   0  -7  -5    1.00    0.60
   0  -7  -5    1.90    0.50
   7   0   5    0.40    0.40
   0  -7   5    0.30    0.50
  -1  -7  -5   11.80    1.10
   7  -1  -5   12.20    1.00
  -1  -7   5   13.00    1.10
   7  -1   5   12.40    0.90
  -2  -7  -5  252.67   11.60
   7  -2  -5  254.77   11.50
  -2  -7   5  255.47   13.40
   7  -2   5  237.28   11.50
   3   7  -5   89.09    5.10
   7  -3  -5   97.09    4.40
  -3  -7   5   85.79    5.00
   7  -3   5   83.99    5.10
   7  -4  -5  123.59    6.00
   4   7  -5  116.99    6.90
  -4  -7   5  131.49    7.00
   7  -4   5  126.49    7.10
   7  -5  -5   42.40    2.40
   5   7  -5   41.70    3.00
  -5  -7   5   42.10    2.70
   7  -5   5   44.80    2.90
   5   7   5   39.70    3.00
   6   7  -5   36.90    2.80
   7  -6  -5   31.60    1.90
   7  -6  -5   30.00    2.10
   7  -6  -5   33.80    2.50
   6   7   5   35.00    1.90
  -6  -7   5   34.70    2.40
   7  -6   5   33.10    1.90
   6   7   5   35.10    1.90
   7  -6   5   36.50    1.90
   6   7   5   35.00    2.70
   7  -6   5   34.30    1.90
   7  -6   5   34.60    1.90
   7  -6   5   37.50    2.60
   7  -6   5   37.20    1.90
   7   7  -5    0.00    0.50
   7   7  -5    1.20    0.90
   7  -7  -5    0.90    0.50
   7  -7  -5   -1.10    0.70
   7  -7  -5   -0.20    0.50
   7  -7   5   -0.60    0.70
   7  -7   5   -0.60    0.50
  -7  -7   5   -0.50    0.70
   7   7   5   -0.80    0.90
   7  -7   5    0.00    0.50
   7   7   5   -0.50    0.50
   7  -7   5    0.40    0.60
   7  -7   5   -0.40    0.50
   7   7   5    0.10    0.50
   7  -7   5    0.00    0.50
   8   7  -5   72.39    3.50
   7  -8  -5   73.79    3.40
   7  -8  -5   72.79    3.60
   7  -8  -5   69.19    4.50
   7  -8   5   71.19    3.50
   7  -8   5   73.09    3.40
   7  -8   5   72.89    4.50
   8   7   5   74.99    3.40
   7  -8   5   74.29    3.40
   7  -8   5   69.69    3.50
   8   7   5   75.59    3.40
   6  -8  -5    1.70    0.60
   6  -8  -5    2.40    0.90
   8   6  -5    1.20    0.60
   8   6  -5    1.80    1.00
   6  -8  -5    1.70    0.60
   6  -8   5    2.30    0.60
   6  -8   5    3.50    0.60
   8   6   5    3.00    0.60
   6  -8   5    3.80    0.90
   8   6   5    3.50    0.60
   8   6   5    2.30    1.20
   6  -8   5    3.20    0.60
   6  -8   5    1.50    0.60
   8   5  -5   27.90    2.40
   5  -8  -5   22.90    1.50
   5  -8  -5   22.60    1.90
   8   5  -5   27.00    1.50
   5  -8  -5   22.90    1.50
   5  -8   5   25.20    1.50
   5  -8   5   24.60    1.40
   8   5   5   26.70    1.50
   5  -8   5   24.50    1.50
   5  -8   5   23.90    1.50
   8   5   5   25.00    2.40
   5  -8   5   24.40    1.50
   5  -8   5   25.90    2.00
   8   5   5   23.50    1.50
   8   4  -5   20.50    1.30
   4  -8  -5   17.40    1.20
   4  -8  -5   18.00    1.60
   8   4  -5   20.30    2.00
   4  -8  -5   17.90    1.20
   4  -8   5   18.00    1.20
   8   4   5   20.90    1.30
   4  -8   5   17.80    1.30
   4  -8   5   17.80    1.20
   4  -8   5   20.10    1.70
   8   4   5   18.10    1.90
   4  -8   5   18.80    1.30
   3  -8  -5   55.29    2.80
   3  -8  -5   54.19    3.50
   8   3  -5   59.59    3.80
   3  -8   5   57.99    2.70
   3  -8   5   66.39    3.60
   8   3   5   58.39    3.80
   2  -8  -5   45.30    2.90
   8   2  -5   50.29    2.70
   8   2  -5   48.90    3.20
   8   2   5   51.09    3.40
   2  -8   5   48.30    3.00
   2  -8   5   47.40    2.30
   8   1  -5    7.20    1.20
   1  -8  -5    8.60    1.00
   8   1  -5    7.80    0.90
   8   1   5    8.90    1.00
   1  -8   5    8.40    1.00
   0  -8  -5    0.60    0.60
   8   0  -5    0.50    0.50
   0  -8   5    0.70    0.50
   8   0   5    2.20    0.60
   8  -1  -5    9.10    1.00
  -1  -8  -5    9.80    1.00
  -1  -8   5    9.00    1.10
   8  -1   5    9.30    0.90
  -2  -8  -5   48.20    2.60
   8  -2  -5   48.90    2.50
   8  -2   5   42.70    2.40
  -2  -8   5   45.90    2.80
  -2  -8   5   44.40    2.20
   8  -3  -5   59.89    3.10
  -3  -8  -5   60.29    3.20
  -3  -8   5   54.59    3.50
  -3  -8   5   61.39    2.80
   8  -4  -5   19.50    1.40
  -4  -8  -5   17.20    1.60
   8  -4  -5   18.70    1.20
  -4  -8   5   19.10    1.60
   8  -4   5   18.80    1.30
  -4  -8   5   20.90    1.20
   8  -4   5   17.10    1.30
   8  -5  -5   22.40    1.50
   8  -5  -5   25.40    1.70
   8  -5  -5   22.50    1.50
   5   8  -5   26.70    2.30
  -5  -8   5   25.30    1.90
   8  -5   5   24.60    1.50
   8  -5   5   25.30    1.50
  -5  -8   5   26.30    1.40
   8  -5   5   24.50    1.50
   8  -6  -5    2.90    0.70
   8  -6  -5    3.10    0.60
   8  -6  -5    2.10    0.60
   6   8  -5    2.90    1.10
   8  -6   5    2.60    0.70
   8  -6   5    2.00    0.60
   8  -6   5    1.80    0.90
   8  -6   5    2.40    0.60
  -6  -8   5    2.30    0.80
   6   8   5    2.40    0.60
   8  -6   5    2.50    0.50
   6   8   5    2.50    0.60
   8  -6   5    2.50    0.60
   8  -7  -5   74.09    3.50
   7   8  -5   74.69    3.40
   8  -7   5   67.89    3.50
   8  -7   5   71.19    3.50
   7   8   5   76.29    3.40
   8  -7   5   66.59    3.50
   8  -7   5   68.29    4.40
   8  -7   5   68.89    3.40
   8  -7   5   73.29    3.40
   7   8   5   73.59    3.40
   8   8  -5    0.20    0.50
   8  -8  -5    0.30    0.50
   8  -8  -5    0.60    0.50
   8  -8   5    0.20    0.50
   8   8   5    0.70    0.50
   8  -8   5    0.60    0.50
   8  -8   5    0.80    0.50
   8  -8   5    1.20    0.50
   8   8   5    0.60    0.50
   8  -9  -5    0.90    0.50
   8  -9  -5    1.20    0.40
   9   8  -5    1.20    0.50
   9   8   5    2.00    0.50
   9   8   5    1.40    0.50
   7  -9  -5    9.80    1.00
   9   7  -5   11.30    1.00
   7  -9  -5   11.40    1.00
   7  -9   5    9.90    1.00
   9   7   5    9.40    0.90
   9   7   5   11.30    1.00
   7  -9   5   10.60    1.00
   9   6  -5    8.10    1.00
   6  -9  -5    7.30    1.00
   6  -9  -5    7.10    0.80
   9   6   5    9.00    0.90
   6  -9   5   10.30    1.00
   6  -9   5    9.70    1.00
   6  -9   5    9.70    1.00
   9   6   5    9.10    1.00
   5  -9  -5    4.80    1.00
   5  -9  -5    4.90    0.70
   9   5  -5    5.90    0.80
   5  -9  -5    4.90    0.70
   5  -9   5    5.90    0.70
   5  -9   5    7.50    0.90
   5  -9   5    4.90    1.00
   9   5   5    7.30    0.90
   5  -9   5    5.30    0.80
   9   5   5    5.80    0.70
   4  -9  -5    2.00    0.80
   9   4  -5    1.40    1.00
   4  -9  -5    2.40    0.60
   4  -9  -5    1.70    0.60
   9   4  -5    1.90    0.60
   4  -9   5    0.90    0.50
   4  -9   5    1.20    0.50
   9   4   5    1.80    1.00
   4  -9   5    1.90    0.80
   4  -9   5    1.00    0.60
   4  -9   5    0.90    0.50
   9   4   5    1.50    0.50
   9   3  -5   50.19    3.60
   3  -9  -5   52.39    3.30
   3  -9  -5   54.89    2.50
   3  -9  -5   52.79    2.60
   9   3  -5   53.79    2.60
   3  -9  -5   52.49    2.50
   3  -9   5   50.69    2.50
   3  -9   5   50.19    2.50
   3  -9   5   47.70    2.60
   9   3   5   45.00    3.50
   9   3   5   48.70    2.50
   3  -9   5   54.69    3.30
   9   2  -5    8.90    0.90
   9   2  -5    7.50    1.40
   2  -9  -5    7.50    0.90
   2  -9  -5    7.70    1.10
   9   2  -5   10.10    0.90
   9   2  -5   10.00    1.10
   2  -9  -5    7.80    0.90
   9   2   5    8.70    0.90
   2  -9   5   10.40    1.30
   2  -9   5    7.70    0.90
   2  -9   5    7.20    0.90
   2  -9   5    8.20    0.80
   1  -9  -5   19.00    1.20
   9   1  -5   17.90    1.20
   9   1  -5   19.20    1.50
   9   1  -5   17.90    1.30
   1  -9  -5   19.20    1.20
   1  -9   5   19.30    1.60
   9   1   5   22.20    1.30
   1  -9   5   19.00    1.20
   0  -9  -5    4.90    0.60
   9   0  -5    5.60    0.60
   9   0  -5    4.80    0.60
   0  -9  -5    4.70    0.60
   9   0  -5    3.80    0.80
   9   0   5    2.80    0.80
   9   0   5    4.00    0.60
   0  -9   5    4.10    0.60
   9   0   5    4.90    0.70
   0  -9   5    5.70    1.00
   9  -1  -5   18.80    1.40
   9  -1  -5   18.20    1.10
  -1  -9  -5   20.50    1.20
   9  -1  -5   18.60    1.30
   9  -1   5   18.80    1.20
  -1  -9   5   18.00    1.50
   9  -1   5   16.50    1.20
  -1  -9   5   18.50    1.10
   9  -1   5   17.60    1.40
   9  -2  -5    8.00    0.90
  -2  -9  -5    8.10    0.80
   9  -2  -5    7.90    0.80
   9  -2  -5    9.10    1.10
  -2  -9   5    9.10    1.20
   9  -2   5    7.20    0.90
   9  -2   5    7.60    0.80
  -2  -9   5    8.20    0.80
   9  -3  -5   47.80    2.80
  -3  -9  -5   53.39    2.90
   9  -3  -5   47.10    2.60
   9  -3  -5   46.10    2.40
   9  -3   5   51.99    2.50
   9  -3   5   54.19    2.60
  -3  -9   5   55.29    3.20
  -3  -9   5   52.49    2.40
   9  -4  -5    2.00    0.70
   9  -4  -5    2.00    0.60
   9  -4  -5    1.20    0.50
  -4  -9  -5    3.40    1.00
  -4  -9   5    1.50    0.50
  -4  -9   5    2.20    0.80
   9  -4   5    1.60    0.60
   9  -4   5    1.80    0.50
   9  -4   5    2.10    0.60
  -5  -9  -5    6.00    1.10
   9  -5  -5    5.90    0.90
   9  -5  -5    5.40    0.70
   9  -5  -5    6.90    0.80
   9  -5   5    6.80    0.80
   9  -5   5    5.80    0.70
  -5  -9   5    6.50    0.80
  -5  -9   5    6.10    1.00
   9  -5   5    7.50    0.80
   9  -6  -5   10.00    0.90
   9  -6  -5    8.70    1.00
  -6  -9  -5   10.10    1.40
   9  -6   5    9.30    0.90
   9  -6   5    8.10    1.00
   9  -6   5    7.80    0.90
   6   9   5    5.80    0.80
   6   9   5    6.90    0.90
  -7  -9  -5    9.80    1.30
   9  -7  -5    9.50    0.90
   7   9  -5   10.70    1.00
   9  -7   5    9.00    0.90
   9  -7   5   10.80    1.10
   9  -7   5   10.10    0.90
   9  -7   5   10.10    0.90
   7   9   5   10.20    0.90
   7   9   5   10.30    1.00
   8   9  -5    1.20    0.50
   9  -8  -5    1.70    0.50
   8   9   5    1.40    0.50
   9  -8   5    1.50    0.50
   9  -8   5    1.30    0.40
   8   9   5    2.20    0.50
   9  -8   5    1.30    0.50
   9  -9  -5    0.60    0.40
   9   9  -5   -0.20    0.40
   9   9   5    0.10    0.40
   9   9   5   -0.40    0.30
   9 -10  -5    1.90    0.40
  10   8  -5    3.20    0.50
   8 -10  -5    3.40    0.50
   8 -10  -5    3.00    0.50
  10   8   5    3.80    0.50
   7 -10  -5    3.00    0.50
  10   7  -5    3.10    0.60
   7 -10  -5    3.40    0.60
  10   7   5    3.90    0.50
   7 -10   5    3.80    0.60
   6 -10  -5    8.40    0.90
  10   6  -5    9.20    0.90
   6 -10  -5    8.90    1.00
   6 -10   5    8.10    0.90
  10   6   5    9.10    0.80
   5 -10  -5    7.60    0.90
   5 -10  -5    8.20    0.90
  10   5  -5    7.80    0.90
   5 -10   5    6.60    0.70
  10   5   5    7.60    0.80
   4 -10  -5    4.70    0.60
   4 -10  -5    2.80    0.60
  10   4  -5    3.90    0.60
   4 -10   5    3.90    0.60
   4 -10   5    4.70    0.70
  10   4   5    4.60    0.60
  10   3  -5   15.60    1.20
   3 -10  -5   17.70    1.20
   3 -10  -5   14.60    1.20
   3 -10   5   17.20    1.20
   3 -10   5   16.90    1.20
   3 -10   5   19.40    1.70
  10   3   5   17.00    1.20
  10   2  -5    6.00    0.70
   2 -10  -5    4.60    0.70
  10   2  -5    6.00    0.70
   2 -10  -5    5.30    0.70
   2 -10   5    5.10    1.00
  10   2   5    6.30    0.70
   2 -10   5    4.30    0.60
   2 -10   5    4.10    0.60
   1 -10  -5   22.50    1.40
  10   1  -5   24.40    1.40
  10   1  -5   23.70    1.70
   1 -10  -5   21.10    1.40
  10   1  -5   22.20    1.40
   1 -10   5   24.40    1.40
   1 -10   5   24.00    1.90
  10   1   5   24.40    1.40
  10   0  -5    0.70    0.50
   0 -10  -5    0.30    0.50
   0 -10  -5    0.60    0.50
  10   0  -5    0.40    0.70
  10   0  -5    0.10    0.40
   0 -10   5    0.40    0.70
  10   0   5    0.40    0.50
   0 -10   5    0.20    0.40
  10   0   5    0.60    0.50
  10  -1  -5   22.80    1.40
  -1 -10  -5   25.00    1.40
  10  -1  -5   22.90    1.70
  10  -1  -5   23.50    1.40
  10  -1   5   24.60    1.40
  -1 -10   5   22.30    1.40
  10  -1   5   24.00    1.40
  -1 -10   5   22.60    1.80
  10  -2  -5    4.80    0.60
  10  -2  -5    6.50    0.70
  10  -2  -5    4.80    0.90
  -2 -10  -5    5.20    0.60
  -2 -10   5    6.30    1.00
  10  -2   5    4.90    0.70
  -2 -10   5    6.40    0.80
  10  -2   5    4.80    0.60
  10  -3  -5   18.00    1.20
  10  -3  -5   16.00    1.10
  10  -3  -5   17.00    1.30
  -3 -10   5   16.90    1.10
  -3 -10   5   14.60    1.40
  10  -3   5   14.50    1.20
  10  -3   5   13.70    1.10
  10  -4  -5    5.50    0.60
  10  -4  -5    4.10    0.80
  10  -4  -5    3.60    0.60
  10  -4   5    4.80    0.60
  -4 -10   5    4.00    0.60
  10  -4   5    4.20    0.70
  10  -5  -5    8.40    0.90
  10  -5  -5    6.20    0.90
   5  10   5    7.60    0.90
  -5 -10   5    7.50    0.80
  10  -5   5    5.40    0.80
  10  -5   5    7.50    0.80
  10  -5   5    7.10    0.80
  10  -6  -5    7.90    0.90
  10  -6  -5    9.00    0.90
   6  10  -5    8.40    0.90
   6  10   5    8.80    0.90
   6  10   5    9.00    0.90
  10  -6   5    7.00    0.80
  10  -6   5    8.70    0.90
  10  -6   5    6.80    0.80
   7  10  -5    3.10    0.60
   7  10  -5    4.00    0.50
  10  -7  -5    4.10    0.50
  10  -7   5    3.10    0.60
   7  10   5    3.20    0.50
   7  10   5    3.80    0.50
  10  -7   5    3.60    0.50
  10  -7   5    3.50    0.50
   8  10  -5    5.10    0.60
  10  -8  -5    5.10    0.70
   8  10   5    4.00    0.50
   8  10   5    4.90    0.60
  10  -8   5    4.10    0.50
   7 -11  -5    0.50    0.40
   7 -11  -5    1.20    0.40
  11   7  -5    0.70    0.30
  11   7   5    0.60    0.30
  11   6  -5    0.20    0.40
   6 -11  -5    0.90    0.50
   6 -11  -5    0.70    0.40
  11   6   5    0.80    0.40
   6 -11   5    0.10    0.40
   5 -11  -5    2.10    0.50
   5 -11  -5    2.00    0.60
  11   5  -5    1.40    0.50
  11   5   5    2.40    0.50
   5 -11   5    2.00    0.50
  11   4  -5    1.70    0.50
   4 -11  -5    2.30    0.50
   4 -11  -5    2.40    0.60
  11   4   5    1.00    0.50
   4 -11   5    1.60    0.50
  11   3  -5    1.20    0.50
   3 -11  -5    1.30    0.50
   3 -11   5    0.80    0.50
   3 -11   5    1.10    0.50
  11   3   5    0.60    0.40
   2 -11  -5    2.40    0.60
   2 -11  -5    2.70    0.60
  11   2  -5    3.60    0.60
  11   2  -5    3.90    0.60
   2 -11   5    3.10    0.60
  11   2   5    3.40    0.60
   2 -11   5    3.10    0.60
   1 -11  -5    1.50    0.50
  11   1  -5    2.30    0.60
   1 -11  -5    1.90    0.50
  11   1  -5    2.10    0.50
   1 -11   5    1.50    0.50
  11   1   5    1.40    0.50
   0 -11  -5    1.00    0.50
  11   0  -5    2.00    0.80
  11   0  -5    1.50    0.50
  11   0  -5    1.60    0.60
  11   0   5    2.00    0.50
  11   0   5    2.40    0.50
   0 -11   5    1.90    0.50
  -1 -11  -5    1.20    0.50
  11  -1  -5    1.90    0.50
  11  -1  -5    2.10    0.80
  11  -1  -5    1.60    0.50
  11  -1   5    1.70    0.50
  11  -1   5    1.70    0.50
  -1 -11   5    1.40    0.50
  11  -2  -5    2.00    0.70
  11  -2  -5    3.60    0.50
  11  -2  -5    3.20    0.60
  -2 -11  -5    2.60    0.50
  11  -2   5    3.40    0.60
  -2 -11   5    2.60    0.50
  11  -2   5    4.10    0.60
  11  -3  -5    0.80    0.60
  11  -3  -5    1.30    0.50
  11  -3  -5    1.10    0.40
  11  -3   5    1.50    0.50
  -3 -11   5    0.70    0.40
  11  -3   5    1.50    0.50
  11  -4  -5    2.40    0.60
  11  -4   5    2.30    0.50
  -4 -11   5    2.30    0.40
  11  -4   5    1.80    0.50
  11  -5  -5    1.80    0.50
   5  11   5    1.50    0.50
  11  -5   5    1.90    0.50
  11  -5   5    2.50    0.50
   5  11   5    2.60    0.50
  11  -6  -5    0.10    0.40
   6  11  -5    0.90    0.40
   6  11  -5    0.40    0.40
  11  -6   5    0.00    0.40
   6  11   5    1.20    0.40
  11  -6   5    0.70    0.40
  11  -6   5    0.60    0.50
   6  11   5    1.50    0.40
   7  11  -5    0.60    0.40
   7  11   5   -0.20    0.30
  11  -7   5    0.70    0.30
  12   5  -5    4.90    0.60
   5 -12  -5    5.50    0.60
   5 -12   5    5.90    0.60
  12   5   5    6.10    0.60
  12   4  -5    3.40    0.50
   4 -12  -5    3.40    0.50
  12   4   5    6.20    0.60
   4 -12   5    4.30    0.50
  12   3  -5    2.10    0.40
   3 -12  -5    2.90    0.50
  12   3   5    3.50    0.50
   3 -12   5    3.00    0.60
   3 -12   5    2.90    0.50
  12   2  -5    4.20    0.50
   2 -12  -5    3.80    0.60
  12   2  -5    4.10    0.50
  12   2   5    3.30    0.50
   2 -12   5    3.70    0.60
  12   1  -5    1.90    0.40
   1 -12  -5    1.40    0.50
  12   1  -5    1.60    0.50
   1 -12   5    2.70    0.50
  12   1   5    2.40    0.50
  12   0  -5    5.30    0.60
  12   0  -5    5.20    0.70
   0 -12  -5    5.00    0.60
  12   0   5    6.50    0.70
   0 -12   5    6.10    0.80
  12   0   5    5.70    0.70
  12  -1  -5    2.60    0.50
  12  -1  -5    1.60    0.50
  -1 -12  -5    1.40    0.50
  12  -1   5    2.60    0.50
  -1 -12   5    2.50    0.50
  12  -1   5    2.30    0.50
  12  -2  -5    3.60    0.60
  12  -2  -5    3.60    0.50
  -2 -12  -5    4.20    0.50
  12  -2   5    4.60    0.60
  12  -2   5    4.20    0.50
  -2 -12   5    4.50    0.60
  12  -3  -5    2.60    0.50
  12  -3   5    1.80    0.50
  12  -3   5    2.80    0.40
  -3 -12   5    3.00    0.50
  12  -4  -5    3.90    0.60
   4  12   5    5.10    0.60
  12  -4   5    4.60    0.60
  12  -4   5    3.80    0.60
  -4 -12   5    4.80    0.60
   5  12  -5    5.30    0.60
  12  -5  -5    3.90    0.50
   5  12  -5    4.90    0.60
  12  -5   5    3.80    0.50
  12  -5   5    4.90    0.60
   5  12   5    6.50    0.60
  12  -6   5   -0.10    0.40
   6  12   5    0.00    0.30
  13   3   5    1.90    0.30
  13   2  -5    1.10    0.30
  13   2   5    1.00    0.30
  13   1  -5    1.00    0.40
  13   1  -5    0.80    0.30
   1 -13   5    1.60    0.40
  13   1   5    1.50    0.30
  13   0  -5    1.30    0.30
  13   0  -5    1.70    0.40
   0 -13   5    1.00    0.40
  13   0   5    1.00    0.30
  13  -1  -5    0.80    0.30
  13  -1  -5    1.10    0.40
  13  -1   5    0.50    0.30
  13  -1   5    1.00    0.40
  -1 -13   5    1.00    0.40
  13  -2  -5    0.50    0.40
   2  13   5    1.60    0.40
  13  -2   5    1.30    0.30
  13  -2   5    1.20    0.40
  13  -3  -5    1.60    0.40
  13  -3   5    1.70    0.40
  13  -3   5    1.50    0.30
   3  13   5    1.50    0.30
   0   0   6    2.90    0.40
   0   1   6 1187.78   65.99
  -1   1   6  301.97   17.20
   1   1   6  315.57   17.30
   2   1   6 1130.19   62.89
   2   0   6 4184.98  232.28
   2  -1  -6 1083.19   47.80
   2  -2  -6 7549.14  337.87
   2   2   6 7785.92  426.26
   3   2  -6  577.44   25.70
   2  -3  -6  516.55   22.80
   3   2   6  454.25   28.70
   3   2   6  503.55   25.60
   3   1  -6  782.92   37.70
   3   1  -6  781.92   33.50
   1  -3  -6  748.23   33.60
   3   1   6  751.22   37.80
   3   1   6  726.73   42.30
   3   0  -6 2171.38   93.29
   0  -3  -6 2050.39   93.29
   3   0   6 2174.98  104.89
   3   0   6 2070.59  117.59
  -1  -3  -6  733.33   33.90
   1   3  -6  770.62   38.10
   3  -1  -6  795.02   33.90
   3  -2  -6  491.45   22.80
   2   3  -6  495.45   25.60
   2   3   6  547.55   25.60
   3  -3  -6  292.77   14.00
   3  -3  -6  290.47   16.50
   3   3  -6  352.46   15.80
   3   3   6  304.47   17.70
   3   3   6  321.37   15.80
   3  -4  -6  442.16   18.70
   3  -4  -6  450.25   22.10
   4   3  -6  437.76   21.10
   4   3   6  392.66   23.60
   4   3   6  398.86   21.00
   3  -4   6  379.86   22.00
   4   2  -6   48.80    2.70
   2  -4  -6   46.20    2.40
   2  -4  -6   46.70    2.60
   2  -4   6   44.50    2.60
   4   2   6   45.50    2.70
   4   2   6   47.50    3.10
  -1   4  -6  369.26   19.30
   1  -4  -6  377.56   17.20
   4   1  -6  380.26   19.30
   4   1   6  417.46   19.40
   4   1   6  369.56   21.70
   1  -4   6  393.56   20.30
   0  -4  -6  219.28   10.20
   4   0  -6  234.78   10.10
   4   0  -6  218.78   11.40
   0   4  -6  231.78   11.40
   0  -4   6  223.68   12.00
   4   0   6  216.08   12.80
   4   0   6  231.38   11.50
   4  -1  -6  414.46   18.10
   1   4  -6  416.66   20.40
  -1  -4  -6  387.56   18.10
   2   4  -6   43.20    2.70
   4  -2  -6   45.60    2.40
   4  -2  -6   47.50    2.70
   4  -2   6   43.10    2.60
   2   4   6   50.99    2.70
   4  -3  -6  393.86   21.60
   3   4  -6  394.06   20.60
   4  -3  -6  395.76   18.30
   3   4   6  434.86   20.50
   4  -3   6  417.96   21.60
   4  -4  -6  385.66   16.90
   4  -4  -6  361.66   19.90
   4   4  -6  376.16   19.00
   4   4   6  389.16   19.00
   4   4   6  380.56   21.30
   4  -4   6  355.46   19.90
   4  -5  -6  121.79    5.70
   5   4  -6  117.39    6.40
   4  -5  -6  123.09    5.50
   4  -5  -6  120.99    6.40
   5   4   6  107.69    6.30
   4  -5   6  109.89    6.40
   5   4   6  110.49    7.10
   5   3  -6  349.47   16.70
   5   3  -6  349.17   18.70
   3  -5  -6  361.36   16.70
   3  -5  -6  369.86   16.60
   3  -5  -6  351.06   19.50
   5   3   6  394.26   21.00
   5   3   6  384.46   18.70
   3  -5   6  382.06   19.50
   2  -5  -6   32.40    2.20
   5   2  -6   28.50    2.20
   2  -5  -6   34.00    2.00
   2  -5   6   40.70    2.20
   5   2   6   42.70    2.40
   5   2   6   43.20    2.70
   1  -5  -6  186.58    8.60
   5   1  -6  175.98    9.60
   1  -5  -6  177.38   10.00
   5   1   6  191.78    9.70
   5   1   6  190.88   10.80
   1  -5   6  196.38   10.00
   5   0  -6  452.55   23.10
   0  -5  -6  436.16   24.30
   0   5  -6  455.55   23.10
   0  -5  -6  465.65   20.60
   0  -5   6  462.55   24.30
   5   0   6  473.25   25.90
   5   0   6  480.35   23.20
   5  -1  -6  195.98    8.70
   1   5  -6  202.88    9.90
  -1  -5   6  187.88   10.30
   5  -1   6  182.68   10.30
   2   5  -6   38.40    2.30
   5  -2  -6   39.70    2.00
   5  -2   6   31.40    2.20
   3   5  -6  387.16   19.40
   5  -3  -6  393.56   17.20
   5  -3  -6  386.06   20.30
   5  -3  -6  391.96   17.30
   5  -3   6  356.76   20.30
   3   5   6  376.06   19.30
   4   5  -6  110.99    6.30
   5  -4  -6  110.19    5.50
   5  -4  -6  112.49    6.40
   5  -4  -6  110.59    5.60
   5  -4   6  122.59    6.40
   4   5   6  124.89    7.20
   4   5   6  115.29    6.30
   5   5  -6  199.78   11.30
   5  -5  -6  217.28   10.00
   5  -5  -6  220.28   11.60
   5  -5  -6  224.48   10.10
   5   5   6  219.38   12.70
   5  -5   6  203.68   11.60
   5   5   6  219.18   11.30
   5  -6  -6  160.58    8.80
   6   5  -6  169.98    8.80
   5  -6  -6  161.38    7.60
   6   5   6  158.58    8.70
   5  -6   6  159.08    8.90
   6   5   6  154.18    9.80
   4  -6  -6  101.19    4.90
   4  -6  -6   96.99    4.70
   4  -6  -6  103.59    5.50
   6   4  -6  103.69    5.60
   6   4   6   90.49    6.20
   6   4   6   90.59    5.50
   4  -6   6   95.09    5.50
   6   3  -6   89.39    4.30
   3  -6  -6   89.29    4.50
   3  -6  -6   91.29    4.30
   6   3  -6   86.39    5.10
   3  -6  -6   98.29    5.00
   6   3   6   86.89    5.60
   6   3   6   85.29    5.10
   3  -6   6   85.69    5.00
   6   2  -6  325.67   15.20
   2  -6  -6  347.47   17.80
   6   2  -6  327.77   17.10
   2  -6  -6  342.57   15.20
   2  -6  -6  331.47   15.30
   6   2   6  349.27   19.20
   6   2   6  321.97   17.10
   2  -6   6  332.77   17.80
   1  -6  -6   56.39    3.00
   1  -6  -6   60.39    3.30
   6   1  -6   57.49    2.90
   6   1  -6   54.49    3.40
   1  -6  -6   54.99    3.00
   1  -6   6   58.09    3.40
   6   1   6   57.89    3.80
   6   1   6   63.69    2.90
   6   1   6   62.29    3.50
   0  -6  -6    8.10    0.80
   0  -6  -6    6.10    0.80
   6   0  -6    6.10    0.90
   0  -6  -6    6.70    0.90
   6   0  -6    8.00    0.80
   0  -6   6    9.80    0.90
   6   0   6    7.70    0.70
   6  -1  -6   60.49    2.90
  -1  -6  -6   63.39    3.00
  -1  -6   6   60.89    3.30
   6  -1   6   46.90    2.80
   2   6  -6  351.46   17.30
   6  -2  -6  355.66   15.50
   6  -2  -6  340.27   15.40
  -2  -6   6  317.77   18.10
   6  -2   6  335.37   18.10
   3   6  -6   90.59    5.20
   6  -3  -6   93.39    4.50
   6  -3  -6   97.99    4.60
  -3  -6   6   92.19    5.20
   6  -3   6   88.99    5.20
   6  -4  -6   90.99    4.80
   6  -4  -6   86.79    4.60
   4   6  -6   95.99    5.40
   6  -4  -6   89.99    5.40
   6  -4   6  105.59    5.40
   4   6   6  103.09    6.20
   4   6   6   94.99    5.40
   6  -5  -6  150.48    8.80
   6  -5  -6  160.58    7.50
   5   6  -6  160.48    8.60
   5   6   6  159.38    9.80
   6  -5   6  162.58    8.80
   5   6   6  158.48    8.60
   6  -6  -6    8.80    1.20
   6   6  -6    6.40    1.30
   6  -6  -6    8.00    1.00
   6   6   6    5.90    1.20
   6  -6   6    7.50    1.10
   6  -7  -6    7.50    1.00
   7   6  -6    6.30    1.40
   6  -7  -6    8.90    0.90
   6  -7  -6    8.80    0.90
   7   6  -6    7.40    1.00
   6  -7  -6    9.70    1.30
   7   6   6    7.80    0.90
   7   6   6    6.60    1.40
   6  -7   6    8.10    0.90
   6  -7   6    9.40    1.00
   6  -7   6    8.50    0.90
   7   6   6    8.00    0.80
   6  -7   6    7.30    0.90
   6  -7   6    8.30    1.20
   7   5  -6   66.59    4.30
   5  -7  -6   63.29    4.00
   5  -7  -6   61.39    3.40
   7   5   6   66.59    4.20
   5  -7   6   69.09    3.20
   5  -7   6   71.49    4.10
   4  -7  -6    6.60    0.90
   4  -7  -6    6.50    1.00
   7   4  -6    6.60    1.30
   7   4   6    6.30    1.20
   4  -7   6    6.00    1.00
   3  -7  -6    6.40    0.90
   7   3  -6    7.90    0.90
   3  -7  -6    6.90    0.90
   7   3  -6    6.10    1.20
   7   3   6    4.80    1.20
   7   2  -6    7.90    1.30
   7   2  -6   12.40    1.00
   2  -7  -6    8.40    1.00
   2  -7  -6    9.60    1.10
   2  -7  -6    8.70    0.90
   7   2   6    9.20    1.40
   2  -7   6   10.90    1.10
   7   1  -6    4.40    0.70
   7   1  -6    4.80    0.90
   1  -7  -6    4.80    0.70
   1  -7  -6    4.40    0.70
   1  -7  -6    2.30    0.70
   7   1   6    5.60    0.70
   1  -7   6    5.50    0.80
   7   1   6    5.20    1.00
   0  -7  -6   94.79    5.30
   7   0  -6  118.19    5.30
   7   0   6  117.19    5.30
   0  -7   6  111.69    6.10
  -1  -7  -6    7.30    0.90
   7  -1  -6    4.30    0.70
  -1  -7   6    4.50    0.70
   7  -1   6    3.80    0.60
  -2  -7  -6   10.60    1.10
   7  -2  -6    9.70    1.00
  -2  -7   6   11.70    1.10
   3   7  -6    7.90    1.20
   7  -3  -6    6.80    0.90
   7  -3   6    6.80    1.10
  -3  -7   6    7.50    1.00
   7  -4  -6    6.80    0.90
   4   7  -6    5.20    1.10
   7  -4   6    5.70    1.00
  -4  -7   6    7.20    1.00
   7  -5  -6   62.49    3.30
   5   7  -6   68.99    4.10
  -5  -7   6   61.89    2.90
   7  -5   6   64.19    3.90
  -5  -7   6   57.29    3.80
   7  -6  -6    7.50    1.00
   6   7  -6    6.30    1.30
   7  -6  -6    7.30    0.90
   7  -6  -6    8.00    1.30
   7  -6  -6    8.10    1.00
  -6  -7   6    8.60    1.20
   6   7   6    8.10    0.90
   6   7   6    7.70    0.90
   7  -6   6    9.10    1.30
   7  -6   6    8.30    0.80
   7  -6   6    9.70    1.10
   7  -6   6    7.70    0.90
   7  -6   6    9.10    1.00
   7  -6   6    9.60    1.00
   6   7   6    9.90    1.60
   7  -7  -6   14.50    1.60
   7   7  -6   14.80    1.20
   7   7  -6   12.50    1.80
   7  -7  -6   13.50    1.20
   7  -7  -6   14.20    1.10
   7   7   6   14.80    1.20
   7  -7   6   14.50    1.60
   7  -7   6   13.60    1.10
   7  -7   6   12.40    1.10
   7   7   6   14.70    1.10
   7   7   6   16.00    1.90
   7  -7   6   14.50    1.10
  -7  -7   6   16.80    1.60
   7  -7   6   14.70    1.20
   7  -7   6   13.90    1.20
   7  -8  -6    0.50    0.50
   8   7  -6    0.60    0.60
   7  -8  -6    0.00    0.50
   7  -8   6    1.20    0.50
   7  -8   6    2.20    0.90
   7  -8   6    0.50    0.50
   7  -8   6    1.10    0.60
   8   7   6    0.90    0.50
   7  -8   6    1.40    0.50
   8   7   6    0.80    0.50
   8   6  -6   30.40    1.70
   6  -8  -6   31.30    2.30
   6  -8  -6   31.30    1.70
   6  -8  -6   30.40    1.70
   6  -8   6   28.60    1.70
   8   6   6   27.70    1.70
   6  -8   6   29.50    1.70
   6  -8   6   28.20    1.70
   6  -8   6   27.20    1.70
   8   6   6   30.90    1.70
   6  -8   6   24.40    2.20
   5  -8  -6    1.90    0.90
   5  -8  -6    1.20    0.60
   8   5  -6    2.60    1.10
   8   5  -6    3.30    0.60
   5  -8  -6    2.10    0.60
   8   5   6    2.10    0.60
   5  -8   6    3.40    0.60
   5  -8   6    2.10    0.60
   5  -8   6    2.80    0.60
   5  -8   6    2.80    0.60
   5  -8   6    3.10    0.60
   8   5   6    2.30    1.10
   8   5   6    2.40    0.60
   5  -8   6    3.10    0.90
   8   4  -6   33.40    2.70
   4  -8  -6   33.70    1.90
   4  -8  -6   33.30    1.80
   8   4  -6   31.30    1.80
   4  -8  -6   33.20    2.30
   4  -8  -6   33.60    1.80
   4  -8   6   34.30    1.80
   4  -8   6   33.20    1.90
   8   4   6   34.70    2.70
   4  -8   6   32.10    1.70
   8   4   6   34.70    1.80
   4  -8   6   34.80    2.40
   4  -8   6   33.00    1.80
   3  -8  -6   94.99    5.60
   8   3  -6  105.69    5.90
   8   3  -6  102.49    4.90
   3  -8  -6   97.59    4.50
   3  -8   6   98.39    5.70
   8   3   6   98.69    5.90
   3  -8   6   96.09    4.40
   8   2  -6    9.00    1.30
   2  -8  -6    7.40    0.90
   8   2  -6    8.90    1.00
   2  -8  -6    5.90    0.80
   2  -8  -6    5.30    0.90
   2  -8   6    6.40    1.00
   2  -8   6    6.50    0.70
   8   2   6    6.80    1.20
   1  -8  -6   17.20    1.20
   8   1  -6   16.90    1.20
   1  -8   6   11.90    1.30
   0  -8  -6    6.70    0.90
   8   0  -6    5.40    0.80
   8   0   6    7.10    0.90
   0  -8   6    6.30    1.00
  -1  -8  -6   12.30    1.30
   8  -1  -6   13.90    1.20
  -1  -8   6   17.70    1.40
   8  -1   6   14.70    1.10
  -2  -8  -6    7.90    1.10
   8  -2  -6    6.30    0.90
  -2  -8   6    7.70    1.00
  -2  -8   6    7.50    0.70
   8  -3  -6   91.49    4.80
  -3  -8  -6  100.79    4.90
  -3  -8   6   97.89    4.30
  -3  -8   6   96.19    5.50
  -4  -8  -6   33.00    2.30
   8  -4  -6   33.70    2.10
   8  -4   6   35.10    1.80
  -4  -8   6   36.00    2.40
   8  -4   6   34.00    1.90
  -4  -8   6   34.80    1.80
   5   8  -6    3.60    1.10
   8  -5  -6    1.50    0.60
   8  -5  -6    2.10    0.60
   8  -5  -6    1.30    0.70
   8  -5   6    2.60    0.60
   8  -5   6    1.70    0.60
  -5  -8   6    2.10    0.50
   8  -5   6    1.80    0.50
  -5  -8   6    1.80    0.80
   8  -6  -6   27.30    1.70
   8  -6  -6   27.40    1.90
   8  -6   6   29.10    1.70
   8  -6   6   29.70    1.80
  -6  -8   6   33.20    2.20
   8  -6   6   32.00    1.70
   8  -6   6   27.60    2.30
   6   8   6   31.80    1.70
   8  -6   6   29.90    1.70
   8  -6   6   28.60    1.70
   6   8   6   29.80    1.60
   7   8  -6    1.40    0.60
   8  -7  -6    1.50    0.50
   8  -7   6    1.30    0.50
   7   8   6    0.60    0.50
   8  -7   6    0.40    0.50
   7   8   6    1.70    0.60
   8  -7   6    1.20    0.60
   8  -7   6    1.00    0.50
   8  -7   6    0.80    0.80
   8  -7   6    1.20    0.60
   8   8  -6    1.40    0.60
   8  -8  -6    3.20    0.60
   8  -8  -6    2.10    0.50
   8   8   6    2.50    0.50
   8  -8   6    1.90    0.60
   8  -8   6    1.50    0.50
   8  -8   6    1.60    0.50
   8   8   6    2.50    0.50
   8  -9  -6    3.20    0.60
   9   8  -6    3.70    0.60
   8  -9  -6    2.90    0.50
   9   8   6    3.30    0.50
   9   8   6    2.60    0.50
   7  -9  -6    5.40    0.70
   7  -9  -6    6.50    0.80
   9   7  -6    4.90    0.70
   9   7   6    5.10    0.60
   7  -9   6    5.70    0.70
   9   7   6    4.90    0.60
   7  -9   6    6.70    0.80
   7  -9   6    6.90    0.90
   6  -9  -6    7.90    0.90
   9   6  -6    5.10    0.70
   6  -9  -6    7.60    1.00
   6  -9   6    7.00    0.90
   6  -9   6    8.70    1.00
   9   6   6    6.90    0.90
   6  -9   6    9.20    1.00
   9   6   6    5.80    0.70
   5  -9  -6   57.09    2.80
   5  -9  -6   55.89    3.50
   9   5  -6   53.99    2.70
   5  -9  -6   56.79    2.70
   9   5   6   50.59    2.70
   5  -9   6   53.99    2.70
   5  -9   6   55.39    2.80
   5  -9   6   57.19    2.80
   9   5   6   52.99    2.70
   5  -9   6   56.59    3.60
   4  -9  -6    7.20    0.80
   9   4  -6    8.00    1.00
   9   4  -6    6.70    1.30
   4  -9  -6    7.30    1.10
   4  -9  -6    7.30    1.00
   4  -9   6    6.80    0.90
   4  -9   6    7.50    0.90
   9   4   6    8.00    0.90
   9   4   6    7.70    0.90
   4  -9   6    8.00    1.30
   4  -9   6    7.30    0.80
   4  -9   6    6.90    0.80
   3  -9  -6   12.50    1.00
   9   3  -6   11.60    1.70
   3  -9  -6   10.50    1.10
   3  -9  -6   11.90    1.00
   9   3  -6   13.40    1.10
   3  -9  -6   10.90    1.30
   3  -9   6   11.70    1.00
   3  -9   6   12.00    1.00
   3  -9   6    9.90    1.00
   9   3   6   12.20    1.00
   3  -9   6   15.30    1.50
   2  -9  -6    2.40    0.60
   9   2  -6    3.50    0.60
   9   2  -6    2.20    0.60
   9   2  -6    2.10    0.90
   9   2  -6    2.90    0.80
   2  -9  -6    3.90    0.60
   2  -9   6    2.50    0.60
   2  -9   6    4.20    0.90
   9   2   6    2.10    0.50
   2  -9   6    2.10    0.60
   2  -9   6    2.50    0.50
   9   1  -6   11.60    1.00
   1  -9  -6   10.30    0.90
   1  -9  -6   10.30    0.90
   9   1  -6   11.50    1.20
   9   1  -6   14.20    1.00
   1  -9   6   11.40    1.30
   1  -9   6   11.40    0.90
   9   1   6   11.90    0.90
   9   0  -6   11.10    0.90
   0  -9  -6    9.40    0.90
   9   0  -6   12.10    1.00
   0  -9  -6   12.30    1.00
   9   0  -6   10.90    1.10
   0  -9   6   14.00    1.30
   9   0   6   10.10    0.90
   9   0   6   10.30    1.00
   0  -9   6   11.20    0.90
   9  -1  -6   12.90    0.90
  -1  -9  -6   13.40    0.90
   9  -1  -6   12.50    1.00
  -1  -9  -6   12.30    1.30
   9  -1  -6   12.40    1.20
  -1  -9   6   11.60    1.30
   9  -1   6   11.50    1.00
   9  -1   6   11.10    1.20
   9  -1   6   11.90    1.00
  -1  -9   6   11.30    1.00
   9  -2  -6    2.40    0.70
   9  -2  -6    3.40    0.60
   9  -2  -6    2.70    0.50
  -2  -9  -6    2.10    0.50
  -2  -9  -6    3.70    0.90
  -2  -9   6    3.50    0.80
   9  -2   6    3.80    0.60
   9  -2   6    2.30    0.60
  -2  -9   6    2.90    0.50
  -3  -9  -6   11.00    1.30
   9  -3  -6   11.30    1.20
   9  -3  -6   10.80    1.00
   9  -3  -6   11.80    1.00
  -3  -9   6   12.40    0.90
   9  -3   6   10.70    1.00
   9  -3   6    9.50    1.00
  -3  -9   6   11.10    1.30
   9  -3   6   12.90    1.00
   9  -4  -6    8.00    1.10
   9  -4  -6    6.40    0.80
  -4  -9  -6    7.40    1.20
   9  -4   6    9.00    0.90
   9  -4   6    7.40    0.80
  -4  -9   6    6.40    0.80
   9  -4   6    6.90    0.80
  -4  -9   6    8.80    1.20
   9  -5  -6   51.79    2.70
  -5  -9  -6   50.59    3.10
   9  -5  -6   54.79    3.00
   9  -5  -6   51.69    2.80
   9  -5   6   57.09    2.80
   9  -5   6   59.29    2.80
  -5  -9   6   55.99    2.60
   9  -5   6   57.29    2.70
  -5  -9   6   57.49    3.50
  -6  -9  -6    4.60    1.00
   9  -6  -6    5.80    0.70
   9  -6   6    4.90    0.60
   9  -6   6    6.00    0.70
   6   9   6    4.60    0.70
   6   9   6    5.30    0.70
   9  -6   6    6.30    0.80
  -7  -9  -6    5.50    1.00
   9  -7  -6    3.50    0.60
   7   9  -6    4.00    0.60
   9  -7   6    5.60    0.70
   9  -7   6    6.80    0.80
   9  -7   6    3.70    0.60
   7   9   6    4.70    0.60
   9  -7   6    4.90    0.70
   7   9   6    5.00    0.60
   9  -8  -6    3.40    0.50
   8   9  -6    4.00    0.60
   8   9   6    3.10    0.50
   9  -8   6    3.20    0.50
   9  -8   6    2.90    0.50
   8   9   6    2.90    0.50
   9  -9  -6    2.10    0.50
   9   9  -6    2.10    0.50
   9   9   6    1.80    0.40
   9   9   6    1.80    0.40
  10   8  -6    2.60    0.40
   8 -10  -6    2.60    0.50
   8 -10  -6    2.70    0.50
  10   8   6    2.40    0.40
  10   8   6    2.50    0.40
  10   7  -6    0.60    0.50
   7 -10  -6    0.50    0.40
   7 -10  -6    0.00    0.50
  10   7   6    0.30    0.40
  10   7   6    0.90    0.40
   6 -10  -6    0.80    0.50
   6 -10  -6    0.60    0.50
  10   6  -6    0.00    0.50
  10   6   6    0.10    0.40
  10   6   6    0.30    0.40
   6 -10   6   -0.10    0.40
   5 -10  -6    8.30    1.00
  10   5  -6    8.40    0.90
   5 -10  -6    8.40    0.90
   5 -10   6    6.80    0.90
  10   5   6    7.30    0.90
  10   4  -6    8.80    0.90
   4 -10  -6    8.20    0.90
   4 -10  -6    8.40    1.00
  10   4   6   10.30    0.90
   4 -10   6    9.60    1.00
   4 -10   6   10.50    1.00
   3 -10  -6   36.10    1.90
   3 -10  -6   35.10    2.00
  10   3  -6   35.80    1.90
   3 -10   6   35.50    1.90
  10   3   6   36.10    1.90
   3 -10   6   34.90    1.90
   3 -10   6   38.50    2.60
   2 -10  -6   21.30    1.30
  10   2  -6   21.30    1.30
  10   2  -6   22.10    1.30
   2 -10  -6   23.20    1.40
   2 -10   6   21.60    1.30
   2 -10   6   20.00    1.30
  10   2   6   19.30    1.30
  10   1  -6    2.80    0.80
   1 -10  -6    2.30    0.60
  10   1  -6    2.00    0.50
   1 -10  -6    3.00    0.60
  10   1  -6    3.10    0.60
  10   1   6    2.40    0.50
   1 -10   6    3.20    0.80
   1 -10   6    2.20    0.50
   0 -10  -6    4.40    0.60
  10   0  -6    2.60    0.80
  10   0  -6    3.30    0.60
  10   0  -6    3.80    0.60
   0 -10  -6    4.50    0.60
  10   0   6    3.90    0.60
   0 -10   6    3.40    0.80
  10   0   6    4.30    0.60
   0 -10   6    3.70    0.60
  -1 -10  -6    1.30    0.50
  10  -1  -6    2.00    0.70
  10  -1  -6    2.60    0.50
  10  -1  -6    2.20    0.60
  -1 -10   6    3.10    0.50
  10  -1   6    2.40    0.50
  10  -1   6    2.20    0.50
  -1 -10   6    2.80    0.80
  -2 -10  -6   20.90    1.30
  10  -2  -6   21.50    1.30
  10  -2  -6   20.50    1.60
  10  -2  -6   20.70    1.40
  10  -2   6   21.50    1.40
  -2 -10   6   22.70    1.30
  10  -2   6   22.80    1.30
  -2 -10   6   21.90    1.80
  10  -3  -6   34.70    2.20
  10  -3  -6   34.20    1.90
  10  -3  -6   33.30    1.80
  -3 -10   6   35.60    2.40
  -3 -10   6   36.80    1.80
  10  -3   6   37.30    2.00
  10  -3   6   37.90    1.90
  10  -4  -6    9.50    0.90
  10  -4  -6   10.40    1.10
  -4 -10   6    8.20    0.90
  10  -4   6    8.20    0.90
  10  -4   6    7.40    1.00
  10  -4   6    7.90    0.80
  10  -5  -6    7.30    0.90
  10  -5  -6    8.30    0.90
  -5 -10   6    7.30    0.80
  10  -5   6    7.80    0.80
  10  -5   6    7.80    0.80
   5  10   6    6.10    0.70
  10  -5   6    7.80    1.00
  10  -6  -6   -0.20    0.40
   6  10  -6    0.10    0.50
  10  -6  -6   -0.10    0.50
  10  -6   6    0.00    0.50
  10  -6   6   -0.10    0.40
   6  10   6    0.40    0.50
   6  10   6    1.10    0.50
  10  -6   6    0.30    0.40
  10  -7  -6    0.60    0.40
   7  10  -6    1.10    0.50
  10  -7   6    0.20    0.40
   7  10   6    0.40    0.40
  10  -7   6    1.20    0.50
   7  10   6   -0.10    0.40
  10  -7   6    0.40    0.40
   8  10  -6    2.80    0.40
  10  -8  -6    2.50    0.50
  10  -8   6    3.00    0.50
   8  10   6    2.50    0.40
   8  10   6    2.60    0.40
   7 -11  -6    0.00    0.40
  11   7  -6    0.60    0.30
   7 -11  -6    0.10    0.40
  11   7   6    0.60    0.30
  11   6  -6    1.00    0.40
   6 -11  -6    1.50    0.50
   6 -11  -6    0.40    0.50
  11   6   6    1.80    0.40
   6 -11   6    1.30    0.40
   5 -11  -6    1.30    0.50
  11   5  -6    1.60    0.50
   5 -11  -6    1.40    0.50
  11   5   6    1.40    0.40
   5 -11   6    2.10    0.50
  11   4  -6    2.00    0.50
   4 -11  -6    1.60    0.50
   4 -11   6    2.30    0.60
  11   4   6    2.30    0.50
   4 -11   6    1.40    0.50
   3 -11  -6    3.40    0.60
  11   3  -6    3.00    0.60
   3 -11   6    3.60    0.60
  11   3   6    4.00    0.60
   3 -11   6    4.30    0.60
   2 -11  -6   10.00    1.00
  11   2  -6    8.40    0.90
   2 -11  -6   10.70    1.00
  11   2  -6    9.40    0.90
  11   2   6   10.10    0.90
   2 -11   6    8.60    0.90
  11   1  -6    4.10    0.60
   1 -11  -6    5.80    0.70
  11   1  -6    6.20    0.70
   1 -11  -6    5.50    0.70
  11   1   6    5.00    0.60
   1 -11   6    5.10    0.60
  11   0  -6   17.70    1.20
   0 -11  -6   17.70    1.20
  11   0  -6   16.50    1.10
  11   0  -6   18.00    1.50
  11   0   6   16.70    1.10
   0 -11   6   16.60    1.10
  11   0   6   16.30    1.20
  11  -1  -6    5.00    0.90
  -1 -11  -6    6.70    0.80
  11  -1  -6    6.00    0.60
  11  -1  -6    5.30    0.70
  11  -1   6    6.30    0.80
  11  -1   6    6.70    0.90
  -1 -11   6    4.80    0.60
  11  -2  -6    7.90    0.80
  11  -2  -6    8.70    0.90
  -2 -11  -6    8.60    0.90
  11  -2  -6    8.30    1.10
  -2 -11   6    9.10    0.90
  11  -2   6    9.30    0.90
  11  -2   6    9.90    0.90
  11  -3  -6    5.20    0.80
  11  -3  -6    4.30    0.60
  -3 -11   6    3.10    0.50
  11  -3   6    2.50    0.50
  11  -3   6    3.60    0.60
  11  -4  -6    2.30    0.60
  11  -4   6    1.70    0.50
  11  -4   6    2.10    0.50
  -4 -11   6    1.60    0.40
  11  -5  -6    0.80    0.50
   5  11   6    2.30    0.50
  11  -5   6    1.30    0.40
  11  -5   6    1.60    0.50
  11  -5   6    0.80    0.50
  -5 -11   6    1.00    0.40
  11  -6  -6    0.60    0.40
   6  11  -6    0.50    0.40
   6  11  -6    0.50    0.40
   6  11   6    0.50    0.40
  11  -6   6    0.70    0.40
  11  -6   6    0.70    0.40
  11  -6   6    0.90    0.50
   7  11  -6    0.80    0.40
  11  -7   6    0.10    0.30
   7  11   6    0.70    0.40
  12   5  -6    6.40    0.60
   5 -12  -6    5.80    0.70
  12   5   6    6.30    0.60
   4 -12  -6    1.00    0.40
  12   4  -6    0.80    0.40
   4 -12   6    1.50    0.40
  12   4   6    0.80    0.40
   3 -12  -6    2.20    0.50
  12   3  -6    2.40    0.40
   3 -12   6    2.90    0.50
  12   3   6    3.30    0.50
   3 -12   6    2.80    0.50
  12   2  -6    5.00    0.70
   2 -12  -6    4.20    0.60
  12   2  -6    5.10    0.70
  12   2   6    4.40    0.50
   2 -12   6    4.20    0.60
  12   1  -6    0.20    0.40
   1 -12  -6   -0.40    0.40
  12   1  -6    0.60    0.40
   1 -12   6    0.30    0.40
  12   1   6    0.20    0.40
   0 -12  -6    0.00    0.50
  12   0  -6    0.30    0.40
  12   0  -6   -0.20    0.40
   0 -12   6    0.10    0.40
  12   0   6   -0.20    0.40
  12   0   6   -0.20    0.40
  -1 -12  -6   -0.20    0.40
  12  -1  -6    0.40    0.40
  12  -1  -6    0.10    0.40
  -1 -12   6    0.70    0.50
  12  -1   6    0.10    0.40
  12  -1   6    0.10    0.40
  12  -2  -6    3.20    0.50
  -2 -12   6    4.30    0.60
  12  -2   6    4.90    0.60
  12  -2   6    5.80    0.70
  12  -3  -6    4.30    0.60
   3  12   6    2.30    0.50
  12  -3   6    2.70    0.50
  12  -3   6    2.20    0.40
  -3 -12   6    2.20    0.50
  12  -4  -6    0.60    0.40
   4  12   6    1.10    0.40
  12  -4   6    1.20    0.50
  -4 -12   6    1.30    0.40
  12  -4   6    1.20    0.40
   5  12  -6    6.60    0.60
  12  -5  -6    5.00    0.70
   5  12  -6    4.90    0.60
  12  -5   6    6.00    0.60
   5  12   6    7.20    0.60
  12  -5   6    6.10    0.70
   6  12   6    0.30    0.30
  13   2   6    0.60    0.30
  13   1  -6    6.60    0.60
  13   1  -6    7.00    0.60
  13   1   6    6.30    0.60
   1 -13   6    5.40    0.70
  13   0  -6    0.40    0.40
  13   0  -6    0.90    0.30
  13   0   6    1.30    0.30
   0 -13   6    1.00    0.40
  13  -1  -6    6.80    0.70
  -1 -13   6    6.20    0.60
  13  -1   6    6.20    0.60
  13  -1   6    6.70    0.60
   1  13   6    7.10    0.60
  13  -2  -6    1.60    0.40
  13  -2   6    1.70    0.40
   2  13   6    1.20    0.40
  13  -2   6    1.20    0.30
  13  -3  -6    4.90    0.60
   3  13   6    6.90    0.60
  13  -3   6    5.90    0.60
   0   0   7    0.90    0.30
   1   0   7 5502.35  305.17
   0   1   7 5471.25  304.87
  -1   1   7 2792.62  156.78
   1   1   7 2854.01  156.88
   1  -2  -7  691.23   32.50
   2   1   7  775.22   40.90
   2   0   7   58.89    3.60
   2  -1  -7  735.03   32.30
   1   2   7  724.23   40.70
   2   2  -7 9999.00  473.05
   2  -2  -7 9493.85  420.86
   2   2   7 9149.68  530.25
   3   2  -7   19.50    1.50
   2  -3  -7   23.10    1.40
   3   2   7   27.20    1.60
   3   2   7   23.60    1.80
   3   1  -7  507.45   25.60
   3   1  -7  523.75   22.60
   1  -3  -7  473.15   22.70
   3   1   7  514.15   28.70
   3   1   7  538.75   25.60
   0  -3  -7   65.29    3.20
   3   0  -7   67.09    3.10
   3   0   7   68.79    4.10
   3  -1  -7  543.85   23.60
   1   3  -7  520.35   26.60
   3  -2  -7   26.80    1.40
   2   3  -7   19.40    1.60
   2   3   7   27.90    1.60
   3  -3  -7  126.49    6.30
   3  -3  -7  136.39    7.30
   3   3  -7  150.08    7.10
   3   3   7  133.09    7.10
   3   3   7  130.99    7.90
   3  -4  -7  184.28   11.00
   3  -4  -7  202.68    9.50
   4   3  -7  208.48   10.70
   4   3   7  222.58   10.70
   4   3   7  216.48   12.00
   3  -4   7  209.28   11.10
   2  -4  -7  518.05   27.00
   2  -4  -7  513.85   22.80
   4   2  -7  510.05   25.70
   4   2   7  517.35   25.70
   2  -4   7  493.65   27.00
   4   2   7  515.35   28.80
   4   1  -7  518.25   25.20
   1  -4  -7  499.85   22.40
  -1   4  -7  524.85   25.10
   1  -4   7  506.45   26.50
   4   1   7  503.95   25.20
   4   1   7  461.55   28.20
   0  -4  -7  489.75   22.30
   0   4  -7  520.65   25.10
   4   0  -7  501.75   25.10
   4   0  -7  537.05   22.30
   4   0   7  474.45   28.20
   0  -4   7  486.05   26.50
  -1  -4  -7  482.75   22.40
   4  -1  -7  511.15   22.40
   1   4  -7  515.15   25.20
   4  -2  -7  488.45   22.10
   4  -2  -7  504.05   26.20
   2   4  -7  522.95   24.90
   2   4   7  510.35   24.90
   4  -2   7  457.25   26.20
   3   4  -7  221.18   10.90
   4  -3  -7  206.28    9.60
   4  -3  -7  228.78   11.30
   3   4   7  204.18   10.80
   3   4   7  204.78   12.20
   4  -3   7  194.78   11.20
   4  -4  -7   28.40    1.60
   4   4  -7   31.20    2.10
   4  -4  -7   29.50    1.80
   4  -4  -7   27.40    1.80
   4  -4   7   30.60    1.80
   4   4   7   25.50    2.30
   4   4   7   25.10    2.00
   5   4  -7  222.58   11.90
   4  -5  -7  231.58   10.50
   4  -5  -7  228.68   10.60
   4  -5  -7  236.28   12.30
   5   4   7  232.08   13.40
   4  -5   7  222.08   12.30
   5   4   7  222.58   11.90
   3  -5  -7   26.20    1.80
   5   3  -7   27.00    2.00
   3  -5  -7   28.00    1.60
   3  -5  -7   27.20    1.80
   5   3  -7   25.70    1.60
   5   3   7   32.30    2.10
   3  -5   7   27.10    1.80
   5   3   7   33.00    2.30
   2  -5  -7   35.00    2.00
   5   2  -7   38.30    2.20
   2  -5  -7   37.20    2.00
   5   2   7   26.10    2.30
   5   2   7   29.90    2.20
   2  -5   7   30.10    2.00
   5   1  -7  348.07   18.70
   1  -5  -7  384.56   16.70
   1  -5  -7  373.16   19.60
   5   1   7  369.16   18.80
   1  -5   7  392.26   19.60
   5   1   7  351.16   21.00
   0  -5  -7  136.39    6.30
   5   0  -7  132.59    7.00
   0   5  -7  133.99    7.00
   5   0   7  134.69    7.90
   0  -5   7  135.79    7.30
   5  -1  -7  366.36   15.80
  -1  -5  -7  351.26   15.80
   1   5  -7  366.36   17.90
  -1  -5   7  334.97   18.70
   5  -1   7  345.57   18.70
   2   5  -7   28.40    2.00
   5  -2  -7   24.70    1.70
   5  -2   7   34.30    1.90
   5  -3  -7   26.10    1.60
   5  -3  -7   26.50    1.50
   3   5  -7   26.20    1.90
   5  -3  -7   26.20    1.70
   3   5   7   27.20    1.90
   5  -3   7   21.40    1.70
   5  -4  -7  229.78   12.70
   5  -4  -7  227.88   10.90
   4   5  -7  230.28   12.30
   5  -4  -7  238.48   10.90
   4   5   7  254.27   13.90
   4   5   7  239.58   12.20
   5  -4   7  233.88   12.70
   5  -5  -7    6.20    0.80
   5  -5  -7    4.90    0.90
   5   5  -7    6.10    1.10
   5  -5  -7    3.80    0.90
   5   5   7    4.60    1.00
   5  -5   7    5.30    0.80
   5   5   7    4.50    1.10
   5  -6  -7   38.80    2.20
   5  -6  -7   36.60    2.50
   6   5  -7   38.90    2.80
   6   5   7   38.20    3.10
   6   5   7   40.30    2.80
   5  -6   7   37.10    2.50
   4  -6  -7  283.57   12.90
   4  -6  -7  276.67   12.90
   4  -6  -7  290.17   15.00
   6   4  -7  287.17   14.60
   6   4   7  274.67   16.30
   6   4   7  260.77   14.50
   4  -6   7  278.47   15.00
   6   3  -7  119.49    7.00
   3  -6  -7  128.59    6.20
   6   3  -7  135.49    6.10
   3  -6  -7  127.89    7.00
   3  -6  -7  129.39    6.10
   6   3   7  128.49    7.80
   3  -6   7  126.99    7.00
   6   3   7  124.29    7.00
   2  -6  -7   52.59    2.70
   6   2  -7   50.49    2.50
   6   2  -7   47.80    3.00
   2  -6  -7   53.49    2.60
   2  -6  -7   52.99    2.90
   6   2   7   45.20    3.10
   2  -6   7   45.10    2.90
   6   2   7   44.00    3.30
   6   1  -7   75.59    4.30
   6   1  -7   76.59    3.70
   1  -6  -7   78.89    3.90
   1  -6  -7   80.99    4.30
   1  -6  -7   77.49    3.80
   1  -6   7   83.09    4.40
   6   1   7   71.39    4.40
   6   1   7   73.99    3.70
   6   1   7   71.39    4.80
   6   0  -7    0.60    0.50
   0  -6  -7    1.10    0.60
   6   0  -7    1.10    0.40
   0  -6  -7   -0.20    0.50
   6   0   7    0.70    0.60
   6   0   7    1.90    0.50
   0  -6   7    0.80    0.50
   1   6  -7   79.09    4.40
   6  -1  -7   76.19    3.80
  -1  -6  -7   80.99    3.90
  -1  -6   7   77.19    4.40
   6  -1   7   78.69    3.80
   2   6  -7   43.60    2.80
   6  -2  -7   46.40    2.40
   6  -2  -7   40.20    2.50
   6  -2   7   44.40    2.80
  -2  -6   7   54.89    2.80
   6  -3  -7  127.49    6.20
   6  -3  -7  138.79    6.30
   3   6  -7  129.69    7.10
  -3  -6   7  135.69    7.30
   6  -3   7  128.89    7.30
   6  -4  -7  279.07   14.90
   6  -4  -7  276.57   12.70
   6  -4  -7  275.47   12.80
   4   6  -7  276.27   14.40
   6  -4   7  278.47   14.90
   4   6   7  276.07   14.30
   4   6   7  276.17   16.20
   6  -5  -7   36.00    2.10
   5   6  -7   38.90    2.70
   6  -5  -7   35.30    2.40
   5   6   7   35.80    2.60
   6  -5   7   34.20    2.40
   6   6  -7    5.10    1.20
   6  -6  -7    7.30    1.00
   6  -6  -7    6.10    1.00
   6  -6   7    6.70    1.10
   6   6   7    7.30    1.30
   7   6  -7    2.20    1.00
   7   6  -7    0.10    0.50
   6  -7  -7    1.90    0.80
   6  -7  -7    2.60    0.60
   6  -7  -7    1.90    0.70
   6  -7  -7    2.30    0.60
   6  -7   7    1.80    0.50
   6  -7   7    3.50    0.70
   6  -7   7    2.10    0.50
   6  -7   7    2.10    0.60
   7   6   7    2.50    0.60
   6  -7   7    2.10    0.90
   7   6   7    2.60    1.10
   7   6   7    2.70    0.60
   6  -7   7    2.00    0.60
   6  -7   7    2.50    0.60
   5  -7  -7   31.10    1.90
   7   5  -7   33.20    1.80
   5  -7  -7   32.00    1.70
   7   5  -7   34.30    2.60
   5  -7  -7   29.30    2.20
   5  -7   7   32.20    2.30
   5  -7   7   32.00    1.70
   5  -7   7   32.10    1.70
   7   5   7   29.80    2.50
   4  -7  -7   22.70    1.50
   4  -7  -7   24.40    1.80
   7   4  -7   22.70    2.10
   7   4   7   25.90    2.20
   4  -7   7   22.70    1.80
   3  -7  -7   37.80    2.20
   7   3  -7   40.80    2.20
   7   3  -7   42.00    2.80
   3  -7  -7   36.60    2.50
   3  -7   7   39.40    2.50
   7   3   7   37.50    2.80
   2  -7  -7   54.29    3.10
   7   2  -7   61.79    3.50
   2  -7  -7   59.09    3.30
   7   2  -7   57.49    2.90
   2  -7  -7   57.59    2.90
   7   2   7   47.80    3.40
   2  -7   7   48.20    3.30
   7   1  -7   89.79    4.50
   1  -7  -7   88.59    5.10
   7   1  -7   88.59    5.20
   1  -7  -7   94.89    4.50
   1  -7  -7   91.19    4.60
   1  -7   7   97.29    5.20
   0  -7  -7   97.29    4.80
   7   0  -7   97.99    4.70
   7   0   7   97.99    4.70
   0  -7   7   95.69    5.40
   7  -1  -7  108.49    4.80
  -1  -7  -7   95.09    4.90
  -1  -7   7  102.29    5.60
   7  -1   7   91.99    4.70
  -2  -7  -7   49.70    2.70
   7  -2  -7   48.30    2.60
  -2  -7   7   53.39    3.10
   7  -3  -7   41.70    2.20
   3   7  -7   36.10    2.60
  -3  -7   7   37.60    2.50
   7  -3   7   37.40    2.50
   4   7  -7   20.60    2.00
   7  -4  -7   20.20    1.50
  -4  -7   7   22.70    1.70
   7  -4   7   23.30    1.80
   7  -5  -7   32.50    2.00
   5   7  -7   33.20    2.60
  -5  -7   7   33.00    1.70
   7  -5   7   32.00    2.40
   7  -5   7   31.70    1.70
  -5  -7   7   33.30    2.30
   7  -6  -7    1.70    0.70
   6   7  -7    2.80    1.10
   7  -6  -7    2.80    0.60
   7  -6  -7    3.40    0.60
   6   7   7    2.40    0.60
   7  -6   7    0.90    0.60
   7  -6   7    2.30    0.50
   7  -6   7    2.10    0.60
   6   7   7    2.30    0.60
  -6  -7   7    1.80    0.80
   6   7   7    2.20    1.10
   7  -6   7    1.90    0.60
   7  -6   7    0.90    0.90
   7  -6   7    2.10    0.60
   7  -7  -7   72.69    3.80
   7  -7  -7   74.09    3.60
   7  -7  -7   73.39    3.40
   7   7  -7   72.29    4.70
   7   7  -7   73.19    3.50
   7   7   7   72.69    3.50
   7  -7   7   73.69    3.60
   7  -7   7   71.89    3.60
   7   7   7   72.49    3.40
   7  -7   7   72.89    3.40
   7  -7   7   72.29    3.50
   7   7   7   63.49    4.70
   7  -7   7   76.59    4.50
   7  -7   7   76.59    3.40
   7  -8  -7    3.30    0.60
   7  -8  -7    3.80    0.60
   8   7  -7    2.60    0.60
   7  -8   7    3.00    0.60
   7  -8   7    2.80    0.60
   8   7   7    2.90    0.60
   7  -8   7    2.60    0.60
   7  -8   7    2.50    0.60
   8   7   7    3.20    0.60
   6  -8  -7   14.50    1.20
   8   6  -7   15.10    1.20
   6  -8  -7   14.50    1.10
   6  -8  -7   16.30    1.60
   8   6   7   13.30    1.10
   6  -8   7   13.90    1.20
   6  -8   7   13.30    1.10
   6  -8   7   15.30    1.10
   6  -8   7   14.30    1.60
   8   6   7   14.30    1.10
   6  -8   7   13.60    1.10
   6  -8   7   15.20    1.20
   5  -8  -7   37.00    2.00
   5  -8  -7   38.70    1.90
   5  -8  -7   39.70    2.60
   8   5  -7   36.40    2.90
   8   5  -7   36.80    2.00
   5  -8   7   33.30    1.90
   5  -8   7   36.90    1.90
   5  -8   7   36.40    2.00
   8   5   7   32.30    1.90
   5  -8   7   37.60    2.60
   8   5   7   34.80    2.90
   8   5   7   35.40    1.90
   5  -8   7   35.30    1.90
   5  -8   7   36.60    2.00
   8   4  -7   33.90    1.90
   4  -8  -7   34.20    1.90
   4  -8  -7   32.30    2.00
   4  -8  -7   31.80    2.40
   8   4  -7   32.90    2.70
   4  -8  -7   33.20    2.10
   4  -8   7   37.70    1.90
   8   4   7   36.50    1.90
   4  -8   7   37.70    2.00
   4  -8   7   37.10    2.50
   8   4   7   39.40    2.90
   4  -8   7   37.90    1.90
   8   3  -7   29.70    2.50
   3  -8  -7   30.80    2.10
   8   3  -7   32.90    2.00
   3  -8  -7   33.30    1.70
   3  -8  -7   30.40    1.90
   3  -8  -7   32.80    1.70
   3  -8   7   29.50    1.60
   3  -8   7   27.30    2.20
   8   3   7   29.10    2.50
   2  -8  -7   19.80    1.40
   2  -8  -7   21.20    1.50
   8   2  -7   18.00    1.90
   8   2  -7   18.50    1.40
   2  -8   7   20.10    1.60
   2  -8   7   17.70    1.10
   8   1  -7   57.79    3.00
   1  -8  -7   56.99    2.70
   1  -8  -7   55.79    3.00
   1  -8   7   56.89    2.70
   1  -8   7   56.09    3.40
   0  -8  -7   11.30    1.20
   8   0  -7   12.50    1.10
   0  -8   7   11.10    1.20
   8   0   7   10.90    1.00
  -1  -8  -7   56.89    3.10
   8  -1  -7   58.09    3.10
  -1  -8   7   59.99    3.50
   8  -1   7   55.79    3.00
  -1  -8   7   59.89    2.70
   8  -2  -7   20.60    1.50
  -2  -8  -7   18.30    1.50
  -2  -8   7   19.20    1.60
  -2  -8   7   21.20    1.20
   8  -3  -7   30.70    1.90
  -3  -8  -7   33.20    2.10
  -3  -8   7   32.20    1.70
  -3  -8   7   31.10    2.20
   8  -4  -7   35.90    1.90
   8  -4  -7   35.70    1.90
  -4  -8  -7   34.20    2.20
   8  -4  -7   36.40    2.10
  -4  -8   7   32.70    2.30
   8  -4   7   33.80    1.80
   8  -4   7   32.10    1.90
  -4  -8   7   32.60    1.80
   8  -5  -7   37.90    2.00
   5   8  -7   33.70    2.80
   8  -5  -7   31.10    2.10
   8  -5  -7   35.80    2.00
  -5  -8   7   36.30    1.90
   8  -5   7   39.60    2.00
  -5  -8   7   39.30    2.50
   8  -5   7   36.10    1.90
   8  -5   7   37.00    2.00
   8  -6  -7   18.00    1.40
   8  -6  -7   15.40    1.20
   8  -6   7   15.00    1.20
   8  -6   7   15.80    1.10
   6   8   7   15.60    1.20
   8  -6   7   14.70    1.20
   6   8   7   13.40    1.10
   8  -6   7   15.70    1.70
  -6  -8   7   16.40    1.60
   8  -6   7   14.40    1.20
   8  -7  -7    2.20    0.60
   7   8  -7    4.00    0.70
   8  -7   7    3.20    0.60
   8  -7   7    3.80    0.60
   7   8   7    3.20    0.60
   8  -7   7    3.80    0.60
   8  -7   7    3.60    0.70
   7   8   7    2.90    0.60
   8  -8  -7    2.10    0.60
   8   8  -7    1.40    0.60
   8  -8   7    1.80    0.60
   8  -8   7    3.00    0.60
   8   8   7    2.10    0.50
   8   8   7    1.90    0.50
   8  -8   7    2.30    0.60
   9   8  -7    1.00    0.50
   8  -9  -7    0.60    0.40
   8  -9  -7    0.20    0.50
   9   8   7    0.90    0.40
   9   8   7    0.60    0.40
   9   7  -7   15.60    1.20
   7  -9  -7   18.30    1.10
   7  -9  -7   16.70    1.20
   9   7   7   17.20    1.10
   7  -9   7   15.90    1.20
   7  -9   7   18.40    1.20
   9   7   7   14.10    1.10
   6  -9  -7   20.30    1.30
   6  -9  -7   21.30    1.40
   9   6  -7   19.40    1.40
   6  -9   7   22.60    1.40
   6  -9   7   22.70    1.40
   9   6   7   20.30    1.30
   9   6   7   20.90    1.30
   6  -9   7   19.60    1.30
   5  -9  -7    0.40    0.50
   9   5  -7    1.60    0.60
   5  -9  -7   -0.40    0.70
   5  -9  -7    0.60    0.50
   5  -9   7    1.50    0.80
   5  -9   7    0.50    0.50
   5  -9   7    0.50    0.50
   9   5   7    0.80    0.50
   9   5   7    0.50    0.50
   5  -9   7    1.00    0.60
   9   4  -7   18.00    2.00
   4  -9  -7   16.10    1.50
   4  -9  -7   15.60    1.20
   9   4  -7   16.20    1.20
   4  -9  -7   16.00    1.10
   4  -9   7   14.70    1.20
   4  -9   7   16.10    1.20
   4  -9   7   14.70    1.10
   9   4   7   15.90    1.10
   4  -9   7   14.40    1.20
   4  -9   7   16.10    1.60
   9   4   7   16.60    1.10
   9   3  -7   27.50    2.40
   3  -9  -7   25.80    1.50
   9   3  -7   26.40    1.50
   3  -9  -7   26.10    1.50
   9   3  -7   24.40    1.50
   3  -9  -7   25.10    1.60
   3  -9   7   29.40    2.10
   9   3   7   25.50    1.50
   3  -9   7   24.60    1.50
   3  -9   7   23.70    1.60
   3  -9   7   25.20    1.50
   9   3   7   25.20    1.50
   9   2  -7   39.10    2.40
   9   2  -7   40.20    2.10
   9   2  -7   41.10    2.10
   2  -9  -7   42.80    2.10
   2  -9  -7   42.70    2.10
   2  -9   7   44.40    2.80
   9   2   7   39.60    2.10
   2  -9   7   40.00    2.10
   2  -9   7   41.10    2.10
   9   1  -7   22.80    1.40
   9   1  -7   23.40    1.40
   1  -9  -7   23.00    1.40
   9   1  -7   23.80    1.70
   1  -9  -7   23.30    1.40
   1  -9   7   24.20    1.30
   9   1   7   19.20    1.40
   1  -9   7   28.50    1.90
   9   0  -7   12.20    0.90
   9   0  -7   10.50    1.20
   0  -9  -7   13.20    1.00
   0  -9  -7   14.30    1.30
   9   0  -7   12.20    1.10
   0  -9  -7   12.30    0.90
   0  -9   7   10.40    1.00
   9   0   7   11.70    1.00
   0  -9   7   12.60    1.40
   9   0   7   12.00    0.90
   9  -1  -7   22.10    1.40
  -1  -9  -7   22.30    1.30
   9  -1  -7   23.50    1.50
  -1  -9  -7   25.10    1.80
   9  -1  -7   25.00    1.70
   9  -1   7   22.70    1.60
   9  -1   7   25.90    1.40
  -1  -9   7   24.10    1.80
   9  -1   7   25.70    1.50
  -1  -9   7   25.80    1.40
  -2  -9  -7   40.10    2.50
   9  -2  -7   42.00    2.20
   9  -2  -7   40.80    2.40
   9  -2   7   41.20    2.20
  -2  -9   7   46.40    2.80
  -2  -9   7   42.80    2.10
   9  -2   7   42.30    2.10
  -3  -9  -7   26.80    1.90
   9  -3  -7   25.30    1.70
   9  -3  -7   22.60    1.50
   9  -3   7   28.00    1.50
   9  -3   7   24.30    1.50
  -3  -9   7   27.00    2.00
   9  -3   7   26.30    1.50
  -3  -9   7   27.10    1.50
   9  -4  -7   15.50    1.30
   9  -4  -7   14.20    1.20
  -4  -9  -7   15.00    1.50
   9  -4   7   15.20    1.20
  -4  -9   7   16.60    1.10
  -4  -9   7   16.10    1.50
   9  -4   7   14.70    1.10
   9  -4   7   14.10    1.10
   9  -5  -7    0.30    0.50
  -5  -9  -7    1.10    0.90
   9  -5  -7    0.10    0.50
   9  -5  -7   -0.10    0.60
   9  -5   7   -0.30    0.50
  -5  -9   7    0.90    0.50
   9  -5   7    0.60    0.50
   9  -5   7    0.80    0.40
  -5  -9   7   -0.10    0.70
  -6  -9  -7   20.10    1.80
   9  -6  -7   18.20    1.50
   9  -6  -7   24.00    1.30
   6   9   7   19.70    1.30
   9  -6   7   20.80    1.40
   6   9   7   20.40    1.30
   9  -6   7   18.50    1.30
   9  -6   7   19.20    1.30
   7   9  -7   15.70    1.20
   9  -7  -7   16.30    1.20
  -7  -9  -7   17.20    1.60
   9  -7   7   17.00    1.10
   7   9   7   16.30    1.10
   9  -7   7   18.60    1.30
   7   9   7   16.10    1.20
   9  -7   7   15.50    1.10
   9  -7   7   16.10    1.20
   8   9  -7   -0.20    0.40
   9  -8  -7    0.80    0.40
   8   9   7    0.00    0.40
   9  -8   7    0.50    0.40
   8   9   7    1.10    0.40
   9  -8   7    0.60    0.40
   9   9  -7   -0.20    0.40
   9  -9  -7    0.00    0.40
   9   9   7   -0.30    0.30
   9   9   7    0.00    0.30
   8 -10  -7    2.00    0.50
   8 -10  -7    2.50    0.40
  10   8  -7    2.80    0.40
  10   8   7    2.20    0.40
  10   8   7    2.20    0.40
   7 -10  -7    3.90    0.60
  10   7  -7    4.90    0.60
   7 -10  -7    4.10    0.60
  10   7   7    4.60    0.50
  10   7   7    5.10    0.50
   6 -10  -7    2.10    0.60
  10   6  -7    2.40    0.50
   6 -10  -7    2.30    0.50
  10   6   7    2.90    0.50
  10   6   7    2.30    0.50
   6 -10   7    3.10    0.50
   5 -10  -7    9.40    1.00
  10   5  -7   10.80    0.90
   5 -10  -7    8.40    1.00
  10   5   7    9.00    0.80
   5 -10   7    6.80    0.90
  10   5   7    8.90    0.90
   4 -10  -7    5.40    0.70
   4 -10  -7    3.90    0.70
  10   4  -7    4.50    0.60
   4 -10   7    4.60    0.70
  10   4   7    4.30    0.60
   4 -10   7    3.90    0.60
  10   3  -7    4.80    0.60
  10   3  -7    2.90    0.60
   3 -10  -7    3.70    0.60
   3 -10   7    3.10    0.60
  10   3   7    3.30    0.60
   3 -10   7    4.30    0.90
   3 -10   7    2.80    0.60
  10   2  -7   32.40    1.80
   2 -10  -7   34.10    1.80
  10   2  -7   35.00    1.80
   2 -10  -7   31.40    1.80
   2 -10   7   30.70    1.80
  10   2   7   33.60    1.80
   2 -10   7   33.30    1.80
   2 -10   7   38.10    2.50
   1 -10  -7    4.40    0.60
  10   1  -7    3.40    0.60
   1 -10  -7    4.80    0.70
  10   1  -7    4.10    0.60
  10   1  -7    3.20    0.80
   1 -10   7    3.30    0.60
   1 -10   7    3.60    0.90
  10   1   7    3.90    0.60
  10   0  -7  108.29    5.20
  10   0  -7   96.09    4.60
   0 -10  -7   98.99    4.70
  10   0  -7  102.09    4.80
   0 -10  -7  103.59    4.60
   0 -10   7  103.09    4.60
   0 -10   7  105.29    5.90
  10   0   7  105.49    4.60
  10   0   7  100.49    4.70
  -1 -10  -7    3.30    0.60
  10  -1  -7    4.00    0.60
  10  -1  -7    4.30    0.90
  10  -1  -7    3.50    0.60
  -1 -10   7    4.30    0.60
  10  -1   7    4.60    0.60
  -1 -10   7    3.90    0.90
  10  -1   7    3.90    0.60
  10  -2  -7   33.30    1.70
  -2 -10  -7   33.70    1.80
  10  -2  -7   33.30    2.10
  10  -2  -7   33.70    1.90
  -2 -10   7   33.90    1.80
  10  -2   7   34.20    1.80
  -2 -10   7   31.90    2.30
  10  -2   7   31.70    1.80
  10  -3  -7    2.90    0.70
  10  -3  -7    3.40    0.60
  -3 -10   7    3.60    0.80
  10  -3   7    2.90    0.60
  10  -3   7    3.30    0.60
  -3 -10   7    2.70    0.60
  10  -4  -7    3.80    0.80
  10  -4  -7    4.30    0.60
  10  -4   7    2.50    0.60
  10  -4   7    4.50    0.70
  -4 -10   7    5.40    0.60
  10  -4   7    4.10    0.60
  10  -5  -7    8.00    1.00
  10  -5  -7    7.90    0.90
  10  -5   7    8.80    1.00
  10  -5   7    9.50    0.90
  -5 -10   7    9.10    0.80
   5  10   7   10.60    1.00
  10  -5   7    9.80    0.90
   6  10  -7    3.10    0.60
  10  -6  -7    1.90    0.50
  10  -6   7    2.60    0.50
  10  -6   7    2.30    0.60
   6  10   7    2.70    0.50
   6  10   7    2.70    0.50
  10  -6   7    2.30    0.50
  10  -7  -7    4.50    0.50
   7  10  -7    4.70    0.60
  10  -7   7    3.30    0.60
  10  -7   7    4.00    0.50
   7  10   7    4.10    0.50
   7  10   7    4.00    0.50
  10  -7   7    4.30    0.50
   8  10  -7    2.00    0.40
  10  -8  -7    2.30    0.50
   8  10   7    1.80    0.40
  10  -8   7    2.40    0.50
   7 -11  -7    0.70    0.40
  11   7  -7    0.00    0.30
   7 -11  -7    0.60    0.40
  11   7   7    0.50    0.30
  11   6  -7    1.70    0.40
   6 -11  -7    1.80    0.50
   6 -11  -7    2.30    0.50
  11   6   7    1.20    0.40
   5 -11  -7    3.60    0.60
  11   5  -7    4.00    0.50
   5 -11  -7    3.50    0.50
  11   5   7    3.80    0.50
   5 -11   7    3.70    0.50
  11   4  -7    2.10    0.50
   4 -11  -7    1.60    0.50
   4 -11   7    2.20    0.50
  11   4   7    1.80    0.40
   4 -11   7    1.50    0.50
  11   3  -7    9.80    0.90
   3 -11  -7   12.60    1.00
   3 -11   7   13.00    1.00
  11   3   7   11.80    0.90
   3 -11   7   12.20    1.00
  11   2  -7   21.00    1.30
   2 -11  -7   21.50    1.40
  11   2  -7   21.90    1.30
   2 -11   7   22.20    1.30
  11   2   7   21.10    1.30
  11   1  -7    0.20    0.40
   1 -11  -7    0.10    0.50
   1 -11  -7   -0.20    0.50
  11   1  -7   -0.60    0.40
   1 -11   7    1.00    0.50
  11   1   7   -0.30    0.40
  11   0  -7   12.70    1.10
  11   0  -7   13.00    1.00
   0 -11  -7   11.80    1.00
   0 -11  -7   12.30    1.00
  11   0  -7   12.40    1.30
  11   0   7   13.50    1.00
  11   0   7   12.90    1.00
   0 -11   7   12.50    1.00
  -1 -11  -7    0.40    0.40
  11  -1  -7    0.40    0.50
  11  -1  -7    0.00    0.70
  11  -1  -7    0.30    0.40
  -1 -11   7    0.90    0.50
  11  -1   7    0.30    0.40
  11  -1   7   -0.10    0.50
  11  -2  -7   22.50    1.40
  11  -2  -7   20.10    1.60
  -2 -11   7   21.30    1.30
  11  -2   7   20.30    1.30
  11  -2   7   21.20    1.30
  11  -3  -7   12.50    1.00
  11  -3  -7   13.00    1.20
  -3 -11   7   11.20    0.90
  11  -3   7   11.90    0.90
  11  -3   7   11.40    1.00
  11  -4  -7    1.90    0.50
   4  11   7    1.90    0.50
  11  -4   7    1.70    0.50
  -4 -11   7    2.20    0.40
  11  -4   7    2.10    0.50
  11  -5  -7    3.90    0.60
   5  11   7    3.30    0.50
  11  -5   7    3.80    0.50
  -5 -11   7    6.20    0.60
  11  -5   7    3.90    0.50
  11  -5   7    3.40    0.60
  11  -6  -7    1.70    0.50
   6  11  -7    1.90    0.40
   6  11  -7    1.20    0.40
  11  -6   7    2.00    0.40
   6  11   7    1.90    0.40
  11  -6   7    1.40    0.40
  11  -6   7    1.00    0.50
   7  11  -7   -0.20    0.30
  11  -7   7    0.50    0.30
   7  11   7    0.90    0.40
   5 -12  -7    2.30    0.40
  12   5  -7    2.20    0.40
  12   5   7    2.80    0.40
  12   4  -7    7.90    0.70
   4 -12  -7    7.20    0.70
   4 -12   7    7.80    0.70
  12   4   7    7.80    0.70
   3 -12  -7    0.90    0.40
  12   3  -7    0.40    0.40
  12   3   7    0.70    0.40
   3 -12   7    0.40    0.50
  12   2  -7    0.70    0.40
   2 -12  -7    0.90    0.50
  12   2  -7    1.00    0.40
   2 -12   7    0.40    0.40
  12   2   7    1.00    0.40
  12   1  -7    3.40    0.50
   1 -12  -7    2.60    0.50
  12   1  -7    3.50    0.50
  12   1   7    4.20    0.50
   1 -12   7    3.90    0.60
  12   0  -7    2.20    0.50
  12   0  -7    2.30    0.40
   0 -12   7    2.60    0.50
  12   0   7    2.70    0.50
  12  -1  -7    4.00    0.60
  -1 -12  -7    4.40    0.60
  -1 -12   7    3.80    0.60
  12  -1   7    4.40    0.50
  12  -1   7    3.90    0.50
  12  -2  -7    1.20    0.50
  -2 -12   7    0.80    0.40
  12  -2   7    1.00    0.40
  12  -2   7    0.50    0.40
  12  -3  -7    0.40    0.40
  12  -3   7   -0.20    0.40
  12  -3   7    0.20    0.40
   3  12   7    0.90    0.40
  -3 -12   7    0.60    0.40
  12  -4  -7    8.40    0.80
  12  -4   7    8.00    0.70
  12  -4   7    7.90    0.80
   4  12   7    7.90    0.70
  -4 -12   7    8.40    0.70
  12  -5  -7    2.50    0.40
   5  12  -7    2.70    0.40
   5  12  -7    2.50    0.40
   5  12   7    2.60    0.40
  12  -5   7    2.10    0.40
  12  -5   7    3.00    0.50
   6  12   7    0.80    0.30
  13   2   7    0.80    0.30
  13   1  -7    0.90    0.40
  13   1   7    1.40    0.40
  13   0  -7    2.80    0.40
   0 -13   7    3.40    0.50
  13   0   7    2.70    0.40
  13  -1  -7    1.30    0.40
   1  13   7    1.30    0.40
  13  -1   7    0.90    0.30
  13  -1   7    1.30    0.40
  13  -2  -7    0.60    0.40
   2  13   7    1.00    0.30
  13  -2   7    1.10    0.30
  13  -2   7    1.00    0.40
  13  -3  -7    1.30    0.40
   3  13   7    2.50    0.40
  13  -3   7    1.60    0.40
   0   0   8 1790.12   99.49
   1   0   8 1226.48   70.29
   0   1   8 1302.97   70.29
   1   1   8 9468.15  508.95
  -1   1   8 8855.91  508.35
   2   1   8 5564.64  309.07
   0   2   8   16.90    1.30
   2   0   8   18.90    1.40
   1   2   8 5567.54  309.27
   2   2  -8 4808.02  225.48
   2  -2  -8 4593.24  200.78
   2   2   8 4430.46  253.07
   2   2   8 4397.86  225.38
   2  -3  -8  368.56   16.90
  -2   3  -8  378.46   19.00
   3   2  -8  400.36   19.00
   3   2   8  350.76   21.30
   3   2   8  388.46   19.00
   3   1  -8  746.83   37.20
   1  -3  -8  726.23   33.10
  -1   3  -8  742.13   37.10
   3   1   8  796.92   37.20
   3   1   8  718.43   41.70
   3   0  -8  367.46   15.50
   0  -3  -8  337.27   15.60
   0   3  -8  346.67   17.50
   3   0   8  340.77   19.60
   1   3  -8  759.02   37.40
   3  -1  -8  743.73   33.30
   2   3  -8  395.86   19.10
   3  -2  -8  377.16   17.00
   2   3   8  375.76   19.00
   2   3   8  367.46   21.40
   3   3  -8 1752.72   84.59
   3  -3  -8 1681.23   75.29
   3  -3  -8 1795.02   89.39
   3   3   8 1587.74   94.79
   3   3   8 1722.83   84.49
   3  -3   8 1677.93   89.39
   3  -4  -8  937.81   47.00
   4   3  -8  911.41   44.60
   3  -4  -8  933.51   39.70
   4   3   8  868.21   44.50
   4   3   8  851.71   49.99
   3  -4   8  851.71   47.00
   2  -4  -8   99.19    5.90
   4   2  -8   91.59    5.80
   2  -4  -8  100.79    5.20
   2  -4   8  122.19    6.00
   4   2   8  122.99    6.60
   4   2   8  124.29    5.90
   1  -4  -8  200.38    9.20
  -1   4  -8  197.68   10.30
   4   1  -8  200.48   10.30
   1  -4   8  208.78   10.80
   4   1   8  197.68   11.60
   4   1   8  204.08   10.40
   4   0  -8   47.60    2.30
   0   4  -8   52.39    2.70
   0  -4  -8   44.50    2.40
   4   0  -8   44.70    2.70
   0  -4   8   46.80    2.70
   4   0   8   46.50    3.00
  -1  -4  -8  203.88    9.50
   1   4  -8  206.68   10.70
   4  -1  -8  218.58    9.50
   4  -2  -8  125.19    6.40
   4  -2  -8  121.69    5.50
   2   4  -8  115.49    6.20
   2   4   8  106.79    6.10
   3   4  -8  856.81   44.00
   4  -3  -8  881.41   39.20
   4  -3  -8  896.51   46.40
   4  -3   8  872.01   46.40
   3   4   8  908.71   44.00
   3   4   8  873.01   49.40
   4   4  -8  312.37   15.30
   4  -4  -8  283.17   13.60
   4  -4  -8  306.77   13.60
   4  -4  -8  305.37   15.90
   4   4   8  293.47   15.30
   4  -4   8  291.07   15.90
   4   4   8  297.37   17.20
   4  -5  -8   77.39    3.90
   4  -5  -8   78.29    4.30
   5   4  -8   68.99    4.40
   4  -5  -8   78.49    3.80
   5   4   8   77.79    5.00
   5   4   8   73.99    4.40
   4  -5   8   73.69    4.30
   3  -5  -8  230.18   12.50
   3  -5  -8  237.88   10.80
   5   3  -8  226.98   10.70
   3  -5  -8  236.98   10.70
   5   3  -8  232.58   12.10
   5   3   8  242.08   12.10
   3  -5   8  216.08   12.50
   5   3   8  246.08   13.60
   2  -5  -8  313.07   14.40
   5   2  -8  312.17   16.20
   2  -5  -8  331.47   16.80
   2  -5   8  314.37   16.80
   5   2   8  320.57   18.10
   5   2   8  308.97   16.20
   5   1  -8   54.19    2.70
   1  -5   8   40.00    2.60
   5   1   8   42.40    2.70
   5   1   8   42.60    3.00
   0  -5  -8   15.80    1.20
   0   5  -8   15.70    1.20
   5   0  -8   15.20    1.20
   5   0   8   16.00    1.50
   0  -5   8   15.40    1.10
   5  -1  -8   41.90    2.20
   1   5  -8   38.20    2.60
  -1  -5  -8   39.20    2.20
   5  -1   8   50.79    2.60
   5  -2  -8  308.67   13.90
   2   5  -8  315.97   15.60
   5  -2  -8  298.47   13.80
   5  -2   8  301.87   16.30
   5  -3  -8  232.28   10.90
   5  -3  -8  241.78   12.80
   5  -3  -8  238.48   10.90
   3   5  -8  240.18   12.30
   3   5   8  238.18   12.20
   3   5   8  240.38   13.80
   5  -3   8  232.78   12.70
   5  -4  -8   74.89    4.20
   4   5  -8   64.59    4.20
   5  -4  -8   72.79    3.60
   5  -4  -8   72.69    3.80
   5  -4   8   71.59    4.20
   4   5   8   78.99    4.90
   4   5   8   76.49    4.30
   5  -5  -8    1.50    0.60
   5  -5  -8    0.70    0.70
   5  -5  -8    1.40    0.60
   5   5  -8    0.20    0.70
   5   5   8    1.00    0.80
   5  -5   8    2.20    0.60
   5   5   8    0.60    0.70
   6   5  -8   17.20    1.80
   5  -6  -8   15.00    1.20
   5  -6  -8   15.20    1.40
   5  -6   8   15.30    1.40
   6   5   8   13.50    1.60
   6   4  -8   20.10    2.00
   4  -6  -8   22.10    1.50
   4  -6  -8   21.70    1.70
   4  -6  -8   22.30    1.60
   4  -6   8   23.00    1.70
   6   4   8   21.40    1.90
   6   4   8   24.80    2.20
   6   3  -8  145.99    8.40
   3  -6  -8  154.78    8.50
   3  -6  -8  149.99    7.40
   3  -6  -8  155.28    7.50
   6   3  -8  162.88    7.40
   6   3   8  152.38    8.40
   6   3   8  163.18    9.50
   3  -6   8  170.98    8.60
   6   2  -8   23.20    1.40
   2  -6  -8   22.00    1.40
   2  -6  -8   20.20    1.50
   2  -6  -8   21.40    1.60
   6   2  -8   20.20    1.70
   6   2   8   20.50    1.90
   2  -6   8   24.00    1.50
   6   2   8   19.10    1.70
   1  -6  -8   88.89    4.30
   6   1  -8   82.79    4.20
   1  -6  -8   93.39    4.40
   6   1  -8   84.59    4.90
   6   1   8   84.79    5.50
   1  -6   8   93.79    5.00
   6   1   8   90.19    5.00
   0  -6  -8   77.09    3.80
   6   0  -8   73.59    3.80
   0  -6  -8   73.59    3.90
   0  -6   8   82.79    4.40
   6   0   8   79.19    4.90
   6   0   8   80.79    3.80
   1   6  -8   90.89    5.00
  -1  -6  -8   87.49    4.40
   6  -1  -8   84.99    4.40
   6  -1   8   93.09    4.40
  -1  -6   8   99.99    5.10
   6  -2  -8   22.00    1.40
   2   6  -8   20.90    1.70
   6  -2  -8   20.60    1.50
   6  -2   8   21.70    1.50
  -2  -6   8   23.10    1.60
   3   6  -8  172.08    9.00
   6  -3  -8  176.88    8.00
   6  -3  -8  167.48    7.90
   6  -3   8  158.38    9.20
  -3  -6   8  169.88    9.20
   6  -4  -8   25.50    1.60
   6  -4  -8   24.90    1.70
   4   6  -8   20.30    1.90
   4   6   8   23.50    2.30
   6  -4   8   24.00    1.80
   4   6   8   24.20    1.90
   6  -5  -8   14.10    1.20
   5   6  -8   17.60    1.70
   6  -5  -8   14.70    1.40
   5   6   8   13.70    1.60
   6  -5   8   16.60    1.50
   6  -6  -8   60.49    3.20
   6  -6  -8   56.99    3.70
   6   6  -8   63.79    4.00
   6  -6   8   60.19    2.90
   6  -6   8   59.19    3.00
   6   6   8   62.49    4.00
   6  -6   8   65.09    3.80
   6  -7  -8   18.70    1.50
   6  -7  -8   17.30    1.70
   7   6  -8   16.00    2.00
   6  -7  -8   18.90    1.30
   7   6  -8   15.70    1.30
   6  -7  -8   17.30    1.20
   6  -7   8   20.70    1.30
   6  -7   8   17.20    1.20
   7   6   8   18.60    1.20
   7   6   8   20.60    2.10
   6  -7   8   20.30    1.70
   6  -7   8   19.70    1.30
   6  -7   8   19.70    1.30
   7   6   8   19.60    1.20
   6  -7   8   17.40    1.40
   6  -7   8   19.80    1.30
   5  -7  -8    5.30    0.70
   7   5  -8    5.00    1.20
   7   5  -8    5.60    0.70
   5  -7  -8    4.20    0.80
   5  -7  -8    4.70    0.90
   5  -7   8    5.60    0.70
   7   5   8    6.00    1.30
   7   5   8    6.40    0.80
   5  -7   8    5.10    0.70
   5  -7   8    4.80    0.90
   7   4  -8   30.10    2.40
   4  -7  -8   28.50    2.00
   4  -7  -8   27.20    1.80
   4  -7   8   28.80    2.10
   7   4   8   29.10    2.40
   3  -7  -8   30.20    1.80
   7   3  -8   30.40    2.40
   3  -7  -8   28.00    2.00
   7   3  -8   30.20    1.80
   7   3   8   29.90    2.40
   3  -7   8   31.60    2.10
   2  -7  -8    2.20    0.70
   2  -7  -8    2.70    0.60
   7   2  -8    2.80    0.60
   7   2  -8    2.80    0.90
   2  -7  -8    2.80    0.70
   2  -7   8    3.10    0.70
   7   2   8    1.40    0.80
   7   1  -8   43.30    2.90
   1  -7  -8   41.90    2.40
   7   1  -8   44.80    2.40
   1  -7  -8   41.00    2.50
   1  -7   8   48.90    2.70
   0  -7  -8   24.00    1.60
   7   0  -8   24.80    1.50
   0  -7   8   24.10    1.70
   7   0   8   25.90    1.50
  -1  -7  -8   51.19    2.70
   7  -1  -8   55.09    2.70
   7  -1   8   44.60    2.50
  -1  -7   8   49.99    3.00
   7  -2  -8    3.90    0.70
  -2  -7  -8    3.80    0.80
  -2  -7   8    2.20    0.60
   3   7  -8   30.90    2.30
   7  -3  -8   33.70    1.90
  -3  -7   8   28.10    2.10
   7  -3   8   28.90    2.10
   4   7  -8   28.30    2.30
   7  -4  -8   30.40    1.80
   7  -4   8   27.60    2.10
  -4  -7   8   28.60    1.50
  -4  -7   8   30.30    2.10
   5   7  -8    6.40    1.30
   7  -5  -8    6.20    0.90
   7  -5   8    6.00    1.10
  -5  -7   8    6.60    1.00
   7  -5   8    6.20    0.70
   7  -5   8    5.90    0.70
  -5  -7   8    5.50    0.60
   7  -6  -8   18.10    1.50
   6   7  -8   20.20    2.00
   7  -6  -8   19.10    1.30
   7  -6   8   19.10    1.30
   6   7   8   17.10    1.30
   7  -6   8   18.90    1.20
   7  -6   8   18.50    1.30
   7  -6   8   18.80    1.30
   7  -6   8   18.30    1.70
   6   7   8   18.20    1.20
   6   7   8   19.20    2.10
  -6  -7   8   20.40    1.80
   7  -6   8   19.90    1.40
   7  -7  -8    5.90    0.80
   7   7  -8    5.40    0.70
   7  -7  -8    6.00    0.90
   7  -7  -8    7.00    0.80
   7  -7   8    7.20    0.90
   7  -7   8    7.30    0.90
   7  -7   8    7.50    0.90
   7   7   8    5.60    0.70
   7   7   8    7.10    0.90
   7  -7   8    7.80    0.90
   7  -7   8    7.10    0.90
   7  -7   8    5.50    1.10
   7  -8  -8   36.70    1.80
   7  -8  -8   34.30    1.90
   8   7  -8   34.00    1.80
   8   7   8   31.10    1.80
   7  -8   8   33.20    1.80
   7  -8   8   29.70    1.80
   7  -8   8   32.30    1.80
   8   7   8   30.70    1.80
   7  -8   8   33.60    1.90
   6  -8  -8   10.70    1.10
   8   6  -8    9.00    1.00
   6  -8  -8    9.90    1.00
   6  -8  -8   11.90    1.40
   6  -8   8    9.60    1.00
   6  -8   8   11.10    1.00
   8   6   8   11.20    1.00
   6  -8   8    9.90    1.10
   6  -8   8    8.70    0.90
   6  -8   8   11.40    1.40
   6  -8   8   10.10    1.00
   8   6   8   12.50    1.00
   5  -8  -8    8.20    1.00
   5  -8  -8    9.00    1.10
   5  -8  -8    9.20    0.90
   8   5  -8    8.80    1.50
   5  -8  -8    9.10    1.30
   8   5  -8    8.80    0.90
   8   5   8    6.70    0.80
   8   5   8    6.10    1.40
   5  -8   8    7.70    1.00
   5  -8   8    6.90    0.90
   8   5   8    7.80    1.00
   5  -8   8    7.40    0.80
   5  -8   8    7.30    0.90
   5  -8   8    6.70    1.10
   5  -8   8    8.80    1.00
   8   4  -8   19.60    2.10
   4  -8  -8   17.60    1.40
   4  -8  -8   18.30    1.30
   4  -8  -8   17.70    1.70
   4  -8  -8   20.10    1.50
   8   4  -8   21.00    1.30
   4  -8   8   22.90    1.80
   8   4   8   22.90    1.30
   4  -8   8   22.40    1.30
   4  -8   8   24.20    1.40
   8   4   8   23.30    2.20
   4  -8   8   23.30    1.40
   3  -8  -8    9.70    0.90
   3  -8  -8    9.30    1.10
   8   3  -8    7.20    1.40
   3  -8  -8    8.40    0.90
   3  -8  -8    9.50    1.10
   8   3  -8    8.30    1.10
   8   3   8    8.30    0.90
   3  -8   8    7.10    1.20
   3  -8   8    9.90    0.80
   2  -8  -8  248.88   11.50
   8   2  -8  244.28   13.00
   2  -8  -8  258.27   10.70
   8   2  -8  254.17   11.50
   2  -8   8  234.18   10.70
   2  -8   8  237.98   13.30
   1  -8  -8   15.60    1.30
   8   1  -8   15.90    1.30
   1  -8  -8   16.10    1.00
   1  -8   8   15.80    1.00
   1  -8   8   16.00    1.40
   8   0  -8   92.59    4.40
   0  -8  -8   89.29    4.50
   0  -8   8   90.19    5.10
   0  -8   8   84.09    4.00
   8  -1  -8   14.80    1.20
  -1  -8  -8   12.60    1.30
  -1  -8   8   14.90    1.00
  -1  -8   8   15.50    1.30
   8  -1   8   11.90    1.10
   8  -2  -8  241.88   11.40
  -2  -8  -8  244.08   11.50
  -2  -8   8  246.68   13.30
  -2  -8   8  250.07   10.70
  -3  -8  -8    7.60    1.10
   8  -3  -8   11.10    1.10
  -3  -8   8    8.00    0.80
   8  -3   8   10.70    0.90
  -3  -8   8    7.80    1.20
   8  -4  -8   21.30    1.60
  -4  -8  -8   24.00    1.80
   8  -4  -8   21.10    1.40
   8  -4  -8   21.80    1.40
  -4  -8   8   22.10    1.80
   8  -4   8   23.00    1.40
   8  -4   8   20.50    1.30
  -4  -8   8   20.60    1.30
   8  -5  -8    8.00    0.90
   8  -5  -8    8.40    1.10
   5   8  -8    8.30    1.40
  -5  -8   8    9.00    0.90
   8  -5   8    9.60    1.00
  -5  -8   8   10.00    1.30
   8  -5   8    9.50    0.90
   8  -5   8   10.40    0.90
   8  -6  -8   12.10    1.00
   8  -6  -8   10.30    1.20
   8  -6   8   10.50    1.10
   8  -6   8   10.50    1.40
  -6  -8   8    9.20    0.90
   8  -6   8    8.10    1.00
  -6  -8   8   11.90    1.40
   8  -6   8   10.40    1.00
   6   8   8   13.60    1.10
   8  -6   8    9.00    1.00
   6   8   8   10.90    1.00
   7   8  -8   29.60    1.80
   8  -7  -8   32.20    1.80
   8  -7   8   34.60    1.80
   8  -7   8   32.50    1.80
   7   8   8   32.00    1.70
   8  -7   8   32.40    1.90
   8  -7   8   33.50    1.80
   7   8   8   31.80    1.80
   8  -8  -8    1.50    0.50
   8   8  -8    1.60    0.50
   8   8   8    0.40    0.50
   8  -8   8    1.40    0.50
   8   8   8    0.70    0.50
   8  -8   8    1.70    0.50
   9   8  -8    1.60    0.50
   8  -9  -8    1.30    0.50
   8  -9  -8    1.80    0.40
   9   8   8    1.90    0.40
   9   8   8    1.30    0.40
   7  -9  -8    8.10    0.80
   9   7  -8    6.90    0.90
   7  -9  -8    5.70    0.70
   9   7   8    6.60    0.70
   7  -9   8    6.70    0.80
   9   7   8    5.40    0.70
   7  -9   8    4.80    0.70
   6  -9  -8    5.60    0.70
   6  -9  -8    5.90    0.70
   9   6  -8    6.30    0.70
   9   6   8    5.90    0.70
   6  -9   8    6.80    0.90
   6  -9   8    5.70    0.70
   6  -9   8    5.20    0.70
   9   6   8    4.30    0.60
   5  -9  -8    6.20    0.70
   9   5  -8    6.90    0.80
   5  -9  -8    5.80    1.00
   5  -9  -8    6.00    0.80
   9   5   8    7.40    0.80
   5  -9   8    6.30    0.70
   5  -9   8    6.70    1.10
   5  -9   8    5.80    0.80
   9   5   8    5.70    0.70
   4  -9  -8    5.10    0.70
   9   4  -8    2.40    1.10
   9   4  -8    5.10    0.70
   4  -9  -8    5.70    0.80
   4  -9   8    4.30    0.70
   4  -9   8    5.60    0.80
   4  -9   8    5.90    1.00
   9   4   8    5.80    0.70
   4  -9   8    4.80    0.70
   4  -9   8    5.20    0.70
   9   4   8    4.80    0.60
   9   3  -8    6.60    0.70
   3  -9  -8    6.00    0.70
   9   3  -8    5.40    1.30
   3  -9  -8    6.70    0.80
   9   3  -8    6.40    0.70
   3  -9   8    6.30    1.10
   9   3   8    6.50    0.80
   3  -9   8    5.10    0.70
   3  -9   8    5.40    0.70
   9   3   8    5.60    0.70
   9   2  -8   15.60    1.20
   2  -9  -8   18.70    1.20
   9   2  -8   17.80    1.40
   9   2  -8   17.80    1.20
   2  -9  -8   16.10    1.20
   2  -9   8   18.10    1.10
   9   2   8   16.60    1.10
   2  -9   8   17.50    1.20
   9   2   8   17.40    1.10
   2  -9   8   17.50    1.60
   9   1  -8    0.10    0.50
   9   1  -8    0.30    0.60
   1  -9  -8   -0.40    0.40
   1  -9  -8    0.00    0.70
   9   1  -8    0.90    0.50
   1  -9  -8    0.30    0.50
   9   1   8    0.40    0.40
   1  -9   8    0.10    0.40
   1  -9   8   -0.20    0.70
   0  -9  -8  150.98    6.50
   0  -9  -8  140.89    7.10
   9   0  -8  147.19    6.50
   0  -9  -8  145.39    6.60
   9   0  -8  147.69    6.70
   9   0  -8  141.99    7.10
   0  -9   8  145.29    6.50
   0  -9   8  157.68    8.20
   9   0   8  149.39    6.70
   9   0   8  149.88    6.50
   9  -1  -8    0.30    0.60
  -1  -9  -8    1.10    0.50
   9  -1  -8    0.50    0.50
  -1  -9  -8    1.10    0.70
   9  -1   8    0.90    0.50
  -1  -9   8    0.60    0.40
  -1  -9   8    0.30    0.60
   9  -1   8    0.80    0.50
   9  -2  -8   17.10    1.40
  -2  -9  -8   15.40    1.50
   9  -2  -8   18.30    1.20
  -2  -9   8   17.30    1.10
  -2  -9   8   17.40    1.60
   9  -2   8   19.00    1.10
   9  -2   8   15.80    1.20
   9  -3  -8    6.30    0.70
   9  -3  -8    6.30    0.90
  -3  -9  -8    6.70    1.10
  -3  -9   8    7.50    1.20
   9  -3   8    6.10    0.70
  -3  -9   8    6.10    0.70
   9  -3   8    5.80    0.60
   9  -3   8    5.00    0.70
   9  -4  -8    4.40    0.70
  -4  -9  -8    5.30    1.10
   9  -4  -8    5.10    0.90
   9  -4   8    5.70    0.70
   9  -4   8    5.10    0.60
   9  -4   8    5.20    0.70
  -4  -9   8    6.00    1.00
  -4  -9   8    4.10    0.60
   9  -5  -8    7.30    0.90
  -5  -9  -8    6.40    1.10
   9  -5  -8    6.50    0.90
   9  -5  -8    7.40    1.00
  -5  -9   8    5.50    1.00
   9  -5   8    6.70    0.80
  -5  -9   8    5.80    0.70
   9  -5   8    6.10    0.70
   5   9   8    6.40    0.80
   9  -5   8    6.70    0.70
   9  -6  -8    4.70    0.60
  -6  -9  -8    5.30    1.10
   9  -6  -8    5.10    0.80
   6   9   8    5.20    0.70
   9  -6   8    5.10    0.70
   9  -6   8    5.70    0.70
   6   9   8    6.10    0.70
   9  -6   8    6.10    0.80
  -7  -9  -8    4.80    1.00
   7   9  -8    5.80    0.70
   9  -7  -8    6.40    0.80
   9  -7   8    7.60    0.90
   7   9   8    7.40    0.80
   9  -7   8    6.20    0.80
   7   9   8    6.70    0.70
   9  -7   8    6.00    0.80
   8   9  -8    1.20    0.50
   9  -8  -8    2.00    0.50
   8   9   8    0.90    0.40
   9  -8   8    1.30    0.50
   8   9   8    1.10    0.40
   9  -8   8    1.30    0.40
   9   9  -8   10.10    0.80
   9  -9  -8   11.90    0.90
   9   9   8   11.60    0.80
   9   9   8   10.60    0.70
   8 -10  -8    1.20    0.40
   8 -10  -8    0.50    0.40
  10   8  -8    0.90    0.40
  10   8   8    1.30    0.30
  10   8   8    1.20    0.30
   7 -10  -8   -0.40    0.50
  10   7  -8    0.20    0.40
   7 -10  -8    0.20    0.40
  10   7   8   -0.20    0.40
  10   7   8    0.40    0.40
   6 -10  -8    8.20    1.00
   6 -10  -8    8.80    0.90
  10   6  -8   10.30    0.90
  10   6   8   10.20    0.80
  10   6   8   10.70    0.90
   6 -10   8    8.80    0.90
   5 -10  -8    8.20    0.90
   5 -10  -8    8.70    1.00
  10   5  -8   11.20    0.90
  10   5   8    8.10    0.80
   5 -10   8    8.00    0.90
  10   5   8    8.40    0.80
   4 -10  -8    4.00    0.70
  10   4  -8    4.40    0.60
   4 -10  -8    4.50    0.70
   4 -10   8    4.80    0.60
  10   4   8    5.30    0.60
   4 -10   8    4.80    0.60
  10   4   8    6.10    0.80
   3 -10  -8   37.40    1.90
  10   3  -8   34.80    1.80
  10   3  -8   36.20    1.90
  10   3   8   34.10    1.80
   3 -10   8   32.60    1.80
   3 -10   8   32.40    1.80
   3 -10   8   36.10    2.50
   2 -10  -8    2.70    0.60
  10   2  -8    3.00    0.60
   2 -10  -8    2.60    0.60
  10   2  -8    3.10    0.60
   2 -10   8    2.00    0.50
  10   2   8    3.00    0.50
   2 -10   8    3.30    0.90
  10   1  -8   23.50    1.70
   1 -10  -8   23.60    1.40
   1 -10  -8   21.80    1.40
  10   1  -8   21.80    1.40
  10   1  -8   21.50    1.30
   1 -10   8   19.30    1.80
  10   1   8   21.50    1.30
   1 -10   8   20.20    1.30
  10   0  -8    1.20    0.40
  10   0  -8   -0.10    0.50
   0 -10  -8    0.60    0.50
  10   0  -8    1.10    0.70
   0 -10  -8    0.70    0.50
   0 -10   8   -0.30    0.60
  10   0   8    0.10    0.50
  10   0   8    0.20    0.50
   0 -10   8    0.40    0.50
  -1 -10  -8   23.30    1.40
  10  -1  -8   22.60    1.70
  10  -1  -8   22.30    1.50
  -1 -10   8   22.90    1.30
  10  -1   8   22.80    1.40
  10  -1   8   24.10    1.40
  -1 -10   8   21.50    1.80
  10  -2  -8    1.00    0.70
  10  -2  -8    3.10    0.60
  -2 -10   8    3.10    0.80
  10  -2   8    3.30    0.60
  -2 -10   8    3.00    0.60
  10  -2   8    2.40    0.60
  10  -3  -8   34.50    2.00
  10  -3  -8   35.50    2.20
  -3 -10  -8   33.50    2.30
  10  -3   8   37.10    1.90
  -3 -10   8   39.20    2.50
  10  -3   8   36.50    2.00
  -3 -10   8   39.20    1.90
  -4 -10  -8    4.20    1.00
  10  -4  -8    4.50    0.70
  10  -4  -8    4.90    0.80
  -4 -10   8    4.50    0.60
  10  -4   8    3.60    0.70
  10  -4   8    4.20    0.60
  10  -4   8    3.30    0.50
  10  -5  -8    9.30    0.90
  -5 -10  -8    7.30    1.10
  10  -5  -8    8.30    1.00
  10  -5   8    8.80    0.90
  -5 -10   8    9.10    0.80
  10  -5   8    9.90    1.00
   5  10   8    8.70    0.90
  10  -5   8    8.80    0.80
  10  -6  -8    9.70    0.90
   6  10  -8   10.00    1.00
  10  -6   8    8.60    1.00
  10  -6   8    9.40    0.80
  10  -6   8    9.70    0.90
   6  10   8    9.40    0.90
  10  -7  -8   -0.20    0.40
   7  10  -8    0.40    0.50
   7  10   8    0.10    0.40
  10  -7   8   -0.10    0.40
  10  -7   8    1.50    0.60
  10  -7   8    0.60    0.40
  10  -8  -8    1.40    0.40
   8  10  -8    0.90    0.40
  10  -8   8    1.20    0.40
   8  10   8    0.90    0.40
  11   7  -8    1.20    0.40
   7 -11  -8    0.80    0.40
   7 -11  -8    1.50    0.40
  11   7   8    1.60    0.30
  11   6  -8    2.00    0.40
   6 -11  -8    2.20    0.50
   6 -11  -8    2.00    0.50
  11   6   8    1.70    0.40
   5 -11  -8    6.50    0.70
  11   5  -8    4.50    0.60
   5 -11  -8    4.30    0.60
   5 -11   8    3.50    0.60
  11   5   8    5.00    0.60
   4 -11  -8    4.10    0.60
  11   4  -8    4.10    0.60
  11   4   8    3.20    0.50
   4 -11   8    3.80    0.60
   4 -11   8    4.10    0.60
  11   3  -8    3.30    0.60
  11   3  -8    4.60    0.60
   3 -11  -8    3.50    0.60
   3 -11   8    4.00    0.60
   3 -11   8    3.50    0.60
  11   3   8    3.60    0.50
  11   2  -8   11.30    1.00
  11   2  -8    9.50    0.90
   2 -11  -8   10.30    1.00
   2 -11   8   10.30    0.90
  11   2   8   10.30    0.90
  11   1  -8   24.90    1.40
   1 -11  -8   25.20    1.50
  11   1  -8   27.00    1.50
   1 -11  -8   23.30    1.50
   1 -11   8   24.90    1.40
  11   1   8   25.30    1.40
  11   0  -8   -0.10    0.40
   0 -11  -8   -0.20    0.50
  11   0  -8    0.10    0.70
   0 -11  -8   -0.10    0.40
  11   0  -8    0.30    0.50
  11   0   8   -0.10    0.40
  11   0   8   -0.10    0.40
   0 -11   8   -0.10    0.40
  11  -1  -8   25.00    1.50
  -1 -11  -8   24.70    1.40
  11  -1  -8   22.00    1.70
  -1 -11   8   26.00    1.40
  11  -1   8   23.10    1.40
  11  -1   8   26.10    1.50
  11  -2  -8   11.10    1.20
  11  -2  -8    9.60    1.00
  11  -2   8   10.40    1.00
  11  -2   8    9.50    0.90
  -2 -11   8   10.50    0.90
  11  -3  -8    3.90    0.60
  11  -3  -8    4.40    0.80
  11  -3   8    3.90    0.50
  -3 -11   8    4.00    0.60
  11  -3   8    3.50    0.60
  11  -4  -8    3.40    0.60
   4  11   8    5.10    0.60
  -4 -11   8    4.80    0.60
  11  -4   8    3.40    0.60
  11  -4   8    3.90    0.50
  11  -5  -8    4.60    0.60
  11  -5   8    3.50    0.60
  -5 -11   8    5.00    0.60
   5  11   8    4.00    0.50
  11  -5   8    6.00    0.70
  11  -5   8    4.40    0.60
   6  11  -8    1.90    0.40
   6  11  -8    2.30    0.50
   6  11   8    2.50    0.40
  11  -6   8    2.40    0.50
  11  -6   8    2.50    0.40
  11  -6   8    2.40    0.40
   7  11  -8    1.20    0.40
  11  -7   8    1.10    0.40
   7  11   8    1.20    0.40
  12   5  -8    0.90    0.30
   5 -12  -8    0.60    0.40
  12   5   8    1.30    0.30
  12   4  -8    1.40    0.40
   4 -12  -8    0.70    0.40
  12   4   8    1.00    0.40
   3 -12  -8    2.50    0.50
  12   3  -8    2.60    0.40
   3 -12   8    2.00    0.50
  12   3   8    2.80    0.40
   2 -12  -8    4.00    0.60
  12   2  -8    4.60    0.60
  12   2  -8    3.10    0.50
   2 -12   8    4.30    0.60
  12   2   8    4.50    0.50
  12   1  -8   -0.10    0.40
  12   1  -8    0.30    0.40
   1 -12  -8   -0.20    0.40
   1 -12   8    0.00    0.40
  12   1   8    0.50    0.40
  12   0  -8    0.50    0.40
  12   0   8    0.90    0.40
   0 -12   8    0.50    0.40
  12  -1  -8    0.30    0.40
  -1 -12   8    0.10    0.40
  12  -1   8    1.00    0.40
  12  -1   8    0.80    0.40
  12  -2  -8    3.60    0.50
  12  -2   8    5.30    0.60
  12  -2   8    4.70    0.60
  -2 -12   8    4.40    0.60
  12  -3  -8    2.40    0.50
   3  12   8    2.20    0.50
  12  -3   8    2.00    0.50
  -3 -12   8    2.20    0.50
  12  -3   8    1.70    0.40
  12  -4  -8    0.20    0.40
  12  -4   8   -0.20    0.40
   4  12   8    0.90    0.40
  -4 -12   8    0.30    0.40
  12  -4   8    0.70    0.40
  12  -5  -8    0.80    0.40
   5  12  -8    1.30    0.40
   5  12  -8    1.20    0.40
  12  -5   8    1.00    0.40
   5  12   8    1.40    0.40
  12  -5   8    1.30    0.30
   6  12   8    0.00    0.30
  13   2   8    0.50    0.30
  13   1  -8    3.60    0.50
  13   1   8    4.20    0.50
  13   0  -8    1.90    0.40
  13   0   8    1.00    0.30
   0 -13   8    1.00    0.40
  13  -1  -8    3.80    0.50
  13  -1   8    4.60    0.50
   1  13   8    4.70    0.50
  13  -2  -8    0.90    0.40
  13  -2   8    0.80    0.30
   2  13   8    1.20    0.30
  13  -2   8    0.20    0.30
  13  -3  -8    0.50    0.30
   0   0   9    2.20    0.40
   0   1   9    7.70    0.80
   1   0   9    7.40    0.90
  -1   1   9   30.60    2.00
   1   1   9   35.40    2.20
   2   1   9 4179.78  229.88
  -1   2   9 4106.59  230.08
   0   2   9  392.76   22.40
   2   0   9  408.26   22.50
   1   2  -9 4436.86  210.08
   1   2   9 4054.39  235.78
   2  -2  -9  553.64   24.80
   2   2  -9  576.74   27.80
   2   2   9  553.04   27.80
   2   2   9  553.14   31.20
  -2   2   9  547.65   31.00
   2  -3  -9  384.86   17.40
   3   2  -9  427.26   19.60
  -2   3  -9  399.06   19.50
   3   2   9  342.27   21.90
   3   2   9  384.76   19.50
   3   1  -9  522.15   25.40
   1  -3  -9  486.85   22.60
  -1   3  -9  524.05   25.40
   3   1   9  496.05   28.50
   3   0  -9  229.38    9.90
   0   3  -9  216.48   11.20
   3   0   9  217.28   12.60
   1   3  -9  529.45   26.60
   3  -1  -9  544.35   23.60
   1   3   9  519.15   29.80
   2   3  -9  405.96   19.80
   3  -2  -9  380.96   17.60
   2   3   9  378.66   22.20
   2   3   9  407.06   19.80
   3  -3  -9    5.50    0.70
   3  -3  -9    5.80    0.70
   3   3  -9    6.80    0.90
   3   3   9    4.60    0.90
   3   3   9    4.00    0.80
   3  -3   9    8.30    0.70
   3  -4  -9  636.64   28.30
   3  -4  -9  602.04   33.40
   4   3  -9  615.14   31.80
   3  -4   9  633.64   33.40
   4   3   9  664.53   35.70
   4   3   9  650.53   31.80
   2  -4  -9  356.26   19.60
   2  -4  -9  392.06   16.70
  -2   4  -9  367.96   18.70
   4   2  -9  369.06   18.70
   4   2   9  368.96   21.00
   2  -4   9  347.77   19.60
   4   2   9  393.26   18.80
   1  -4  -9  299.27   13.10
   4   1  -9  295.37   14.70
  -1   4  -9  290.07   14.70
   4   1   9  286.57   16.50
   1  -4   9  278.87   15.40
   0  -4  -9   28.80    1.70
   4   0  -9   33.20    1.70
   0   4  -9   33.60    2.00
   4   0  -9   29.50    1.90
   0  -4   9   31.50    1.90
   4   0   9   30.20    2.20
   4  -1  -9  281.67   13.10
  -1  -4  -9  292.57   13.10
   1   4  -9  297.97   14.80
   4  -2  -9  367.86   17.00
   2   4  -9  373.16   19.10
   2   4   9  412.26   19.10
   4  -2   9  349.37   20.00
   2   4   9  393.16   21.50
   4  -3  -9  612.14   27.30
   4  -3  -9  646.14   32.30
   3   4  -9  631.44   30.70
   3   4   9  614.44   30.70
   4  -3   9  556.44   32.30
   3   4   9  611.74   34.50
   4  -4  -9  292.27   13.00
   4   4  -9  279.77   14.60
   4  -4  -9  288.27   13.00
   4  -4  -9  278.97   15.10
   4   4   9  279.87   14.50
   4  -4   9  289.37   15.10
   4   4   9  273.67   16.30
   4  -5  -9  203.48    9.70
   5   4  -9  204.28   11.00
   4  -5  -9  210.18    9.80
   4  -5  -9  216.38   11.30
   5   4   9  215.98   12.40
   4  -5   9  218.58   11.30
   5   4   9  200.28   11.00
   5   3  -9   17.70    1.70
   3  -5  -9   19.00    1.30
   3  -5  -9   19.90    1.40
   5   3  -9   18.20    1.20
   3  -5  -9   19.70    1.50
   5   3   9   27.20    2.00
   3  -5   9   25.10    1.50
   5   3   9   22.10    1.70
   5   2  -9  345.07   17.60
   2  -5  -9  348.17   18.40
   2  -5  -9  339.67   15.80
   2  -5  -9  352.46   15.70
   5   2   9  351.66   19.80
   5   2   9  349.87   17.70
   2  -5   9  337.97   18.40
   1  -5  -9   12.40    1.10
  -1   5  -9   11.10    1.10
   5   1  -9   14.00    1.20
   1  -5   9    9.60    0.90
   5   1   9    9.70    1.20
   0  -5  -9   59.49    3.00
   5   0  -9   59.69    3.40
   0   5  -9   59.39    3.40
   0  -5   9   62.09    3.40
   5   0   9   60.19    3.90
   1   5  -9    9.40    1.00
  -1  -5  -9    8.40    0.90
   5  -1  -9    8.80    0.90
  -1  -5   9   11.60    0.90
   5  -2  -9  345.17   15.40
   2   5  -9  348.27   17.20
   5  -2  -9  333.97   15.20
   5  -2   9  323.57   17.90
   5  -3  -9   25.10    1.60
   5  -3  -9   25.90    1.40
   3   5  -9   22.70    1.80
   3   5   9   21.40    1.70
   3   5   9   21.50    2.00
   5  -3   9   20.30    1.50
   5  -4  -9  216.48   11.80
   5  -4  -9  219.08   10.20
   4   5  -9  212.18   11.50
   5  -4  -9  220.58   10.10
   4   5   9  222.98   11.40
   4   5   9  225.18   12.90
   5  -4   9  215.88   11.80
   5  -5  -9   35.90    2.00
   5  -5  -9   33.70    2.30
   5   5  -9   31.90    2.50
   5  -5  -9   38.60    2.30
   5  -5   9   33.40    2.20
   5   5   9   33.30    2.40
   5   5   9   36.20    2.90
   5  -6  -9    7.00    0.90
   6   5  -9    8.90    1.40
   5  -6  -9    6.60    1.00
   5  -6   9    6.60    1.10
   6   5   9    6.70    1.20
   6   4  -9   60.79    3.90
   4  -6  -9   61.49    3.20
   4  -6  -9   61.29    3.50
   4  -6  -9   62.79    3.60
   6   4   9   61.99    3.80
   6   4   9   60.69    4.30
   4  -6   9   61.59    3.70
   3  -6  -9  174.88    8.80
   6   3  -9  185.18   10.00
   3  -6  -9  193.98    8.80
   6   3  -9  186.58    8.70
   3  -6  -9  189.98   10.10
   6   3   9  188.88   11.10
   3  -6   9  198.08   10.20
   6   3   9  179.28   10.00
   2  -6  -9  143.89    6.70
   6   2  -9  138.99    7.50
   2  -6  -9  142.89    6.60
   6   2  -9  140.29    6.50
   2  -6  -9  145.59    7.60
   2  -6   9  136.19    7.60
   6   2   9  134.29    8.40
   6   2   9  131.09    7.50
   6   1  -9   61.69    3.30
   1  -6  -9   66.39    3.40
   6   1  -9   62.89    3.80
   1  -6  -9   65.79    3.30
   6   1   9   72.29    4.30
   1  -6   9   68.79    3.80
   0  -6  -9  184.58    8.70
   0  -6  -9  192.38    8.80
   6   0  -9  186.68    8.70
   6   0   9  179.48   10.90
   0  -6   9  192.28   10.20
   6   0   9  191.38    8.70
   6  -1  -9   72.59    3.60
   1   6  -9   75.09    4.10
  -1  -6  -9   70.79    3.60
  -1  -6   9   71.09    4.10
   6  -2  -9  143.39    6.50
   2   6  -9  136.39    7.40
  -2  -6  -9  140.39    6.60
   6  -2   9  129.79    7.60
  -2  -6   9  143.59    7.60
   6  -3  -9  209.78    9.30
   6  -3  -9  200.98    9.30
   3   6  -9  200.18   10.50
   6  -3   9  195.08   10.80
   3   6   9  197.98   11.90
  -3  -6   9  195.18   10.80
   6  -4  -9   66.39    3.20
   4   6  -9   57.69    3.80
   6  -4  -9   61.89    3.40
   4   6   9   63.19    3.80
   6  -4   9   61.69    3.70
   4   6   9   60.09    4.40
   5   6  -9    9.00    1.40
   6  -5  -9    8.10    1.10
   6  -5  -9    7.30    0.90
   6  -5   9    7.10    1.10
   5   6   9    4.30    1.10
   6  -6  -9    3.50    0.80
   6  -6  -9    3.50    0.90
   6   6  -9    3.70    1.10
   6  -6   9    4.20    0.90
  -6  -6   9    3.20    0.60
   6  -6   9    2.80    0.60
   6  -6   9    3.30    0.60
   6   6   9    4.20    1.10
   7   6  -9   66.09    3.30
   6  -7  -9   70.59    4.30
   7   6  -9   65.79    4.40
   6  -7  -9   69.69    3.30
   6  -7  -9   71.49    3.70
   6  -7  -9   72.69    3.40
   6  -7   9   69.49    3.40
   7   6   9   73.29    3.30
   6  -7   9   65.69    3.20
   6  -7   9   69.89    3.40
   6  -7   9   70.29    4.30
   7   6   9   68.59    3.20
   6  -7   9   69.59    3.30
   7   6   9   69.29    4.50
   6  -7   9   66.39    3.40
   6  -7   9   70.09    3.30
   5  -7  -9   19.30    1.30
   7   5  -9   20.90    2.10
   5  -7  -9   18.90    1.70
   7   5  -9   21.70    1.40
   5  -7  -9   21.30    1.60
   5  -7   9   24.80    1.40
   7   5   9   19.00    1.20
   5  -7   9   23.00    1.40
   7   5   9   21.00    2.10
   5  -7   9   22.00    1.80
   7   4  -9   61.89    4.00
   4  -7  -9   57.99    3.70
   4  -7  -9   58.39    3.20
   4  -7   9   65.09    3.70
   7   4   9   63.69    4.00
   7   3  -9   26.20    2.10
   3  -7  -9   26.80    1.70
   3  -7  -9   21.30    1.50
   7   3  -9   22.90    1.50
   7   3   9   19.90    2.00
   3  -7   9   20.10    1.70
   7   2  -9   55.49    2.90
   2  -7  -9   57.59    3.00
   7   2  -9   60.29    3.60
   2  -7  -9   56.69    3.20
   2  -7   9   57.39    3.40
   1  -7  -9   54.89    3.20
   7   1  -9   63.69    3.70
   7   1  -9   64.69    3.10
   1  -7  -9   60.79    3.10
   1  -7   9   56.89    3.50
   0  -7  -9  169.48    8.50
   7   0  -9  183.18    8.40
   7   0   9  180.78    8.40
   0  -7   9  188.08    9.80
  -1  -7  -9   59.09    3.10
   7  -1  -9   60.79    3.10
  -1  -7   9   59.79    3.50
  -2  -7  -9   62.89    3.30
   7  -2  -9   64.99    3.20
   2   7  -9   58.59    3.70
  -2  -7   9   62.09    3.70
  -3  -7  -9   21.40    1.60
   3   7  -9   19.40    1.90
   7  -3  -9   20.80    1.40
  -3  -7   9   21.90    1.60
   7  -3   9   21.20    1.70
   7  -4  -9   57.59    3.10
   4   7  -9   61.29    3.80
  -4  -7   9   58.29    3.60
   7  -4   9   62.39    3.60
  -4  -7   9   56.39    2.80
   5   7  -9   23.30    2.10
   7  -5  -9   19.00    1.50
  -5  -7   9   21.10    1.20
  -5  -7   9   20.80    1.80
   7  -5   9   19.20    1.30
   7  -5   9   19.40    1.70
   7  -5   9   20.70    1.30
   7  -6  -9   71.09    3.40
   7  -6  -9   68.29    3.70
   6   7  -9   72.69    4.60
  -6  -7   9   81.19    4.30
   7  -6   9   65.39    4.30
   7  -6   9   68.49    3.40
   7  -6   9   72.59    3.40
   7  -6   9   71.09    3.30
   6   7   9   74.49    3.40
   7  -6   9   62.69    3.30
   7  -6   9   71.89    3.40
  -6  -7   9   70.09    3.30
   7  -6   9   69.59    3.30
   7  -7  -9   11.40    1.10
   7  -7  -9    9.70    1.20
   7   7  -9   11.70    1.00
   7  -7   9   12.20    1.00
   7  -7   9   10.50    1.20
   7  -7   9   12.70    1.50
   7  -7   9   11.70    1.00
   7   7   9   10.20    0.90
   7  -7   9    9.90    1.00
   7   7   9   11.40    1.10
   7  -7   9   10.40    1.00
   7  -7   9   10.90    1.10
   8   7  -9    2.00    0.60
   7  -8  -9    1.40    0.60
   7  -8  -9    1.70    0.50
   8   7   9    1.10    0.50
   8   7   9    1.50    0.50
   7  -8   9    1.60    0.60
   7  -8   9    2.00    0.60
   7  -8   9    1.10    0.50
   7  -8   9    1.60    0.60
   7  -8   9    1.50    0.60
   6  -8  -9    3.70    0.70
   6  -8  -9    4.00    0.60
   6  -8  -9    4.20    0.80
   6  -8  -9    2.60    0.90
   8   6  -9    3.60    0.70
   8   6   9    4.50    0.60
   6  -8   9    5.40    0.70
   6  -8   9    5.10    0.70
   6  -8   9    6.40    0.70
   6  -8   9    4.60    1.00
   6  -8   9    6.40    0.70
   6  -8   9    6.90    0.90
   8   6   9    4.50    0.70
   8   5  -9   27.20    1.50
   5  -8  -9   27.10    1.80
   8   5  -9   24.90    2.30
   5  -8  -9   24.00    2.00
   5  -8  -9   25.80    1.60
   5  -8  -9   25.10    1.50
   5  -8   9   24.00    1.50
   5  -8   9   27.20    1.60
   8   5   9   23.40    1.40
   5  -8   9   24.30    1.50
   8   5   9   24.40    1.50
   5  -8   9   22.90    1.50
   5  -8   9   25.50    2.00
   5  -8   9   23.30    1.50
   4  -8  -9  102.49    5.10
   4  -8  -9  103.29    4.70
   8   4  -9   98.19    4.70
   4  -8  -9   95.09    5.90
   4  -8  -9  102.69    4.90
   8   4  -9  107.39    6.20
   4  -8   9  111.09    4.70
   4  -8   9  103.59    4.90
   4  -8   9  109.29    6.00
   4  -8   9  100.89    4.70
   8   4   9  105.69    4.70
   3  -8  -9   62.89    3.20
   3  -8  -9   60.39    2.80
   8   3  -9   59.29    3.20
   8   3  -9   60.89    3.90
   8   3  -9   55.19    2.90
   3  -8   9   60.99    2.80
   8   3   9   57.39    2.80
   3  -8   9   60.19    2.80
   2  -8  -9   10.20    0.90
   2  -8  -9    9.90    1.10
   8   2  -9    9.60    1.10
   8   2  -9   10.60    1.50
   2  -8   9   10.80    1.20
   2  -8   9    9.40    0.80
   1  -8  -9    2.00    0.70
   8   1  -9    3.10    0.70
   1  -8  -9    2.20    0.50
   1  -8   9    1.60    0.50
   1  -8   9    1.70    0.70
   0  -8  -9   37.70    2.20
   0  -8  -9   37.90    1.90
   8   0  -9   36.80    2.10
   0  -8   9   34.10    1.80
   0  -8   9   38.50    2.40
  -1  -8  -9    2.70    0.80
   8  -1  -9    2.30    0.70
  -1  -8  -9    2.60    0.50
  -1  -8   9    1.50    0.70
  -1  -8   9    3.20    0.50
  -2  -8  -9   12.30    1.20
   8  -2  -9    9.80    1.00
  -2  -8   9    9.80    1.20
  -2  -8   9   10.60    0.90
  -3  -8  -9   59.59    3.40
   8  -3  -9   61.59    3.30
  -3  -8   9   60.99    2.90
   8  -3   9   64.69    2.90
  -3  -8   9   64.29    3.80
   8  -4  -9   99.39    4.70
   8  -4  -9   98.89    5.00
  -4  -8  -9   93.49    5.10
   8  -4  -9   96.89    4.80
   4   8  -9  105.59    6.00
   8  -4   9  104.59    4.60
  -4  -8   9  110.59    5.90
   8  -4   9  100.39    4.70
  -4  -8   9  104.79    4.60
   8  -5  -9   25.10    1.80
   5   8  -9   26.00    2.40
   8  -5  -9   22.50    1.60
  -5  -8  -9   26.50    2.00
   8  -5   9   27.10    1.60
   8  -5   9   25.40    1.50
  -5  -8   9   28.10    2.10
   8  -5   9   26.50    1.60
   5   8   9   28.60    1.60
  -5  -8   9   28.10    1.50
   8  -6  -9    5.00    0.70
   8  -6  -9    4.60    0.90
   6   8   9    3.40    0.60
   8  -6   9    4.60    0.60
   8  -6   9    6.20    0.80
   8  -6   9    4.60    0.70
  -6  -8   9    3.80    0.60
   8  -6   9    4.30    0.70
   8  -6   9    5.20    1.10
  -6  -8   9    4.30    0.90
   8  -7  -9    1.70    0.60
   7   8  -9    1.30    0.60
   8  -7  -9    1.40    0.70
   8  -7   9    1.40    0.60
   8  -7   9    0.60    0.50
   8  -7   9    1.60    0.60
   8  -7   9    1.70    0.50
   7   8   9    2.00    0.50
   7   8   9    2.70    0.50
   8   8  -9    5.20    0.70
   8  -8  -9    5.70    0.70
   8   8   9    5.70    0.70
   8  -8   9    6.00    0.80
   8  -8   9    5.80    0.70
   8   8   9    6.30    0.70
   8  -9  -9    0.40    0.50
   9   8  -9    0.90    0.50
   8  -9   9    0.50    0.40
   9   8   9    1.40    0.40
   9   8   9    0.00    0.40
   9   7  -9    2.10    0.60
   7  -9  -9    2.60    0.50
   7  -9  -9    1.40    0.60
   7  -9   9    2.30    0.50
   9   7   9    2.50    0.50
   9   7   9    2.60    0.50
   6  -9  -9    2.90    0.60
   6  -9  -9    3.40    0.60
   9   6  -9    2.20    0.60
   9   6   9    2.50    0.50
   9   6   9    2.40    0.50
   6  -9   9    3.20    0.60
   6  -9   9    1.60    0.50
   5  -9  -9    7.60    1.00
   9   5  -9    6.30    0.80
   5  -9  -9    6.60    0.80
   5  -9   9    6.60    0.80
   5  -9   9    7.20    0.90
   9   5   9    6.60    0.70
   5  -9   9    7.30    1.20
   9   5   9    6.80    0.80
   4  -9  -9    7.00    0.80
   9   4  -9    6.30    0.70
   4  -9  -9    6.50    0.70
   4  -9   9    5.60    1.10
   4  -9   9    7.10    0.90
   9   4   9    6.60    0.70
   4  -9   9    6.90    0.70
   9   4   9    5.30    0.70
   9   3  -9    9.80    1.00
   9   3  -9    8.70    1.50
   9   3  -9    8.90    0.90
   3  -9  -9    8.30    1.10
   3  -9  -9    9.30    0.90
   9   3   9   10.90    0.90
   9   3   9   10.70    0.90
   3  -9   9   11.10    1.30
   3  -9   9   10.10    0.90
   3  -9   9    9.10    0.90
   2  -9  -9    5.60    0.90
   9   2  -9    7.40    0.80
   2  -9  -9    7.00    0.90
   9   2  -9    8.00    0.90
   2  -9  -9    6.60    0.80
   9   2  -9    7.90    1.00
   9   2   9    6.50    0.80
   2  -9   9    7.20    1.10
   9   2   9    6.40    0.70
   2  -9   9    6.50    0.70
   2  -9   9    5.70    0.80
   9   1  -9   32.00    2.10
   1  -9  -9   37.80    1.80
   1  -9  -9   36.90    2.20
   9   1  -9   34.30    1.90
   1  -9  -9   35.20    1.80
   9   1  -9   32.80    1.80
   9   1   9   31.10    1.80
   1  -9   9   31.90    1.70
   9   1   9   32.10    1.80
   1  -9   9   34.70    2.40
   0  -9  -9   15.80    1.40
   0  -9  -9   14.90    1.10
   9   0  -9   14.80    1.30
   0  -9  -9   16.30    1.10
   9   0  -9   16.20    1.20
   9   0   9   16.40    1.10
   0  -9   9   17.50    1.50
   9   0   9   15.20    1.10
   0  -9   9   16.20    1.10
   9  -1  -9   34.40    1.90
  -1  -9  -9   32.60    1.80
  -1  -9  -9   30.60    2.20
   9  -1  -9   34.00    2.10
  -1  -9  -9   31.40    1.80
   9  -1   9   34.30    1.80
   9  -1   9   35.90    1.90
  -1  -9   9   41.40    2.50
  -1  -9   9   37.10    1.80
   9  -2  -9    5.90    0.90
   9  -2  -9    6.30    0.70
  -2  -9  -9    6.60    1.10
   9  -2   9    7.10    0.90
  -2  -9   9    6.80    0.80
  -2  -9   9    6.30    1.00
   9  -2   9    6.30    0.80
  -3  -9  -9   10.20    1.30
   9  -3  -9   10.30    1.20
   9  -3  -9    8.40    1.00
  -3  -9   9   12.10    0.90
  -3  -9   9    8.50    1.30
   9  -3   9    9.70    0.90
   9  -3   9    8.40    0.90
   9  -3   9    9.00    1.00
   9  -4  -9    6.50    1.00
  -4  -9  -9    3.40    1.00
   9  -4  -9    6.20    0.80
  -4  -9   9    6.20    0.70
   9  -4   9    7.10    0.80
   9  -4   9    5.80    0.80
  -4  -9   9    5.80    1.00
   9  -4   9    6.90    0.80
  -5  -9  -9    7.70    1.20
   9  -5  -9    7.40    1.00
   9  -5  -9    7.30    0.90
   9  -5  -9    5.90    0.70
  -5  -9   9    8.20    1.20
   5   9   9    6.40    0.80
   9  -5   9    7.10    0.80
  -5  -9   9    6.00    0.70
   9  -5   9    6.00    0.80
   9  -5   9    7.00    0.90
   9  -6  -9    3.10    0.80
  -6  -9  -9    1.70    0.90
   9  -6  -9    2.50    0.60
   9  -6   9    3.70    0.70
   9  -6   9    2.90    0.60
  -6  -9   9    2.20    0.50
   6   9   9    2.10    0.60
   9  -6   9    3.90    0.60
   7   9  -9    2.10    0.60
   9  -7  -9    1.50    0.50
  -7  -9  -9    0.80    0.80
   9  -7   9    2.40    0.50
   9  -7   9    3.40    0.60
   9  -7   9    2.40    0.60
   7   9   9    2.00    0.50
   8   9  -9    0.50    0.40
   9  -8  -9    0.80    0.40
   8   9   9    1.00    0.40
   9  -8   9    1.30    0.50
   9  -8   9    0.70    0.40
   9   9  -9    1.40    0.40
   9  -9  -9    1.70    0.40
   9   9   9    0.70    0.30
   8 -10  -9    0.70    0.40
   8 -10  -9   -0.30    0.40
  10   8  -9    0.00    0.30
  10   8   9    0.40    0.30
  10   8   9    0.60    0.30
   7 -10  -9    6.70    0.70
   7 -10  -9    4.60    0.60
  10   7  -9    4.70    0.60
  10   7   9    5.60    0.60
  10   7   9    6.00    0.70
   6 -10  -9    4.30    0.60
   6 -10  -9    4.00    0.60
  10   6  -9    4.10    0.60
  10   6   9    4.70    0.60
   6 -10   9    3.80    0.60
  10   6   9    4.10    0.50
   5 -10  -9   18.50    1.30
  10   5  -9   17.00    1.20
   5 -10  -9   19.90    1.30
  10   5   9   19.50    1.20
   5 -10   9   18.70    1.20
  10   5   9   18.60    1.20
   4 -10  -9    1.80    0.60
   4 -10  -9    1.40    0.50
  10   4  -9    2.10    0.50
   4 -10   9    0.40    0.50
  10   4   9    1.60    0.50
  10   4   9    0.60    0.40
   3 -10  -9    4.60    0.70
  10   3  -9    4.70    0.60
  10   3  -9    5.20    0.70
   3 -10   9    6.60    0.80
   3 -10   9    4.50    0.60
  10   3   9    5.90    0.70
  10   3   9    4.90    0.60
   3 -10   9    5.20    1.00
  10   2  -9    1.60    0.50
  10   2  -9    2.80    0.60
   2 -10  -9    1.70    0.60
   2 -10  -9    2.20    0.60
   2 -10   9    1.50    0.80
   2 -10   9    0.90    0.50
  10   2   9    1.80    0.50
   1 -10  -9    9.00    1.00
  10   1  -9   10.30    1.00
  10   1  -9    8.10    0.90
   1 -10  -9   10.30    1.00
  10   1  -9   10.90    1.30
  10   1   9    8.50    0.90
   1 -10   9   12.10    1.30
   1 -10   9    9.50    0.90
  10   0  -9   17.20    1.20
  10   0  -9   19.50    1.50
   0 -10  -9   17.10    1.20
   0 -10  -9   18.20    1.20
   0 -10   9   17.10    1.60
  10   0   9   17.40    1.20
   0 -10   9   16.90    1.20
  10   0   9   16.70    1.20
  -1 -10  -9   10.60    0.90
  -1 -10  -9    9.80    1.30
  10  -1  -9    8.40    1.20
  10  -1  -9    8.10    1.00
  10  -1   9    8.70    1.00
  10  -1   9    9.50    0.90
  -1 -10   9    9.10    0.90
  -1 -10   9   11.00    1.30
  -2 -10  -9    1.20    0.80
  10  -2  -9    1.80    0.60
  10  -2  -9    1.90    0.70
  -2 -10   9    2.10    0.50
  -2 -10   9    2.30    0.80
  10  -2   9    1.80    0.50
  10  -2   9    1.80    0.60
  -3 -10  -9    5.20    1.00
  10  -3  -9    5.50    0.90
  10  -3  -9    6.40    0.70
  -3 -10   9    4.10    0.60
  10  -3   9    3.90    0.70
  10  -3   9    4.90    0.60
  10  -3   9    4.80    0.60
  10  -4  -9    1.30    0.60
  10  -4  -9    0.30    0.50
  -4 -10  -9    0.60    0.80
  10  -4   9    0.50    0.50
  10  -4   9    1.10    0.50
  -4 -10   9    0.90    0.50
  10  -4   9    1.40    0.40
  10  -5  -9   17.40    1.20
  10  -5  -9   18.20    1.40
  -5 -10  -9   18.20    1.50
  -5 -10   9   17.90    1.10
  10  -5   9   18.00    1.20
  10  -5   9   18.20    1.30
   5  10   9   18.80    1.20
  10  -5   9   19.90    1.20
  10  -6  -9    4.20    0.60
  10  -6   9    3.70    0.60
   6  10   9    4.30    0.60
  10  -6   9    4.90    0.60
  10  -6   9    4.10    0.60
   7  10  -9    4.60    0.60
  10  -7  -9    6.50    0.70
  10  -7   9    4.90    0.60
   7  10   9    4.30    0.50
  10  -7   9    5.90    0.70
  10  -8  -9    0.60    0.40
   8  10  -9    0.30    0.30
   8  10   9    0.60    0.40
  10  -8   9    1.00    0.40
   7 -11  -9    0.50    0.30
  11   7  -9    0.60    0.30
   7 -11  -9    0.20    0.40
   6 -11  -9    0.60    0.40
   6 -11  -9    0.40    0.40
  11   6  -9    0.00    0.40
  11   6   9    0.10    0.30
   5 -11  -9    0.10    0.40
  11   5  -9    0.40    0.40
   5 -11  -9    0.40    0.50
   5 -11   9    0.90    0.50
  11   5   9    0.60    0.40
   4 -11  -9   -0.10    0.50
  11   4  -9    0.00    0.40
   4 -11   9    0.50    0.40
  11   4   9   -0.40    0.40
  11   3  -9   10.70    0.90
  11   3  -9    9.50    0.90
   3 -11  -9   11.80    1.00
  11   3   9    9.30    0.80
   3 -11   9    9.80    0.90
   3 -11   9   10.70    0.90
  11   2  -9    3.00    0.60
  11   2  -9    2.10    0.50
   2 -11  -9    3.00    0.60
   2 -11   9    2.40    0.50
  11   2   9    1.90    0.50
  11   1  -9    8.60    0.90
  11   1  -9    7.30    0.70
   1 -11  -9    6.40    0.70
  11   1   9    8.20    0.80
   1 -11   9    7.20    0.80
   0 -11  -9    7.70    0.90
  11   0  -9    7.40    0.90
  11   0  -9    9.10    1.20
   0 -11  -9    8.00    0.90
   0 -11   9    8.50    0.90
  11   0   9    8.40    0.80
  11  -1  -9    8.30    0.90
  11  -1  -9    8.60    1.10
  -1 -11  -9    6.90    0.80
  11  -1   9    7.20    0.80
  11  -1   9    7.00    0.80
  -1 -11   9    7.70    0.80
  11  -2  -9    2.70    0.60
  11  -2  -9    1.70    0.70
  -2 -11   9    2.30    0.50
  11  -2   9    2.50    0.50
  11  -2   9    2.40    0.60
  11  -3  -9    8.20    1.10
  11  -3  -9    9.80    0.90
  11  -3   9    9.60    0.80
  -3 -11   9    9.80    0.90
  11  -3   9    9.50    0.90
  11  -4  -9    0.10    0.50
  11  -4   9    0.60    0.40
  -4 -11   9    0.50    0.40
  11  -4   9    0.30    0.40
   4  11   9    0.20    0.40
  11  -4   9    0.30    0.50
  11  -5  -9    0.20    0.40
  11  -5   9    0.10    0.40
  11  -5   9    0.30    0.50
  11  -5   9    0.50    0.40
  -5 -11   9   -0.20    0.40
   5  11   9    0.70    0.40
   6  11  -9    0.20    0.40
  11  -6   9    0.00    0.30
   6  11   9    0.20    0.40
  11  -6   9    0.20    0.40
  11  -6   9    0.70    0.50
   7  11  -9    0.20    0.30
   7  11   9    0.10    0.30
  11  -7   9    0.60    0.30
  12   5  -9    0.90    0.40
   5 -12  -9    1.20    0.40
  12   5   9    0.70    0.30
   4 -12  -9    5.50    0.70
  12   4  -9    5.30    0.60
  12   4   9    6.00    0.60
   3 -12  -9    1.40    0.50
  12   3  -9    1.60    0.40
  12   3   9    1.30    0.40
   3 -12   9    0.70    0.40
   2 -12  -9    0.30    0.50
  12   2  -9    1.50    0.40
  12   2  -9    1.80    0.40
  12   2   9    1.30    0.40
   2 -12   9    1.30    0.50
   1 -12  -9   11.40    0.90
  12   1  -9   12.70    0.90
   1 -12   9   11.50    0.90
  12   1   9   12.70    0.90
  12   0  -9    0.90    0.50
   0 -12   9    2.30    0.50
  12   0   9    0.80    0.40
  12  -1  -9   13.70    1.00
  -1 -12   9   14.70    1.00
  12  -1   9   11.90    0.90
  12  -1   9   13.40    0.90
  12  -2  -9    1.00    0.40
  12  -2   9    0.90    0.40
  -2 -12   9    1.70    0.50
  12  -2   9    1.40    0.50
   2  12   9    1.30    0.40
  12  -3  -9    0.80    0.40
  12  -3   9    0.80    0.40
  -3 -12   9    2.10    0.40
  12  -3   9    1.00    0.40
   3  12   9    1.10    0.40
  12  -4  -9    6.40    0.70
   4  12   9    5.70    0.70
  12  -4   9    4.60    0.60
  12  -4   9    5.60    0.60
  -4 -12   9    6.60    0.60
   5  12  -9    1.30    0.40
   5  12  -9    0.50    0.40
  12  -5  -9    0.40    0.40
  12  -5   9    1.00    0.40
   5  12   9    0.90    0.30
  12  -5   9    1.10    0.30
   6  12   9    0.90    0.30
  13   2   9    0.20    0.30
  13   1  -9    3.50    0.40
  13   1   9    3.60    0.50
  13   0  -9    2.30    0.40
  13   0   9    2.40    0.40
  13  -1  -9    2.80    0.40
  13  -1   9    2.30    0.30
  13  -2  -9   -0.40    0.30
  13  -2   9    0.00    0.30
   0   0  10   -0.60    0.40
   1   0  10    6.70    0.80
   0   1  10    8.00    0.80
  -1   1  10  385.26   22.20
   1   1  10  409.86   22.30
   2   1 -10  474.65   24.30
  -1   2 -10  490.75   24.30
  -1   2  10  476.85   27.10
   2   1  10  500.95   27.30
   0   2 -10    7.20    0.90
   2   0  10    8.70    0.90
   0   2  10    7.60    0.80
   1   2 -10  538.35   25.30
   1   2  10  473.45   28.30
   2  -2 -10  555.94   25.00
   2   2  10  569.24   31.60
   2  -3 -10  310.47   13.40
   3   2 -10  330.17   15.10
  -2   3 -10  310.07   15.00
   3   2  10  257.17   16.80
   3   2  10  274.77   15.00
  -1   3 -10   44.40    2.60
   3   1 -10   47.00    2.60
   1  -3 -10   43.30    2.30
   3   1  10   42.70    2.90
   3   0 -10   19.20    1.30
   0   3 -10   19.40    1.40
   3   0  10   19.30    1.50
   1   3 -10   43.90    2.60
   3  -1 -10   45.40    2.30
   1   3  10   46.40    2.90
   3  -2 -10  265.07   13.40
   2   3 -10  279.47   15.10
   2   3  10  336.57   15.10
   2   3  10  313.47   17.00
   3   3 -10  412.66   20.50
   3  -3 -10  415.56   21.50
   3  -3 -10  419.46   18.20
   3  -3  10  391.16   21.40
   3   3  10  375.46   23.00
   3   3  10  420.76   20.50
   4   3 -10  209.98    9.80
   3  -4 -10  190.28    8.70
   3  -4 -10  173.18   10.00
   3  -4  10  187.98   10.10
   4   3  10  188.78   11.00
   4   3  10  176.38    9.70
   2  -4 -10  143.29    8.60
   2  -4 -10  155.78    7.50
  -2   4 -10  155.78    8.40
   4   2 -10  155.08    8.40
   4   2  10  167.08    8.50
   4   2  10  169.38    9.50
   2  -4  10  182.48    8.70
  -1   4 -10  212.18   10.70
   1  -4 -10  217.48    9.50
   4   1 -10  215.48   10.70
   1  -4  10  191.88   11.10
   4   1  10  202.88   12.00
   4   0 -10  508.45   26.20
   0  -4 -10  525.05   23.30
   0   4 -10  541.55   26.20
   4   0 -10  544.35   23.30
   4   0  10  498.75   29.40
   0  -4  10  519.65   27.60
   1   4 -10  216.68   10.60
  -1  -4 -10  201.08    9.30
   4  -1 -10  199.28    9.30
   2   4 -10  165.68    8.50
   4  -2 -10  166.78    7.50
   4  -2  10  156.28    8.70
   2   4  10  156.78    9.50
   2   4  10  164.88    8.40
   4  -3 -10  192.98    8.90
   4  -3 -10  182.88   10.40
   4  -3 -10  197.78    9.00
   3   4 -10  201.68   10.10
   3   4  10  196.18   10.00
   3   4  10  192.78   11.30
   4  -3  10  191.08   10.40
   4   4 -10  115.39    6.00
   4  -4 -10  103.69    6.00
   4  -4 -10  112.99    5.30
   4  -4 -10  107.99    5.20
   4  -4  10  107.69    6.00
   4   4  10  103.09    5.90
   4   4  10  109.59    6.70
   4  -5 -10   67.59    3.80
   4  -5 -10   69.59    3.50
   5   4 -10   59.89    3.90
   4  -5 -10   62.49    3.20
   4  -5  10   64.09    3.80
   5   4  10   64.59    4.40
   5   4  10   63.89    3.90
   5   3 -10  347.47   15.90
   3  -5 -10  348.27   16.00
   3  -5 -10  374.16   16.00
   3  -5 -10  364.46   18.60
   5   3 -10  346.07   17.90
   5   3  10  343.47   17.90
   5   3  10  347.17   20.10
   3  -5  10  332.37   18.60
   2  -5 -10   43.80    2.30
   5   2 -10   49.20    2.80
   2  -5 -10   44.50    2.50
   2  -5 -10   42.40    2.60
   5   2  10   48.00    3.20
   2  -5  10   40.30    2.60
   5   2  10   43.00    2.80
   1  -5 -10  145.39    6.70
   5   1 -10  136.09    7.50
  -1   5 -10  139.99    7.50
   1  -5 -10  138.99    6.70
   5   1  10  151.88    8.50
   1  -5  10  143.09    7.70
   5   0 -10  104.19    6.00
   0  -5 -10  116.39    5.40
   0   5 -10  110.19    6.00
   0  -5  10  117.09    6.20
   5   0  10  115.49    6.80
   1   5 -10  151.78    7.90
   5  -1 -10  156.38    7.00
  -1  -5 -10  153.78    7.00
   5  -1 -10  140.49    6.90
  -1  -5 -10  148.19    7.00
  -1  -5  10  150.98    8.10
   2   5 -10   48.20    2.90
   5  -2 -10   43.10    2.50
   5  -2 -10   45.30    2.40
   2   5  10   54.79    3.40
   5  -3 -10  351.96   16.20
   5  -3 -10  348.87   16.30
   3   5 -10  325.67   18.20
   5  -3  10  348.47   19.00
   3   5  10  389.96   20.60
   3   5  10  384.36   18.20
   5  -4 -10   61.19    3.60
   5  -4 -10   63.89    3.20
   5  -4 -10   65.19    3.40
   4   5 -10   57.69    3.70
   4   5  10   65.89    4.30
   5  -4  10   62.79    3.60
   4   5  10   58.49    3.70
   5   5 -10  179.18    9.40
   5  -5 -10  179.38    9.60
   5  -5 -10  178.88    8.20
   5  -5 -10  160.68    8.30
   5   5  10  171.28    9.40
   5   5  10  174.58   10.60
   5  -5  10  178.88    9.60
   6   5 -10  173.18    9.40
   5  -6 -10  176.28    8.10
   5  -6 -10  159.98    9.40
   6   5  10  172.68    9.40
   5  -6  10  177.18    9.50
   4  -6 -10   74.29    4.30
   4  -6 -10   75.59    3.80
   6   4 -10   75.69    4.50
   6   4  10   73.99    4.50
   6   4  10   76.99    5.00
   4  -6  10   73.39    4.30
   3  -6 -10   22.50    1.40
   6   3 -10   23.60    1.90
   6   3 -10   24.00    1.40
   3  -6 -10   19.00    1.50
   3  -6 -10   21.00    1.70
   6   3  10   17.40    1.80
   6   3  10   19.30    2.00
   3  -6  10   25.60    1.60
   2  -6 -10   88.29    4.20
   6   2 -10   85.89    4.80
   6   2 -10   86.69    4.10
   2  -6 -10   89.59    4.30
   6   2  10   81.29    5.40
   2  -6  10   76.69    4.70
   1  -6 -10   52.09    2.80
   1  -6 -10   53.19    2.90
   6   1 -10   57.89    3.30
   6   1 -10   57.19    2.70
   6   1  10   52.79    3.60
   1  -6  10   47.90    3.10
   0  -6 -10    4.50    0.80
   6   0 -10    5.50    0.70
   0  -6 -10    4.50    0.70
   0  -6  10    5.00    0.80
   6   0  10    5.50    1.00
  -1  -6 -10   52.19    2.80
   6  -1 -10   51.49    2.70
   1   6 -10   53.59    3.20
  -1  -6  10   54.79    3.10
   6  -2 -10   84.99    4.10
   2   6 -10   78.69    4.70
  -2  -6 -10   83.09    4.10
  -2  -6  10   83.79    4.70
   6  -3 -10   20.00    1.40
   6  -3 -10   21.80    1.60
   3   6 -10   21.50    1.90
   3   6  10   22.90    2.20
   6  -3  10   23.80    1.60
  -3  -6  10   23.00    1.60
   6  -4 -10   77.69    4.10
   6  -4 -10   79.79    3.90
   4   6 -10   75.19    4.60
   6  -4  10   78.19    4.50
   4   6  10   76.39    5.20
   6  -5 -10  177.38    8.20
   5   6 -10  173.08    9.40
   6  -5  10  184.08    9.60
   5   6  10  159.08    9.40
   6  -6 -10    2.60    0.80
   6   6 -10    1.10    0.90
   6  -6 -10    2.30    0.80
   6  -6  10    1.60    0.50
   6  -6  10    1.20    0.70
   6  -6  10    1.60    0.50
   6   6  10    2.40    1.00
  -6  -6  10    2.80    0.50
   6  -7 -10   14.20    1.20
   6  -7 -10   13.50    1.40
   7   6 -10   13.70    1.10
   6  -7 -10   13.40    1.50
   6  -7 -10   13.50    1.10
   7   6 -10   12.20    1.80
   6  -7  10   12.90    1.00
   6  -7  10   14.90    1.30
   7   6  10   13.80    1.00
   6  -7  10   14.30    1.50
   6  -7  10   13.20    1.10
   6  -7  10   15.00    1.10
   6  -7  10   17.20    1.20
   7   6  10   14.00    1.10
   6  -7  10   14.80    1.10
   7   5 -10   48.20    3.40
   5  -7 -10   43.80    2.50
   7   5 -10   43.80    2.40
   5  -7 -10   47.30    2.70
   5  -7 -10   44.00    3.00
   5  -7 -10   46.90    2.40
   5  -7  10   49.99    2.40
   5  -7  10   50.29    2.40
   5  -7  10   50.89    2.50
   5  -7  10   51.49    3.10
   7   5  10   45.40    2.30
   4  -7 -10    9.00    1.10
   7   4 -10   12.30    1.60
   4  -7 -10    7.30    1.10
   4  -7  10    8.10    1.10
   7   3 -10   44.30    2.50
   7   3 -10   44.70    3.10
   3  -7 -10   43.60    2.50
   7   2 -10   14.40    1.10
   2  -7 -10   13.00    1.30
   2  -7 -10   12.80    1.20
   7   2 -10   14.20    1.60
   2  -7  10   15.90    1.30
   1  -7 -10   31.00    2.10
   7   1 -10   33.40    2.40
   7   1 -10   37.10    2.00
   1  -7 -10   35.50    2.00
   1  -7  10   33.30    2.20
   0  -7 -10   48.00    2.60
   7   0 -10   44.70    2.50
   0  -7  10   47.50    2.90
   7  -1 -10   34.20    2.00
  -1  -7 -10   36.00    2.10
  -1  -7  10   37.70    2.30
  -2  -7 -10   13.50    1.20
   2   7 -10   10.80    1.40
   7  -2 -10   14.40    1.10
  -2  -7  10   13.30    1.20
  -3  -7 -10   43.50    2.50
   7  -3 -10   44.30    2.40
   3   7 -10   37.40    2.90
  -3  -7  10   44.20    2.70
   4   7 -10    8.70    1.40
   7  -4 -10    9.00    1.00
   7  -4  10    9.70    1.20
  -4  -7  10    7.70    1.20
  -4  -7  10    7.50    0.80
   7  -5 -10   48.90    2.60
   7  -5 -10   44.80    2.40
   5   7 -10   48.20    3.30
   7  -5  10   46.00    2.40
   7  -5  10   45.50    2.30
  -5  -7  10   50.69    3.10
  -5  -7  10   45.30    2.30
   7  -5  10   47.70    3.10
   7  -6 -10   15.30    1.30
   7  -6 -10   16.40    1.20
   6   7 -10   13.60    1.80
   7  -6  10   14.00    1.10
   7  -6  10   12.30    1.20
   7  -6  10   14.60    1.10
   7  -6  10   12.70    1.00
   7  -6  10   15.90    1.60
  -6  -7  10   13.30    1.00
   6   7  10   14.10    1.20
  -6  -7  10   14.90    1.60
   7  -6  10   12.90    1.10
   7  -6  10   14.50    1.20
   7  -7 -10    0.20    0.60
   7   7 -10    0.20    0.50
   7  -7 -10   -0.10    0.60
   7  -7  10    0.00    0.70
   7  -7  10    0.20    0.60
   7   7  10    0.20    0.50
   7  -7  10    0.40    0.50
   7  -7  10    0.50    0.50
   7  -7  10    0.20    0.50
   7   7  10    0.80    0.50
   7  -7  10    0.00    0.50
   7  -7  10   -0.40    0.40
   7  -8 -10    7.70    0.90
   7  -8 -10    7.70    0.90
   8   7 -10    6.10    0.70
   8   7  10    8.20    0.80
   7  -8  10    6.30    0.80
   7  -8  10    6.30    0.70
   7  -8  10    6.40    0.80
   8   7  10    6.70    0.70
   6  -8 -10   33.20    2.00
   6  -8 -10   33.50    1.80
   6  -8 -10   33.50    2.40
   8   6 -10   33.90    1.80
   6  -8 -10   35.60    1.90
   8   6  10   31.30    1.80
   6  -8  10   30.90    1.80
   6  -8  10   33.30    1.90
   6  -8  10   32.60    1.80
   8   6  10   27.60    1.70
   6  -8  10   32.10    1.80
   6  -8  10   30.40    2.40
   6  -8  10   30.00    1.70
   5  -8 -10   17.10    1.10
   8   5 -10   13.40    1.80
   8   5 -10   14.60    1.10
   5  -8 -10   16.00    1.50
   5  -8 -10   15.50    1.10
   5  -8 -10   14.60    1.30
   5  -8  10   14.00    1.50
   8   5  10   15.40    1.10
   5  -8  10   14.10    1.10
   5  -8  10   12.40    1.20
   8   5  10   14.10    1.00
   5  -8  10   11.60    1.10
   5  -8  10   13.90    1.20
   5  -8  10   11.70    1.10
   8   4 -10   40.60    3.10
   4  -8 -10   40.40    2.20
   4  -8 -10   38.40    2.40
   4  -8 -10   37.80    2.10
   8   4 -10   39.70    2.10
   4  -8  10   39.40    2.10
   8   4  10   38.20    2.00
   4  -8  10   40.40    2.10
   4  -8  10   41.10    2.20
   4  -8  10   42.60    2.80
   8   4  10   39.80    2.10
   4  -8  10   42.80    2.20
   4  -8  10   45.00    2.20
   3  -8 -10   74.59    3.50
   8   3 -10   75.79    4.70
   8   3 -10   73.09    3.90
   3  -8 -10   75.59    3.90
   8   3 -10   65.49    3.50
   3  -8  10   77.69    3.50
   3  -8  10   83.29    4.50
   3  -8  10   75.19    3.40
   8   3  10   76.89    3.50
   8   2 -10    4.90    1.20
   2  -8 -10    9.10    0.90
   2  -8 -10    8.50    1.00
   8   2 -10    7.50    1.00
   2  -8  10    6.20    0.80
   2  -8  10    6.50    1.00
   1  -8 -10   18.50    1.10
   8   1 -10   18.10    1.40
   1  -8 -10   17.10    1.40
   1  -8  10   20.20    1.10
   1  -8  10   17.10    1.50
   8   0 -10  188.38    8.70
   0  -8 -10  178.88    8.70
   0  -8 -10  193.78    8.10
   0  -8  10  184.18   10.10
   0  -8  10  179.68    8.10
   8  -1 -10   21.30    1.40
  -1  -8 -10   17.20    1.50
  -1  -8  10   18.60    1.10
  -1  -8  10   17.20    1.50
   8  -2 -10    9.30    1.00
  -2  -8 -10    5.80    1.00
  -2  -8  10    8.50    1.10
  -2  -8  10    7.10    0.80
   8  -3 -10   75.09    3.80
  -3  -8 -10   76.59    4.00
  -3  -8  10   75.09    4.40
   8  -3  10   73.09    3.50
  -3  -8  10   74.79    3.50
   8  -4 -10   40.20    2.20
   4   8 -10   39.30    3.00
   8  -4 -10   40.30    2.20
  -4  -8 -10   41.60    2.50
   8  -4 -10   43.60    2.50
   8  -4  10   43.30    2.10
  -4  -8  10   40.40    2.10
   8  -4  10   45.10    2.30
  -4  -8  10   45.60    2.80
   8  -4  10   40.30    2.20
   8  -5 -10   15.70    1.10
  -5  -8 -10   11.60    1.50
   8  -5 -10   15.20    1.30
   5   8 -10   16.60    1.90
   5   8  10   14.80    1.20
  -5  -8  10   15.80    1.50
   8  -5  10   13.80    1.00
   8  -5  10   14.20    1.10
  -5  -8  10   15.10    1.10
   8  -5  10   15.60    1.20
   8  -5  10   13.50    1.10
   8  -6 -10   30.00    2.00
   8  -6 -10   30.70    1.80
   8  -6  10   28.80    2.30
   8  -6  10   33.80    1.80
  -6  -8  10   29.70    1.70
   8  -6  10   32.10    1.80
   8  -6  10   32.70    1.90
  -6  -8  10   36.40    2.40
   8  -6  10   32.80    1.80
   6   8  10   32.00    1.80
   8  -6  10   30.70    1.70
   7   8 -10    7.50    0.90
   8  -7 -10    5.80    0.70
   8  -7 -10    6.00    0.90
   7   8  10    6.90    0.70
   8  -7  10    6.20    0.70
   8  -7  10    7.60    0.90
   8  -7  10    5.70    0.80
   8  -8 -10    0.60    0.50
   8   8 -10    0.50    0.50
   8  -8  10   -0.20    0.50
   8  -8  10   -0.10    0.50
   8   8  10    0.10    0.50
   9   8 -10    4.30    0.60
   8  -9 -10    4.50    0.60
   9   8  10    4.30    0.50
   8  -9  10    3.60    0.50
   9   7 -10    0.20    0.50
   7  -9 -10    0.60    0.50
   7  -9 -10   -0.40    0.50
   7  -9  10    0.20    0.50
   9   7  10    0.00    0.40
   9   7  10    0.00    0.40
   9   6 -10    6.10    0.70
   6  -9 -10    6.30    0.80
   6  -9 -10    6.00    0.70
   9   6  10    7.40    0.90
   9   6  10    6.20    0.60
   6  -9  10    6.60    0.70
   6  -9  10    5.50    0.70
   9   5 -10   25.80    1.60
   5  -9 -10   26.10    1.60
   5  -9 -10   27.60    1.70
   5  -9  10   29.20    1.60
   5  -9  10   27.00    1.60
   9   5  10   27.90    1.60
   9   5  10   27.20    1.50
   5  -9  10   29.60    2.20
   4  -9 -10    8.90    1.10
   9   4 -10   10.90    1.00
   4  -9 -10    8.70    1.00
   4  -9 -10    8.60    1.00
   9   4  10    9.70    0.90
   9   4  10    9.60    0.90
   4  -9  10    8.80    1.20
   4  -9  10    8.50    0.90
   3  -9 -10   -0.30    0.60
   3  -9 -10    0.50    0.50
   9   3 -10    0.90    0.50
   9   3 -10    1.30    0.50
   9   3 -10    0.40    0.80
   9   3  10    1.40    0.50
   9   3  10    0.30    0.50
   3  -9  10    0.00    0.40
   3  -9  10    0.60    0.70
   3  -9  10    0.60    0.50
   2  -9 -10    1.30    0.70
   2  -9 -10    1.80    0.50
   9   2 -10    0.60    0.50
   9   2 -10    0.60    0.50
   9   2 -10    0.50    0.70
   2  -9 -10    1.20    0.60
   9   2  10    1.10    0.50
   2  -9  10    0.80    0.70
   2  -9  10    1.30    0.50
   2  -9  10    1.30    0.50
   9   2  10    0.50    0.40
   1  -9 -10   79.99    4.10
   1  -9 -10   79.79    3.70
   1  -9 -10   82.59    3.70
   9   1 -10   78.09    4.10
   9   1 -10   79.19    3.80
   1  -9  10   85.09    4.80
   9   1  10   78.89    3.70
   9   1  10   79.99    3.70
   1  -9  10   77.19    3.70
   0  -9 -10    4.70    0.60
   0  -9 -10    4.20    0.60
   0  -9 -10    4.10    0.90
   9   0 -10    4.40    0.60
   9   0 -10    4.10    0.80
   0  -9  10    4.60    0.60
   9   0  10    3.10    0.50
   9   0  10    4.00    0.60
   0  -9  10    2.70    0.80
  -1  -9 -10   72.69    4.10
   9  -1 -10   77.79    4.00
   9  -1 -10   81.99    3.70
  -1  -9 -10   75.59    3.60
  -1  -9 -10   75.19    3.60
   9  -1  10   73.89    3.60
  -1  -9  10   83.99    3.60
  -1  -9  10   85.09    4.70
   9  -1  10   78.79    3.70
   9  -1  10   76.69    3.60
  -2  -9 -10    0.50    0.80
   9  -2 -10    1.10    0.50
   9  -2 -10    1.30    0.70
  -2  -9  10    0.30    0.50
   9  -2  10    1.30    0.50
   9  -2  10    0.40    0.40
   9  -2  10    0.30    0.50
  -2  -9  10    1.40    0.70
  -3  -9 -10    0.70    0.80
   9  -3 -10    0.30    0.50
   9  -3 -10    0.70    0.60
   9  -3  10    0.50    0.40
   9  -3  10    1.10    0.50
  -3  -9  10    1.60    0.70
   9  -3  10    1.00    0.50
  -3  -9  10    1.10    0.50
   9  -4 -10   10.30    1.20
  -4  -9 -10    9.40    1.30
   9  -4 -10    9.40    1.00
   9  -4 -10    7.90    0.90
   9  -4  10    8.20    0.90
   9  -4  10    8.10    0.90
  -4  -9  10   10.80    1.30
  -4  -9  10    9.50    0.90
   9  -4  10    9.00    1.00
  -5  -9 -10   29.90    2.10
   9  -5 -10   29.20    1.70
   9  -5 -10   28.10    1.60
   9  -5 -10   29.60    1.90
  -5  -9  10   28.60    1.60
   9  -5  10   30.00    1.60
   9  -5  10   26.50    1.60
   9  -5  10   28.30    1.70
  -5  -9  10   26.60    2.10
   5   9  10   27.30    1.60
  -6  -9 -10    5.70    1.10
   9  -6 -10    7.00    0.90
   9  -6 -10    5.80    0.90
   9  -6  10    6.20    0.70
  -6  -9  10    5.20    0.60
   9  -6  10    5.90    0.80
   6   9  10    6.70    0.70
   9  -6  10    4.60    0.60
   7   9 -10    0.10    0.50
   9  -7 -10    0.20    0.50
   9  -7  10    0.00    0.50
   9  -7  10    0.10    0.60
   9  -7  10    0.20    0.40
   7   9  10    0.00    0.40
   8   9 -10    3.80    0.50
   9  -8 -10    4.00    0.60
   9  -8  10    4.60    0.60
   9  -8  10    4.20    0.60
   8   9  10    3.90    0.50
   9  -9 -10   -0.10    0.40
   9   9 -10    0.30    0.40
   9   9  10    0.20    0.30
   8 -10 -10    0.80    0.40
  10   8 -10    0.90    0.40
  10   8  10    0.70    0.30
   7 -10 -10    0.60    0.40
  10   7 -10    0.40    0.40
   7 -10 -10   -0.10    0.40
  10   7  10    0.80    0.40
  10   7  10    0.50    0.40
   6 -10 -10    4.00    0.60
  10   6 -10    4.10    0.60
   6 -10 -10    3.20    0.60
  10   6  10    3.40    0.50
  10   6  10    3.40    0.50
  10   5 -10    3.70    0.60
   5 -10 -10    3.50    0.60
   5 -10 -10    4.40    0.70
  10   5  10    3.30    0.50
  10   5  10    3.40    0.50
   5 -10  10    3.50    0.60
  10   4 -10   14.50    1.10
   4 -10 -10   15.20    1.20
   4 -10 -10   17.20    1.20
  10   4  10   13.20    1.00
  10   4  10   14.60    1.00
   4 -10  10   13.80    1.10
  10   3 -10   11.50    1.00
   3 -10 -10   13.40    1.10
  10   3 -10   14.30    1.10
   3 -10  10   16.00    1.10
  10   3  10   15.30    1.00
   3 -10  10   15.20    1.10
  10   3  10   14.90    1.00
  10   2 -10   45.50    2.40
   2 -10 -10   44.90    2.30
  10   2 -10   43.50    2.20
   2 -10  10   47.90    3.10
  10   2  10   47.70    2.30
   2 -10  10   47.10    2.30
  10   2  10   45.70    2.30
  10   1 -10    4.50    0.70
  10   1 -10    3.10    0.90
   1 -10 -10    4.90    0.70
   1 -10 -10    5.50    0.70
   1 -10  10    4.90    1.00
  10   1  10    6.00    0.70
   1 -10  10    5.30    0.60
  10   1  10    5.80    0.60
   0 -10 -10   37.90    2.00
  10   0 -10   42.40    2.10
  10   0 -10   41.60    2.40
   0 -10 -10   38.60    2.10
   0 -10 -10   36.40    2.40
   0 -10  10   40.40    2.00
   0 -10  10   40.90    2.70
  10   0  10   40.00    2.00
  -1 -10 -10    6.40    1.00
  10  -1 -10    5.10    0.90
  10  -1 -10    5.80    0.70
  -1 -10 -10    5.30    0.70
  10  -1  10    4.80    0.70
  -1 -10  10    5.40    0.70
  -1 -10  10    4.90    1.00
  10  -1  10    4.10    0.60
  -2 -10 -10   46.10    2.70
  10  -2 -10   45.50    2.60
  10  -2 -10   45.20    2.30
  -2 -10  10   45.90    2.90
  10  -2  10   45.30    2.20
  -2 -10  10   43.20    2.20
  10  -2  10   42.10    2.30
  10  -3 -10   14.70    1.10
  10  -3 -10   14.10    1.30
  -3 -10 -10   14.80    1.40
  -3 -10  10   14.70    1.00
  10  -3  10   12.00    1.00
  10  -3  10   12.20    1.10
  10  -3  10   13.50    1.00
  -4 -10 -10   11.50    1.40
  10  -4 -10   14.30    1.30
  10  -4 -10   13.60    1.10
  -4 -10  10   14.30    1.00
  10  -4  10   15.00    1.00
  10  -4  10   15.00    1.10
  10  -4  10   15.00    1.20
   4  10  10   14.40    1.20
  -5 -10 -10    5.30    1.00
  10  -5 -10    4.00    0.60
  10  -5 -10    2.60    0.70
  10  -5  10    4.00    0.60
  10  -5  10    4.00    0.70
  -5 -10  10    4.30    0.60
  10  -5  10    4.20    0.60
   5  10  10    4.30    0.60
  10  -6 -10    3.80    0.60
   6  10  10    3.80    0.60
  10  -6  10    3.50    0.60
  10  -6  10    3.50    0.50
  -6 -10  10    3.60    0.50
  10  -6  10    3.70    0.50
   7  10 -10    0.50    0.50
  10  -7 -10    0.90    0.40
  10  -7  10    0.40    0.40
  10  -7  10    0.40    0.40
   7  10  10    0.80    0.40
   8  10 -10    1.20    0.40
  10  -8 -10    0.80    0.40
  10  -8  10    1.00    0.50
   8  10  10    0.70    0.40
   7 -11 -10    0.70    0.40
  11   7  10    0.90    0.30
   6 -11 -10    1.10    0.50
   6 -11 -10    1.60    0.40
  11   6 -10    1.30    0.40
  11   6  10    1.40    0.40
  11   6  10    1.30    0.30
   5 -11 -10    2.80    0.60
  11   5 -10    2.80    0.50
   5 -11 -10    3.10    0.50
  11   5  10    3.70    0.50
  11   5  10    2.90    0.40
  11   4 -10    4.20    0.50
   4 -11 -10    3.20    0.60
  11   4  10    3.60    0.50
  11   4  10    4.10    0.50
   4 -11  10    3.80    0.60
  11   3 -10    1.90    0.50
  11   3 -10    1.60    0.50
   3 -11 -10    1.70    0.50
   3 -11  10    1.10    0.50
   3 -11  10    1.20    0.50
  11   3  10    1.10    0.40
  11   2 -10   12.60    1.00
  11   2 -10   12.00    0.90
   2 -11 -10   12.50    1.00
   2 -11  10   15.20    1.00
  11   2  10   14.60    1.00
   1 -11 -10    7.60    0.90
  11   1 -10    8.50    0.90
   1 -11  10    8.60    0.90
  11   1  10    7.80    0.80
  11   0 -10   -1.00    0.40
   0 -11 -10    0.00    0.50
  11   0 -10    1.00    0.70
   0 -11  10    0.20    0.40
  11   0  10    0.10    0.40
  -1 -11 -10    6.90    0.90
  11  -1 -10    8.90    1.10
  11  -1 -10    8.40    1.00
  -1 -11  10    9.40    0.90
  11  -1  10    8.50    0.90
  11  -1  10    8.40    0.80
  11  -2 -10   12.40    1.10
  11  -2 -10   15.10    1.30
  11  -2  10   13.50    1.00
  11  -2  10   12.00    1.10
  -2 -11  10   15.80    1.00
  11  -3 -10    1.80    0.70
  11  -3 -10    0.50    0.50
   3  11  10    1.80    0.50
  -3 -11  10    1.10    0.50
  11  -3  10    1.70    0.50
  11  -3  10    1.20    0.40
  11  -4 -10    2.80    0.60
   4  11  10    4.70    0.60
  -4 -11  10    4.50    0.60
  11  -4  10    3.80    0.60
  11  -4  10    4.10    0.50
  11  -4  10    4.30    0.50
  11  -5 -10    3.50    0.60
   5  11  10    2.20    0.50
  11  -5  10    2.30    0.50
  11  -5  10    2.90    0.50
  11  -5  10    2.50    0.50
  -5 -11  10    2.90    0.50
   6  11 -10    1.20    0.40
   6  11  10    1.10    0.40
  11  -6  10    1.80    0.40
  11  -6  10    1.60    0.40
  11  -6  10    3.50    0.60
   7  11 -10    0.70    0.30
  11  -7  10    0.90    0.30
   7  11  10    0.50    0.30
   5 -12 -10    3.30    0.50
  12   4 -10    5.30    0.60
   4 -12 -10    5.50    0.70
  12   4  10    6.00    0.50
  12   3 -10    1.50    0.40
  12   3 -10    2.30    0.40
   3 -12 -10    1.00    0.40
   3 -12  10    1.30    0.40
  12   3  10    1.00    0.40
  12   2 -10    1.50    0.40
   2 -12 -10    0.40    0.40
  12   2  10    1.00    0.40
   2 -12  10    1.10    0.40
   1 -12 -10    0.40    0.40
  12   1 -10    0.30    0.40
   1 -12  10    0.20    0.40
  12   1  10    0.60    0.40
  12   0 -10   17.70    1.10
   0 -12  10   16.20    1.10
  12   0  10   16.10    1.00
  12  -1 -10    0.60    0.40
  12  -1  10    0.00    0.40
  -1 -12  10    0.60    0.40
  12  -1  10    0.20    0.40
  12  -2 -10    1.20    0.40
  12  -2  10    1.00    0.40
  -2 -12  10    1.50    0.40
   2  12  10    1.20    0.40
  12  -2  10    0.20    0.40
  12  -3 -10    1.20    0.40
  12  -3  10    1.90    0.40
   3  12  10    1.50    0.40
  12  -3  10    1.20    0.50
  -3 -12  10    2.10    0.40
  12  -4 -10    6.60    0.70
  -4 -12  10    6.10    0.60
  12  -4  10    6.80    0.60
  12  -4  10    5.80    0.70
   4  12  10    7.10    0.70
   5  12 -10    2.60    0.40
   5  12 -10    3.20    0.40
  12  -5 -10    2.50    0.50
  12  -5  10    7.00    0.70
  12  -5  10    3.00    0.40
   5  12  10    3.20    0.40
  13   1 -10    2.50    0.40
  13   1  10    2.20    0.30
  13   0 -10    2.00    0.40
  13   0  10    2.50    0.40
  13  -1 -10    4.70    0.60
  13  -1  10    2.40    0.40
  13  -2 -10    1.40    0.40
   0   0  11    1.40    0.40
   1   0  11   87.19    5.30
   0   1  11   92.69    5.30
   1   1  11  391.06   21.60
  -1   1  11  376.16   21.40
  -1   2 -11  233.48   11.80
   2   1 -11  232.58   11.80
  -1   2  11  224.38   13.10
   2   1  11  237.88   13.20
   0   2 -11   33.70    2.10
   0   2  11   39.40    2.30
   2   0  11   32.70    2.30
   1   2 -11  231.98   11.90
   1   2  11  235.48   13.30
   2  -2 -11  180.88    8.60
   2   2 -11  195.28    9.70
  -2   3 -11  390.16   19.50
   3   2 -11  387.16   19.50
   2  -3 -11  390.96   17.40
   3   2  11  377.56   21.90
  -1   3 -11  115.09    5.80
   1  -3 -11  110.09    5.20
   3   1 -11  120.29    5.80
   3   1  11  102.99    6.50
  -1   3  11  102.59    6.40
   0   3 -11   81.59    4.60
   3   0 -11   83.19    4.50
   0   3  11   95.89    5.10
   3   0  11   78.79    5.10
   3  -1 -11   96.89    4.90
   1   3 -11   99.89    5.60
   1   3  11  119.59    6.30
   2   3 -11  394.06   19.70
   2   3  11  384.66   22.00
   3   3 -11  272.97   13.90
   3  -3 -11  272.07   12.40
   3  -3 -11  268.37   14.50
   3   3  11  269.07   15.60
   3   3  11  274.57   13.90
   3  -3  11  274.57   14.40
   3  -4 -11  399.16   17.10
   3  -4 -11  382.96   17.10
   4   3 -11  382.86   19.20
  -3   4 -11  356.96   19.10
   3  -4 -11  378.26   20.00
   3  -4  11  365.56   20.00
   4   3  11  374.46   19.10
   4   3  11  375.26   21.50
  -2   4 -11 1152.98   58.89
   2  -4 -11 1177.18   62.19
   4   2 -11 1224.48   58.99
   2  -4 -11 1253.27   52.49
   4   2  11 1176.18   66.09
   2  -4  11 1119.09   62.19
   1  -4 -11  192.98    8.80
  -1   4 -11  182.78    9.80
   4   1 -11  181.18    9.80
   1  -4  11  193.98   10.20
   4   1  11  199.78   11.10
   4   0 -11  666.73   29.10
   0   4 -11  676.13   32.90
   4   0 -11  637.24   32.80
   0  -4 -11  664.53   29.20
   0  -4  11  663.03   34.60
   4   0  11  628.64   36.80
   1   4 -11  206.28   10.20
  -1  -4 -11  200.68    9.00
   4  -1 -11  196.98    9.00
   1   4  11  184.78   11.40
   4  -2 -11 1051.59   48.80
   2   4 -11 1115.79   54.89
   2   4  11 1137.79   61.59
   4  -3 -11  361.26   20.10
   4  -3 -11  380.26   17.20
   3   4 -11  368.76   19.30
   4  -3 -11  385.06   17.10
   3   4  11  413.26   21.70
   3   4  11  391.26   19.20
   4  -3  11  357.06   20.10
   4  -4 -11   13.20    1.20
   4  -4 -11   12.40    1.10
   4  -4 -11   13.30    1.20
   4   4 -11   15.30    1.50
   4   4  11   12.90    1.60
   4  -4  11   15.20    1.20
   4   4  11   14.40    1.40
   4  -5 -11   22.80    1.40
   4  -5 -11   22.40    1.60
   4  -5 -11   24.40    1.60
   5   4 -11   20.10    1.80
   5   4  11   20.30    1.80
   4  -5  11   21.20    1.60
   5   4  11   19.80    2.00
   3  -5 -11   17.30    1.30
   5   3 -11   13.80    1.50
   3  -5 -11   16.00    1.20
   3  -5 -11   16.00    1.30
   5   3  11   17.10    1.70
   3  -5  11   17.20    1.30
   5   3  11   17.10    1.60
   5   2 -11   98.49    5.50
   2  -5 -11   99.99    4.90
   5   2 -11   98.99    4.80
   2  -5 -11   92.39    4.80
   5   2  11  106.89    6.20
   2  -5  11  103.59    5.50
   5   1 -11  258.87   13.20
  -1   5 -11  260.27   13.20
   1  -5 -11  273.27   11.80
   1  -5 -11  267.87   11.80
   1  -5  11  233.18   13.70
   5   1  11  255.77   14.80
   0  -5 -11  187.28    8.30
   0   5 -11  181.28    9.30
   0  -5 -11  182.58    8.30
   5   0 -11  161.38    9.20
   0  -5  11  178.58    9.60
   5   0  11  177.18   10.40
  -1  -5 -11  250.27   11.70
   1   5 -11  261.67   13.20
   5  -1 -11  241.88   11.70
  -1  -5 -11  253.27   11.80
   5  -1 -11  237.68   11.60
  -1  -5  11  293.77   13.70
   5  -2 -11  105.19    5.00
   2   5 -11  110.19    5.80
   5  -2 -11  101.29    5.00
   2   5  11  102.59    6.50
   3   5 -11   16.30    1.60
   5  -3 -11   17.00    1.40
   5  -3 -11   18.50    1.20
   5  -3  11   15.60    1.30
   3   5  11   15.60    1.50
   3   5  11   16.70    1.80
   4   5 -11   18.20    1.80
   5  -4 -11   19.60    1.40
   5  -4 -11   21.90    1.60
   4   5  11   23.90    1.90
   4   5  11   24.70    2.20
   5  -4  11   22.60    1.60
   5  -5 -11  168.28    9.10
   5  -5 -11  176.68    7.80
   5   5 -11  162.48    8.90
   5  -5  11  159.38    9.00
   5   5  11  159.68    8.90
   5   5  11  163.18   10.10
   5  -6 -11   36.60    2.50
   5  -6 -11   37.90    2.30
   6   5 -11   41.90    2.90
   5  -6  11   39.10    2.50
   6   5  11   38.00    2.80
  -6  -5  11   37.60    2.00
   4  -6 -11   45.30    2.40
   4  -6 -11   43.50    2.70
   6   4 -11   44.40    3.00
   4  -6  11   43.30    2.70
   6   4  11   38.70    2.90
   6   4  11   43.50    3.30
   6   3 -11   92.29    5.30
   3  -6 -11   92.99    5.20
   6   3 -11   91.29    4.50
   3  -6 -11   97.29    4.60
   3  -6 -11   87.29    4.70
   3  -6  11   87.59    5.20
   6   3  11   97.19    6.00
   2  -6 -11   66.09    3.40
   6   2 -11   66.09    4.00
   2  -6 -11   69.69    3.60
   6   2 -11   61.29    3.30
   6   2  11   71.49    4.40
   2  -6  11   67.29    3.80
   6   1 -11  149.99    7.70
   1  -6 -11  141.79    6.80
   6   1 -11  148.79    6.80
   1  -6 -11  143.89    6.90
   6   1  11  142.69    8.60
   1  -6  11  141.19    7.90
   0   6 -11   19.60    1.60
   0  -6 -11   18.70    1.30
   6   0 -11   17.70    1.20
   0  -6 -11   17.40    1.40
   6   0  11   17.60    1.70
   0  -6  11   18.50    1.40
   6  -1 -11  145.09    6.90
  -1  -6 -11  147.99    6.90
   1   6 -11  151.78    7.80
  -1  -6  11  141.49    8.00
   2   6 -11   67.09    4.10
   6  -2 -11   71.89    3.50
  -2  -6 -11   75.99    3.60
   2   6  11   66.19    4.60
  -2  -6  11   66.49    4.00
   3   6 -11   92.99    5.20
   6  -3 -11   93.89    4.50
   6  -3 -11   92.89    4.60
  -3  -6  11   85.09    5.10
   3   6  11   90.49    5.90
   6  -4 -11   42.10    2.40
   4   6 -11   38.40    2.90
   4   6  11   43.90    3.40
   6  -4  11   45.60    2.70
   5   6 -11   38.50    2.90
   6  -5 -11   39.20    2.30
   6  -5  11   45.10    2.70
  -5  -6  11   39.40    2.00
   5   6  11   34.90    2.80
   6   6 -11   42.30    3.00
   6  -6 -11   36.00    2.10
   6  -6 -11   37.00    2.30
   6  -6  11   37.70    2.00
   6  -6  11   38.90    1.90
  -6  -6  11   36.80    1.90
   6  -6  11   37.00    2.60
   6  -7 -11   54.09    2.90
   6  -7 -11   55.69    2.70
   7   6 -11   51.69    2.80
   6  -7 -11   55.09    3.10
   7   6 -11   60.19    4.00
   6  -7  11   58.49    3.60
   7   6  11   59.39    2.80
   6  -7  11   56.69    2.70
   6  -7  11   59.79    2.80
   6  -7  11   56.09    2.90
   6  -7  11   57.09    2.90
   6  -7  11   59.49    2.90
   6  -7  11   57.89    2.70
   7   5 -11   31.20    1.70
   5  -7 -11   27.60    2.10
   5  -7 -11   29.40    1.90
   5  -7 -11   28.80    1.70
   7   5 -11   30.60    2.50
   5  -7 -11   28.80    1.60
   5  -7  11   29.20    2.20
   5  -7  11   29.00    1.60
   5  -7  11   29.80    1.60
   5  -7  11   27.90    1.70
   4  -7 -11  107.39    6.10
   4  -7 -11  109.99    5.30
   7   4 -11  108.69    6.30
   4  -7  11  107.29    6.20
   7   3 -11   98.99    5.50
   3  -7 -11   94.59    4.70
   7   3 -11   92.19    4.60
   3  -7  11   92.89    5.40
   7   2 -11   47.20    2.40
   7   2 -11   49.20    3.00
   2  -7 -11   44.00    2.50
   2  -7  11   45.40    2.80
   7   2  11   38.40    3.20
   1  -7 -11  113.09    5.40
   7   1 -11  111.29    5.30
   1  -7 -11  105.79    5.50
   1  -7  11  110.39    6.20
   0  -7 -11   27.60    1.70
   7   0 -11   27.90    1.70
   0  -7  11   26.40    1.90
  -1  -7 -11  118.59    5.70
   7  -1 -11  117.49    5.60
  -1  -7  11  114.79    6.50
  -2  -7 -11   44.40    2.50
   7  -2 -11   42.70    2.40
   2   7 -11   41.10    2.90
  -2  -7  11   43.60    2.70
   2   7  11   45.60    3.40
   7  -3 -11   96.79    4.60
  -3  -7 -11   92.49    4.60
   3   7 -11   86.89    5.30
  -3  -7  11   88.49    5.20
   4   7 -11  104.69    6.20
   7  -4 -11  105.19    5.30
  -4  -7  11  116.19    6.20
  -4  -7  11  105.29    4.80
   7  -5 -11   26.00    1.60
   5   7 -11   28.80    2.50
   7  -5 -11   25.30    1.90
   7  -5  11   30.10    1.60
  -5  -7  11   26.90    1.50
  -5  -7  11   31.50    2.20
   7  -5  11   30.70    1.70
   7  -5  11   31.30    2.20
   7  -6 -11   55.59    2.90
   7  -6 -11   55.79    3.10
   6   7 -11   56.59    3.80
   6   7  11   52.79    2.80
   7  -6  11   56.19    2.90
   7  -6  11   55.79    2.70
   7  -6  11   56.89    2.80
   7  -6  11   57.29    2.80
   7  -6  11   56.29    3.60
  -6  -7  11   62.89    3.60
  -6  -7  11   57.89    2.70
   7  -6  11   53.79    2.70
   7  -7 -11   21.10    1.70
   7  -7 -11   22.60    1.50
   7   7 -11   21.30    1.40
  -7  -7  11   20.60    1.90
   7  -7  11   23.20    1.30
   7  -7  11   22.00    1.40
   7  -7  11   20.70    1.40
   7  -7  11   22.00    1.90
   7   7  11   22.00    1.40
   7  -7  11   22.90    1.50
   7  -7  11   21.80    1.50
   8   7 -11    7.00    0.80
   7  -8 -11    7.50    1.00
   7  -8 -11    8.00    0.90
   7  -8 -11    8.90    1.10
   7  -8  11    7.50    0.90
   7  -8  11    6.40    0.70
   8   7  11    8.10    0.90
   7  -8  11    6.60    0.80
   6  -8 -11   34.90    1.90
   8   6 -11   33.30    1.90
   6  -8 -11   35.00    2.00
   6  -8 -11   34.50    2.20
   6  -8  11   35.50    1.90
   6  -8  11   36.60    2.00
   6  -8  11   35.80    1.90
   8   6  11   39.50    1.90
   8   6  11   35.80    1.80
   6  -8  11   36.80    1.90
   6  -8  11   34.60    2.50
   8   5 -11   16.90    1.20
   8   5 -11   16.20    2.00
   5  -8 -11   18.10    1.20
   5  -8 -11   17.40    1.40
   5  -8 -11   16.40    1.30
   5  -8  11   17.60    1.20
   5  -8  11   16.00    1.20
   5  -8  11   15.80    1.20
   5  -8  11   18.50    1.30
   8   5  11   17.60    1.20
   8   5  11   16.50    1.20
   5  -8  11   17.30    1.60
   8   4 -11    2.80    0.60
   4  -8 -11    2.70    0.60
   8   4 -11    3.30    0.60
   8   4 -11    1.90    1.00
   4  -8 -11    2.80    0.80
   4  -8 -11    3.60    0.70
   4  -8  11    4.60    0.60
   4  -8  11    3.70    0.70
   4  -8  11    2.60    0.60
   8   4  11    3.40    0.60
   4  -8  11    2.20    0.80
   4  -8  11    3.80    0.60
   8   4  11    3.40    0.50
   8   3 -11    1.10    0.90
   8   3 -11    3.20    0.80
   3  -8 -11    2.90    0.80
   8   3 -11    2.10    0.60
   3  -8 -11    1.50    0.50
   3  -8  11    3.70    0.90
   8   3  11    3.30    0.50
   3  -8  11    3.90    0.60
   8   2 -11   62.19    4.00
   2  -8 -11   61.69    3.00
   2  -8 -11   64.39    3.40
   2  -8 -11   66.39    3.00
   8   2 -11   61.79    3.30
   2  -8  11   64.19    3.80
   2  -8  11   58.59    2.90
   8   1 -11    4.10    0.80
   1  -8 -11    4.00    0.60
   1  -8 -11    4.80    0.90
   1  -8  11    5.10    0.90
   1  -8  11    5.90    0.60
   0  -8 -11    6.60    0.80
   8   0 -11    5.40    0.80
   0  -8 -11    7.70    1.00
   0  -8  11    5.90    0.70
   0  -8  11    4.70    0.90
   8  -1 -11    4.60    0.80
  -1  -8 -11    7.10    1.00
  -1  -8  11    4.50    0.90
  -1  -8  11    5.20    0.60
   8  -2 -11   58.69    3.30
  -2  -8 -11   62.69    3.30
  -2  -8  11   63.89    3.80
  -2  -8  11   64.89    2.90
   8  -2  11   58.59    2.90
   8  -3 -11    3.00    0.70
  -3  -8 -11    2.10    0.80
  -3  -8  11    2.10    0.50
   8  -3  11    2.50    0.60
   8  -3  11    2.60    0.60
  -3  -8  11    2.00    0.80
   8  -4 -11    3.80    0.80
   8  -4 -11    1.80    0.60
   4   8 -11    3.30    1.10
   8  -4 -11    3.70    0.60
  -4  -8 -11    1.60    0.90
  -4  -8  11    4.90    1.00
   8  -4  11    3.70    0.70
   8  -4  11    3.10    0.60
  -4  -8  11    3.20    0.60
   8  -4  11    2.10    0.50
   8  -4  11    2.20    0.50
  -5  -8 -11   13.30    1.50
   8  -5 -11   17.10    1.40
   8  -5 -11   16.60    1.20
   5   8 -11   20.10    2.00
  -5  -8  11   18.70    1.70
   8  -5  11   15.40    1.10
   5   8  11   14.90    1.20
  -5  -8  11   19.30    1.20
   8  -5  11   15.10    1.10
   8  -5  11   15.60    1.20
   8  -5  11   15.50    1.20
   8  -6 -11   36.80    2.00
   8  -6 -11   38.10    2.20
  -6  -8 -11   41.60    2.40
   8  -6  11   32.00    1.80
   8  -6  11   33.10    2.00
   8  -6  11   35.80    1.90
   6   8  11   36.90    1.90
   8  -6  11   35.10    1.90
  -6  -8  11   35.90    2.50
  -6  -8  11   33.80    1.80
   8  -7 -11    6.80    0.80
   7   8 -11    6.50    0.80
   8  -7 -11    7.40    1.00
   8  -7  11    7.90    0.90
   8  -7  11    6.90    0.90
   7   8  11    7.30    0.90
   8  -7  11    7.40    0.90
   8  -7  11    7.70    0.80
   8   8 -11    6.90    0.80
  -8  -8 -11    5.60    1.00
   8  -8 -11    7.00    0.90
   8  -8  11    9.90    0.90
   8  -8  11    5.40    0.70
   8   8  11    7.00    0.80
   8  -8  11    5.60    0.70
   9   8 -11    1.30    0.50
   8  -9 -11    1.30    0.50
   8  -9  11    1.60    0.50
   9   8  11    1.70    0.40
   7  -9 -11    1.30    0.50
   9   7 -11    1.80    0.50
   7  -9 -11    2.20    0.50
   7  -9  11    2.00    0.50
   9   7  11    2.00    0.40
   9   7  11    2.60    0.50
   6  -9 -11    2.50    0.60
   6  -9 -11    1.90    0.60
   9   6 -11    1.90    0.60
   9   6  11    2.70    0.50
   9   6  11    3.50    0.60
   6  -9  11    3.10    0.60
   6  -9  11    3.10    0.60
   5  -9 -11   17.90    1.50
   9   5 -11   20.90    1.30
   5  -9 -11   18.90    1.30
   5  -9 -11   20.20    1.30
   5  -9  11   18.00    1.80
   5  -9  11   16.20    1.20
   9   5  11   15.90    1.10
   9   5  11   16.30    1.20
   5  -9  11   16.50    1.20
   4  -9 -11   32.80    1.90
   9   4 -11   32.80    1.80
   4  -9 -11   31.60    2.10
   9   4 -11   30.80    1.80
   4  -9 -11   32.20    1.80
   4  -9  11   33.80    2.40
   4  -9  11   35.10    1.80
   9   4  11   35.60    1.80
   9   4  11   33.50    1.70
   3  -9 -11   40.00    2.10
   3  -9 -11   42.00    2.40
   9   3 -11   32.50    2.90
   9   3 -11   39.40    2.10
   9   3 -11   37.50    2.00
   3  -9  11   46.80    2.80
   3  -9  11   38.80    2.10
   9   3  11   41.90    2.10
   3  -9  11   40.10    2.00
   9   3  11   41.10    2.00
   2  -9 -11   22.90    1.40
   9   2 -11   23.20    1.40
   9   2 -11   20.70    1.60
   2  -9 -11   21.30    1.70
   2  -9 -11   23.10    1.40
   9   2  11   20.80    1.30
   2  -9  11   22.60    1.80
   9   2  11   22.80    1.30
   2  -9  11   21.50    1.30
   1  -9 -11   11.20    1.00
   9   1 -11   13.10    1.10
   9   1 -11    9.90    1.20
   1  -9 -11   10.50    1.00
   1  -9 -11   10.50    1.20
   1  -9  11   11.70    1.40
   9   1  11   11.40    0.90
   1  -9  11   11.30    1.00
   9   1  11   11.80    1.00
   0  -9 -11   22.00    1.70
   0  -9 -11   21.80    1.40
   9   0 -11   23.30    1.40
   9   0 -11   21.00    1.60
   0  -9 -11   21.80    1.30
   9   0  11   21.50    1.30
   0  -9  11   21.70    1.30
   0  -9  11   23.10    1.80
   9   0  11   22.00    1.30
  -1  -9 -11   10.50    1.00
   9  -1 -11   11.80    1.20
   9  -1 -11   11.20    1.00
  -1  -9 -11   10.00    1.30
   9  -1  11   10.60    0.90
   9  -1  11    9.70    1.00
   9  -1  11   11.10    0.90
  -1  -9  11   12.90    1.00
  -1  -9  11   11.50    1.30
   9  -2 -11   21.40    1.40
  -2  -9 -11   22.70    1.80
   9  -2 -11   20.60    1.60
   9  -2  11   20.80    1.40
   9  -2  11   21.50    1.30
  -2  -9  11   23.60    1.30
   9  -2  11   19.40    1.30
  -2  -9  11   23.10    1.80
   9  -2  11   22.80    1.30
   9  -3 -11   43.10    2.50
  -3  -9 -11   44.20    2.60
   9  -3 -11   41.50    2.20
   9  -3  11   42.20    2.20
   9  -3  11   40.60    2.10
  -3  -9  11   42.40    2.80
   9  -3  11   41.50    2.20
  -3  -9  11   41.60    2.10
   9  -3  11   38.30    2.10
   9  -4 -11   37.10    1.90
  -4  -9 -11   37.80    2.40
   9  -4 -11   40.00    2.30
   9  -4 -11   36.50    2.00
  -4  -9  11   34.70    2.50
  -4  -9  11   33.90    1.90
   9  -4  11   38.30    2.00
   9  -4  11   31.50    1.90
   9  -4  11   34.80    1.90
   9  -5 -11   16.30    1.30
  -5  -9 -11   20.70    1.70
   9  -5 -11   17.60    1.50
   9  -5  11   20.20    1.40
  -5  -9  11   16.30    1.20
   9  -5  11   20.00    1.20
   5   9  11   19.50    1.30
   9  -5  11   17.80    1.20
   9  -6 -11    2.90    0.80
   9  -6 -11    3.20    0.60
  -6  -9 -11    2.30    0.90
   6   9  11    2.20    0.60
   9  -6  11    2.00    0.60
   9  -6  11    3.00    0.50
   9  -6  11    2.10    0.50
  -6  -9  11    2.10    0.50
   7   9 -11    2.00    0.50
   9  -7 -11    2.20    0.50
   9  -7  11    1.90    0.70
   7   9  11    1.50    0.50
   9  -7  11    2.30    0.50
   9  -7  11    2.20    0.50
   9  -8 -11    1.40    0.50
   8   9 -11    1.80    0.50
   8   9  11    0.80    0.40
   9  -8  11    2.40    0.50
   9  -8  11    1.90    0.50
   9  -9 -11   -0.30    0.40
   9   9 -11    0.10    0.40
   9   9  11   -0.20    0.30
   8 -10 -11    0.40    0.40
  10   8 -11   -0.20    0.30
  10   8  11    0.10    0.30
   7 -10 -11   10.80    0.90
   7 -10 -11   11.80    0.90
  10   7 -11   11.70    0.80
  10   7  11   11.30    0.80
  10   7  11   11.30    0.80
   6 -10 -11    0.40    0.50
  10   6 -11    0.50    0.40
   6 -10 -11    1.10    0.50
  10   6  11    1.10    0.40
  10   6  11    0.70    0.40
   5 -10 -11    3.30    0.60
  10   5 -11    4.10    0.60
   5 -10 -11    4.50    0.70
  10   5  11    3.90    0.50
   5 -10  11    3.00    0.60
  10   5  11    3.50    0.50
  10   4 -11    2.30    0.50
   4 -10 -11    2.40    0.60
   4 -10 -11    3.10    0.60
  10   4  11    1.90    0.50
  10   4  11    1.10    0.50
   4 -10  11    2.80    0.60
   3 -10 -11    3.70    0.60
  10   3 -11    3.40    0.60
  10   3 -11    3.60    0.60
  10   3  11    2.40    0.50
   3 -10  11    1.90    0.50
  10   3  11    2.40    0.50
   3 -10  11    1.90    0.50
   2 -10 -11   10.50    1.00
  10   2 -11    8.30    1.10
  10   2 -11    9.30    1.00
   2 -10  11   10.20    0.90
   2 -10  11    9.70    1.30
  10   2  11   10.80    0.90
  10   2  11   10.60    0.90
   1 -10 -11   17.90    1.20
   1 -10 -11   15.50    1.40
  10   1 -11   15.90    1.20
  10   1 -11   18.20    1.50
   1 -10 -11   18.90    1.30
  10   1  11   17.40    1.10
   1 -10  11   14.40    1.50
   1 -10  11   16.90    1.10
  10   1  11   16.30    1.10
   0 -10 -11    3.50    0.60
   0 -10 -11    3.60    0.90
  10   0 -11    3.70    0.60
   0 -10 -11    5.10    0.70
  10   0 -11    3.10    0.80
  10   0  11    3.00    0.50
   0 -10  11    3.80    0.90
   0 -10  11    3.80    0.60
  10   0  11    3.50    0.50
  -1 -10 -11   15.50    1.20
  10  -1 -11   17.20    1.30
  -1 -10 -11   16.40    1.50
  10  -1 -11   18.30    1.40
  -1 -10 -11   17.30    1.20
  10  -1  11   17.30    1.20
  10  -1  11   17.30    1.10
  -1 -10  11   19.20    1.60
  -1 -10  11   16.50    1.10
  -2 -10 -11   11.60    1.30
  10  -2 -11   10.20    1.10
  10  -2 -11    9.40    1.00
  10  -2  11    7.70    0.80
  -2 -10  11    8.30    0.90
  -2 -10  11    9.10    1.20
  10  -2  11    9.90    0.90
  -3 -10 -11    2.10    0.80
  10  -3 -11    2.90    0.80
  10  -3 -11    1.60    0.60
  -3 -10  11    3.70    0.60
  10  -3  11    3.30    0.60
  10  -3  11    2.50    0.60
  10  -3  11    3.10    0.50
  -4 -10 -11    1.80    0.80
  10  -4 -11    2.80    0.80
  10  -4 -11    2.50    0.60
  -4 -10  11    2.10    0.50
  10  -4  11    2.60    0.50
  10  -4  11    2.00    0.50
  10  -4  11    3.20    0.60
   4  10  11    2.40    0.60
  -5 -10 -11    4.20    0.90
  10  -5 -11    3.00    0.70
  10  -5 -11    4.00    0.60
  10  -5 -11    3.70    0.60
   5  10  11    3.90    0.60
  10  -5  11    3.30    0.60
  10  -5  11    3.80    0.60
  10  -5  11    3.60    0.50
  -5 -10  11    5.70    0.70
  10  -6 -11    0.10    0.40
   6  10 -11    1.00    0.50
  10  -6  11    0.80    0.40
  -6 -10  11    0.60    0.40
   6  10  11    0.30    0.40
  10  -6  11    0.50    0.50
  10  -6  11    0.30    0.40
   7  10 -11   11.00    0.90
  10  -7 -11   11.80    0.90
  10  -7  11   11.40    0.80
   7  10  11   12.10    0.90
  10  -7  11   11.20    0.80
  10  -8 -11    0.20    0.30
   8  10 -11    0.60    0.40
   8  10  11    0.10    0.30
  10  -8  11    0.40    0.30
   7 -11 -11    2.60    0.50
  11   7  11    4.30    0.50
   6 -11 -11    3.20    0.50
   6 -11 -11    3.50    0.50
  11   6 -11    2.40    0.40
  11   6  11    3.20    0.40
  11   6  11    3.20    0.40
  11   5 -11    1.80    0.40
   5 -11 -11    2.20    0.50
   5 -11 -11    2.00    0.50
  11   5  11    1.20    0.40
  11   5  11    2.00    0.40
   4 -11 -11   10.20    0.90
  11   4 -11    7.60    0.80
  11   4  11    7.60    0.70
  11   4  11    8.00    0.70
  11   3 -11    9.70    0.80
   3 -11 -11   10.80    1.00
  11   3 -11   10.90    0.90
  11   3  11    9.80    0.80
   3 -11  11    8.30    0.90
   3 -11  11    8.80    0.80
  11   3  11    9.50    0.80
  11   2 -11   20.50    1.30
   2 -11 -11   18.10    1.30
  11   2  11   19.20    1.20
   2 -11  11   20.20    1.20
  11   1 -11    1.70    0.50
   1 -11 -11    1.80    0.50
  11   1  11    2.10    0.40
   1 -11  11    2.10    0.50
   0 -11 -11    6.60    0.80
  11   0 -11    7.00    1.00
  11   0 -11    6.70    0.90
  11   0  11    7.00    0.70
   0 -11  11    6.60    0.80
  11  -1 -11    2.30    0.70
  11  -1 -11    1.60    0.60
  11  -1  11    1.40    0.50
  -1 -11  11    2.10    0.50
  11  -1  11    2.70    0.50
  11  -2 -11   19.50    1.30
  11  -2 -11   21.20    1.50
  11  -2  11   17.90    1.20
  -2 -11  11   22.30    1.30
  11  -2  11   18.90    1.30
  11  -3 -11    9.50    0.90
  11  -3  11   10.40    0.80
   3  11  11   11.70    0.90
  11  -3  11   10.00    0.90
  -3 -11  11    9.90    0.90
  11  -4 -11    7.70    0.80
  11  -4  11    8.00    0.90
  11  -4  11    8.40    0.80
   4  11  11    8.10    0.80
  -4 -11  11    8.60    0.80
  11  -4  11    9.30    0.80
  11  -5 -11    1.30    0.50
   5  11  11    2.60    0.50
  11  -5  11    2.60    0.50
  11  -5  11    1.80    0.40
  11  -5  11    2.50    0.50
  -5 -11  11    1.80    0.40
   6  11 -11    2.90    0.50
   6  11  11    3.20    0.50
  11  -6  11    3.70    0.40
  11  -6  11    3.30    0.50
   7  11 -11    2.40    0.40
  11  -7  11    3.10    0.40
   7  11  11    2.80    0.40
  11  -7  11    2.80    0.40
   5 -12 -11    1.60    0.40
   4 -12 -11    0.90    0.40
  12   4  11    1.60    0.30
   3 -12 -11    0.00    0.40
  12   3 -11    0.70    0.40
  12   3  11   -0.20    0.30
   3 -12  11    0.30    0.40
   2 -12 -11    9.70    0.80
  12   2 -11    8.50    0.80
   2 -12  11    8.30    0.80
  12   2  11    8.00    0.70
  12   1 -11    7.80    0.80
   1 -12 -11    7.30    0.80
   1 -12  11    7.50    0.80
  12   1  11    6.50    0.70
  12   0 -11    9.10    0.80
   0 -12  11    9.20    0.80
  12   0  11    6.80    0.70
  12  -1 -11    6.90    0.80
  12  -1  11    8.10    0.70
  -1 -12  11    7.40    0.80
  12  -1  11    8.10    0.70
  12  -2 -11    7.70    0.80
  -2 -12  11   10.10    0.80
  12  -2  11    8.50    0.70
   2  12  11    9.30    0.80
  12  -2  11    7.80    0.80
  12  -3 -11   -0.30    0.40
  12  -3  11   -0.30    0.40
  12  -3  11    0.00    0.30
  -3 -12  11    0.30    0.40
   3  12  11    0.30    0.40
  12  -4 -11    2.40    0.50
  -4 -12  11    2.40    0.40
   4  12  11    1.30    0.40
  12  -4  11    1.40    0.50
  12  -4  11    1.90    0.40
   5  12 -11    1.20    0.30
   5  12  11    1.20    0.30
  12  -5  11    1.80    0.30
  13   1 -11    1.50    0.40
  13   0 -11    1.30    0.40
  13   0  11    1.80    0.30
  13  -1 -11    1.00    0.40
  13  -1  11    1.10    0.30
  13  -2 -11    0.10    0.30
   0   0  12   16.30    1.30
   0   1 -12   27.30    1.70
   0   1  12   26.50    1.80
   1   0  12   25.90    1.80
   1   1 -12   76.29    4.20
  -1   1  12   75.19    4.50
   1   1  12   80.79    4.70
   2   1 -12  376.96   18.20
  -1   2 -12  358.66   18.20
  -1   2  12  352.76   20.30
   2   1  12  358.46   20.40
   0   2 -12   95.69    4.90
   2   0  12   86.09    5.40
   0   2  12   90.59    5.30
   1   2 -12  389.56   19.30
   1   2  12  375.06   21.50
   2   2 -12   82.49    4.30
   2   2  12   74.79    4.80
   3   2 -12  235.58   12.30
   2  -3 -12  243.18   11.00
  -2   3 -12  235.28   12.30
   3   2  12  247.08   13.80
  -1   3 -12   23.60    1.70
   1  -3 -12   21.10    1.50
   3   1 -12   24.60    1.60
  -1   3  12   21.60    1.70
   3   1  12   30.40    1.90
   0   3 -12  437.16   21.80
   3   0 -12  439.36   21.70
   0   3  12  443.96   24.30
   3   0  12  409.56   24.40
   3  -1 -12   23.80    1.50
   1   3 -12   26.50    1.80
   1   3  12   25.70    1.90
   2   3 -12  253.47   13.00
   3  -2 -12  254.17   11.50
   3   3 -12 1479.65   72.99
   3  -3 -12 1492.55   64.89
   3  -3 -12 1363.16   76.99
   3   3  12 1496.05   81.79
   3  -3  12 1503.75   76.99
   3  -4 -12   17.00    1.20
   4   3 -12   13.90    1.50
   3  -4 -12   15.40    1.30
   3  -4 -12   15.60    1.20
  -3   4 -12   18.00    1.50
   4   3  12   23.00    1.80
   4   2 -12  140.79    7.10
  -2   4 -12  127.09    7.00
   2  -4 -12  146.69    6.30
   2  -4  12  127.49    7.20
   4   2  12  121.19    7.90
   4   1 -12   39.00    2.50
  -1   4 -12   45.70    2.60
   1  -4 -12   43.80    2.30
   1  -4  12   41.40    2.40
  -1   4  12   40.10    2.70
   4   1  12   40.60    2.90
   0  -4 -12   18.00    1.30
   4   0 -12   19.50    1.20
   0   4 -12   19.90    1.50
   4   0 -12   20.90    1.40
   0  -4  12   18.80    1.30
   0   4  12   18.80    1.60
   4   0  12   18.30    1.70
  -1  -4 -12   39.10    2.20
   1   4 -12   38.40    2.50
   4  -1 -12   40.00    2.10
   1   4  12   39.10    2.70
  -1  -4  12   40.50    2.30
   4  -2 -12  127.29    6.30
   2   4 -12  128.59    7.10
   2   4  12  145.49    8.00
   4  -3 -12   25.20    1.40
   3   4 -12   23.60    1.80
   4  -3 -12   25.90    1.60
   3   4  12   16.90    1.80
   4  -3  12   16.10    1.30
   4   4 -12  597.44   30.80
   4  -4 -12  605.54   32.30
   4  -4 -12  628.84   27.40
   4  -4 -12  616.74   27.70
   4   4  12  631.14   34.60
   4  -4  12  589.44   32.30
   4  -5 -12   54.49    3.20
   5   4 -12   54.79    3.50
   4  -5 -12   52.89    3.00
   4  -5 -12   57.59    2.90
   4  -5  12   54.19    3.20
   5   4  12   51.49    3.80
   5   3 -12    4.90    0.90
   3  -5 -12    4.30    0.80
   3  -5 -12    5.40    0.80
   3  -5 -12    6.50    0.80
   5   3  12    4.70    1.00
   3  -5  12    6.20    0.80
   2  -5 -12  211.08    9.60
   2  -5 -12  208.88    9.70
   5   2 -12  199.78   10.80
   5   2 -12  201.08    9.60
   5   2  12  211.98   12.20
   2  -5  12  215.38   11.20
   1  -5 -12  171.88    8.30
   5   1 -12  175.28    8.20
   5   1 -12  176.08    9.30
   1  -5 -12  178.38    8.30
  -1   5 -12  175.48    9.30
   1  -5  12  170.48    9.60
   5   1  12  199.18   10.50
   0  -5 -12   16.50    1.30
   0   5 -12   17.40    1.40
   5   0 -12   15.50    1.10
   0  -5 -12   17.60    1.20
   0  -5  12   16.20    1.20
   5   0  12   16.10    1.60
   5  -1 -12  165.48    8.20
   5  -1 -12  182.68    8.30
   1   5 -12  191.08    9.40
  -1  -5 -12  185.88    8.30
  -1  -5 -12  184.78    8.30
   1   5  12  172.18   10.50
  -1  -5  12  172.28    9.60
   5  -2 -12  214.98    9.70
   2   5 -12  203.98   10.90
   5  -2 -12  203.78    9.70
   2   5  12  216.48   12.30
   5  -3 -12    5.00    0.80
   5  -3 -12    5.50    0.80
   3   5 -12    7.70    1.20
   3   5  12    4.40    1.00
   5  -4 -12   51.49    2.90
   5  -4 -12   50.29    2.70
   4   5 -12   46.90    3.20
   4   5  12   47.90    3.60
   5  -4  12   52.59    3.00
   5   5 -12   42.60    2.90
   5  -5 -12   43.10    2.70
   5  -5 -12   43.50    2.40
   5   5  12   40.10    3.30
   5  -5  12   39.90    2.60
   6   5 -12   19.70    1.90
   5  -6 -12   17.10    1.50
   5  -6 -12   16.20    1.40
  -6  -5  12   16.60    1.10
   5  -6  12   17.80    1.50
   4  -6 -12   46.90    3.00
   4  -6 -12   52.59    2.70
   6   4 -12   48.90    3.30
   4  -6  12   48.50    3.00
   6   4  12   48.80    3.60
   6   3 -12  165.18    7.60
   6   3 -12  173.08    8.80
   3  -6 -12  164.28    7.70
   3  -6 -12  154.48    7.80
   3  -6  12  156.78    8.90
   6   3  12  165.48    9.80
   2  -6 -12    0.10    0.50
   6   2 -12    1.90    0.70
   6   2 -12    2.20    0.50
   2  -6 -12    1.60    0.60
   6   2  12    2.00    0.80
   2  -6  12    2.60    0.60
   1  -6 -12   35.50    2.10
   1  -6 -12   34.10    2.20
   6   1 -12   32.00    2.40
   6   1 -12   36.70    2.00
   1  -6  12   36.00    2.30
   6   1  12   41.70    2.80
   0   6 -12  100.89    5.50
   0  -6 -12  107.59    4.90
   6   0 -12  102.49    4.80
   0  -6 -12   98.29    4.90
   0  -6  12   93.69    5.60
   6   0  12   98.19    6.20
  -1  -6 -12   38.30    2.20
   1   6 -12   39.00    2.50
   6  -1 -12   38.10    2.10
  -1  -6  12   36.40    2.30
   1   6  12   38.30    2.90
  -2  -6 -12    2.20    0.70
   2   6 -12    2.60    0.80
   6  -2 -12    2.00    0.60
  -2  -6  12    1.40    0.60
   2   6  12    1.80    0.90
   3   6 -12  161.78    8.80
   6  -3 -12  162.68    7.80
   6  -3 -12  165.98    7.70
  -3  -6  12  165.38    9.00
   3   6  12  165.08   10.00
   6  -4 -12   55.19    2.80
   4   6 -12   48.70    3.40
   6  -5 -12   16.80    1.40
   5   6 -12   19.80    2.00
   6  -5  12   18.80    1.60
  -5  -6  12   17.00    1.10
   6   6 -12   -0.30    0.80
   6  -6 -12    0.50    0.70
   6  -6 -12   -0.60    0.50
   6  -6  12    0.70    0.70
   6  -6  12    0.70    0.50
  -6  -6  12    1.30    0.50
   6  -6  12    1.90    0.60
   6  -6  12    0.50    0.50
   6  -6  12    0.10    0.50
   7   6 -12   44.90    2.30
   7   6 -12   45.60    3.40
   6  -7 -12   52.39    2.70
   6  -7 -12   49.20    2.40
   6  -7 -12   44.80    2.30
   6  -7  12   44.50    2.30
   6  -7  12   40.40    2.50
   7   6  12   46.70    2.30
  -7  -6  12   45.30    2.30
   6  -7  12   45.10    2.30
   6  -7  12   47.50    2.40
   6  -7  12   45.50    2.40
   6  -7  12   44.80    2.30
   6  -7  12   45.10    3.00
   7   5 -12   24.50    1.40
   5  -7 -12   22.40    1.50
   5  -7 -12   19.40    1.80
   7   5 -12   24.70    2.20
   5  -7 -12   21.20    1.60
   5  -7 -12   21.50    1.40
   5  -7  12   21.20    1.40
   5  -7  12   23.90    1.40
  -7  -5  12   22.20    1.30
   5  -7  12   24.00    1.40
   5  -7  12   25.20    1.90
   7   4 -12   11.00    1.70
   4  -7 -12   12.90    1.20
   4  -7  12   11.60    1.30
  -7  -4  12   12.60    1.00
   7   3 -12   68.69    4.30
   3  -7 -12   64.89    3.60
   7   3 -12   70.29    3.60
   3  -7  12   71.59    4.10
   7   2 -12   83.59    4.00
   7   2 -12   89.19    4.90
   2  -7 -12   80.19    4.10
   7   2  12   73.59    5.20
   2  -7  12   77.69    4.60
   1  -7 -12   89.19    4.20
   7   1 -12   88.59    4.20
   1  -7 -12   81.19    4.40
   7   1  12   78.39    5.40
   1  -7  12   82.99    4.80
   0  -7 -12    7.40    1.00
   7   0 -12    6.70    0.90
   0  -7  12    8.90    1.00
  -1  -7 -12   89.09    4.40
   7  -1 -12   88.99    4.40
   1   7  12   90.09    5.80
  -1  -7  12   85.99    5.00
  -2  -7 -12   87.39    4.20
   2   7 -12   75.39    4.70
   7  -2 -12   82.39    4.10
  -2  -7  12   78.59    4.70
   7  -3 -12   71.99    3.50
   3   7 -12   65.79    4.20
  -3  -7 -12   67.89    3.60
  -3  -7  12   65.99    4.00
  -3  -7  12   68.39    3.20
   7  -4 -12   11.10    1.20
   4   7 -12   10.90    1.60
  -4  -7  12   10.60    1.30
  -4  -7  12   11.20    0.90
   5   7 -12   24.10    2.20
   7  -5 -12   21.50    1.50
   7  -5 -12   19.80    1.70
  -5  -7  12   22.90    1.40
  -5  -7  12   23.30    1.90
   7  -5  12   22.70    1.30
   7  -5  12   24.80    1.50
   7  -6 -12   43.80    2.40
   6   7 -12   42.90    3.30
   7  -6 -12   42.90    2.70
   7  -6  12   46.20    2.40
  -6  -7  12   49.40    3.10
   7  -6  12   46.60    2.30
   7  -6  12   45.80    2.40
   7  -6  12   46.30    2.30
   7  -6  12   46.10    3.00
   6   7  12   47.50    2.40
   7  -6  12   45.10    2.40
  -6  -7  12   46.10    2.30
   7   7 -12   14.90    1.20
   7  -7 -12   15.10    1.40
   7  -7 -12   16.60    1.30
   7  -7  12   16.20    1.10
   7  -7  12   18.40    1.20
   7   7  12   15.30    1.20
   7  -7  12   17.90    1.20
  -7  -7  12   16.50    1.10
   7  -7  12   16.40    1.60
   7  -7  12   16.60    1.40
  -7  -7  12   16.70    1.70
   7  -8 -12    1.20    0.50
   7  -8 -12    0.90    0.60
   7  -8 -12    1.00    0.50
   8   7 -12    1.00    0.50
   8   7  12    1.70    0.50
   7  -8  12    1.60    0.50
   7  -8  12    0.80    0.50
   7  -8  12    1.60    0.60
   8   6 -12   18.80    1.30
   6  -8 -12   16.60    1.50
   6  -8 -12   21.00    1.30
   6  -8 -12   19.30    1.40
   8   6  12   18.60    1.30
   6  -8  12   19.30    1.30
   6  -8  12   19.70    1.30
   6  -8  12   20.90    1.30
   6  -8  12   19.90    1.30
   6  -8  12   19.40    1.80
   5  -8 -12   57.39    3.00
   8   5 -12   54.59    2.80
   8   5 -12   57.79    4.00
   5  -8 -12   60.69    2.80
   5  -8 -12   59.79    3.20
   5  -8  12   59.39    3.70
   5  -8  12   57.29    2.80
   5  -8  12   61.79    2.90
   5  -8  12   59.49    2.90
   5  -8  12   58.79    2.80
   8   5  12   58.49    2.80
   8   5  12   56.49    2.80
   8   4 -12   38.30    2.90
   4  -8 -12   34.00    1.90
   8   4 -12   34.20    1.90
   4  -8 -12   35.50    2.20
   8   4 -12   32.50    1.80
   4  -8 -12   35.30    1.90
   8   4  12   32.20    1.80
   8   4  12   32.00    1.80
   4  -8  12   36.30    2.40
   4  -8  12   35.30    1.90
   4  -8  12   35.00    1.80
   4  -8  12   36.30    1.80
   3  -8 -12   44.20    2.50
   8   3 -12   39.50    2.40
   8   3 -12   40.20    3.00
   8   3 -12   41.70    2.20
   3  -8 -12   42.30    2.10
   3  -8  12   40.70    2.10
   8   3  12   39.10    2.00
   8   2 -12    3.30    0.80
   2  -8 -12    3.30    0.80
   8   2 -12    2.40    1.00
   2  -8 -12    1.90    0.60
   2  -8 -12    4.20    0.60
   2  -8  12    3.20    0.50
   2  -8  12    3.40    0.80
   8   2  12    1.60    0.50
   8   1 -12  174.98    8.40
   1  -8 -12  171.88    8.50
   1  -8 -12  182.98    7.90
   1  -8  12  174.18    7.80
   1  -8  12  189.68    9.80
   0  -8 -12   33.00    2.10
   8   0 -12   37.50    2.00
   0  -8 -12   31.20    1.70
   0  -8  12   31.60    2.20
   0  -8  12   31.80    1.70
   8  -1 -12  185.18    8.60
  -1  -8 -12  176.28    8.70
  -1  -8  12  186.38   10.00
  -1  -8  12  182.68    8.00
  -2  -8 -12    2.30    0.80
   8  -2 -12    3.00    0.80
  -2  -8  12    3.10    0.80
  -2  -8  12    2.80    0.50
   8  -2  12    4.20    0.60
   8  -3 -12   38.80    2.30
   8  -3 -12   35.10    2.10
  -3  -8 -12   40.80    2.40
   8  -3 -12   38.90    2.10
  -3  -8  12   42.50    2.00
  -3  -8  12   40.50    2.70
   8  -3  12   41.30    2.00
   8  -3  12   39.00    2.10
   8  -4 -12   33.50    1.90
  -4  -8 -12   34.10    2.20
   8  -4 -12   30.80    2.10
   8  -4 -12   29.30    1.80
   4   8 -12   32.90    2.70
  -4  -8  12   32.90    2.40
   8  -4  12   34.50    1.90
   8  -4  12   32.60    1.80
  -4  -8  12   32.00    1.70
   8  -4  12   36.10    1.80
   8  -4  12   32.10    1.70
   8  -5 -12   55.89    3.20
  -5  -8 -12   59.99    3.30
   8  -5 -12   58.39    3.00
   5   8 -12   57.29    3.90
  -5  -8  12   64.19    3.70
   8  -5  12   58.19    2.80
   5   8  12   54.29    2.90
  -5  -8  12   62.09    2.80
   8  -5  12   61.49    3.00
   8  -5  12   60.59    3.00
   8  -5  12   58.69    2.80
   8  -6 -12   19.70    1.30
   8  -6 -12   16.50    1.50
  -6  -8 -12   18.60    1.70
   8  -6  12   17.70    1.20
  -6  -8  12   19.20    1.20
  -6  -8  12   18.40    1.70
   8  -6  12   18.90    1.40
   6   8  12   19.70    1.30
   8  -6  12   20.90    1.30
   8  -6  12   19.90    1.30
   7   8 -12    1.50    0.60
   8  -7 -12    0.80    0.70
  -7  -8 -12    1.30    0.90
   8  -7 -12    1.20    0.50
   8  -7  12    1.30    0.50
   8  -7  12    1.40    0.50
   7   8  12    1.80    0.50
   8  -7  12    0.70    0.50
   8  -7  12    1.50    0.70
  -7  -8  12    1.10    0.40
   8  -8 -12   27.60    1.60
   8   8 -12   25.80    1.50
   8  -8  12   27.00    1.50
   8  -8  12   24.80    1.40
   8  -8  12   28.00    1.60
   8   8  12   27.10    1.50
   8  -9 -12    0.90    0.50
   9   8 -12    0.80    0.40
   8  -9  12    1.10    0.40
   9   8  12    1.00    0.40
   7  -9 -12    3.10    0.50
   9   7 -12    2.30    0.60
   7  -9 -12    3.30    0.60
   9   7  12    2.90    0.50
   7  -9  12    3.40    0.60
   6  -9 -12   19.00    1.30
   6  -9 -12   19.90    1.30
   9   6 -12   19.40    1.30
   9   6  12   18.70    1.20
   6  -9  12   19.70    1.30
   9   6  12   18.30    1.20
   9   5 -12    2.40    0.60
   5  -9 -12    2.40    0.60
   5  -9 -12    2.70    0.80
   5  -9 -12    3.10    0.60
   5  -9  12    2.60    0.60
   9   5  12    2.30    0.50
   5  -9  12    2.00    0.60
   9   5  12    2.60    0.50
   4  -9 -12   23.40    1.50
   9   4 -12   22.10    1.40
   9   4 -12   21.70    1.40
   4  -9 -12   22.50    1.70
   4  -9 -12   23.40    1.40
   9   4  12   21.80    1.40
   4  -9  12   21.90    1.90
   9   4  12   21.10    1.30
   4  -9  12   23.10    1.40
   9   3 -12    2.30    1.00
   9   3 -12    1.60    0.50
   3  -9 -12    1.80    0.70
   3  -9 -12    0.60    0.50
   9   3 -12    1.70    0.50
   9   3  12    2.20    0.50
   3  -9  12    2.00    0.80
   3  -9  12    3.30    0.60
   9   3  12    2.80    0.50
   3  -9  12    3.30    0.60
   9   2 -12   26.40    1.50
   9   2 -12   24.30    1.80
   2  -9 -12   23.30    1.70
   2  -9 -12   24.90    1.50
   9   2  12   23.50    1.40
   2  -9  12   22.90    1.40
   2  -9  12   24.40    1.90
   9   2  12   23.50    1.40
   1  -9 -12   60.99    2.90
   9   1 -12   57.69    2.90
   1  -9 -12   59.39    2.90
   9   1 -12   52.29    3.20
   1  -9 -12   62.19    3.30
   9   1  12   59.49    2.80
   1  -9  12   61.19    2.80
   1  -9  12   59.79    3.70
   9   1  12   63.59    2.90
   0  -9 -12   13.90    1.40
   0  -9 -12   14.50    1.10
   9   0 -12   13.80    1.30
   9   0 -12   14.20    1.10
   0  -9 -12   14.70    1.10
   0  -9  12   15.20    1.10
   9   0  12   15.00    1.00
   9   0  12   13.70    1.00
   0  -9  12   16.70    1.50
  -1  -9 -12   65.29    3.40
   9  -1 -12   64.29    3.00
  -1  -9 -12   58.09    2.90
   9  -1 -12   57.29    3.20
   9  -1  12   63.89    2.90
   9  -1  12   58.89    3.00
   9  -1  12   60.49    2.90
  -1  -9  12   58.19    3.70
  -1  -9  12   60.89    2.90
   9  -2 -12   22.90    1.50
  -2  -9 -12   22.50    1.80
   9  -2 -12   24.80    1.70
   9  -2  12   23.60    1.50
  -2  -9  12   28.50    2.00
   9  -2  12   25.90    1.40
   9  -2  12   27.60    1.50
   9  -2  12   23.90    1.40
  -2  -9  12   23.70    1.40
   9  -3 -12    4.00    0.80
  -3  -9 -12    3.30    0.90
   9  -3 -12    3.30    0.60
  -3  -9  12    1.20    0.50
   9  -3  12    1.70    0.50
   9  -3  12    1.10    0.50
  -3  -9  12    2.80    0.80
   9  -3  12    2.20    0.50
   9  -3  12    2.00    0.60
  -4  -9 -12   19.00    1.70
   9  -4 -12   20.70    1.40
   9  -4 -12   23.20    1.40
   9  -4 -12   22.20    1.70
  -4  -9  12   21.30    1.30
   9  -4  12   22.80    1.30
   4   9  12   19.50    1.40
   9  -4  12   21.70    1.50
   9  -4  12   23.80    1.30
   9  -4  12   22.40    1.40
  -4  -9  12   23.10    1.90
   9  -5 -12    3.10    0.60
  -5  -9 -12    2.50    0.90
   9  -5 -12    2.50    0.80
   9  -5  12    2.10    0.50
   9  -5  12    1.60    0.50
   9  -5  12    1.80    0.50
   9  -5  12    1.80    0.60
   5   9  12    2.50    0.60
  -5  -9  12    2.20    0.50
   9  -6 -12   20.50    1.30
  -6  -9 -12   18.80    1.60
   9  -6 -12   20.10    1.50
   9  -6  12   19.30    1.20
   9  -6  12   19.50    1.30
   9  -6  12   20.60    1.20
   9  -6  12   18.80    1.40
  -6  -9  12   18.80    1.20
   6   9  12   20.80    1.30
   7   9 -12    3.40    0.60
   9  -7 -12    3.50    0.60
   9  -7  12    2.30    0.50
   9  -7  12    2.70    0.50
   7   9  12    2.50    0.50
   9  -8 -12    1.00    0.50
   8   9 -12    1.20    0.40
   9  -8  12    1.60    0.50
   9  -8  12    1.30    0.50
   8   9  12    1.10    0.40
   9   9 -12    0.50    0.30
   9  -9 -12    0.10    0.40
   9   9  12    0.00    0.30
   8 -10 -12    0.30    0.40
  10   8 -12    0.90    0.30
  10   8  12    0.50    0.30
   7 -10 -12    2.30    0.50
  10   7 -12    2.90    0.40
   7 -10 -12    2.10    0.50
  10   7  12    2.30    0.40
   6 -10 -12    1.70    0.50
   6 -10 -12    1.80    0.50
  10   6 -12    2.30    0.50
  10   6  12    1.90    0.40
  10   6  12    1.50    0.40
   5 -10 -12    2.40    0.60
  10   5 -12    2.90    0.50
   5 -10 -12    3.10    0.60
  10   5  12    4.10    0.50
  10   5  12    3.50    0.50
   4 -10 -12    7.60    0.90
  10   4 -12    8.20    0.80
  10   4 -12    7.70    0.80
  10   4  12    8.20    0.80
   4 -10  12    7.10    0.90
  10   4  12    8.20    0.80
   3 -10 -12    9.90    1.00
  10   3 -12    9.70    0.90
   3 -10  12    8.20    0.80
  10   3  12    7.30    0.80
  10   3  12    6.90    0.80
   3 -10  12    7.50    0.80
  10   2 -12   38.90    2.40
  10   2 -12   40.10    2.10
   2 -10 -12   39.70    2.10
   2 -10 -12   41.00    2.40
  10   2  12   41.60    2.00
   2 -10  12   35.80    2.00
  10   2  12   40.90    2.00
   2 -10  12   38.00    2.70
  10   1 -12   30.60    2.00
  10   1 -12   28.80    1.70
   1 -10 -12   27.50    1.60
   1 -10 -12   27.00    1.90
  10   1  12   28.20    1.50
   1 -10  12   29.00    1.60
  10   1  12   26.90    1.50
   1 -10  12   26.90    2.10
  10   0 -12    2.00    0.80
   0 -10 -12    2.50    0.60
   0 -10 -12    2.80    0.60
   0 -10 -12    2.60    0.80
  10   0 -12    2.10    0.60
   0 -10  12    2.80    0.80
  10   0  12    2.10    0.50
   0 -10  12    2.40    0.50
  10   0  12    1.70    0.50
  10  -1 -12   27.70    1.60
  -1 -10 -12   26.50    1.50
  -1 -10 -12   26.80    1.90
  10  -1 -12   24.90    1.80
  10  -1  12   29.00    1.50
  -1 -10  12   30.70    2.10
  10  -1  12   28.30    1.60
  10  -1  12   26.00    1.50
  -1 -10  12   25.20    1.50
  10  -2 -12   37.40    2.30
  10  -2 -12   39.30    2.00
  -2 -10 -12   41.00    2.40
  -2 -10  12   38.60    2.60
  10  -2  12   33.50    1.90
  10  -2  12   36.90    1.90
  -2 -10  12   41.90    2.00
  10  -2  12   36.10    2.00
  10  -2  12   37.40    2.00
  10  -3 -12    6.40    1.00
  10  -3 -12    9.10    1.00
  -3 -10 -12    6.10    1.00
  10  -3  12    8.60    0.90
  10  -3  12    9.00    0.90
  -3 -10  12    7.60    0.90
  10  -3  12   10.80    1.00
  10  -4 -12    5.50    0.70
  10  -4 -12    5.80    0.90
  -4 -10 -12    9.10    1.20
   4  10  12    9.30    0.90
  10  -4  12    6.20    0.80
  10  -4  12    6.90    0.80
  -4 -10  12    9.20    0.80
  10  -4  12    7.20    0.80
  10  -5 -12    3.90    0.60
  10  -5 -12    3.10    0.80
  10  -5 -12    4.00    0.60
  -5 -10 -12    3.00    0.80
   5  10  12    3.60    0.60
  10  -5  12    3.70    0.60
  -5 -10  12    3.50    0.50
  10  -5  12    4.00    0.60
  10  -5  12    3.80    0.50
  10  -6 -12    1.30    0.40
   6  10 -12    2.20    0.50
  10  -6  12    0.90    0.40
  10  -6  12    1.50    0.40
  -6 -10  12    1.30    0.40
   6  10  12    1.60    0.50
  10  -6  12    2.00    0.60
  10  -7 -12    2.90    0.50
   7  10 -12    3.40    0.50
   7  10  12    2.40    0.50
  10  -7  12    2.40    0.50
  10  -7  12    2.90    0.50
   8  10 -12    0.70    0.40
  10  -8 -12    1.40    0.40
   8  10  12    0.30    0.30
  10  -8  12    0.70    0.40
   6 -11 -12   -0.10    0.40
  11   6 -12   -0.20    0.30
   6 -11 -12   -0.30    0.40
  11   6  12    0.00    0.30
   5 -11 -12    4.70    0.60
  11   5 -12    3.60    0.50
  11   5  12    3.70    0.50
  11   5  12    5.00    0.50
  11   4 -12    2.00    0.40
   4 -11 -12    2.10    0.50
  11   4  12    1.30    0.40
  11   4  12    1.30    0.40
  11   3 -12    0.80    0.50
   3 -11 -12    0.20    0.50
  11   3  12    0.90    0.40
   3 -11  12    0.50    0.40
  11   3  12    0.10    0.40
   2 -11 -12    2.00    0.50
  11   2 -12    3.00    0.60
   2 -11  12    2.40    0.50
  11   2  12    2.40    0.50
  11   2  12    1.90    0.40
  11   1 -12    6.00    0.70
   1 -11 -12    4.40    0.60
   1 -11  12    4.80    0.60
  11   1  12    4.80    0.60
  11   1  12    5.70    0.70
  11   0 -12    0.90    0.50
   0 -11 -12    1.00    0.50
  11   0 -12    0.50    0.70
  11   0  12    0.70    0.40
   0 -11  12    0.00    0.50
  11  -1 -12    4.50    0.60
  11  -1 -12    4.50    0.90
  11  -1  12    5.10    0.60
  11  -1  12    5.60    0.60
  -1 -11  12    4.30    0.60
  11  -2 -12    2.20    0.70
  11  -2 -12    1.20    0.50
  -2 -11  12    2.60    0.50
  11  -2  12    2.10    0.50
  11  -2  12    2.00    0.50
  11  -3 -12    0.70    0.50
  11  -3  12    0.30    0.50
  11  -3  12    0.80    0.40
  -3 -11  12    0.80    0.50
   3  11  12    0.10    0.40
  11  -4 -12    1.50    0.50
  -4 -11  12    1.50    0.40
  11  -4  12    1.20    0.50
   4  11  12    1.80    0.50
  11  -4  12    1.80    0.40
  11  -4  12    2.00    0.50
  11  -5 -12    4.40    0.60
  11  -5  12    4.20    0.50
   5  11  12    4.50    0.50
  -5 -11  12    5.40    0.70
  11  -5  12    6.50    0.80
  11  -5  12    5.40    0.60
   6  11 -12    0.60    0.40
  11  -6  12    0.40    0.30
  11  -6  12    0.10    0.30
   6  11  12   -0.30    0.30
   7  11  12    0.70    0.30
  11  -7  12    0.00    0.30
   5 -12 -12    3.00    0.50
   4 -12 -12    0.50    0.40
  12   4  12    0.80    0.30
   3 -12 -12   -0.30    0.40
  12   3 -12   -0.20    0.40
  12   3  12    0.10    0.30
   2 -12 -12    0.40    0.40
  12   2 -12    0.10    0.40
  12   2  12    0.20    0.30
   2 -12  12    0.20    0.40
  12   1 -12    4.00    0.60
   1 -12 -12    3.10    0.50
  12   1  12    3.30    0.50
   1 -12  12    3.00    0.50
   0 -12 -12    0.70    0.40
  12   0 -12    0.40    0.40
  12   0  12    0.10    0.40
   0 -12  12   -0.20    0.40
  12  -1 -12    3.80    0.60
  -1 -12  12    3.30    0.50
  12  -1  12    3.20    0.40
  12  -2 -12    0.70    0.40
  12  -2  12   -0.20    0.30
   2  12  12    0.40    0.40
  -2 -12  12    0.40    0.40
  12  -2  12    0.00    0.40
  12  -3 -12    0.10    0.40
  -3 -12  12    0.30    0.40
  12  -3  12    0.10    0.30
   3  12  12    0.20    0.40
  12  -3  12   -0.10    0.40
  12  -4 -12    0.30    0.40
  12  -4  12    0.30    0.30
  12  -4  12    0.90    0.40
  -4 -12  12    0.30    0.40
   4  12  12    0.20    0.30
  12  -5  12    2.90    0.40
   5  12  12    2.90    0.40
  13   0 -12    1.60    0.40
  13  -1 -12    0.80    0.30
   0   0  13    2.00    0.40
   1   0 -13  202.18   10.30
   0   1 -13  209.08   10.40
   1   0  13  200.68   11.50
   0   1  13  197.78   11.50
   1   1 -13  303.67   15.50
   1   1  13  312.27   17.30
  -1   1  13  303.37   17.20
  -1   2 -13    9.00    1.00
   2   1 -13    6.10    0.90
   2   1  13    9.30    1.10
  -1   2  13   10.20    0.90
   2   0 -13  506.25   25.10
   0   2 -13  525.85   25.20
   2   0  13  476.85   28.10
   0   2  13  496.15   28.10
   1   2 -13    7.50    0.90
   1   2  13    7.60    1.00
   2   2 -13  287.07   14.50
   2   2  13  281.97   16.20
   3   2 -13  205.48    9.90
  -2   3 -13  195.18    9.90
   2  -3 -13  206.78    8.80
   3   2  13  179.08   11.10
   2  -3  13  171.28   10.20
   3   1 -13  100.39    5.70
  -1   3 -13   99.49    5.70
   3   1  13  112.49    6.40
  -1   3  13  113.59    6.30
   3   0 -13   92.69    4.80
   0   3 -13   88.59    4.90
   3   0  13   88.89    5.40
   0   3  13   90.89    5.40
   1   3 -13  105.69    5.80
   3  -1 -13  110.99    5.10
   1   3  13  107.29    6.40
   2   3 -13  184.38    9.50
   3  -2 -13  170.48    8.40
   2   3  13  193.98   10.70
   3  -3 -13   35.00    2.00
   3   3  13   35.50    2.50
   3  -3  13   27.80    1.90
  -3   4 -13  444.86   22.60
   3  -4 -13  425.86   23.70
   3  -4 -13  456.75   20.20
   4   3 -13  436.96   22.70
   3  -4 -13  429.46   20.30
   4   3  13  476.95   25.40
   3  -4  13  458.25   23.70
   4   2 -13  212.38   10.60
   2  -4 -13  207.18    9.40
  -2   4 -13  201.18   10.60
   2  -4 -13  201.38    9.40
   4   2  13  197.98   11.80
   2  -4  13  200.78   10.90
   1  -4 -13  107.69    5.00
  -1   4 -13  105.79    5.50
   4   1 -13  109.89    5.50
   4   1  13   94.99    6.20
  -1   4  13   90.19    6.00
   1  -4  13  104.29    5.60
   4   0 -13  202.38   10.60
   0   4 -13  207.48   10.70
   4   0 -13  206.78    9.40
   0  -4 -13  215.78    9.50
   0   4  13  209.58   11.90
   0  -4  13  202.78   11.00
   4   0  13  200.28   11.90
   4  -1 -13   89.79    4.60
   1   4 -13  100.29    5.30
  -1  -4  13  103.19    5.40
   1   4  13   95.79    5.90
   2   4 -13  202.78   10.50
   4  -2 -13  197.08    9.30
   2   4  13  203.38   11.70
   4  -3 -13  464.15   21.00
   4  -3 -13  485.75   21.20
   3   4 -13  464.95   23.60
   3   4  13  449.86   26.50
   4  -4 -13 1804.72   95.69
   4  -4 -13 1853.51   81.69
   4   4 -13 1783.62   90.59
   4  -4 -13 1889.61   80.69
   4  -4  13 1725.83   95.59
   4   4  13 1870.11  101.69
   4  -5 -13  311.27   14.00
   4  -5 -13  306.67   16.20
   4  -5 -13  321.67   13.90
   5   4 -13  285.07   15.70
   4  -5  13  296.17   16.20
   5   4  13  292.07   17.60
   5   3 -13   40.10    2.80
   3  -5 -13   42.70    2.30
   3  -5 -13   45.60    2.50
   5   3  13   42.10    3.10
   3  -5  13   38.80    2.50
   5   2 -13  554.24   28.70
   2  -5 -13  569.54   25.70
  -2   5 -13  565.64   28.60
   5   2 -13  540.45   25.70
   2  -5 -13  584.74   25.60
   5   2  13  585.44   32.20
   2  -5  13  580.84   30.10
   1  -5 -13  137.99    6.60
   5   1 -13  135.79    6.50
  -1   5 -13  140.09    7.40
   1  -5 -13  137.39    6.50
   5   1 -13  129.09    7.30
   1  -5  13  134.99    7.50
   5   1  13  155.88    8.30
   0  -5 -13   72.19    3.60
   0   5 -13   72.79    4.10
   5   0 -13   72.89    3.50
   0  -5 -13   72.39    3.70
   5   0  13   74.89    4.60
   0  -5  13   69.29    4.10
   0   5  13   73.39    4.60
  -1  -5 -13  141.19    6.60
   5  -1 -13  136.59    6.60
   1   5 -13  144.89    7.50
   5  -1 -13  141.69    6.60
  -1  -5 -13  145.29    6.60
   1   5  13  138.19    8.40
  -1  -5  13  136.79    7.60
   5  -2 -13  594.54   26.70
   5  -2 -13  583.14   26.90
   2   5 -13  595.64   30.00
  -2  -5 -13  600.84   27.00
   2   5  13  604.94   33.70
   5  -3 -13   44.00    2.40
   3   5 -13   42.90    2.90
   5  -3 -13   45.10    2.60
   3   5  13   46.90    3.30
   5  -4 -13  298.87   13.80
   5  -4 -13  315.67   13.80
   4   5 -13  277.67   15.50
   4   5  13  311.27   17.50
   5  -4  13  293.97   16.00
   5   5 -13  138.89    7.50
   5  -5 -13  137.09    6.50
   5  -5  13  128.99    7.40
   5  -6 -13   10.40    1.10
   6   5 -13   12.10    1.60
   5  -6 -13   11.10    1.30
   5  -6  13   11.40    1.30
  -6  -5  13   12.10    1.00
   4  -6 -13   18.90    1.30
   6   4 -13   16.40    1.80
   4  -6  13   15.90    1.40
   6   3 -13   44.60    2.90
   3  -6 -13   39.90    2.30
   3  -6 -13   38.30    2.50
   3  -6  13   41.90    2.60
   6   3  13   40.80    3.10
   6   2 -13   80.59    3.90
   2  -6 -13   83.09    4.00
   2  -6 -13   77.19    4.10
   6   2 -13   86.89    4.70
   6   2  13   76.89    5.20
   2  -6  13   76.69    4.50
   6   1 -13   44.80    2.90
   1  -6 -13   48.20    2.50
   6   1 -13   46.40    2.40
   1  -6 -13   47.30    2.70
   1  -6  13   44.80    2.80
   6   1  13   45.80    3.30
   0  -6 -13   11.70    1.20
   0  -6 -13   14.70    1.20
   6   0 -13   12.20    1.00
   0   6 -13   14.70    1.40
   0   6  13   15.50    1.60
   0  -6  13   12.80    1.10
   1   6 -13   45.80    3.00
  -1  -6 -13   47.10    2.60
   6  -1 -13   48.70    2.50
  -1  -6  13   46.90    2.80
   1   6  13   47.50    3.40
  -2  -6 -13   80.89    4.00
   2   6 -13   79.59    4.60
   6  -2 -13   76.49    3.90
   2   6  13   85.59    5.30
  -2  -6  13   78.19    4.60
   6  -3 -13   40.10    2.40
   3   6 -13   39.60    2.80
   6  -3 -13   42.80    2.30
   3   6  13   38.80    3.10
  -3  -6  13   37.40    2.50
   4   6 -13   12.30    1.60
   6  -4 -13   18.60    1.30
   5   6 -13   12.90    1.70
   6  -5 -13    9.30    1.10
   6  -5  13   11.10    1.20
  -5  -6  13   10.50    0.90
   6  -6 -13   46.70    2.80
   6   6 -13   53.09    3.60
   6  -6 -13   50.89    2.60
   6  -6  13   49.10    2.60
  -6  -6  13   51.49    2.50
   6  -6  13   52.09    2.50
   6  -6  13   52.59    2.50
   6  -6  13   48.70    2.60
   6  -6  13   53.49    3.30
   7   6 -13   11.20    1.70
   6  -7 -13   11.00    1.20
   6  -7 -13   10.80    1.10
   7   6 -13   11.20    1.00
   6  -7 -13   10.60    1.00
   6  -7  13   13.10    1.10
   6  -7  13   12.80    1.40
   7   6  13   13.90    1.10
   6  -7  13   12.70    1.00
   6  -7  13   13.00    1.00
   6  -7  13   11.80    1.10
  -7  -6  13   12.90    1.00
   7   5 -13   57.79    3.90
   5  -7 -13   54.89    2.80
   7   5 -13   55.39    2.80
   5  -7 -13   57.19    2.90
   5  -7 -13   55.39    3.20
   7   5  13   61.49    2.80
   5  -7  13   62.09    3.60
  -7  -5  13   57.59    2.70
   5  -7  13   55.99    2.80
   5  -7  13   57.79    2.80
   5  -7  13   60.49    2.80
   5  -7  13   58.49    2.90
   7   4 -13  119.89    6.70
   4  -7 -13  106.89    5.10
   4  -7 -13  107.79    5.60
   4  -7  13  122.99    6.50
  -7  -4  13  113.89    5.10
   4  -7  13  112.59    5.10
   4  -7  13  116.29    5.10
   7   3 -13   48.10    3.20
   3  -7 -13   44.50    2.50
   7   3 -13   40.80    2.50
   3  -7  13   51.19    2.90
  -7  -3  13   41.10    2.20
   7   2 -13   21.70    1.40
   2  -7 -13   20.30    1.50
   7   2 -13   21.00    1.90
   7   2  13   17.20    2.00
   2  -7  13   17.40    1.50
   1  -7 -13  151.98    7.00
   1  -7 -13  140.79    7.20
   7   1 -13  145.89    6.90
   1  -7  13  147.39    8.00
   7   1  13  138.29    8.80
   7   0 -13    4.90    0.70
   0  -7 -13    3.30    0.80
   0   7  13    3.50    1.00
   0  -7  13    4.00    0.80
  -1  -7 -13  153.08    7.10
   7  -1 -13  151.48    7.10
   1   7  13  150.78    9.20
  -1  -7  13  142.29    8.20
   7  -2 -13   21.50    1.50
  -2  -7 -13   19.80    1.50
   2   7 -13   19.70    1.80
  -2  -7  13   18.80    1.60
  -3  -7 -13   48.20    2.60
   7  -3 -13   47.50    2.60
   3   7 -13   38.50    3.00
  -3  -7  13   47.10    2.90
  -3  -7  13   44.80    2.20
  -4  -7 -13  107.89    5.70
   7  -4 -13  116.19    5.60
   4   7 -13  119.09    6.60
  -4  -7  13  113.09    5.10
   7  -4  13  110.29    5.10
  -4  -7  13  122.59    6.50
   7  -5 -13   58.49    2.90
   5   7 -13   62.89    3.90
   7  -5 -13   55.39    3.10
  -5  -7  13   58.49    2.70
   7  -5  13   57.09    2.90
   7  -5  13   54.79    2.70
  -5  -7  13   59.79    3.60
   5   7  13   56.69    2.80
   7  -5  13   53.79    2.80
   7  -5  13   52.49    2.70
   7  -6 -13   11.80    1.10
   7  -6 -13   12.40    1.30
   6   7 -13   14.20    1.80
  -6  -7  13   11.80    1.00
   7  -6  13    9.70    1.00
   7  -6  13   10.40    1.00
   7  -6  13    9.30    1.10
   6   7  13   11.10    1.10
  -6  -7  13   11.50    1.50
   7  -6  13   11.30    1.00
   7  -7 -13    8.10    1.10
   7  -7 -13    8.30    0.90
   7   7 -13    7.00    0.80
   7  -7  13    7.30    0.80
   7   7  13    7.70    0.90
  -7  -7  13    6.80    0.70
  -7  -7  13    6.80    1.10
   7  -7  13    7.30    0.90
   7  -7  13    7.70    0.90
   8   7 -13    3.30    0.60
   7  -8 -13    3.10    0.70
   7  -8 -13    3.50    0.80
   8   7  13    2.10    0.60
   7  -8  13    3.00    0.60
   7  -8  13    2.60    0.60
   7  -8  13    2.90    0.50
   6  -8 -13    9.70    1.00
   6  -8 -13   10.80    1.20
   8   6 -13    8.50    0.90
   6  -8 -13    9.30    1.10
   6  -8  13   11.40    1.10
   8   6  13    8.90    1.00
   6  -8  13   10.60    1.00
   6  -8  13    9.60    1.30
   6  -8  13    7.80    0.90
   8   5 -13    7.90    0.90
   5  -8 -13    8.60    1.00
   8   5 -13    9.90    1.80
   5  -8 -13    8.70    1.00
   5  -8 -13   10.00    1.20
   5  -8  13    8.70    1.20
   5  -8  13    7.10    0.90
   5  -8  13    8.70    0.90
   5  -8  13    8.90    1.00
   8   5  13    8.00    0.90
   5  -8  13   10.20    1.00
   8   4 -13    9.60    1.60
   8   4 -13    8.10    0.90
   4  -8 -13    6.70    1.00
   4  -8 -13    8.40    1.00
   4  -8 -13    7.60    0.90
   8   4 -13    6.90    0.90
   4  -8  13    8.20    0.90
   4  -8  13    7.00    0.80
   4  -8  13    7.00    1.10
   8   4  13    7.40    0.90
   8   3 -13   12.70    1.10
   8   3 -13   12.20    1.70
   3  -8 -13   10.40    1.00
   3  -8 -13   11.20    1.30
   8   3 -13   12.30    1.30
   8   3  13   13.70    0.90
   3  -8  13   13.20    1.00
   3  -8  13   14.60    1.00
   8   3  13   14.80    1.10
   2  -8 -13   65.29    3.20
   2  -8 -13   63.49    3.50
   8   2 -13   68.49    3.50
   8   2  13   64.89    3.10
   2  -8  13   64.79    3.10
   2  -8  13   74.09    4.00
   1  -8 -13   12.90    1.30
   1  -8 -13   11.70    1.00
   8   1 -13   12.60    1.20
   1  -8 -13    9.70    1.00
   1  -8  13   10.80    0.90
   1  -8  13   13.00    1.30
   0  -8 -13   23.60    1.40
   0  -8 -13   25.00    1.80
   0  -8  13   25.60    1.40
   0  -8  13   25.20    1.90
  -1  -8 -13   12.80    1.30
   8  -1 -13    9.40    1.20
   8  -1  13   14.70    1.00
  -1  -8  13   12.10    1.30
  -1  -8  13   11.30    0.90
  -2  -8 -13   68.89    3.60
  -2  -8 -13   65.39    3.20
   8  -2 -13   63.79    3.50
  -2  -8  13   70.39    3.20
  -2  -8  13   71.19    4.10
   8  -2  13   64.09    3.10
  -3  -8 -13   12.70    1.40
   8  -3 -13   14.40    1.30
   8  -3 -13   10.80    1.00
   8  -3 -13   12.80    1.10
  -3  -8  13   13.30    1.40
   8  -3  13   11.50    1.00
   8  -3  13   12.40    1.10
  -3  -8  13   13.20    1.00
   8  -4 -13    7.40    1.00
   4   8 -13    8.90    1.50
  -4  -8 -13    5.10    1.10
   8  -4 -13    8.00    0.80
   8  -4  13    7.60    0.90
   8  -4  13    8.20    0.90
  -4  -8  13    7.50    0.90
   4   8  13    8.40    0.90
  -4  -8  13    8.80    1.30
   8  -4  13    8.00    1.00
   8  -4  13    8.40    0.90
  -5  -8 -13    7.40    1.20
   8  -5 -13    8.20    1.10
   8  -5 -13    7.80    1.00
   5   8  13    9.70    1.00
   8  -5  13    8.00    0.90
   8  -5  13   10.10    0.90
  -5  -8  13    9.60    1.30
  -5  -8  13    8.40    0.90
   8  -5  13   10.00    0.90
   8  -5  13    9.50    1.00
  -6  -8 -13    9.30    1.30
   8  -6 -13    9.80    1.20
   8  -6 -13    9.00    1.00
   8  -6  13    9.50    0.90
   6   8  13   12.00    1.00
  -6  -8  13   11.80    1.40
   8  -6  13   10.10    1.10
   8  -6  13   10.90    1.00
   8  -6  13   10.90    0.90
  -6  -8  13   10.50    1.00
  -7  -8 -13    2.90    0.90
   7   8 -13    2.50    0.60
   8  -7 -13    2.30    0.60
   8  -7 -13    4.00    0.90
   8  -7  13    2.70    0.60
   8  -7  13    3.70    0.60
   7   8  13    3.50    0.60
   8  -7  13    4.00    0.60
  -7  -8  13    2.40    0.50
   8   8 -13    0.10    0.40
   8  -8 -13    0.30    0.50
   8  -8  13    0.10    0.50
   8   8  13    0.40    0.40
   8  -8  13    0.60    0.40
   8  -8  13    0.70    0.50
   9   8 -13    8.10    0.80
   8  -9 -13    7.60    0.80
   9   8  13    8.70    0.70
   8  -9  13    8.10    0.80
   7  -9 -13    1.30    0.50
   7  -9 -13    1.60    0.50
   9   7 -13    1.20    0.50
   9   7  13    0.50    0.40
   7  -9  13    0.50    0.50
   9   6 -13   13.90    1.10
   6  -9 -13   13.30    1.20
   6  -9 -13   14.20    1.10
   6  -9 -13   14.10    1.10
   9   6  13   14.60    1.00
   6  -9  13   14.90    1.10
   5  -9 -13    1.70    0.60
   9   5 -13    1.10    0.50
   5  -9 -13    1.00    0.70
   5  -9 -13    1.20    0.60
   5  -9  13    1.70    0.50
   9   5  13    1.20    0.50
   9   5  13    1.80    0.50
   5  -9  13    1.40    0.60
   5  -9  13    1.70    0.50
   4  -9 -13   65.19    3.00
   4  -9 -13   60.69    3.30
   9   4 -13   57.09    2.90
   4  -9 -13   58.39    3.10
   9   4 -13   65.09    3.00
   9   4  13   60.99    2.90
   9   4  13   61.39    2.90
   4  -9  13   62.69    3.00
   4  -9  13   60.49    3.80
   3  -9 -13   57.19    2.80
   3  -9 -13   52.79    3.10
   9   3 -13   57.29    2.80
   9   3  13   56.69    2.70
   3  -9  13   56.19    2.70
   3  -9  13   63.49    3.60
   9   3  13   54.99    2.70
   9   2 -13    4.20    0.90
   2  -9 -13    3.10    0.60
   2  -9 -13    3.00    0.90
   9   2 -13    3.70    0.60
   2  -9  13    2.40    0.80
   2  -9  13    3.60    0.60
   9   2  13    3.50    0.50
   9   2  13    3.50    0.60
   9   1 -13   12.20    1.10
   1  -9 -13   10.60    1.00
   9   1 -13    9.50    1.10
   1  -9 -13   10.20    1.30
   9   1  13   14.00    1.00
   9   1  13   14.50    0.90
   1  -9  13   10.80    1.40
   1  -9  13   13.00    1.00
   9   0 -13    0.70    0.50
   0  -9 -13    0.80    0.50
   9   0 -13   -0.20    0.60
   0  -9 -13    0.70    0.50
   0  -9 -13    0.70    0.80
   0  -9  13    0.70    0.70
   9   0  13    0.90    0.50
   0  -9  13    1.00    0.50
   9   0  13    0.80    0.50
  -1  -9 -13   14.40    1.10
   9  -1 -13   11.80    1.00
  -1  -9 -13   13.00    1.40
   9  -1 -13   12.30    1.20
   9  -1  13    9.60    0.90
   9  -1  13   10.20    0.90
  -1  -9  13    9.80    0.90
   9  -1  13   11.60    0.90
  -1  -9  13    8.60    1.20
   9  -1  13    8.90    1.00
   9  -2 -13    3.70    0.80
   9  -2 -13    2.50    0.60
  -2  -9 -13    2.30    0.90
   9  -2  13    2.60    0.60
   9  -2  13    3.70    0.60
  -2  -9  13    3.80    0.90
  -2  -9  13    3.50    0.60
   9  -2  13    3.60    0.60
   9  -2  13    3.90    0.60
   9  -3 -13   60.99    3.20
   9  -3 -13   58.29    2.90
  -3  -9 -13   55.89    3.20
   9  -3  13   55.69    2.70
   9  -3  13   54.59    2.80
  -3  -9  13   57.49    2.70
   9  -3  13   58.69    2.70
  -3  -9  13   54.69    3.60
   9  -3  13   57.29    2.90
   9  -4 -13   66.09    3.10
   9  -4 -13   68.09    3.10
  -4  -9 -13   69.09    3.50
   9  -4 -13   67.49    3.50
  -4  -9  13   62.79    3.90
   4   9  13   60.19    3.00
  -4  -9  13   65.19    3.00
   9  -4  13   60.89    3.10
   9  -4  13   62.79    3.00
   9  -4  13   62.39    3.10
   9  -4  13   57.09    3.00
   9  -5 -13    2.30    0.60
   9  -5 -13    0.10    0.60
  -5  -9 -13    1.70    0.90
   9  -5  13   -0.40    0.40
   5   9  13    0.50    0.50
   9  -5  13    0.60    0.60
   9  -5  13    0.50    0.40
  -5  -9  13    1.80    0.50
   9  -5  13    1.30    0.50
   9  -6 -13   13.50    1.10
  -6  -9 -13   13.70    1.40
   9  -6 -13   13.50    1.30
   9  -6  13   14.80    1.00
  -6  -9  13   13.60    1.00
   9  -6  13   15.50    1.20
   6   9  13   16.00    1.10
   9  -6  13   14.70    1.10
   9  -6  13   15.10    1.00
   9  -7 -13    1.20    0.50
   7   9 -13    1.10    0.50
   9  -7  13    0.50    0.50
   9  -7  13    1.40    0.50
  -7  -9  13    0.60    0.40
   7   9  13    1.10    0.50
   9  -7  13    1.10    0.40
   9  -8 -13    9.40    0.80
   8   9 -13    7.70    0.70
   9  -8  13    8.90    0.80
   9  -8  13    8.40    0.80
   8   9  13    8.30    0.80
   9  -9 -13    1.00    0.40
   9   9 -13    0.20    0.30
   9   9  13    0.60    0.30
   8 -10 -13    0.70    0.40
  10   8  13    1.00    0.30
  10   7 -13   -0.30    0.30
   7 -10 -13    0.50    0.40
   7 -10 -13    0.10    0.40
  10   7  13    0.80    0.40
  10   6 -13    7.30    0.70
   6 -10 -13    8.60    0.90
   6 -10 -13    8.50    0.80
  10   6  13    6.60    0.70
   5 -10 -13   13.70    1.00
  10   5 -13   12.50    0.90
   5 -10 -13   13.70    1.10
  10   5  13   12.90    0.90
  10   5  13   13.40    0.90
   4 -10 -13   19.30    1.20
  10   4 -13   18.00    1.10
  10   4  13   14.90    1.00
  10   4  13   18.20    1.10
   4 -10  13   16.40    1.20
  10   3 -13    5.10    0.70
   3 -10 -13    5.50    0.70
   3 -10 -13    5.30    0.90
   3 -10  13    4.50    0.60
  10   3  13    5.50    0.60
  10   3  13    5.20    0.60
   2 -10 -13   40.40    2.20
   2 -10 -13   38.20    2.40
  10   2 -13   41.20    2.20
  10   2 -13   41.10    2.50
   2 -10  13   40.00    2.10
  10   2  13   43.70    2.10
  10   2  13   42.60    2.00
  10   1 -13   14.90    1.40
   1 -10 -13   13.80    1.10
  10   1 -13   14.50    1.20
   1 -10 -13   11.90    1.30
   1 -10  13   16.70    1.10
  10   1  13   16.20    1.10
   1 -10  13   16.60    1.50
  10   1  13   15.10    1.10
   0 -10 -13    4.50    0.70
   0 -10 -13    4.40    0.90
  10   0 -13    5.70    0.90
  10   0 -13    5.00    0.70
   0 -10  13    4.60    0.60
   0 -10  13    4.20    0.90
  10   0  13    4.80    0.60
  10   0  13    3.80    0.60
  10  -1 -13   15.20    1.20
  10  -1 -13   15.30    1.40
  -1 -10 -13   15.00    1.10
  -1 -10 -13   15.70    1.40
  10  -1  13   13.30    1.00
  -1 -10  13   15.90    1.10
  10  -1  13   12.40    1.00
  -1 -10  13   16.50    1.50
  10  -1  13   15.10    1.10
  10  -2 -13   42.10    2.40
  10  -2 -13   40.60    2.10
  -2 -10 -13   38.80    2.40
  10  -2  13   37.40    2.00
  10  -2  13   40.50    2.00
  -2 -10  13   43.00    2.00
  10  -2  13   38.10    2.10
  10  -2  13   38.00    2.10
  -3 -10 -13    5.10    1.00
  10  -3 -13    4.20    0.80
  10  -3 -13    7.70    0.90
   3  10  13    5.40    0.70
  10  -3  13    4.60    0.60
  10  -3  13    7.40    0.80
  10  -3  13    4.70    0.70
  10  -3  13    4.80    0.60
  -3 -10  13    4.40    0.60
  10  -4 -13   16.40    1.20
  -4 -10 -13   14.80    1.40
  10  -4 -13   15.70    1.40
  10  -4  13   18.20    1.10
  10  -4  13   16.00    1.20
  10  -4  13   16.10    1.10
   4  10  13   20.30    1.20
  -4 -10  13   16.50    1.10
  10  -5 -13   13.30    1.10
  -5 -10  13   15.30    1.00
   5  10  13   14.40    1.00
  10  -5  13   14.90    1.00
  10  -5  13   13.80    1.10
  10  -5  13   14.80    1.00
  10  -6 -13    6.10    0.80
   6  10 -13    7.90    0.80
  10  -6  13   10.60    1.00
  -6 -10  13    8.30    0.70
  10  -6  13    7.80    0.80
  10  -6  13    8.10    0.80
   6  10  13    8.30    0.80
   7  10 -13    0.60    0.40
  10  -7 -13    0.30    0.40
  10  -7  13    0.10    0.40
   7  10  13    0.80    0.40
  10  -7  13    0.30    0.40
   8  10 -13    1.00    0.40
  10  -8 -13    1.00    0.40
  10  -8  13    0.60    0.30
   8  10  13    1.20    0.30
   6 -11 -13    0.70    0.40
   6 -11 -13    0.50    0.40
  11   6  13    0.50    0.30
   5 -11 -13    1.40    0.50
  11   5  13    1.50    0.30
  11   5  13    1.30    0.40
   4 -11 -13    0.60    0.50
  11   4  13    0.70    0.40
  11   4  13    0.20    0.40
  11   3 -13    0.70    0.40
   3 -11 -13    0.20    0.50
  11   3  13    0.00    0.40
  11   3  13    0.20    0.40
  11   2 -13    0.80    0.50
   2 -11 -13    0.70    0.50
  11   2  13    1.40    0.40
   2 -11  13    1.40    0.50
  11   2  13    0.40    0.40
  11   1 -13    2.00    0.60
   1 -11 -13    2.20    0.60
   1 -11  13    2.10    0.50
  11   1  13    3.10    0.50
  11   1  13    3.20    0.50
  11   0 -13    0.20    0.50
  11   0 -13   -0.90    0.60
   0 -11 -13    0.70    0.50
  11   0  13   -0.10    0.40
   0 -11  13   -0.40    0.40
  11   0  13    0.50    0.40
  11  -1 -13    2.10    0.50
  -1 -11 -13    2.50    0.60
  11  -1 -13    2.30    0.70
  11  -1  13    2.40    0.50
  -1 -11  13    2.20    0.50
  11  -1  13    1.70    0.50
  11  -2 -13    0.90    0.50
  11  -2 -13    1.70    0.70
  -2 -11  13    1.30    0.50
   2  11  13    1.70    0.50
  11  -2  13    0.60    0.50
  11  -2  13    1.20    0.40
  11  -3 -13    0.20    0.40
  -3 -11  13    1.10    0.50
  11  -3  13    0.60    0.50
  11  -3  13    0.60    0.40
  11  -3  13    0.50    0.40
   3  11  13    1.30    0.40
  11  -4 -13    0.90    0.50
  11  -4  13   -0.20    0.50
  -4 -11  13    1.10    0.40
   4  11  13    0.10    0.40
  11  -4  13   -0.10    0.40
  11  -4  13    0.70    0.40
  11  -5  13    1.30    0.40
  -5 -11  13    2.00    0.40
  11  -5  13    2.60    0.60
   5  11  13    0.90    0.40
  11  -5  13    1.80    0.40
   6  11 -13    0.10    0.40
   6  11  13    0.10    0.30
  11  -6  13    0.90    0.30
  11  -6  13    0.40    0.30
   7  11  13    1.70    0.30
   4 -12 -13    0.10    0.40
  12   4  13   -0.10    0.30
   3 -12 -13    0.00    0.40
  12   3 -13    0.10    0.40
  12   3  13   -0.10    0.30
  12   2 -13    2.50    0.50
   2 -12 -13    2.50    0.50
   2 -12  13    2.80    0.50
  12   2  13    2.30    0.40
   1 -12 -13    0.70    0.40
  12   1 -13    1.40    0.50
  12   1  13    1.10    0.40
   1 -12  13    1.70    0.40
   0 -12 -13   11.80    0.90
  12   0 -13   12.80    1.00
   0 -12  13   11.90    0.90
  12   0  13   12.30    0.80
  12  -1 -13    1.00    0.50
  -1 -12  13    0.70    0.40
  12  -1  13    1.10    0.40
  12  -2 -13    3.10    0.50
  12  -2  13    3.00    0.50
  -2 -12  13    1.60    0.50
  12  -2  13    2.90    0.40
  12  -3 -13    0.40    0.40
  12  -3  13    0.80    0.40
  12  -3  13    0.20    0.30
   3  12  13    0.00    0.30
  -3 -12  13    0.50    0.40
  12  -4 -13    0.50    0.40
   4  12  13    0.00    0.30
  12  -4  13    1.50    0.50
  12  -4  13    0.30    0.30
   5  12  13    0.90    0.30
  13   0 -13    0.00    0.30
  13  -1 -13    0.30    0.30
   1   0 -14   14.30    1.10
   0   1 -14   12.20    1.20
   1   0  14   14.50    1.20
   1   1 -14   37.70    2.30
  -1   1  14   34.70    2.30
   1   1  14   40.50    2.50
   2   1 -14   56.19    3.40
  -1   2 -14   54.69    3.40
  -1   2  14   64.19    3.60
   2   1  14   64.99    3.80
   2   0 -14 1966.60   95.29
   0   2 -14 1945.91   95.39
   2   0  14 1842.72  106.89
   0   2  14 1931.81  106.79
   1   2 -14   64.69    3.50
   1   2  14   58.79    3.80
   2   2 -14  207.28   10.50
   2   2  14  197.48   11.70
   3   2 -14 1047.10   51.29
   2  -3 -14 1024.90   45.60
  -2   3 -14 1031.60   51.19
   3   2  14 1043.00   57.49
   2  -3  14  990.70   53.99
  -1   3 -14  270.17   13.80
   3   1 -14  279.67   13.80
   1  -3  14  253.87   14.30
  -1   3  14  265.67   15.30
   3   1  14  285.07   15.50
   3   0 -14  152.28    7.60
   0   3 -14  152.98    7.70
   0   3  14  147.69    8.50
   3   0  14  136.09    8.60
   0  -3  14  143.79    7.90
   1   3 -14  279.37   13.80
   1   3  14  261.37   15.40
   3  -2 -14 1030.90   46.20
   2   3 -14 1087.99   51.99
   2   3  14 1004.20   58.19
   3  -3 -14   73.39    3.60
   3  -3 -14   63.79    3.50
   3   3 -14   70.19    4.00
   3   3  14   72.29    4.50
   3  -4 -14   66.29    3.70
   4   3 -14   63.59    4.10
   3  -4 -14   71.89    3.50
  -3   4 -14   61.49    4.10
   4   3  14   86.59    4.80
   3  -4  14   74.29    4.00
   2  -4 -14  211.38    9.40
   4   2 -14  208.78   10.50
   2  -4 -14  202.08    9.30
  -2   4 -14  204.48   10.50
   2  -4  14  183.98   10.70
   4   2  14  197.88   11.70
  -1   4 -14   89.89    5.00
   4   1 -14   91.29    5.00
   1  -4 -14   91.79    4.50
   4   1  14   95.49    5.60
   1  -4  14   87.09    5.00
   0   4 -14  462.55   22.50
   0  -4 -14  454.65   20.00
   4   0 -14  425.76   22.30
   4   0 -14  430.96   19.80
   0  -4  14  450.15   23.40
   4   0  14  456.25   25.10
   0   4  14  424.76   25.00
   4  -1 -14   86.39    4.30
   1   4 -14   88.19    4.90
  -1  -4  14   87.39    4.90
   1   4  14   90.19    5.40
   4  -2 -14  186.08    8.90
   4  -2 -14  191.28    8.90
   2   4 -14  193.38   10.10
   2   4  14  197.38   11.30
   3   4 -14   74.79    4.50
   4  -3 -14   85.29    3.90
   4  -3 -14   81.69    4.00
   3   4  14   70.99    5.00
   4  -4 -14  539.75   24.60
  -4   4 -14  561.04   27.50
   4   4 -14  552.34   27.50
   4  -4 -14  533.75   24.50
   4  -4  14  529.15   28.70
   4   4  14  544.35   30.90
   5   4 -14  394.16   19.50
   4  -5 -14  372.16   17.30
   4  -5  14  375.16   20.10
   5   4  14  368.46   21.70
   3  -5 -14  236.68   10.90
   3  -5 -14  242.28   10.90
   5   3 -14  214.98   12.20
   5   3  14  243.58   13.80
   3  -5  14  232.38   12.60
   5   2 -14  307.57   15.30
   2  -5 -14  299.07   13.60
   2  -5 -14  300.97   13.60
  -2   5 -14  320.97   15.30
   2  -5  14  267.07   15.80
   5   2  14  289.07   17.10
   5   1 -14  144.49    6.60
   1  -5 -14  141.39    6.80
  -1   5 -14  142.99    7.60
   1  -5 -14  137.19    6.70
   5   1 -14  138.29    7.50
   5   1  14  138.39    8.50
   1  -5  14  148.19    7.70
   5   0 -14  103.79    4.90
   0  -5 -14  105.49    5.10
   0   5 -14  105.59    5.70
   0  -5 -14  102.49    5.00
   5   0  14  107.29    6.40
   0   5  14   98.19    6.30
   0  -5  14  101.79    5.70
   5  -1 -14  146.09    6.70
   5  -1 -14  134.39    6.60
  -1  -5 -14  141.09    6.70
   1   5 -14  151.58    7.70
  -1  -5 -14  137.69    6.70
  -1  -5  14  146.49    7.70
   1   5  14  134.89    8.50
   5  -2 -14  289.47   13.30
   2   5 -14  290.27   15.00
   5  -2 -14  276.27   13.30
  -2  -5 -14  284.17   13.30
   2   5  14  306.57   16.80
  -2  -5  14  294.57   15.50
   5  -3 -14  247.68   11.10
   3   5 -14  221.78   12.40
   5  -3 -14  245.38   11.00
   3   5  14  238.28   14.00
   4   5 -14  358.56   19.50
   5  -4 -14  393.26   17.40
   5  -4 -14  382.36   17.40
   4   5  14  385.76   22.00
   5   5 -14    6.20    1.20
   5  -5 -14    8.90    1.00
   5  -5  14    6.80    1.00
   5  -6 -14   54.19    3.10
   6   5 -14   54.19    3.70
  -6  -5  14   57.59    2.70
   5  -6  14   58.49    3.50
   6   4 -14   71.49    4.20
   4  -6 -14   62.09    3.40
   4  -6  14   65.59    3.90
   6   3 -14   80.69    4.90
   3  -6 -14   83.89    4.20
   6   3  14   81.49    5.40
   3  -6  14   83.89    4.70
   2  -6 -14  117.89    5.80
   6   2 -14  117.39    5.50
   2  -6 -14  118.59    5.60
   6   2 -14  117.89    6.50
   6   2  14  115.79    7.20
   2  -6  14  109.09    6.40
   1  -6 -14  111.79    5.30
   6   1 -14  109.39    6.00
   6   1 -14  107.19    5.20
   1  -6 -14  108.49    5.40
   6   1  14  115.69    6.80
   1  -6  14  104.89    6.10
   0  -6 -14    8.80    1.10
   0  -6 -14    7.60    1.00
   6   0 -14    8.30    0.80
   0   6 -14    9.50    1.20
   0  -6  14    7.40    0.90
   0   6  14    9.20    1.40
   6  -1 -14  115.29    5.40
   1   6 -14  111.29    6.20
  -1  -6 -14  115.99    5.50
  -1  -6  14  105.99    6.20
   1   6  14  114.39    7.00
   2   6 -14  111.09    6.40
   6  -2 -14  117.89    5.60
  -2  -6 -14  122.89    5.60
  -2  -6  14  106.99    6.40
   2   6  14  123.89    7.30
  -3  -6 -14   86.09    4.20
   6  -3 -14   89.69    4.20
   6  -3 -14   91.89    4.40
   3   6 -14   79.59    4.90
  -3  -6  14   78.29    4.80
   3   6  14   74.39    5.50
   4   6 -14   65.09    4.10
   6  -4 -14   64.29    3.40
   6  -5 -14   58.79    3.10
   5   6 -14   58.99    3.80
  -5  -6  14   55.39    2.70
   6  -6 -14    6.70    0.80
   6  -6 -14    6.60    1.00
   6   6 -14    8.80    1.50
  -6  -6  14    7.80    0.90
   6  -6  14    6.60    0.70
   6   6  14    7.30    0.90
   6  -6  14    6.90    1.10
   6  -6  14    7.20    0.90
   6  -6  14    7.80    0.90
   6  -6  14    7.30    0.70
   7   6 -14    4.20    1.20
   6  -7 -14    5.40    0.70
   6  -7 -14    5.70    0.80
   6  -7 -14    4.90    0.90
   7   6 -14    4.60    0.70
   6  -7  14    3.60    0.60
   6  -7  14    5.00    0.70
   6  -7  14    5.80    1.00
  -7  -6  14    6.40    0.80
   6  -7  14    4.10    0.60
   7   6  14    5.60    0.70
   5  -7 -14   54.79    3.10
   7   5 -14   60.09    4.00
   5  -7 -14   51.59    2.90
   5  -7 -14   55.49    2.80
   7   5 -14   54.19    2.80
  -7  -5  14   58.19    2.70
   5  -7  14   57.49    2.80
   5  -7  14   60.89    2.80
   7   5  14   56.59    2.80
   5  -7  14   62.79    3.60
   5  -7  14   57.99    2.80
   5  -7  14   58.49    2.90
   4  -7 -14   11.70    1.00
   4  -7 -14   12.00    1.20
   7   4 -14   10.40    1.60
   4  -7  14   11.80    1.00
   4  -7  14   10.70    1.30
  -7  -4  14   10.80    0.90
   4  -7  14   11.80    1.00
   7   3 -14   10.90    1.60
   3  -7 -14    9.70    1.10
  -7  -3  14   11.20    0.90
   3  -7  14   10.00    1.20
   7   2 -14    9.30    1.00
   7   2 -14   10.80    1.50
   2  -7 -14    9.30    1.10
   2  -7  14   10.40    1.10
   1  -7 -14   48.60    2.70
   7   1 -14   47.90    2.60
   1  -7  14   53.19    3.00
   7   1  14   42.20    3.40
   7   0 -14    8.70    1.00
   0  -7 -14   10.00    1.10
   0  -7  14    8.10    1.10
  -1  -7 -14   48.90    2.70
   1   7 -14   47.10    3.20
   7  -1 -14   50.69    2.60
  -1  -7  14   46.60    3.00
  -2  -7 -14   10.40    1.20
   7  -2 -14   11.20    1.10
   2   7 -14    8.30    1.30
  -2  -7  14    9.70    0.90
  -2  -7  14   10.30    1.10
   7  -3 -14   11.00    1.20
  -3  -7 -14   11.20    1.20
   3   7 -14   10.90    1.60
  -3  -7  14   10.40    0.90
  -3  -7  14   11.10    1.20
   4   7 -14    8.90    1.50
  -4  -7 -14   10.90    1.30
   7  -4 -14   11.80    1.20
  -4  -7  14   12.10    1.40
  -4  -7  14   12.10    1.00
   7  -4  14   10.60    0.90
   7  -5 -14   55.29    2.90
   5   7 -14   61.39    3.90
   7  -5 -14   54.69    3.10
   7  -5  14   60.09    2.90
  -5  -7  14   60.19    3.70
   7  -5  14   58.39    2.70
   5   7  14   52.69    2.80
  -5  -7  14   56.39    2.80
   7  -5  14   56.29    2.70
   7  -5  14   59.69    2.90
   6   7 -14    4.20    1.20
   7  -6 -14    6.10    1.00
   7  -6 -14    4.60    0.70
   7  -6  14    5.20    0.60
  -6  -7  14    3.80    0.60
   7  -6  14    4.70    0.60
   7  -6  14    4.20    0.80
  -6  -7  14    5.20    1.10
   6   7  14    5.20    0.70
   7  -6  14    3.90    0.60
   7  -7 -14    2.20    0.80
   7  -7 -14    2.00    0.60
   7   7 -14    2.80    0.60
   7  -7  14    1.80    0.50
  -7  -7  14    1.80    0.90
   7  -7  14    3.40    0.60
  -7  -7  14    3.30    0.60
   7  -7  14    2.40    0.60
   7   7  14    3.80    0.60
   7  -8 -14    1.80    0.60
   7  -8 -14    2.90    0.70
   8   7 -14    1.60    0.50
   7  -8  14    2.70    0.60
   7  -8  14    2.30    0.50
   8   7  14    2.60    0.50
   7  -8  14    1.80    0.50
   6  -8 -14   21.30    1.40
   8   6 -14   19.20    1.30
   6  -8 -14   21.10    1.60
   6  -8 -14   21.50    1.30
   8   6  14   20.80    1.30
   6  -8  14   21.30    1.30
   6  -8  14   22.30    1.40
   6  -8  14   20.90    1.40
   5  -8 -14    0.50    0.70
   5  -8 -14    0.20    0.60
   5  -8 -14    1.60    0.60
   8   5 -14    1.10    0.50
   8   5  14    0.20    0.50
   5  -8  14    1.80    0.60
   5  -8  14    0.40    0.50
   5  -8  14    0.90    0.70
   5  -8  14    0.00    0.50
   5  -8  14    1.40    0.50
   8   4 -14    6.20    1.30
   4  -8 -14    6.00    0.70
   8   4 -14    5.10    0.70
   4  -8 -14    6.30    0.80
   4  -8 -14    5.30    1.00
   4  -8  14    6.70    0.70
   4  -8  14    5.90    0.70
   4  -8  14    4.40    0.90
   8   4  14    6.30    0.70
   3  -8 -14   47.40    2.40
   8   3 -14   44.90    3.30
   8   3 -14   49.00    2.40
   3  -8 -14   47.10    2.70
   8   3 -14   44.20    2.60
   8   3  14   45.20    2.30
   3  -8  14   51.09    3.10
   3  -8  14   51.29    2.40
  -8  -3  14   46.50    2.40
   3  -8  14   44.80    2.30
   8   2 -14   15.80    1.30
   2  -8 -14   14.40    1.30
   8   2 -14   16.20    1.10
   2  -8 -14   17.80    1.20
   2  -8  14   16.30    1.40
  -8  -2  14   13.40    1.10
   8   2  14   15.50    1.00
   2  -8  14   14.00    1.00
   1  -8 -14   70.09    3.10
   1  -8 -14   65.29    3.50
   8   1 -14   59.69    3.40
   1  -8  14   66.69    3.90
   1  -8  14   63.39    3.00
   8   1  14   65.49    3.00
  -8  -1  14   66.69    3.10
   0  -8 -14   58.89    2.80
   0  -8 -14   55.89    3.20
   8   0 -14   59.59    3.20
   0  -8 -14   58.29    2.90
   0  -8  14   62.89    3.60
   8   0  14   58.19    2.80
   0  -8  14   62.49    2.80
   8  -1 -14   72.29    3.60
  -1  -8 -14   68.19    3.60
  -1  -8 -14   69.19    3.20
  -1  -8  14   67.69    3.20
   8  -1  14   65.79    3.10
  -1  -8  14   66.39    4.10
   8  -2 -14   12.20    1.10
  -2  -8 -14   13.60    1.10
  -2  -8 -14   13.10    1.40
   8  -2 -14   12.60    1.30
   8  -2  14   14.90    1.10
   8  -2  14   16.50    1.10
  -2  -8  14   17.30    1.10
  -2  -8  14   17.00    1.50
   8  -3 -14   44.60    2.40
  -3  -8 -14   46.30    2.70
   8  -3 -14   42.70    2.40
   3   8 -14   45.40    3.30
   8  -3 -14   47.10    2.70
   8  -3  14   46.70    2.30
   8  -3  14   45.10    2.40
   8  -3  14   50.19    2.50
   8  -3  14   47.70    2.30
  -3  -8  14   50.89    2.40
  -3  -8  14   49.60    3.10
   8  -4 -14    6.20    0.70
   4   8 -14    4.70    1.20
  -4  -8 -14    5.00    1.00
   8  -4 -14    5.80    1.00
   8  -4  14    6.90    0.70
   8  -4  14    5.50    0.70
   8  -4  14    5.20    0.70
  -4  -8  14    7.00    1.10
   8  -4  14    6.10    0.70
   4   8  14    7.00    0.80
  -4  -8  14    5.80    0.70
  -5  -8 -14    0.70    0.90
   8  -5 -14    0.50    0.50
   8  -5 -14    0.30    0.70
  -5  -8  14    0.40    0.50
  -5  -8  14    0.90    0.80
   8  -5  14    1.10    0.50
   8  -5  14    1.30    0.60
   5   8  14    1.00    0.50
   8  -5  14    1.20    0.50
   8  -5  14    0.90    0.50
   8  -6 -14   21.40    1.40
   8  -6 -14   21.60    1.60
  -6  -8 -14   23.10    1.80
   6   8  14   20.20    1.30
   8  -6  14   20.10    1.50
   8  -6  14   21.20    1.40
   8  -6  14   20.80    1.30
   8  -6  14   21.60    1.30
  -6  -8  14   20.00    1.30
  -6  -8  14   21.30    1.90
   7   8 -14    1.30    0.50
   8  -7 -14    1.20    0.70
   8  -7 -14    3.00    0.60
  -7  -8 -14    1.90    0.90
   8  -7  14    2.20    0.50
   7   8  14    1.70    0.50
   8  -7  14    2.60    0.50
  -7  -8  14    1.60    0.50
   8  -7  14    2.70    0.50
   8   8 -14    0.40    0.40
   8  -8 -14   -0.10    0.40
   8  -8  14   -0.10    0.40
   8  -8  14    0.10    0.50
   8   8  14    0.20    0.40
   8  -8  14    0.40    0.50
   8  -9 -14    0.20    0.40
   9   8 -14    0.30    0.40
   8  -9  14    0.30    0.40
   9   8  14    0.70    0.40
   7  -9 -14    4.30    0.60
   9   7 -14    4.30    0.60
   7  -9 -14    4.30    0.60
   9   7  14    5.80    0.70
   7  -9  14    4.80    0.60
   6  -9 -14    3.00    0.60
   6  -9 -14    3.00    0.60
   6  -9 -14    2.70    0.70
   9   6 -14    3.00    0.60
   6  -9  14    3.10    0.60
   6  -9  14    2.30    0.50
   9   6  14    3.70    0.50
   9   5 -14    9.10    1.00
   5  -9 -14   10.00    1.00
   5  -9 -14   10.30    1.20
   5  -9 -14   11.80    1.00
   5  -9  14   12.10    1.00
   9   5  14   11.60    0.90
   4  -9 -14    6.60    0.80
   4  -9 -14    7.40    1.10
   9   4 -14    7.30    0.90
   4  -9 -14    8.50    1.00
   9   4  14    7.60    0.80
   4  -9  14    4.80    1.00
   4  -9  14    8.20    0.90
   9   3 -14    2.70    0.60
   3  -9 -14    2.40    0.60
   3  -9 -14    2.60    0.80
   9   3  14    2.50    0.50
   3  -9  14    2.80    0.60
   9   3  14    2.40    0.50
   3  -9  14    1.80    0.80
   9   2 -14   51.89    2.60
   9   2 -14   50.69    2.90
   2  -9 -14   50.99    2.90
   2  -9  14   48.40    2.50
   9   2  14   53.69    2.50
   9   2  14   52.19    2.50
   2  -9  14   51.59    3.30
   9   1 -14   14.10    1.10
   1  -9 -14   13.50    1.10
   1  -9 -14   11.20    1.30
   9   1 -14   14.30    1.20
   9   1  14   12.20    0.90
   1  -9  14   13.50    1.40
   1  -9  14   11.80    0.90
   9   1  14   12.10    1.00
   9   0 -14    6.00    0.70
   9   0 -14    5.00    0.90
   0  -9 -14    5.70    1.10
   0  -9 -14    4.60    0.70
   0  -9  14    7.10    0.80
   9   0  14    6.60    0.80
   9   0  14    6.30    0.80
   0  -9  14    6.00    1.00
   9  -1 -14   10.60    1.00
  -1  -9 -14   11.50    1.30
   9  -1 -14   10.80    1.20
  -1  -9 -14   10.40    1.00
  -1  -9  14   12.10    1.00
   9  -1  14   11.60    1.00
   9  -1  14   12.40    0.90
  -1  -9  14   13.20    1.40
   9  -1  14   11.60    1.00
   9  -1  14   12.80    0.90
  -2  -9 -14   52.89    3.00
   9  -2 -14   55.19    3.00
   9  -2 -14   53.19    2.60
  -2  -9 -14   49.20    2.60
   9  -2  14   52.39    2.50
   9  -2  14   51.59    2.70
  -2  -9  14   53.39    2.50
  -2  -9  14   55.09    3.40
   9  -2  14   51.19    2.60
   9  -2  14   49.80    2.50
   9  -3 -14    2.40    0.60
   9  -3 -14    4.20    0.90
  -3  -9 -14    3.90    1.00
   3   9  14    2.90    0.60
   9  -3  14    1.80    0.50
  -3  -9  14    2.40    0.80
  -3  -9  14    2.30    0.60
   9  -3  14    2.40    0.50
   9  -3  14    2.60    0.60
   9  -3  14    2.30    0.50
   9  -4 -14    5.90    0.70
   9  -4 -14    5.60    1.00
   9  -4 -14    5.30    0.70
  -4  -9 -14    4.40    1.00
   9  -4  14    6.70    0.90
   4   9  14    8.10    0.90
  -4  -9  14    7.70    0.90
  -4  -9  14    6.40    1.10
   9  -4  14    8.00    0.80
   9  -4  14    7.50    1.00
   9  -4  14    7.90    0.80
   9  -5 -14   12.40    1.10
  -5  -9 -14   10.30    1.40
   9  -5 -14   11.90    1.30
   5   9  14   10.10    1.00
   9  -5  14   11.70    1.00
   9  -5  14   12.60    1.10
   9  -5  14   11.60    0.90
   9  -5  14   11.40    1.00
  -5  -9  14   10.30    1.00
   9  -6 -14    3.10    0.60
   9  -6 -14    3.90    0.80
  -6  -9 -14    1.70    0.80
   9  -6  14    3.80    0.60
   9  -6  14    3.30    0.50
   9  -6  14    3.30    0.50
   9  -6  14    3.00    0.70
   6   9  14    3.70    0.60
  -6  -9  14    2.90    0.50
   9  -7 -14    3.80    0.60
   7   9 -14    4.70    0.60
   7   9  14    3.50    0.50
   9  -7  14    4.30    0.60
  -7  -9  14    4.60    0.50
   9  -7  14    3.90    0.50
   9  -7  14    4.50    0.50
   9  -8 -14    0.20    0.40
   8   9 -14    0.60    0.40
   9  -8  14    0.10    0.40
   8   9  14   -0.30    0.40
   9  -8  14    1.10    0.50
   9  -9 -14    1.90    0.40
   9   9  14    2.40    0.40
   8 -10 -14    2.10    0.40
  10   8  14    2.10    0.30
   7 -10 -14    2.20    0.50
   7 -10 -14    2.90    0.50
  10   7 -14    2.20    0.40
  10   7  14    2.40    0.40
   6 -10 -14    7.90    0.80
   6 -10 -14    8.40    0.90
  10   6 -14    6.00    0.70
  10   6  14    6.70    0.70
   5 -10 -14    2.50    0.50
   5 -10 -14    3.40    0.60
  10   5  14    2.30    0.50
   4 -10 -14    5.40    0.70
   4 -10 -14    4.40    0.80
  10   4 -14    4.80    0.60
  10   4  14    4.20    0.50
  10   4  14    3.70    0.50
   3 -10 -14    1.20    0.50
   3 -10 -14    0.80    0.70
  10   3 -14    2.10    0.50
  10   3  14    1.40    0.50
  10   3  14    2.10    0.50
  10   2 -14   25.80    1.90
   2 -10 -14   25.00    1.80
   2 -10 -14   26.10    1.60
  10   2 -14   27.60    1.60
  10   2  14   28.00    1.50
   2 -10  14   26.30    1.50
  10   2  14   26.10    1.40
   1 -10 -14    3.00    0.80
  10   1 -14    2.80    0.80
   1 -10 -14    2.80    0.60
  10   1 -14    3.30    0.60
   1 -10  14    2.20    0.50
  10   1  14    3.00    0.50
  10   1  14    3.30    0.50
   0 -10 -14   -0.20    0.50
  10   0 -14    0.30    0.50
  10   0 -14    0.00    0.60
   0 -10 -14    1.90    0.80
  10   0  14    0.00    0.40
   0 -10  14    0.50    0.70
  10   0  14    1.20    0.40
   0 -10  14    0.50    0.50
  -1 -10 -14    2.30    0.60
  -1 -10 -14    1.50    0.80
  10  -1 -14    2.50    0.60
  10  -1 -14    2.50    0.80
  10  -1  14    3.10    0.50
  10  -1  14    3.20    0.60
  -1 -10  14    2.80    0.60
  10  -1  14    2.60    0.50
  10  -2 -14   25.90    1.80
  10  -2 -14   28.00    1.60
  -2 -10 -14   25.30    1.80
  -2 -10  14   26.40    1.50
  10  -2  14   25.20    1.40
  10  -2  14   25.30    1.50
  10  -2  14   24.10    1.40
  10  -2  14   25.40    1.50
  10  -3 -14    2.00    0.60
  10  -3 -14    2.60    0.70
  -3 -10 -14    1.30    0.80
  -3 -10  14    0.70    0.50
  10  -3  14    0.60    0.40
  10  -3  14    1.10    0.50
  10  -3  14    1.00    0.50
  10  -3  14    1.20    0.40
   3  10  14    1.50    0.50
  -4 -10 -14    3.50    0.80
  10  -4 -14    2.90    0.80
  10  -4 -14    4.20    0.60
   4  10  14    5.10    0.60
  -4 -10  14    3.80    0.60
  10  -4  14    4.50    0.60
  10  -4  14    4.60    0.50
  10  -4  14    4.60    0.70
  10  -4  14    4.30    0.60
  10  -5 -14    2.50    0.50
  10  -5  14    2.60    0.50
  10  -5  14    3.00    0.60
  10  -5  14    3.40    0.50
  10  -5  14    2.40    0.50
   5  10  14    1.60    0.50
  -5 -10  14    2.60    0.50
  10  -6 -14    7.80    0.80
   6  10 -14    7.80    0.80
   6  10  14    7.10    0.80
  10  -6  14    7.20    0.80
  -6 -10  14    7.70    0.70
  10  -6  14    7.60    0.70
  10  -7 -14    2.10    0.50
   7  10 -14    1.20    0.40
  10  -7  14    2.00    0.40
   7  10  14    1.80    0.40
  10  -7  14    1.50    0.40
  10  -8 -14    1.80    0.40
   8  10  14    2.10    0.30
   6 -11 -14    1.60    0.40
   6 -11 -14    1.80    0.40
  11   6  14    1.70    0.30
   5 -11 -14    0.10    0.40
  11   5  14    0.80    0.30
   4 -11 -14   13.40    1.00
  11   4 -14   11.00    0.90
  11   4  14   11.10    0.80
  11   4  14   10.90    0.80
  11   3 -14   10.50    0.90
   3 -11 -14   10.60    0.90
  11   3  14    8.70    0.70
  11   3  14    9.30    0.80
  11   2 -14    0.80    0.50
   2 -11 -14    0.40    0.50
  11   2  14    1.00    0.40
   2 -11  14    0.90    0.40
  11   2  14    0.60    0.40
   1 -11 -14    9.90    1.00
  11   1 -14   11.00    1.00
   1 -11  14   13.00    1.00
  11   1  14   13.50    0.90
  11   1  14   11.80    0.90
  11   0 -14    6.50    0.90
   0 -11 -14    6.80    0.90
  11   0 -14    6.80    1.00
   0 -11  14    6.40    0.80
  11   0  14    7.10    0.70
  11   0  14    6.80    0.70
  11  -1 -14   10.70    1.00
  11  -1 -14   11.90    1.20
  -1 -11 -14   13.00    1.00
  11  -1  14   10.60    1.00
  11  -1  14   11.30    0.90
  11  -1  14   11.30    0.90
  -1 -11  14   11.10    0.90
  11  -2 -14    0.80    0.50
  11  -2  14   -0.30    0.40
  -2 -11  14    0.00    0.40
  11  -2  14    0.80    0.40
  11  -3 -14    9.40    0.90
  -3 -11  14   11.60    0.90
   3  11  14   10.00    0.80
  11  -3  14    8.90    0.80
  11  -3  14    9.50    0.80
  11  -3  14    9.20    0.90
  11  -4 -14   11.40    0.90
   4  11  14   11.10    0.90
  11  -4  14   12.00    0.80
  11  -4  14   10.60    1.00
  11  -4  14   13.20    0.90
  -4 -11  14   13.30    0.90
  11  -5  14    0.70    0.40
  11  -5  14    0.80    0.40
   5  11  14    1.80    0.40
  -5 -11  14    0.90    0.40
   6  11 -14    1.50    0.40
   6  11  14    1.30    0.40
  11  -6  14    1.80    0.40
  11  -6  14    2.30    0.40
   7  11  14    1.20    0.30
   4 -12 -14    1.20    0.40
   3 -12 -14   -0.40    0.40
  12   3 -14   -0.40    0.40
  12   3  14    0.60    0.30
   2 -12 -14    9.10    0.80
  12   2 -14    8.80    0.80
  12   2  14    7.90    0.60
   2 -12  14    8.90    0.70
  12   1 -14    0.80    0.50
   1 -12 -14    1.00    0.40
  12   1  14    0.60    0.40
   1 -12  14    0.10    0.40
   0 -12 -14    0.90    0.50
  12   0 -14    0.40    0.40
   0 -12  14    0.10    0.40
  12   0  14    0.30    0.30
  12  -1 -14    0.90    0.50
  12  -1  14    0.40    0.30
  -1 -12  14    0.90    0.40
  12  -2 -14    8.40    0.80
  12  -2  14    9.90    0.70
  -2 -12  14   10.00    0.80
  12  -2  14    8.50    0.80
  12  -3 -14   -0.30    0.40
  -3 -12  14    0.10    0.40
   3  12  14    0.30    0.30
  12  -3  14   -0.50    0.50
  12  -3  14   -0.20    0.30
  12  -4 -14    1.00    0.40
  12  -4  14    1.10    0.30
   4  12  14    1.60    0.30
   0   0 -15    1.10    0.60
   0   1 -15  584.34   28.70
   1   0 -15  567.14   28.60
   0   1  15  577.74   32.00
   1   0  15  556.44   32.00
   1  -1 -15  196.48    9.80
   1   1 -15  178.38    9.80
   1   1  15  197.88   10.90
  -1   1  15  189.58   10.80
   2   1 -15  458.75   23.40
  -1   2 -15  450.65   23.40
  -1   2  15  484.95   26.00
   2   1  15  461.95   26.20
   2   0 -15  111.39    5.70
   0   2 -15  113.59    5.80
   2   0  15   97.79    6.30
   0   2  15  104.69    6.30
   1   2 -15  476.35   23.70
   2  -1 -15  467.95   23.50
   1   2  15  464.45   26.40
   2   2 -15  392.26   19.30
   2   2  15  371.16   21.60
   2  -3 -15  176.58    8.30
  -2   3 -15  189.38    9.40
   3   2 -15  164.58    9.30
   3   2  15  184.68   10.50
  -1   3 -15  248.98   12.40
   3   1 -15  255.07   12.40
   3   1  15  226.28   13.80
   1  -3  15  232.78   12.80
   3   0 -15  474.45   23.40
   0   3 -15  470.95   23.40
   0  -3  15  454.25   24.50
   3   0  15  464.85   26.20
   0   3  15  458.45   26.10
   1   3 -15  236.08   12.20
   1   3  15  235.58   13.60
   2   3 -15  170.38    8.90
   3  -2 -15  169.18    7.90
   2   3  15  170.08   10.00
   3  -3 -15  519.95   22.70
   3   3 -15  483.55   25.40
   3  -3 -15  500.75   22.80
   3   3  15  510.35   28.50
   3  -4 -15  745.93   32.70
   3  -4 -15  743.43   32.40
  -3   4 -15  740.33   36.40
   4   3 -15  708.13   36.40
   3  -4  15  676.63   38.20
   4   3  15  732.83   40.80
  -2   4 -15  264.27   13.50
   2  -4 -15  279.17   12.10
   4   2 -15  267.87   13.50
   2  -4 -15  256.57   12.00
   2  -4  15  239.28   13.90
   4   2  15  265.77   15.10
  -1   4 -15  685.73   33.90
   1  -4 -15  704.23   30.20
   4   1 -15  674.83   33.80
   1  -4 -15  669.43   30.40
   1  -4  15  646.84   35.50
   4   1  15  666.83   37.90
   0  -4 -15   22.40    1.40
   4   0 -15   22.80    1.50
   0  -4 -15   21.20    1.60
   4   0 -15   22.10    1.60
   0   4 -15   22.50    1.80
   4   0  15   24.80    1.90
   0   4  15   22.40    1.80
   0  -4  15   25.00    1.50
  -1  -4 -15  634.64   29.60
   1   4 -15  649.93   33.00
   4  -1 -15  616.24   29.20
   1   4  15  676.73   36.90
  -1  -4  15  701.33   34.60
   2   4 -15  256.37   13.20
   4  -2 -15  247.38   11.60
   4  -2 -15  240.78   11.60
   2   4  15  273.37   14.70
   3   4 -15  702.13   36.30
   4  -3 -15  707.13   32.60
   4  -3 -15  720.63   32.30
   3   4  15  755.82   40.70
   4   4 -15  376.76   20.00
   4  -4 -15  409.16   17.80
   4  -4 -15  396.86   17.80
  -4   4 -15  384.36   19.90
   4   4  15  379.96   22.40
   4  -5 -15   60.99    3.20
   5   4 -15   68.69    4.00
   5   4  15   54.99    4.30
   4  -5  15   63.69    3.60
   3  -5 -15   81.29    4.30
   5   3 -15   83.79    4.80
   3  -5 -15   87.69    4.10
   5   3  15   74.49    5.30
   3  -5  15   79.59    4.60
   2  -5 -15    8.20    1.10
  -2   5 -15    9.50    1.20
   2  -5 -15    7.70    0.90
   5   2 -15    8.30    1.20
   2  -5  15    7.00    0.90
   5   2  15    8.40    1.30
   5   1 -15   49.20    2.50
   1  -5 -15   47.70    2.70
   5   1 -15   48.50    3.00
  -1   5 -15   51.19    3.10
   1  -5 -15   49.60    2.60
   5   1  15   47.00    3.30
   1  -5  15   44.30    2.80
   0  -5 -15   13.00    1.10
   0   5 -15   13.10    1.30
   0  -5 -15   14.00    1.30
   5   0 -15   13.40    1.00
   0  -5  15   13.00    1.10
   0   5  15   11.50    1.40
   5   0  15   12.70    1.50
  -1  -5 -15   39.50    2.30
   1   5 -15   42.60    2.80
  -1  -5 -15   47.50    2.50
   5  -1 -15   43.50    2.30
   1   5  15   47.70    3.20
  -1  -5  15   43.90    2.60
   5  -2 -15    6.80    0.90
  -2  -5 -15    7.70    1.00
   2   5 -15    7.90    1.20
   5  -2 -15    6.70    0.90
   2   5  15   10.30    1.40
  -2  -5  15   10.20    0.90
   3   5 -15   77.29    4.90
   5  -3 -15   83.79    4.30
   5  -3 -15   85.39    4.20
   3   5  15   88.49    5.50
   4   5 -15   59.79    3.80
   5  -4 -15   57.99    3.30
   5  -4 -15   57.19    3.10
   4   5  15   61.39    4.20
   5  -5 -15   90.39    4.60
   5   5 -15   95.89    5.50
   5  -6 -15    4.20    0.80
   6   5 -15    4.60    1.20
   5  -6  15    5.60    0.60
   5  -6  15    4.70    0.90
  -6  -5  15    5.60    0.70
   5  -6  15    5.00    0.70
   4  -6 -15  115.59    6.00
   6   4 -15  129.49    7.10
  -6  -4  15  125.19    5.50
   4  -6  15  128.89    7.00
   6   3 -15   74.39    4.70
   3  -6 -15   78.69    4.00
   6   3  15   75.69    5.20
   3  -6  15   83.79    4.50
   6   2 -15   50.59    2.60
   2  -6 -15   47.90    2.90
   6   2 -15   48.20    3.20
   2  -6 -15   50.79    2.70
   2  -6  15   44.10    2.90
   6   2  15   51.29    3.50
  -1   6 -15   38.00    2.60
   6   1 -15   36.90    2.60
   1  -6 -15   39.70    2.40
   6   1 -15   38.10    2.10
   1  -6 -15   42.30    2.20
   1  -6  15   35.70    2.40
   6   1  15   35.30    2.80
   6   0 -15   68.59    3.40
   0  -6 -15   70.09    3.50
   0  -6 -15   66.69    3.60
   0   6 -15   64.39    4.00
   0   6  15   70.69    4.60
   0  -6  15   65.29    3.90
   6  -1 -15   38.10    2.10
  -1  -6 -15   37.20    2.20
   1   6 -15   37.40    2.60
   1   6  15   38.60    2.90
  -1  -6  15   37.80    2.40
   6  -2 -15   49.40    2.70
  -2  -6 -15   51.99    2.70
   2   6 -15   49.20    3.20
  -2  -6  15   48.60    3.00
   2   6  15   49.40    3.60
   6  -3 -15   90.09    4.50
   6  -3 -15   85.89    4.10
  -3  -6 -15   86.89    4.20
   3   6 -15   81.19    4.90
  -3  -6  15   71.69    4.70
   6  -4 -15  123.39    6.00
   4   6 -15  130.09    7.00
  -4  -6  15  119.69    5.50
   5   6 -15    4.50    1.20
   6  -5 -15    5.90    0.90
   6  -5  15    4.50    0.60
  -5  -6  15    5.40    0.70
   6  -6 -15   -0.60    0.50
   6  -6 -15    0.20    0.70
   6   6 -15    0.00    0.90
   6  -6  15   -0.60    0.60
   6  -6  15    0.40    0.50
   6  -6  15    0.50    0.50
  -6  -6  15    0.30    0.50
   6  -6  15    0.50    0.50
   6   6  15    0.00    0.50
   6  -7 -15   62.79    3.40
   7   6 -15   60.09    3.00
   6  -7 -15   58.99    3.10
  -7  -6  15   63.09    3.00
   6  -7  15   66.99    3.10
   7   6  15   63.99    3.00
   6  -7  15   62.49    3.00
   6  -7  15   65.29    3.00
   5  -7 -15   21.60    1.50
   7   5 -15   20.40    1.40
   7   5 -15   22.30    2.20
   5  -7 -15   19.70    1.60
   5  -7 -15   22.50    1.40
   5  -7  15   24.00    1.40
   7   5  15   23.60    1.40
   5  -7  15   22.50    1.80
   5  -7  15   23.00    1.40
   5  -7  15   23.10    1.40
   5  -7  15   23.30    1.40
  -7  -5  15   22.10    1.30
   4  -7 -15   49.00    2.80
   7   4 -15   50.59    2.50
   7   4 -15   51.39    3.50
   4  -7 -15   49.00    2.40
   4  -7  15   48.30    2.40
  -7  -4  15   50.89    2.40
   4  -7  15   50.29    2.40
   4  -7  15   50.79    3.10
   7   3 -15    7.80    1.40
   3  -7 -15    7.10    1.00
   3  -7  15    8.90    1.10
  -7  -3  15    8.80    0.80
   7   2 -15  180.08    8.40
   2  -7 -15  176.68    8.50
   7   2 -15  181.98    9.80
   2  -7  15  181.78    9.80
   7   1 -15   88.09    4.50
   1  -7 -15   92.09    4.50
   1  -7  15   91.49    5.20
   7   0 -15   72.79    3.60
   0  -7 -15   70.59    3.70
   0  -7  15   67.79    4.10
  -1  -7 -15   94.19    4.60
   7  -1 -15   95.49    4.60
   1   7 -15   85.59    5.30
  -1  -7  15   91.79    5.20
  -2  -7 -15  186.28    8.70
   2   7 -15  168.38    9.80
   7  -2 -15  185.48    8.70
  -2  -7  15  186.78   10.10
  -2  -7  15  188.88    8.00
   3   7 -15   10.30    1.50
  -3  -7 -15   10.40    1.20
   7  -3 -15    9.70    1.10
  -3  -7  15    5.60    1.00
  -3  -7  15    6.20    0.80
   7  -4 -15   47.60    2.80
   7  -4 -15   49.60    2.50
   4   7 -15   53.19    3.50
  -4  -7 -15   49.99    2.90
   7  -4  15   49.90    2.50
   7  -4  15   46.70    2.40
  -4  -7  15   49.70    2.40
  -4  -7  15   49.70    3.20
   5   7 -15   24.60    2.30
   7  -5 -15   23.30    1.70
   7  -5 -15   21.00    1.40
  -5  -7 -15   21.80    1.80
  -5  -7  15   20.20    1.40
   5   7  15   20.70    1.40
   7  -5  15   22.30    1.30
   7  -5  15   22.60    1.30
   7  -5  15   24.30    1.40
   7  -5  15   21.80    1.50
  -5  -7  15   23.00    1.90
   7  -6 -15   67.99    3.20
   7  -6 -15   67.99    3.50
   7  -6  15   64.09    3.20
  -6  -7  15   69.09    4.00
   7  -6  15   62.49    3.00
   7  -6  15   63.09    3.20
  -6  -7  15   61.99    3.00
   7  -6  15   62.69    3.00
   6   7  15   62.09    3.10
   7  -7 -15   -0.10    0.70
   7  -7 -15    0.50    0.60
   7   7 -15    0.20    0.50
   7  -7  15   -0.30    0.40
   7  -7  15    0.00    0.50
   7   7  15    0.60    0.50
  -7  -7  15    0.90    0.50
   7  -7  15   -0.60    0.50
   8   7 -15    7.30    0.90
   7  -8 -15    9.10    1.00
   7  -8 -15   10.20    1.10
   8   7  15   11.30    0.90
   7  -8  15   10.10    0.90
   7  -8  15   11.00    1.00
   7  -8  15    9.40    0.90
   6  -8 -15    2.00    0.60
   6  -8 -15    2.90    0.80
   6  -8 -15    2.50    0.60
   8   6 -15    1.80    0.50
  -8  -6  15    3.20    0.50
   8   6  15    2.80    0.60
   6  -8  15    2.40    0.60
   6  -8  15    2.00    0.50
   6  -8  15    3.40    0.70
   5  -8 -15    3.80    0.70
   5  -8 -15    1.50    0.80
   8   5 -15    2.70    0.60
   5  -8 -15    2.10    0.60
   5  -8  15    2.90    0.80
  -8  -5  15    3.40    0.60
   5  -8  15    3.50    0.60
   5  -8  15    3.60    0.60
   8   5  15    4.50    0.60
   4  -8 -15   15.30    1.40
   8   4 -15   17.30    1.20
   4  -8 -15   13.90    1.20
   4  -8 -15   15.70    1.30
   8   4 -15   19.30    2.10
   4  -8  15   17.90    1.20
   8   4  15   15.80    1.10
   4  -8  15   16.50    1.50
   4  -8  15   16.80    1.20
  -8  -4  15   17.90    1.10
   8   3 -15   76.09    4.90
   8   3 -15   80.99    3.80
   3  -8 -15   76.99    4.10
   3  -8  15   78.39    3.70
  -8  -3  15   82.19    3.70
   8   3  15   80.49    3.70
   2  -8 -15   27.90    1.90
   8   2 -15   30.40    1.70
   8   2 -15   26.10    1.80
   2  -8 -15   29.30    1.60
   2  -8  15   29.00    2.10
  -8  -2  15   28.30    1.60
   8   1 -15   36.00    2.10
   1  -8 -15   36.30    1.90
   8   1 -15   39.40    2.00
   1  -8 -15   36.70    2.30
   1  -8  15   33.00    1.80
   8   1  15   35.20    1.80
   1  -8  15   36.70    2.40
  -8  -1  15   36.50    1.90
   0  -8 -15   33.80    1.80
   8   0 -15   31.00    2.00
   8   0 -15   34.40    1.90
   0  -8 -15   34.60    2.10
   8   0  15   31.50    1.70
   0  -8  15   32.20    2.30
   0  -8  15   32.30    1.70
   8  -1 -15   37.20    1.90
   8  -1 -15   33.30    2.10
  -1  -8 -15   33.50    2.20
  -1  -8 -15   35.30    1.90
  -1  -8  15   38.70    2.50
  -1  -8  15   36.00    1.90
   8  -1  15   35.50    1.80
  -2  -8 -15   28.60    2.00
   8  -2 -15   30.60    1.90
   8  -2 -15   29.60    1.70
  -2  -8 -15   28.10    1.70
   8  -2  15   28.80    1.70
  -2  -8  15   30.70    2.20
  -2  -8  15   31.80    1.60
   8  -2  15   26.80    1.60
  -3  -8 -15   78.19    4.20
   8  -3 -15   81.99    3.90
   8  -3 -15   85.99    4.20
   8  -3 -15   83.39    3.90
   3   8 -15   90.09    5.10
   8  -3  15   81.49    3.90
   8  -3  15   81.69    3.70
   3   8  15   78.19    3.80
  -3  -8  15   82.09    3.80
  -3  -8  15   84.79    4.80
   8  -3  15   76.09    3.80
   8  -3  15   80.39    3.90
   8  -4 -15   15.40    1.20
   4   8 -15   16.80    1.90
  -4  -8 -15   16.90    1.50
   8  -4 -15   18.50    1.50
   4   8  15   16.50    1.20
   8  -4  15   14.80    1.10
   8  -4  15   15.20    1.20
   8  -4  15   15.00    1.20
  -4  -8  15   15.80    1.50
  -4  -8  15   14.10    1.10
   8  -4  15   14.10    1.10
   8  -5 -15    3.80    0.70
   8  -5 -15    5.10    1.00
  -5  -8 -15    2.90    1.00
   8  -5  15    3.20    0.60
  -5  -8  15    3.30    0.60
   8  -5  15    2.70    0.60
   8  -5  15    3.90    0.60
  -5  -8  15    3.90    0.90
   5   8  15    3.30    0.60
   8  -5  15    3.50    0.70
   8  -6 -15    1.40    0.80
   8  -6 -15    2.20    0.60
  -6  -8 -15    0.80    0.80
   8  -6  15    1.60    0.50
   8  -6  15    2.10    0.50
   8  -6  15    1.10    0.50
   6   8  15    2.10    0.50
   8  -6  15    0.60    0.60
  -6  -8  15    0.80    0.50
  -7  -8 -15    7.90    1.20
   8  -7 -15    8.90    1.00
   7   8 -15    9.10    1.00
   8  -7 -15   10.40    1.20
   8  -7  15   12.00    0.90
   8  -7  15   11.30    1.00
   7   8  15   10.20    0.90
   8  -7  15    9.90    0.90
  -7  -8  15    9.00    0.80
   8  -8 -15    1.10    0.50
   8   8 -15    1.40    0.50
   8   8  15    1.50    0.40
   8  -8  15    1.70    0.50
   8  -8  15    1.00    0.40
   8  -8  15    1.60    0.50
   9   8 -15    3.90    0.50
   8  -9 -15    4.50    0.60
   9   8  15    4.20    0.50
   8  -9  15    3.60    0.50
   7  -9 -15    4.40    0.60
   9   7 -15    4.70    0.60
   9   7  15    3.30    0.50
   7  -9  15    5.80    0.80
   9   6 -15    5.80    0.70
   6  -9 -15    7.00    0.80
   6  -9 -15    7.20    1.00
   6  -9 -15    5.70    0.70
   6  -9  15    6.10    0.80
   6  -9  15    6.10    0.70
   9   6  15    5.30    0.60
   5  -9 -15   15.20    1.40
   5  -9 -15   18.00    1.20
   5  -9 -15   17.30    1.20
   5  -9  15   14.70    1.10
   9   5  15   13.40    1.10
   5  -9  15   15.80    1.20
   4  -9 -15   14.60    1.20
   4  -9 -15   16.60    1.20
   9   4 -15   15.50    1.20
   4  -9 -15   14.70    1.40
   4  -9  15   12.90    1.50
   9   4  15   15.70    1.10
   3  -9 -15    2.30    0.60
   9   3 -15    3.80    0.60
   3  -9 -15    3.70    0.80
   3  -9  15    2.60    0.80
   3  -9  15    3.30    0.60
   9   3  15    2.60    0.50
   2  -9 -15   25.20    1.80
   9   2 -15   24.20    1.50
   2  -9 -15   25.70    1.50
   9   2 -15   22.40    1.80
   2  -9  15   22.70    1.40
   2  -9  15   26.70    2.00
   9   2  15   26.00    1.40
   9   2  15   26.90    1.40
   9   1 -15   74.59    3.60
   1  -9 -15   72.99    3.50
   1  -9 -15   71.39    3.90
   9   1 -15   64.59    3.80
   9   1  15   72.99    3.40
   9   1  15   77.69    3.40
   1  -9  15   72.59    3.40
   1  -9  15   80.89    4.40
   9   0 -15    4.70    0.70
   0  -9 -15    3.70    0.70
   9   0 -15    2.80    0.80
   0  -9 -15    2.70    0.90
   0  -9  15    3.80    0.60
   9   0  15    2.40    0.50
   9   0  15    3.30    0.50
   9   0  15    2.50    0.50
   0  -9  15    4.20    0.90
  -1  -9 -15   77.39    4.00
   9  -1 -15   82.49    3.90
  -1  -9 -15   73.19    3.50
   9  -1 -15   77.39    3.60
  -1  -9  15   73.79    3.40
   9  -1  15   72.99    3.40
   9  -1  15   70.39    3.40
   9  -1  15   70.89    3.50
  -1  -9  15   78.69    4.50
   9  -1  15   70.19    3.60
  -2  -9 -15   22.90    1.40
   9  -2 -15   25.10    1.50
   9  -2 -15   25.80    1.80
  -2  -9 -15   22.90    1.80
  -2  -9  15   25.20    1.90
   9  -2  15   19.80    1.40
   9  -2  15   21.50    1.30
   9  -2  15   24.20    1.50
  -2  -9  15   25.80    1.40
   9  -2  15   21.80    1.40
   9  -3 -15    3.50    0.60
   9  -3 -15    2.70    0.80
  -3  -9 -15    3.20    0.90
  -3  -9  15    2.30    0.80
   9  -3  15    4.00    0.70
  -3  -9  15    2.40    0.60
   3   9  15    2.00    0.60
   9  -3  15    3.80    0.60
   9  -3  15    5.40    0.60
   9  -3  15    2.60    0.50
   9  -4 -15   14.20    1.40
   9  -4 -15   12.80    1.10
   9  -4 -15   14.80    1.20
  -4  -9 -15   13.40    1.50
   9  -4  15   12.50    1.10
   9  -4  15   13.80    1.00
   9  -4  15   14.40    1.20
  -4  -9  15   15.10    1.50
  -4  -9  15   15.30    1.10
   9  -4  15   13.20    1.00
   4   9  15   16.10    1.10
   9  -5 -15   14.80    1.20
   9  -5 -15   13.10    1.40
  -5  -9 -15   14.90    1.50
   9  -5  15   16.70    1.10
   9  -5  15   16.60    1.10
   9  -5  15   16.70    1.10
   9  -5  15   17.50    1.30
   5   9  15   14.70    1.10
  -5  -9  15   13.30    1.10
   9  -6 -15    7.00    0.90
  -6  -9 -15    5.90    1.00
   9  -6 -15    6.10    0.90
   9  -6  15    7.20    0.80
   9  -6  15    5.40    0.60
   9  -6  15    6.60    0.80
  -6  -9  15    6.20    0.70
   6   9  15    5.30    0.60
   9  -6  15    5.70    0.80
   7   9 -15    4.50    0.60
   9  -7 -15    4.10    0.60
   9  -7  15    4.90    0.50
  -7  -9  15    4.40    0.50
   9  -7  15    4.70    0.60
   7   9  15    3.80    0.50
   9  -7  15    4.60    0.60
   9  -8 -15    4.20    0.60
   8   9 -15    4.70    0.60
   9  -8  15    4.50    0.50
   8   9  15    5.90    0.60
   9  -8  15    4.60    0.60
   9  -9 -15    0.50    0.40
   9   9  15    1.10    0.30
   8 -10 -15    0.30    0.30
  10   8  15    0.90    0.30
   7 -10 -15    1.70    0.40
   7 -10 -15    1.20    0.40
  10   7  15    2.20    0.40
   6 -10 -15    2.70    0.50
   6 -10 -15    2.40    0.50
  10   6  15    1.70    0.40
   5 -10 -15    3.10    0.60
   5 -10 -15    2.90    0.50
  10   5  15    2.70    0.50
   4 -10 -15   15.50    1.30
   4 -10 -15   18.00    1.20
  10   4 -15   17.00    1.10
  10   4  15   16.30    1.10
   3 -10 -15    3.40    0.60
   3 -10 -15    2.70    0.80
  10   3 -15    3.20    0.60
  10   3  15    4.30    0.50
  10   3  15    2.80    0.50
   2 -10 -15    3.10    0.80
   2 -10 -15    1.50    0.60
  10   2 -15    3.60    0.60
  10   2  15    2.80    0.50
   2 -10  15    3.20    0.60
  10   2  15    3.40    0.50
  10   1 -15    9.90    1.20
  10   1 -15   11.40    1.00
   1 -10 -15   11.20    1.00
   1 -10 -15   10.60    1.20
  10   1  15   10.40    0.90
  10   1  15   11.00    0.90
   1 -10  15    9.60    0.90
  10   0 -15   17.00    1.50
  10   0 -15   19.70    1.30
   0 -10 -15   17.60    1.20
   0 -10 -15   15.90    1.50
  10   0  15   19.60    1.10
  10   0  15   17.90    1.10
   0 -10  15   18.20    1.20
  -1 -10 -15    9.50    1.00
  10  -1 -15   10.80    1.10
  10  -1 -15   12.20    1.20
  -1 -10 -15   10.70    1.30
  10  -1  15   10.30    1.00
  -1 -10  15   10.50    0.90
  10  -1  15   11.50    0.90
  10  -1  15    9.40    0.90
  10  -1  15   10.40    0.90
  10  -2 -15    3.20    0.60
  10  -2 -15    3.20    0.80
  -2 -10 -15    3.60    0.90
  -2 -10  15    2.50    0.50
  10  -2  15    2.80    0.50
  10  -2  15    2.60    0.50
  10  -2  15    2.50    0.60
  10  -2  15    3.40    0.60
  10  -3 -15    4.00    0.80
  -3 -10 -15    2.50    0.90
  10  -3 -15    2.90    0.60
  10  -3  15    2.80    0.50
  10  -3  15    2.30    0.60
  10  -3  15    2.70    0.50
  -3 -10  15    3.30    0.60
   3  10  15    4.10    0.60
  10  -3  15    2.40    0.50
  -4 -10 -15   15.60    1.40
  10  -4 -15   15.20    1.20
  10  -4 -15   15.90    1.40
  10  -4  15   17.80    1.10
  10  -4  15   17.10    1.20
  10  -4  15   17.40    1.10
  10  -4  15   16.70    1.10
  -4 -10  15   16.30    1.10
   4  10  15   18.80    1.20
  10  -5 -15    2.70    0.50
  10  -5  15    3.10    0.50
  10  -5  15    2.70    0.50
   5  10  15    2.70    0.50
  -5 -10  15    2.70    0.50
  10  -5  15    3.10    0.60
[truncated: 482,392 more chars]
