# Supplementary material for: Schiff Base Ancillary Ligands in Bis(diimine) Copper(I) Dye-Sensitized Solar Cells
Source: Int J Mol Sci. 2020 Mar 3;21(5):1735. doi: 10.3390/ijms21051735 (PMC7084427; doi:10.3390/ijms21051735)
Supplement: Supplementary file 1 [file ijms-21-01735-s001.zip › Supporting information 21Feb 2020.docx]

Supporting information

Schiff Base Ancillary Ligands in Bis(diimine) Copper(I) Dye-Sensitized Solar Cells

Elias Lüthi,1 Paola Andrea Forero Cortés,1 Alessandro Prescimone,1 Edwin C. Constable1 and Catherine E. Housecroft1*

1Department of Chemistry, University of Basel, BPR 1096, Mattenstrasse 24a, CH-4058 Basel, Switzerland


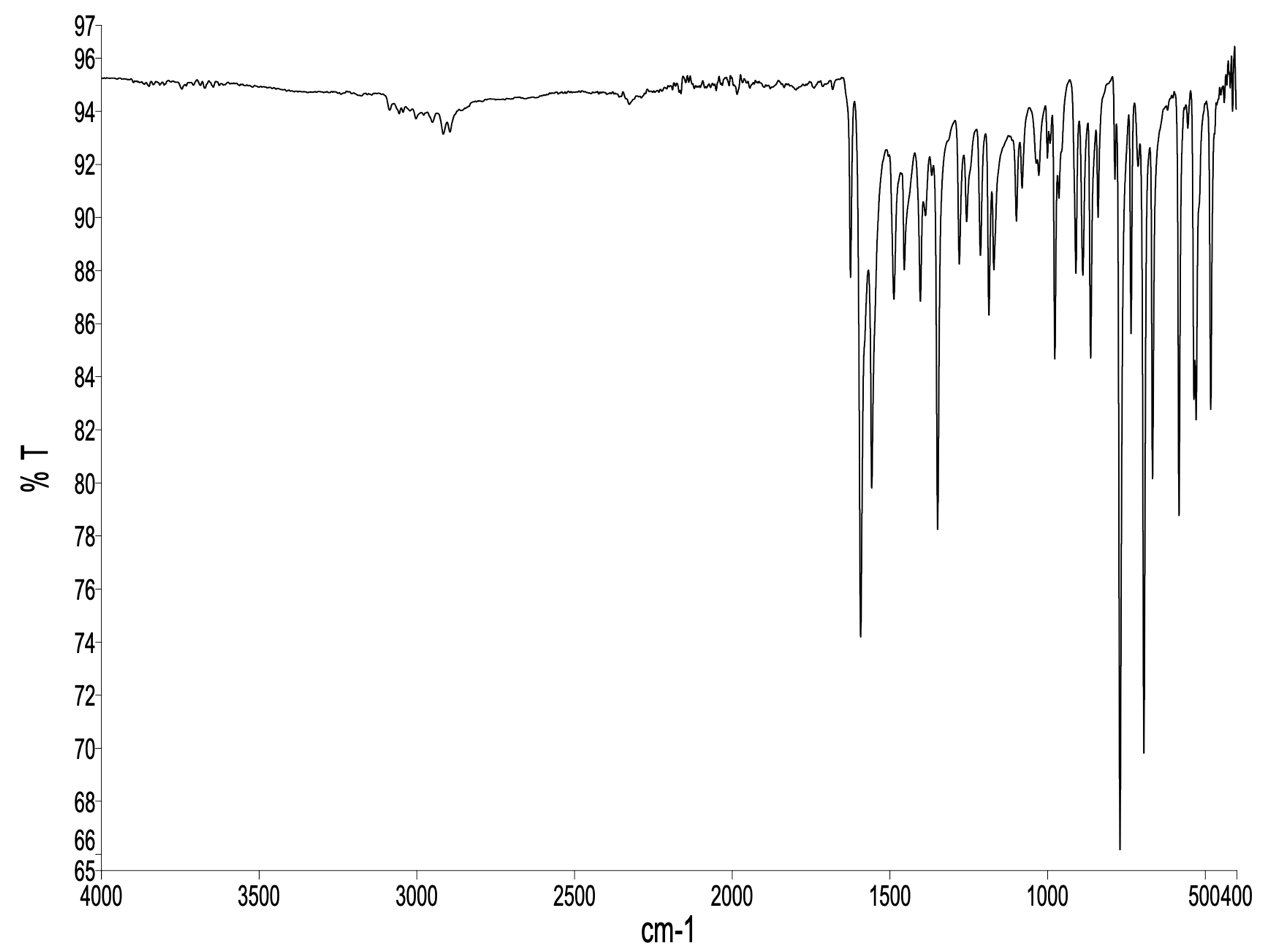


Figure S1. Solid-state FT-IR spectrum of ligand **1**.


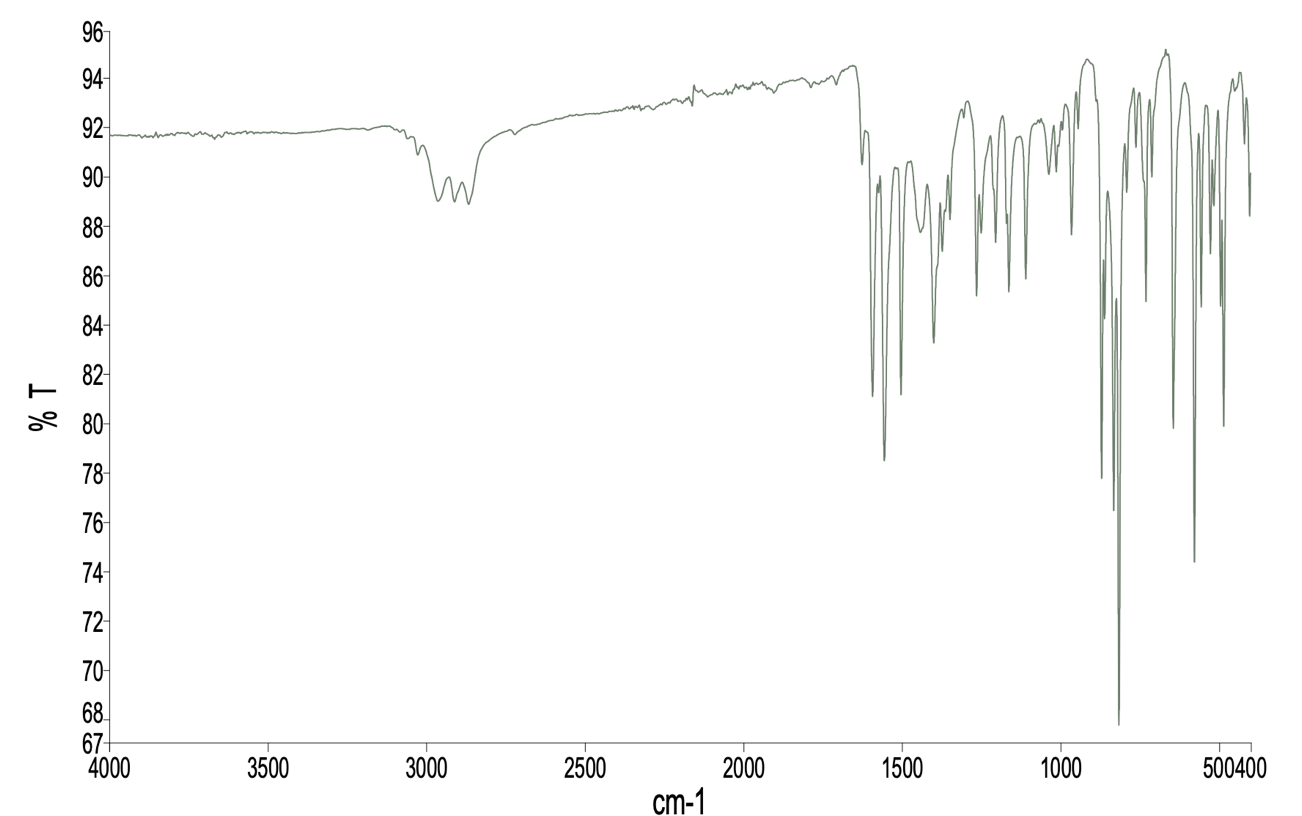


Figure S2. Solid-state FT-IR spectrum of ligand **2**.


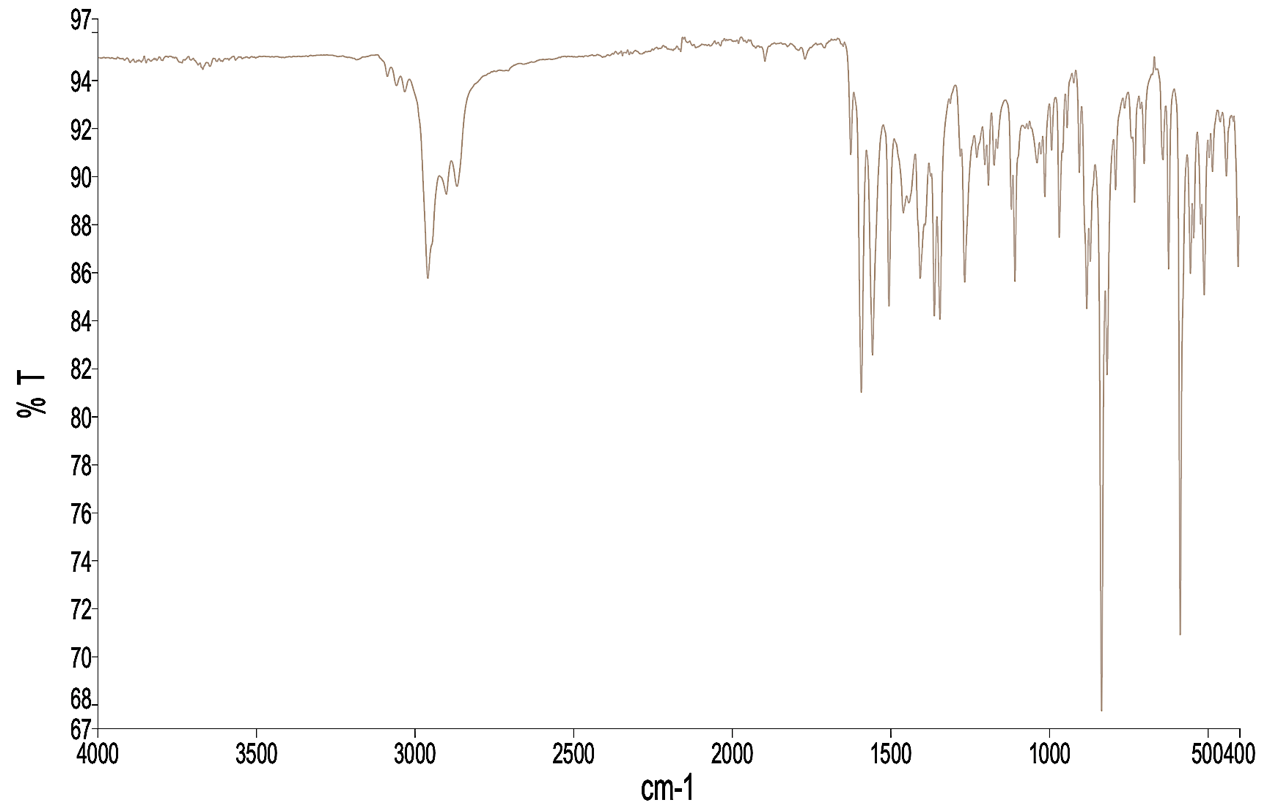


Figure S3. Solid-state FT-IR spectrum of ligand **3**.


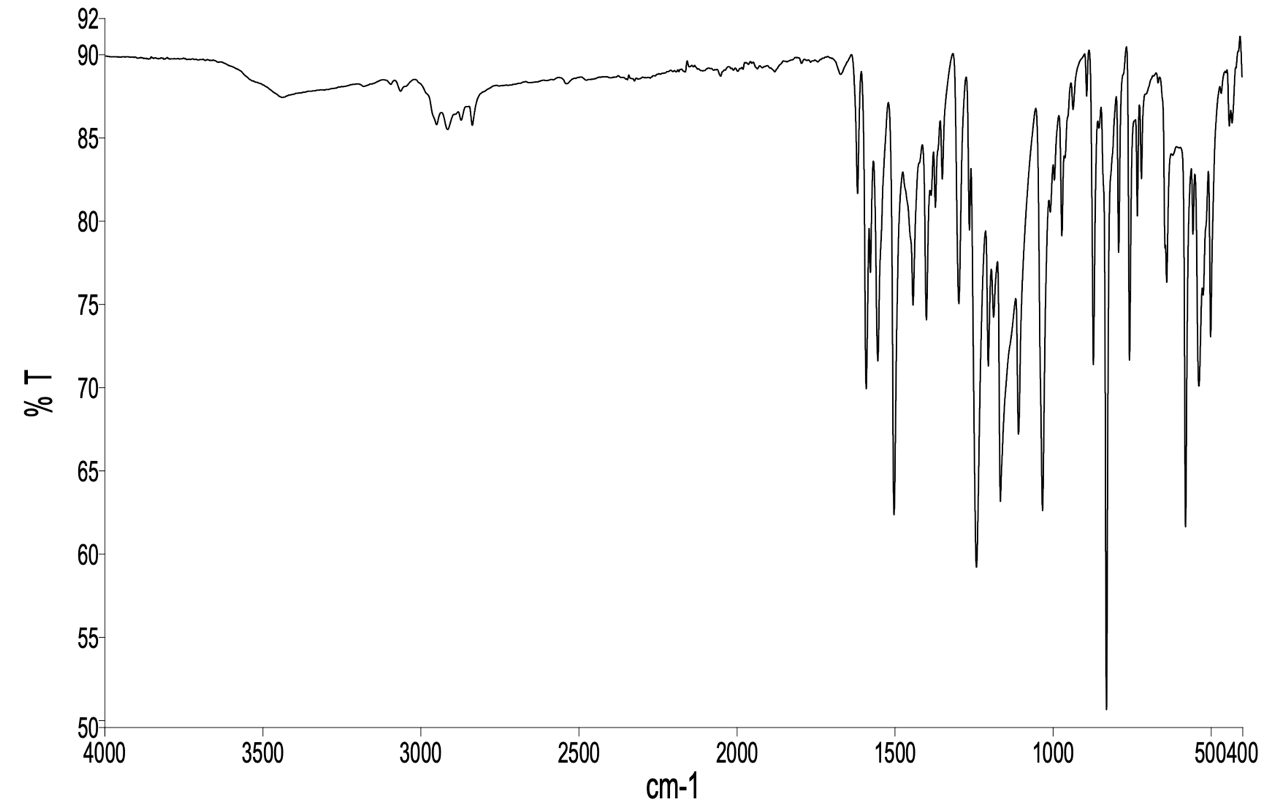


Figure S4. Solid-state FT-IR spectrum of ligand **4**.


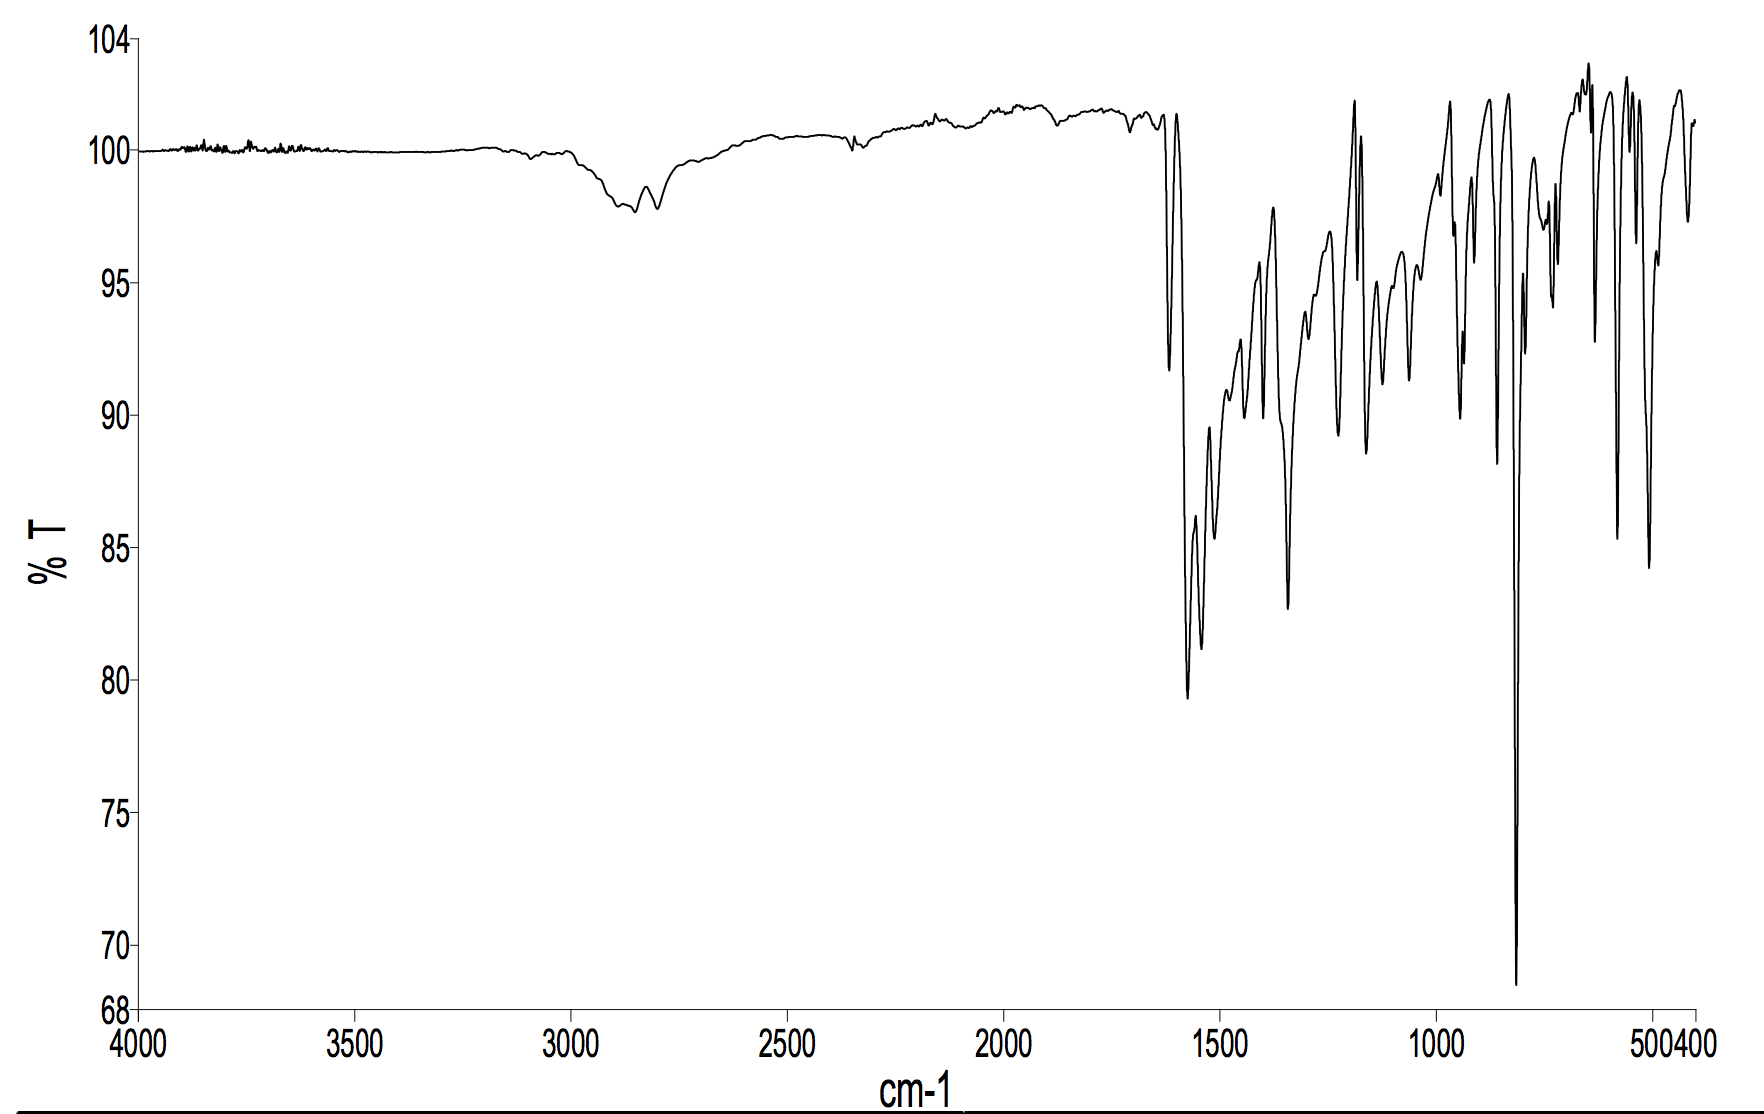


Figure S5. Solid-state FT-IR spectrum of ligand **5**.


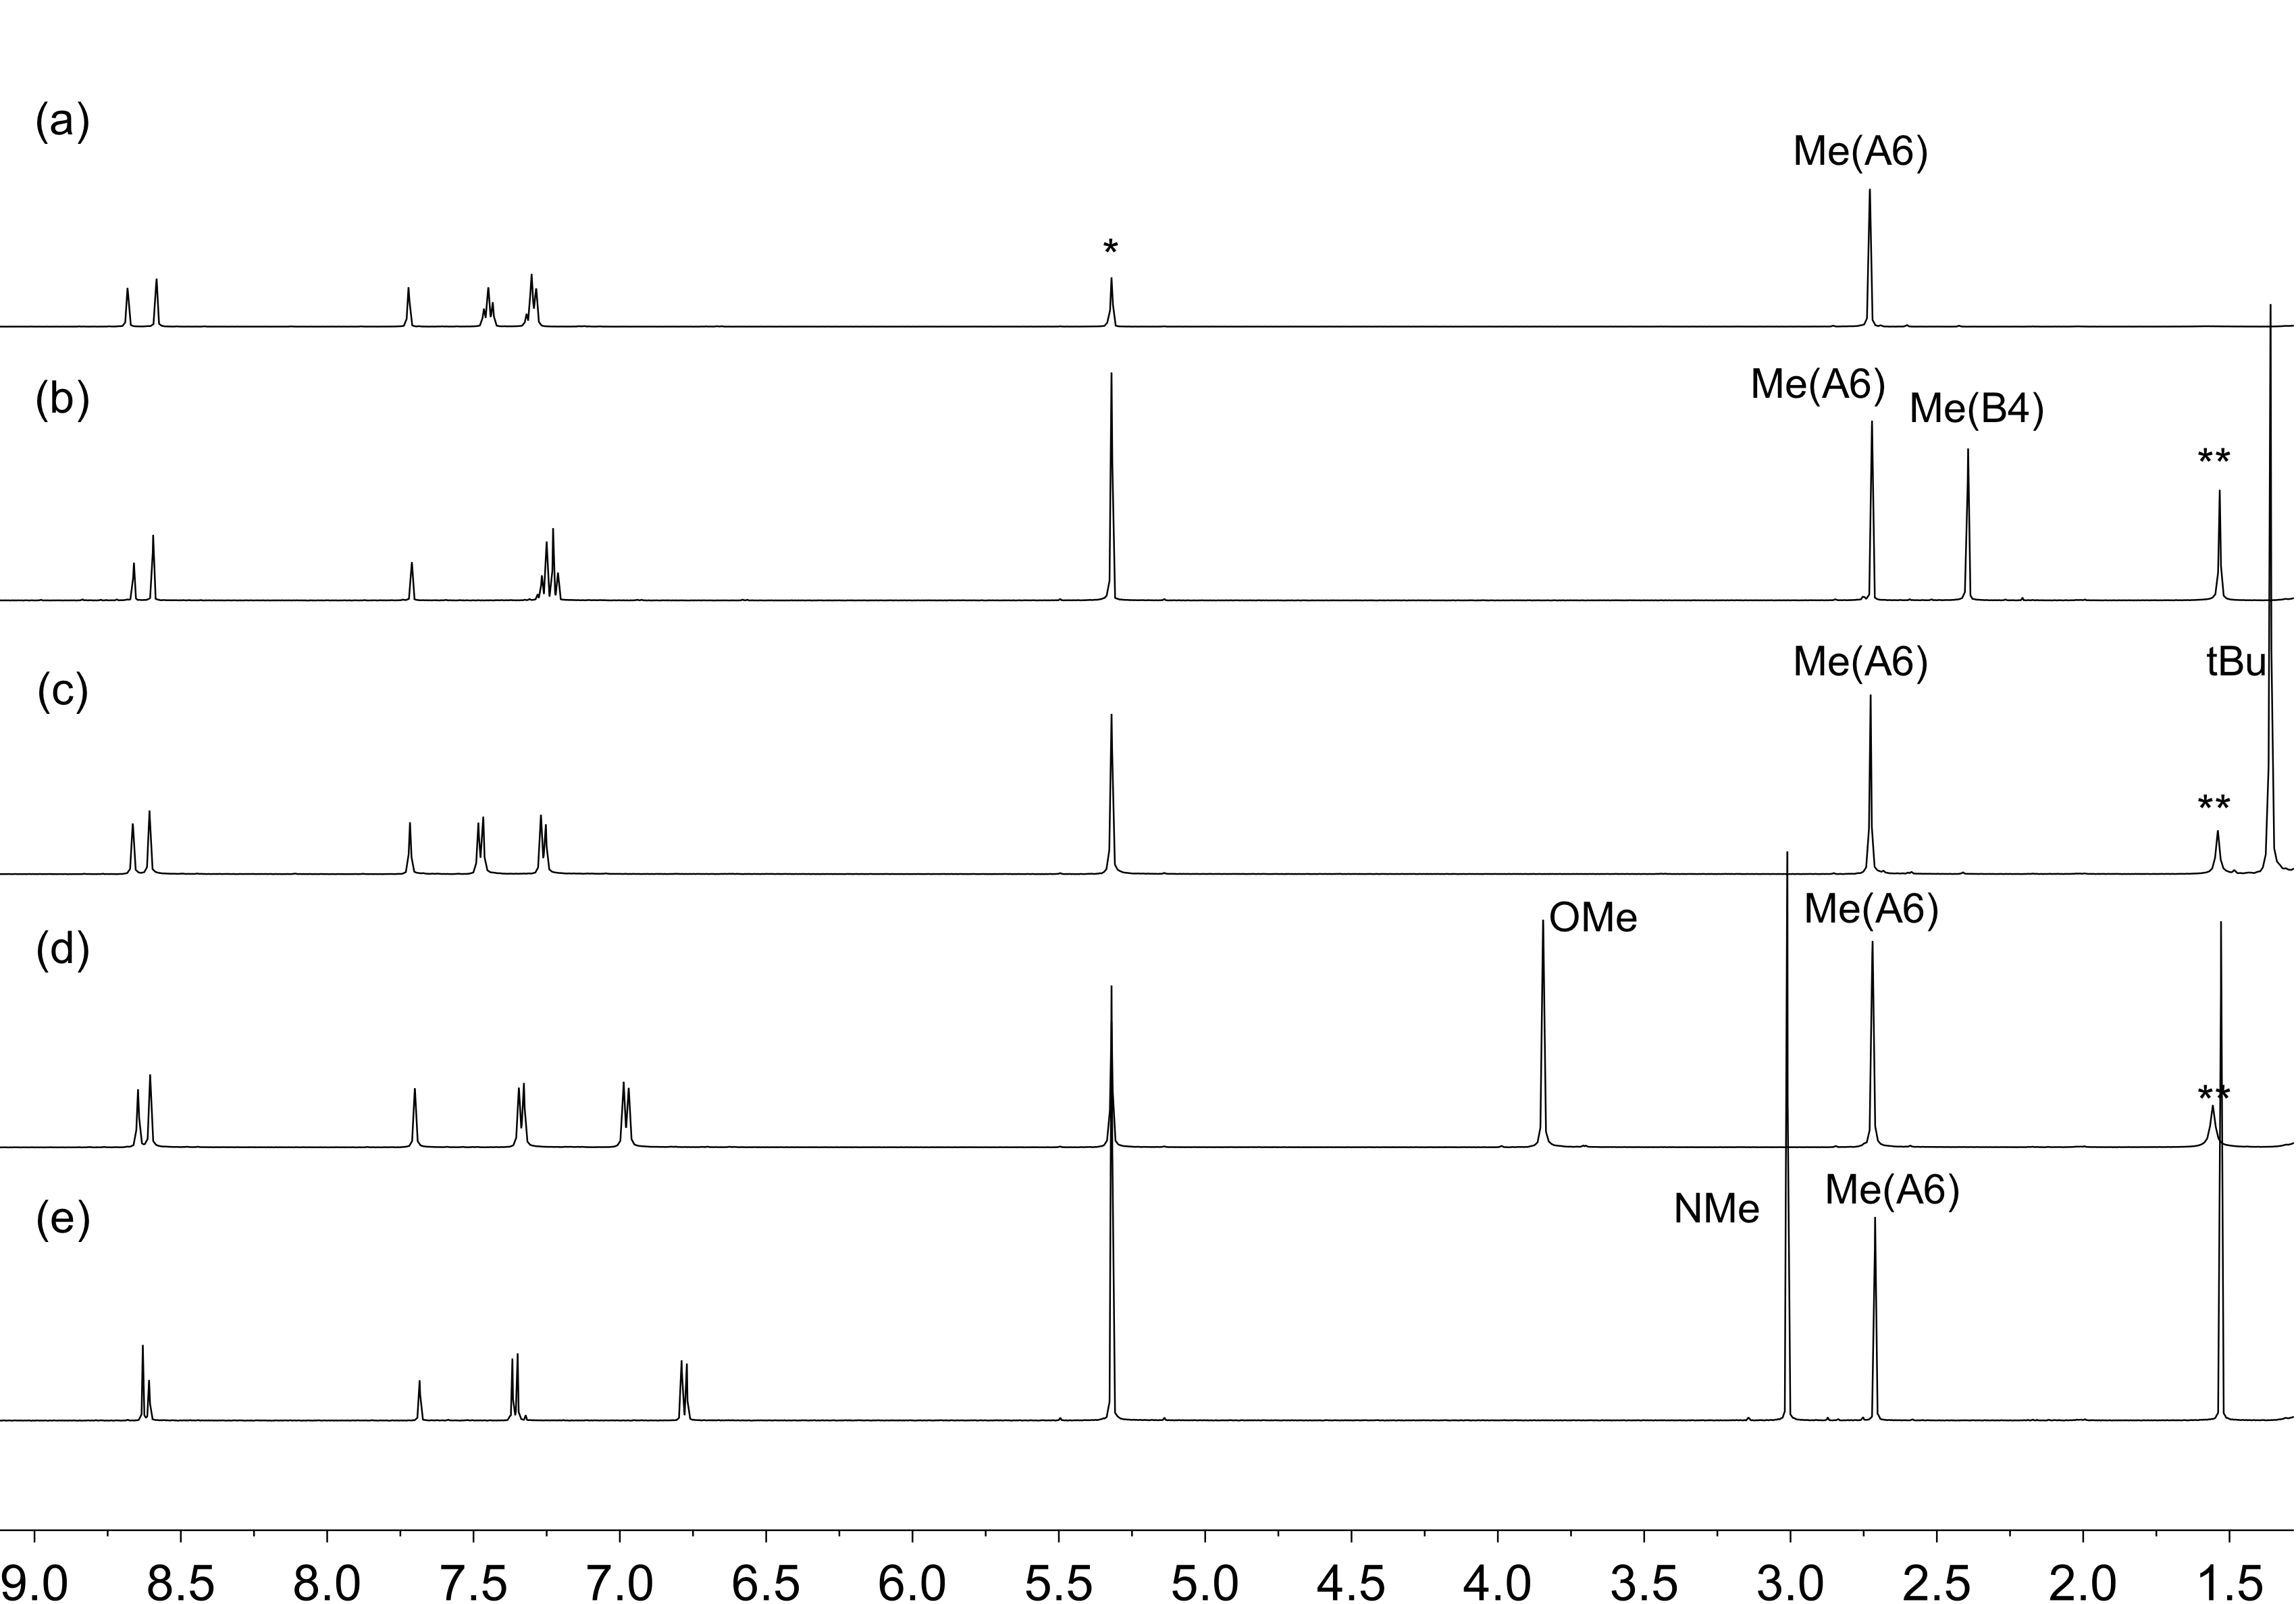


Figure S6. 1H NMR (500 MHz, CD2Cl2, 298 K) spectra of ligands (a) **1**, (b) **2**, (c) **3**, (d) **4**, and (e) **5**. See Scheme 1 for atom labels. * = residual CHDCl2; ** = H2O.


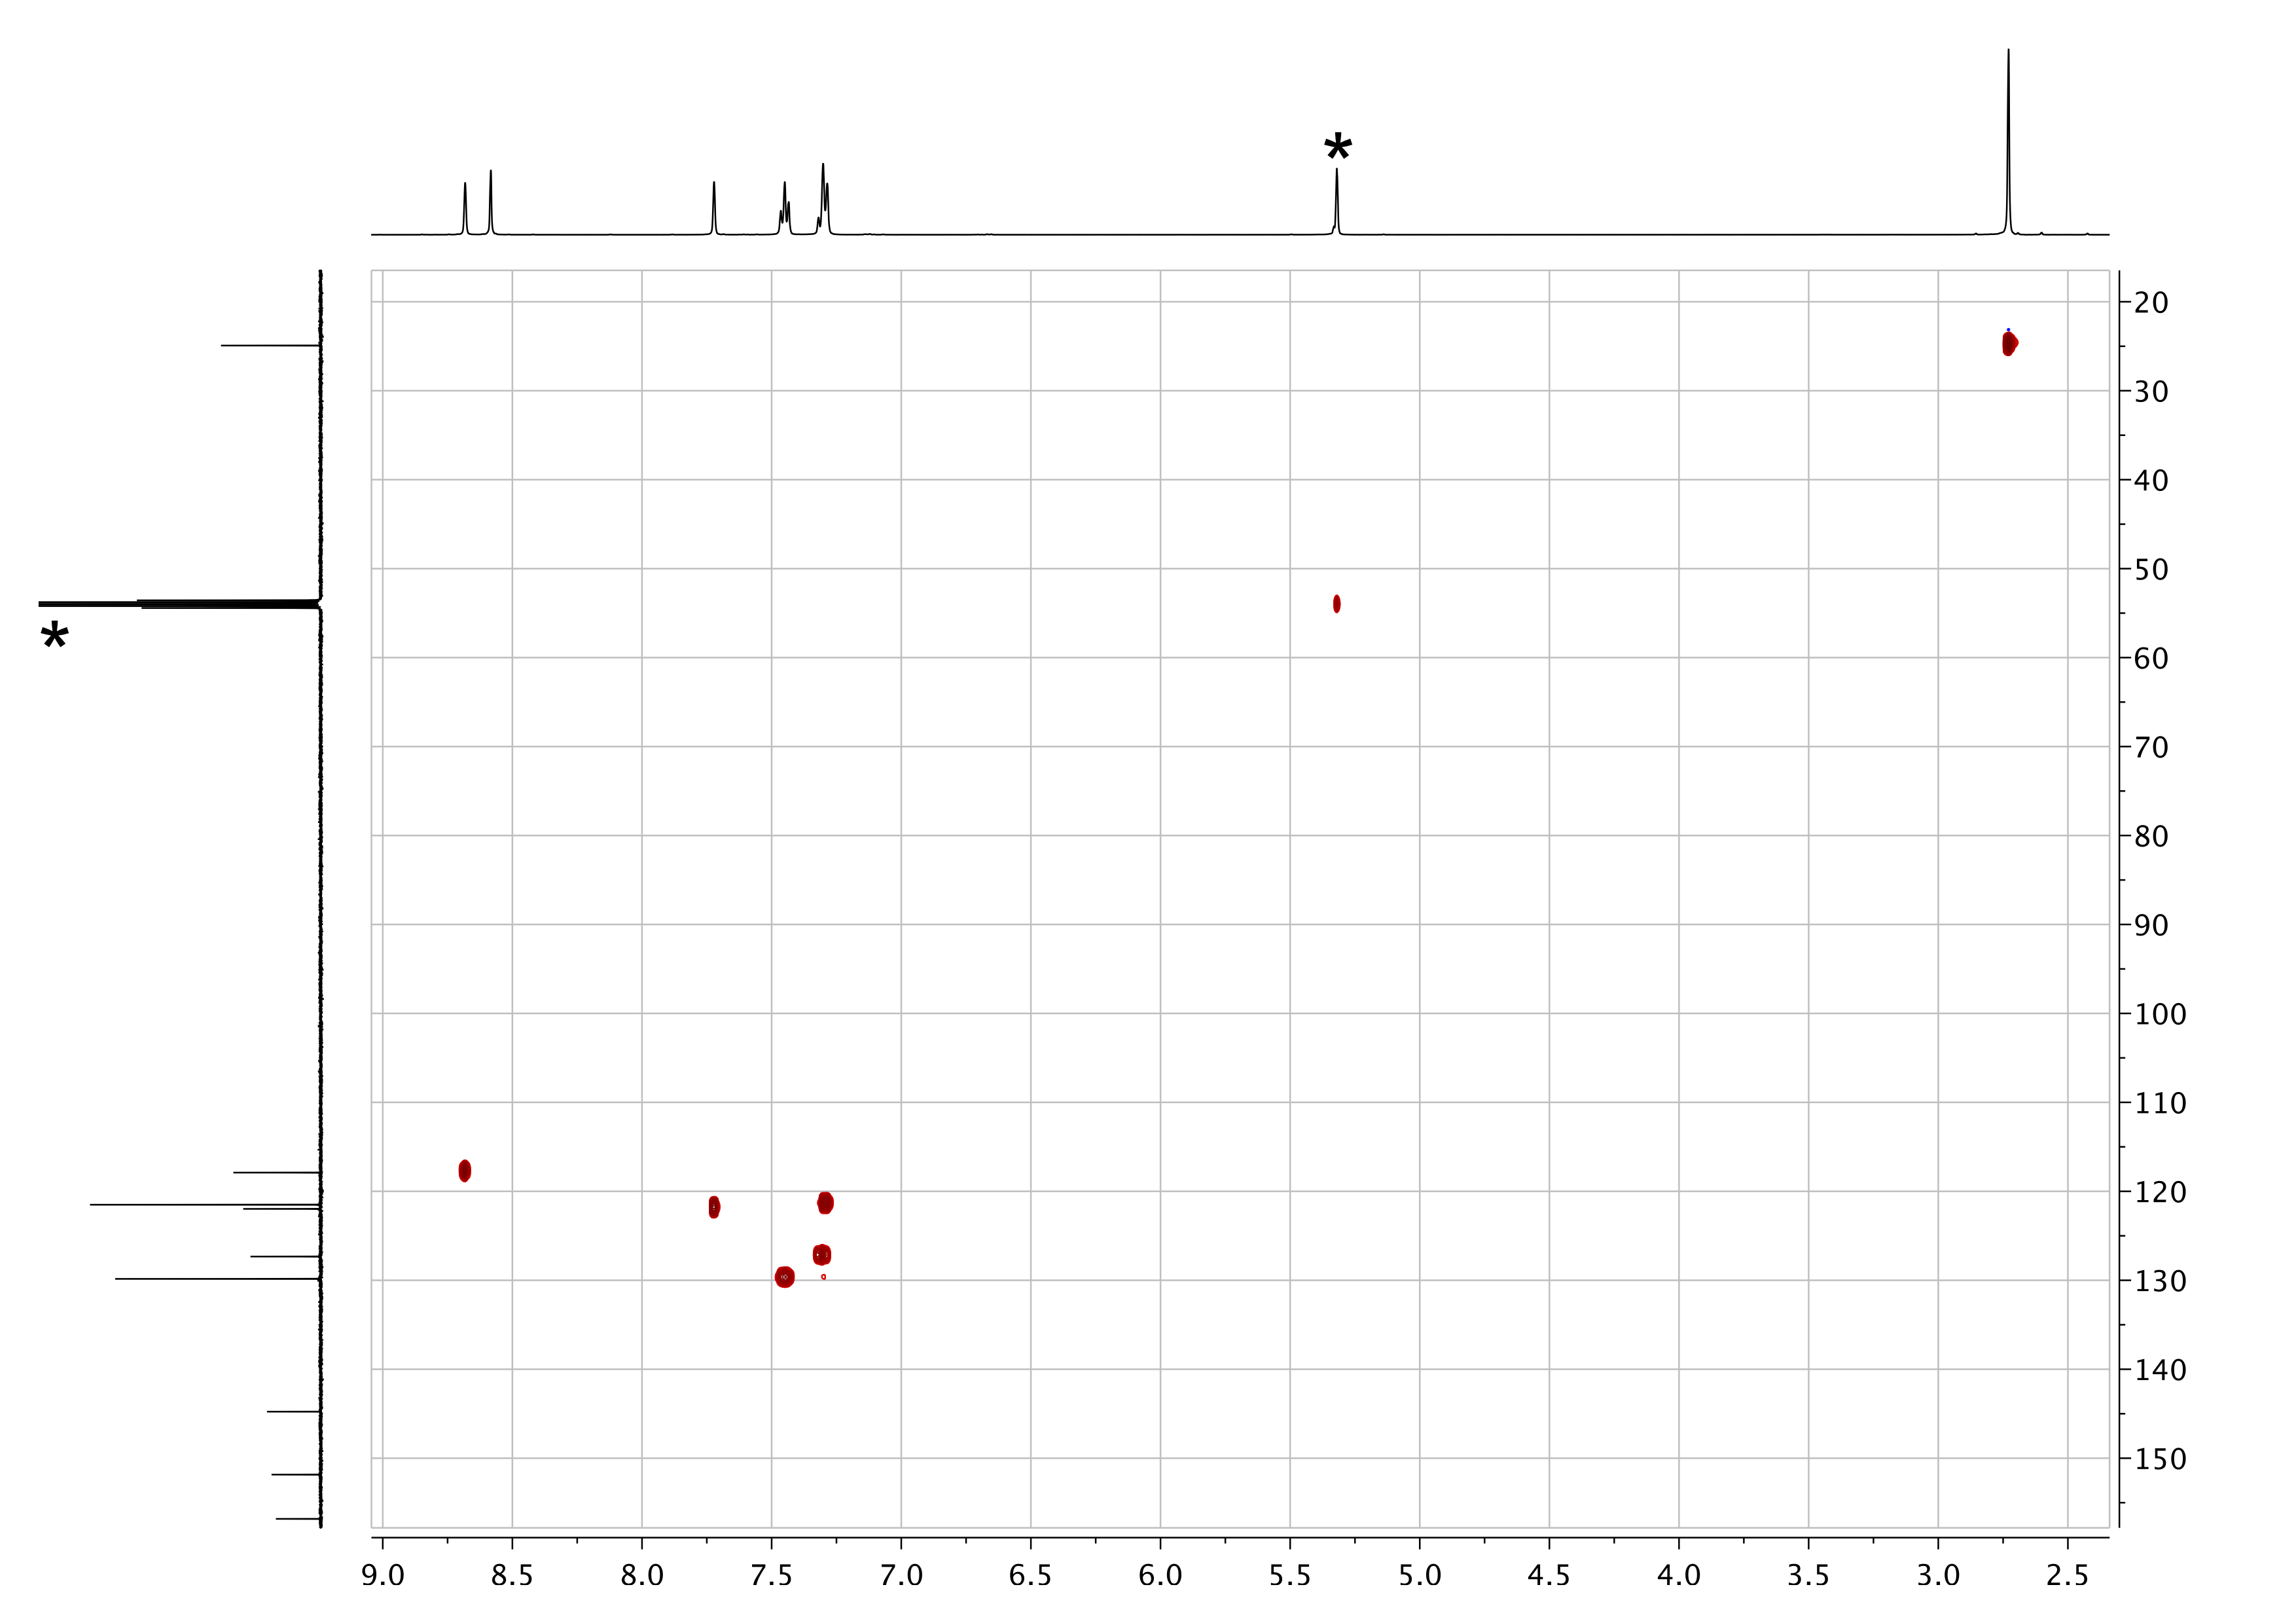


Figure S7. HMQC of ligand **1** (500 MHz 1H, 126 MHz 13C, CD2Cl2, 298 K). * = residual CHDCl2.


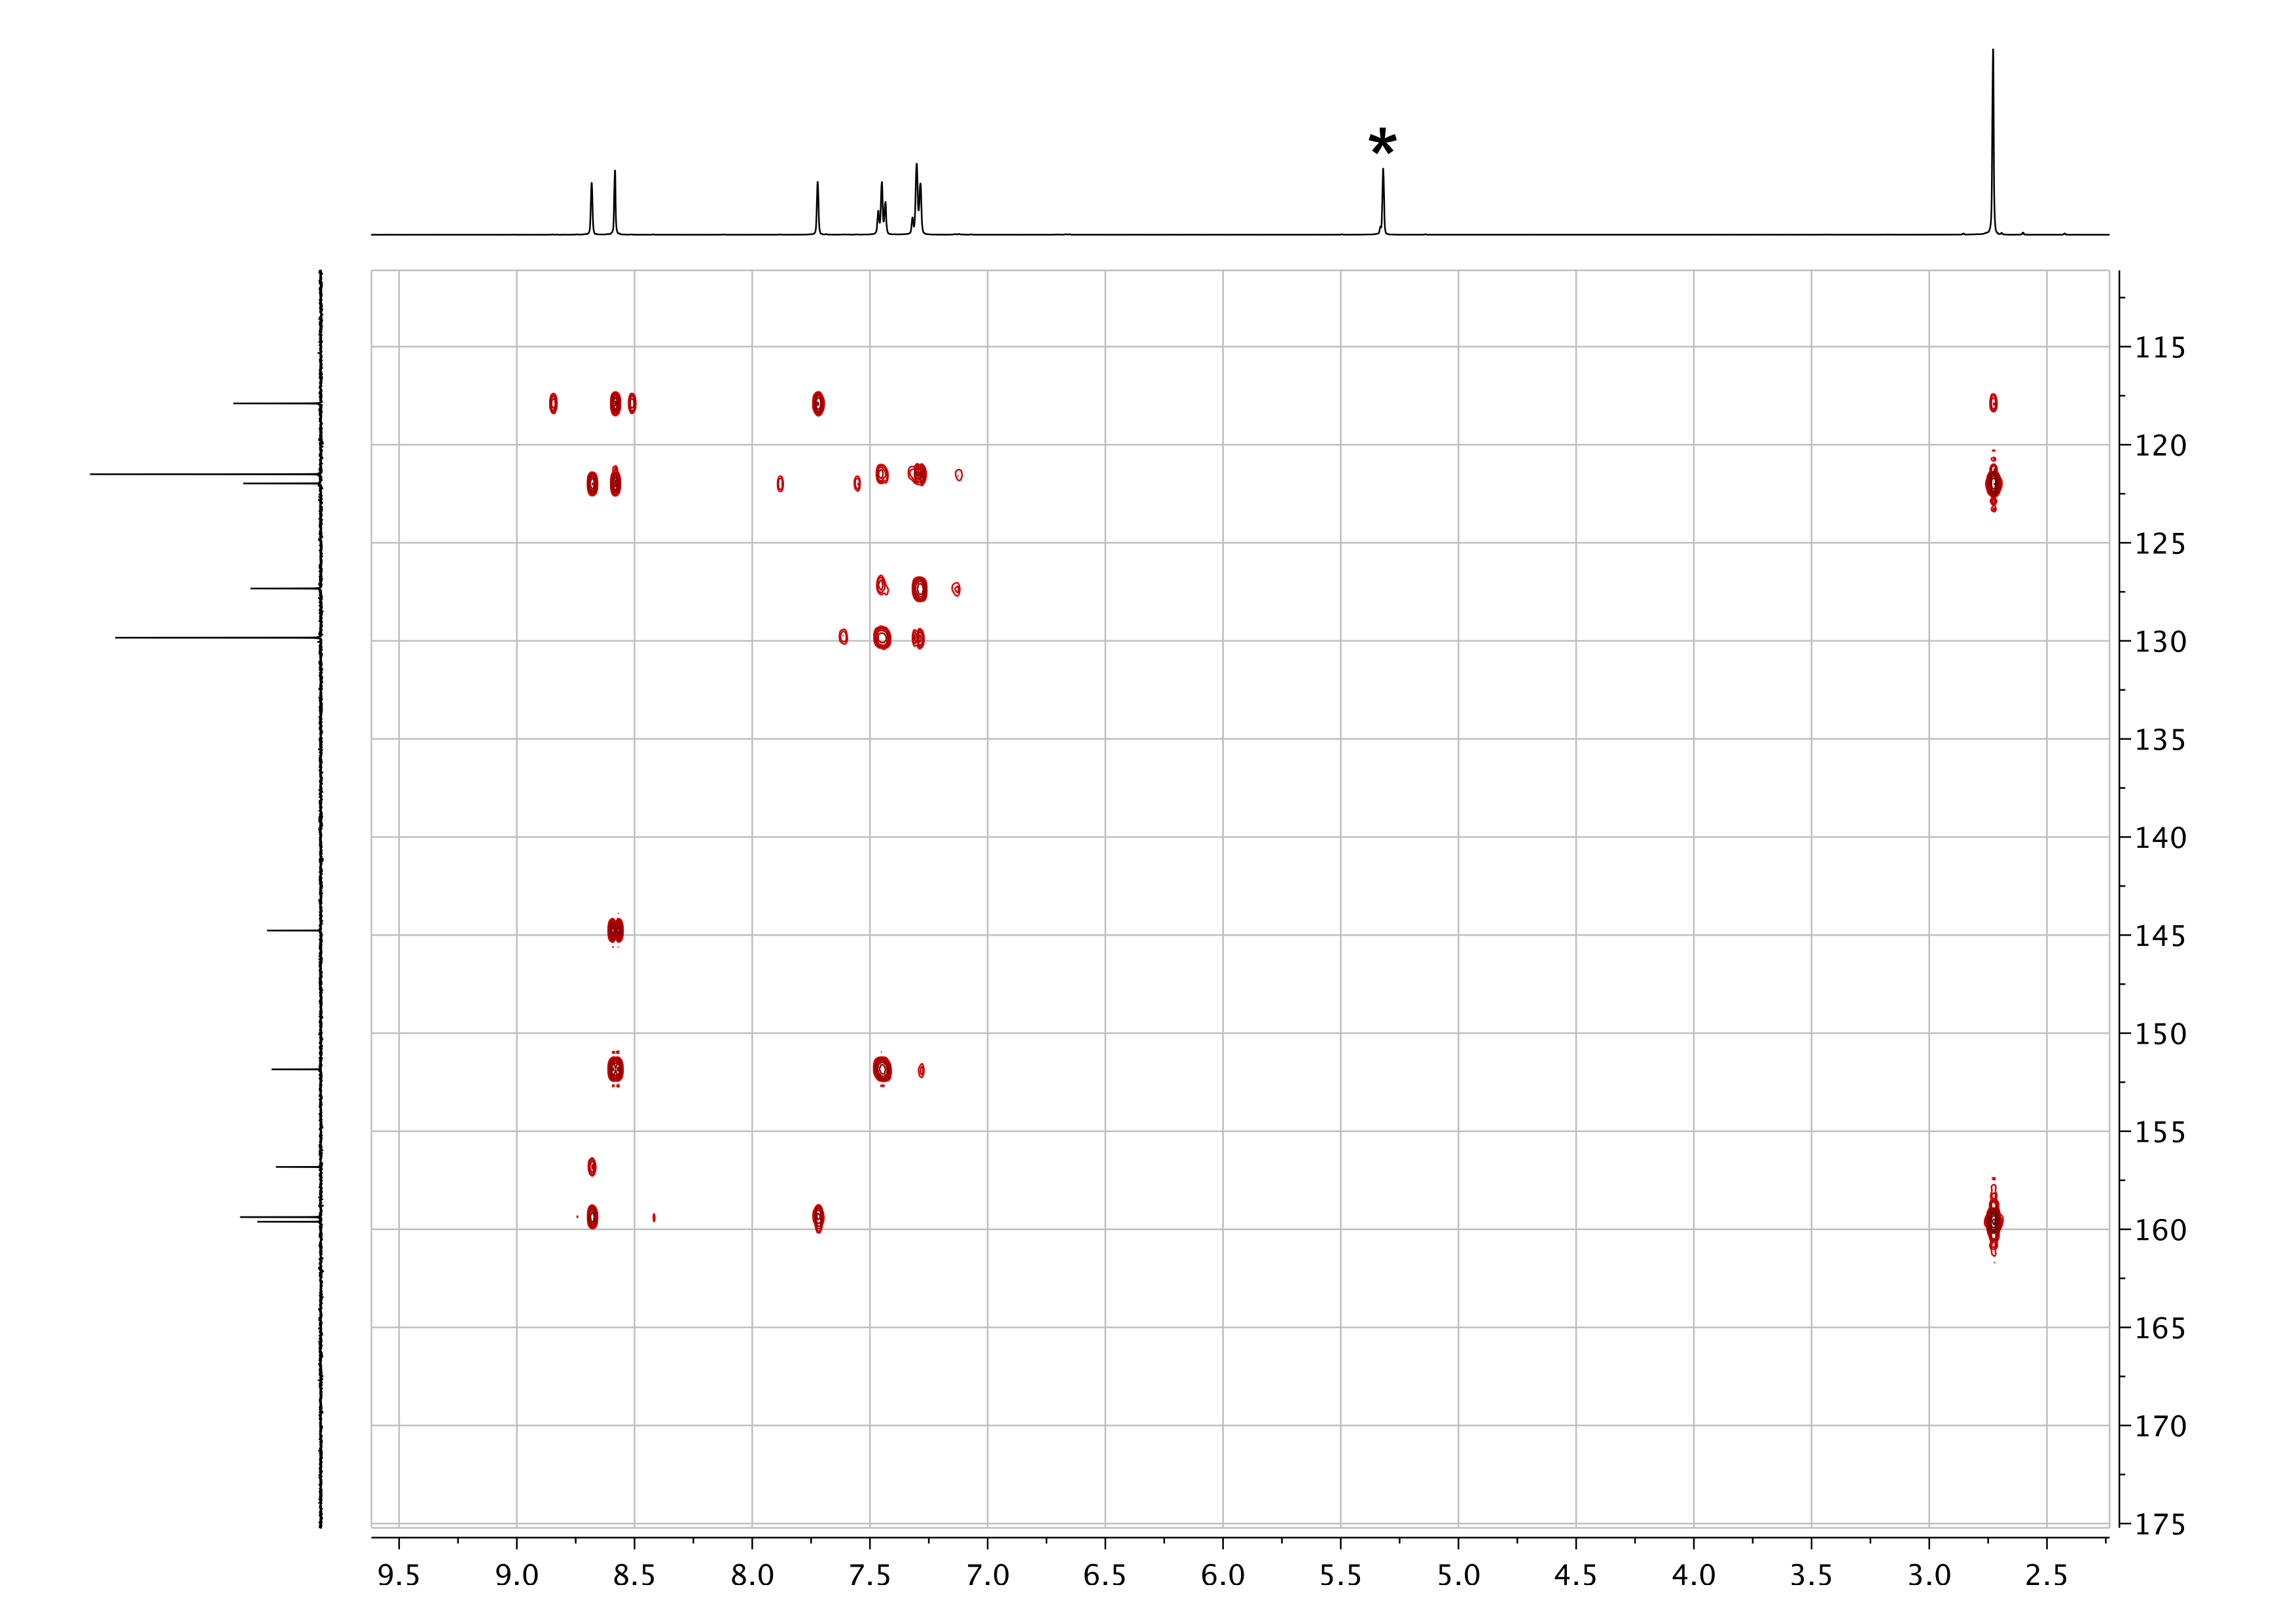


Figure S8. HMBC of of ligand **1** (500 MHz 1H, 126 MHz 13C, CD2Cl2, 298 K). * = residual CHDCl2.

**
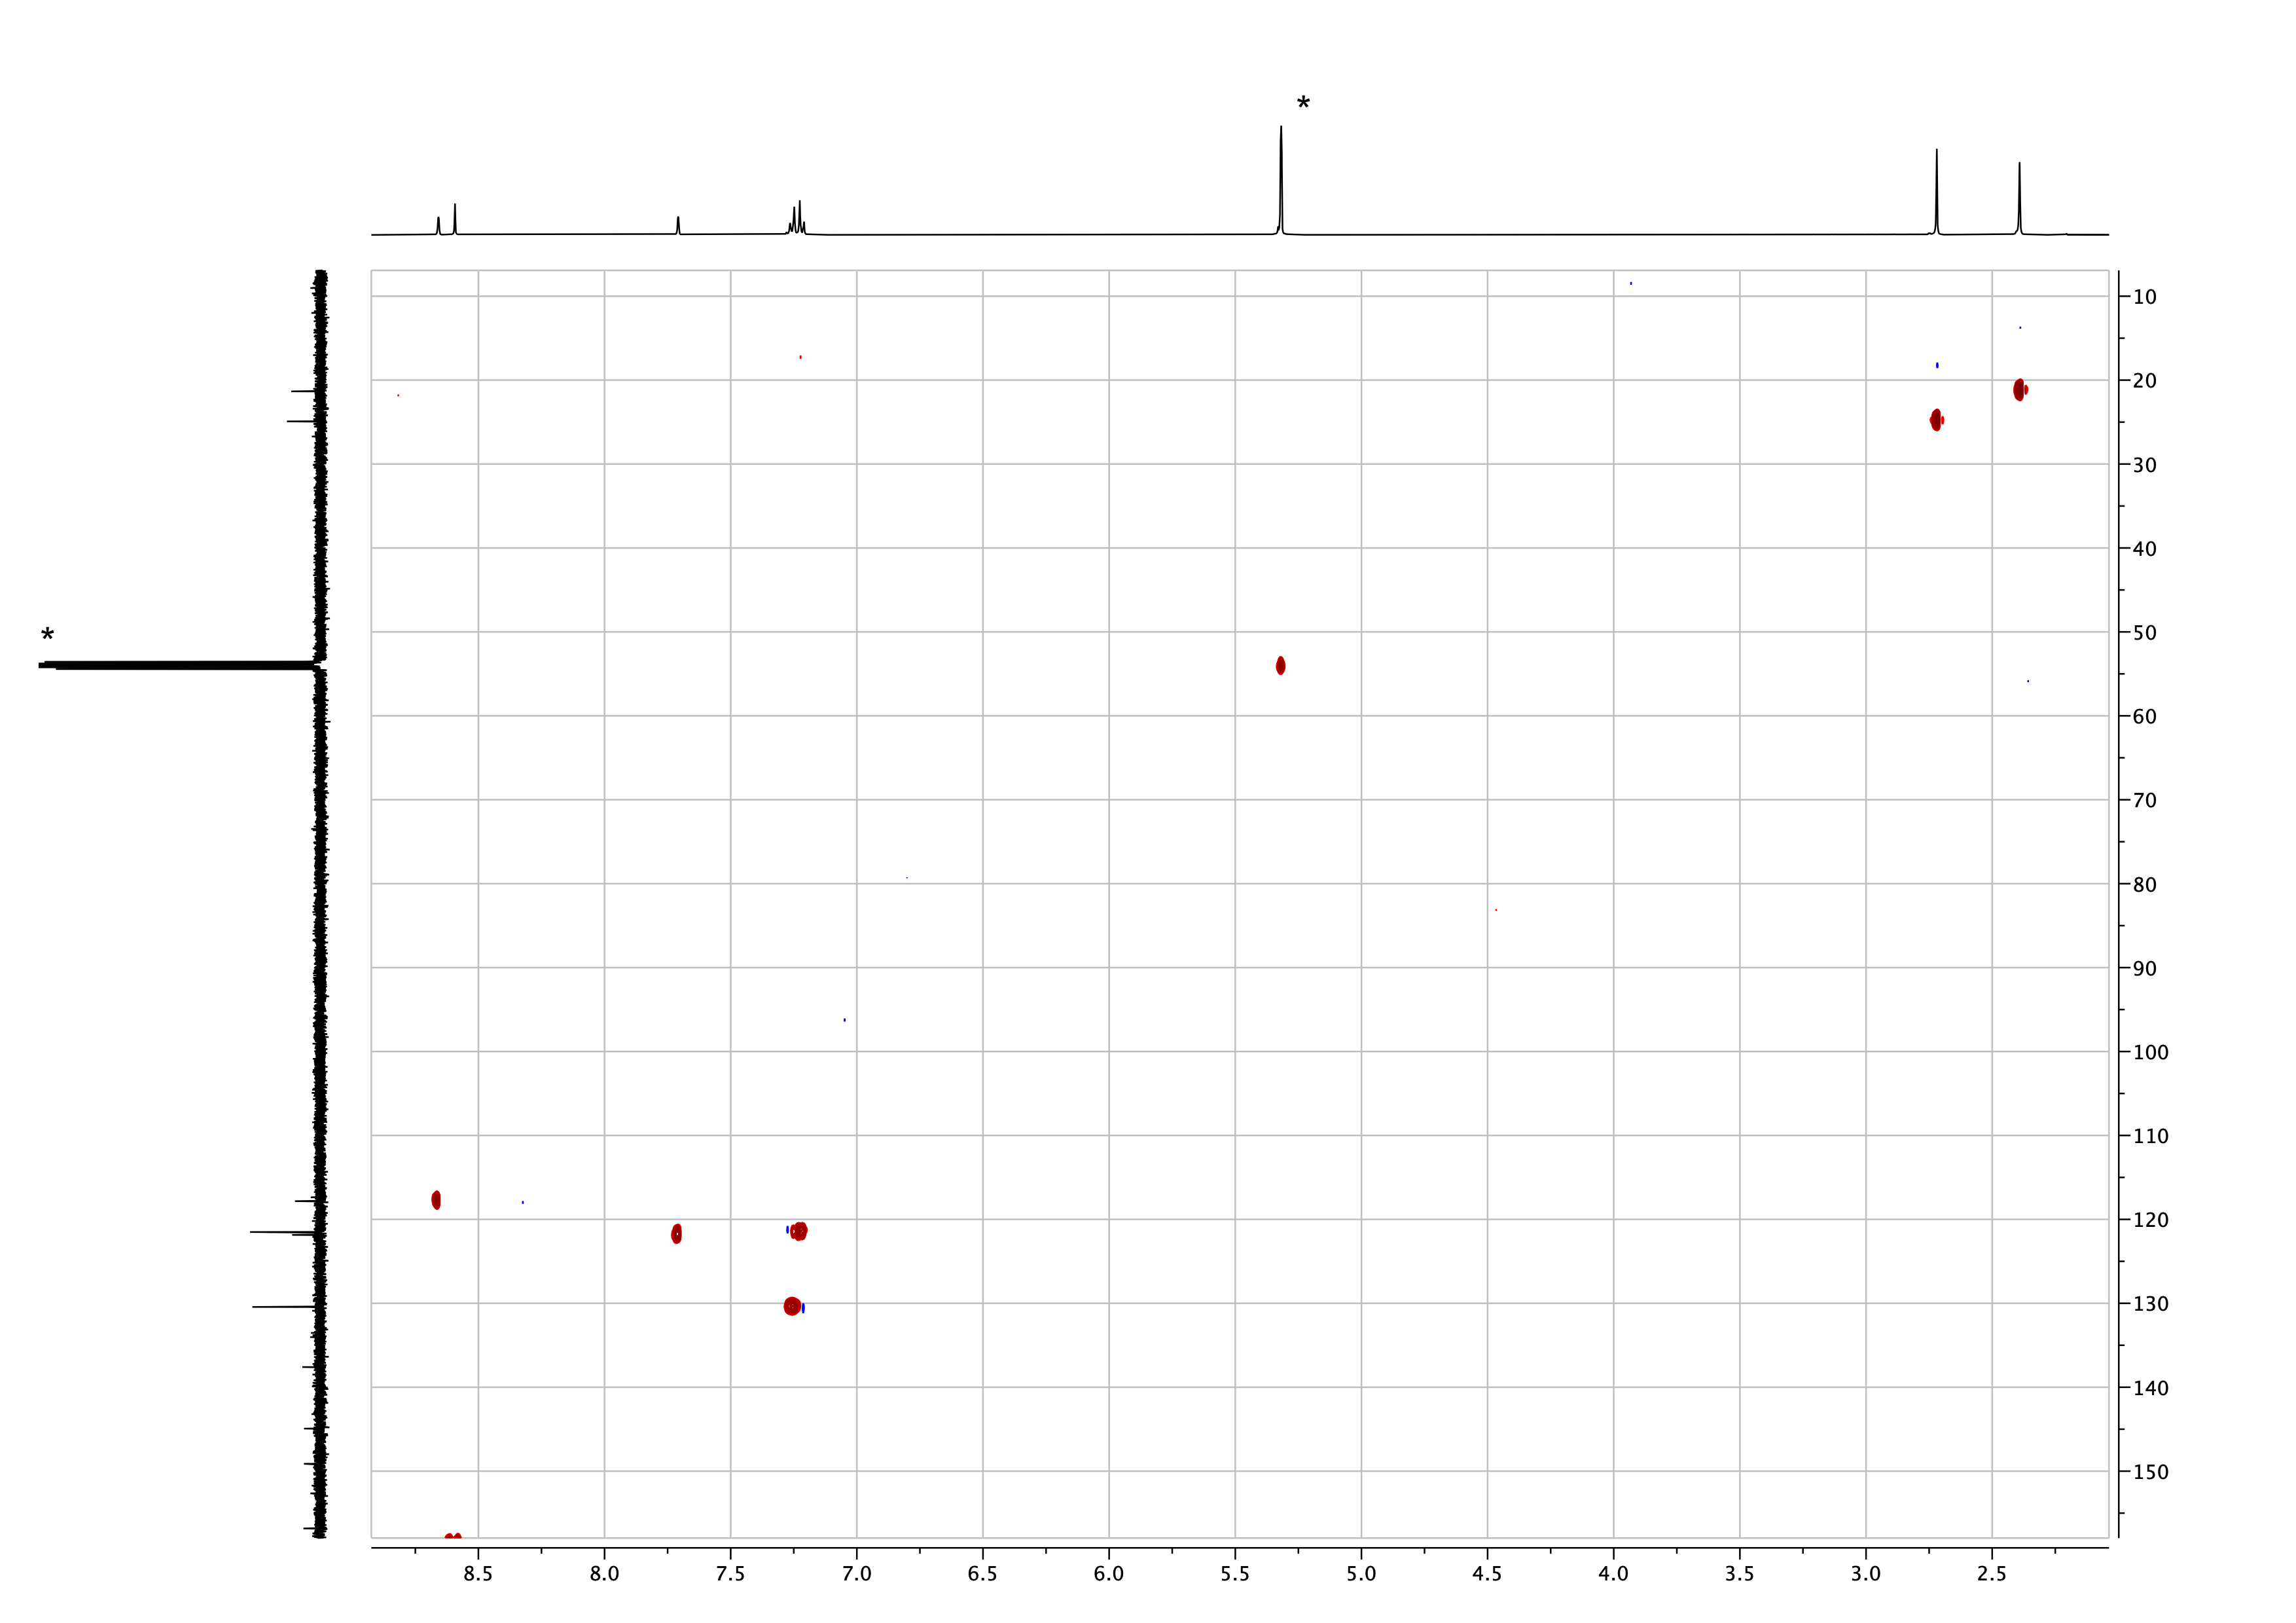
**

Figure S9. HMQC of ligand **2** (500 MHz 1H, 126 MHz 13C, CD2Cl2, 298 K). * = residual CHDCl2 or CD2Cl2.


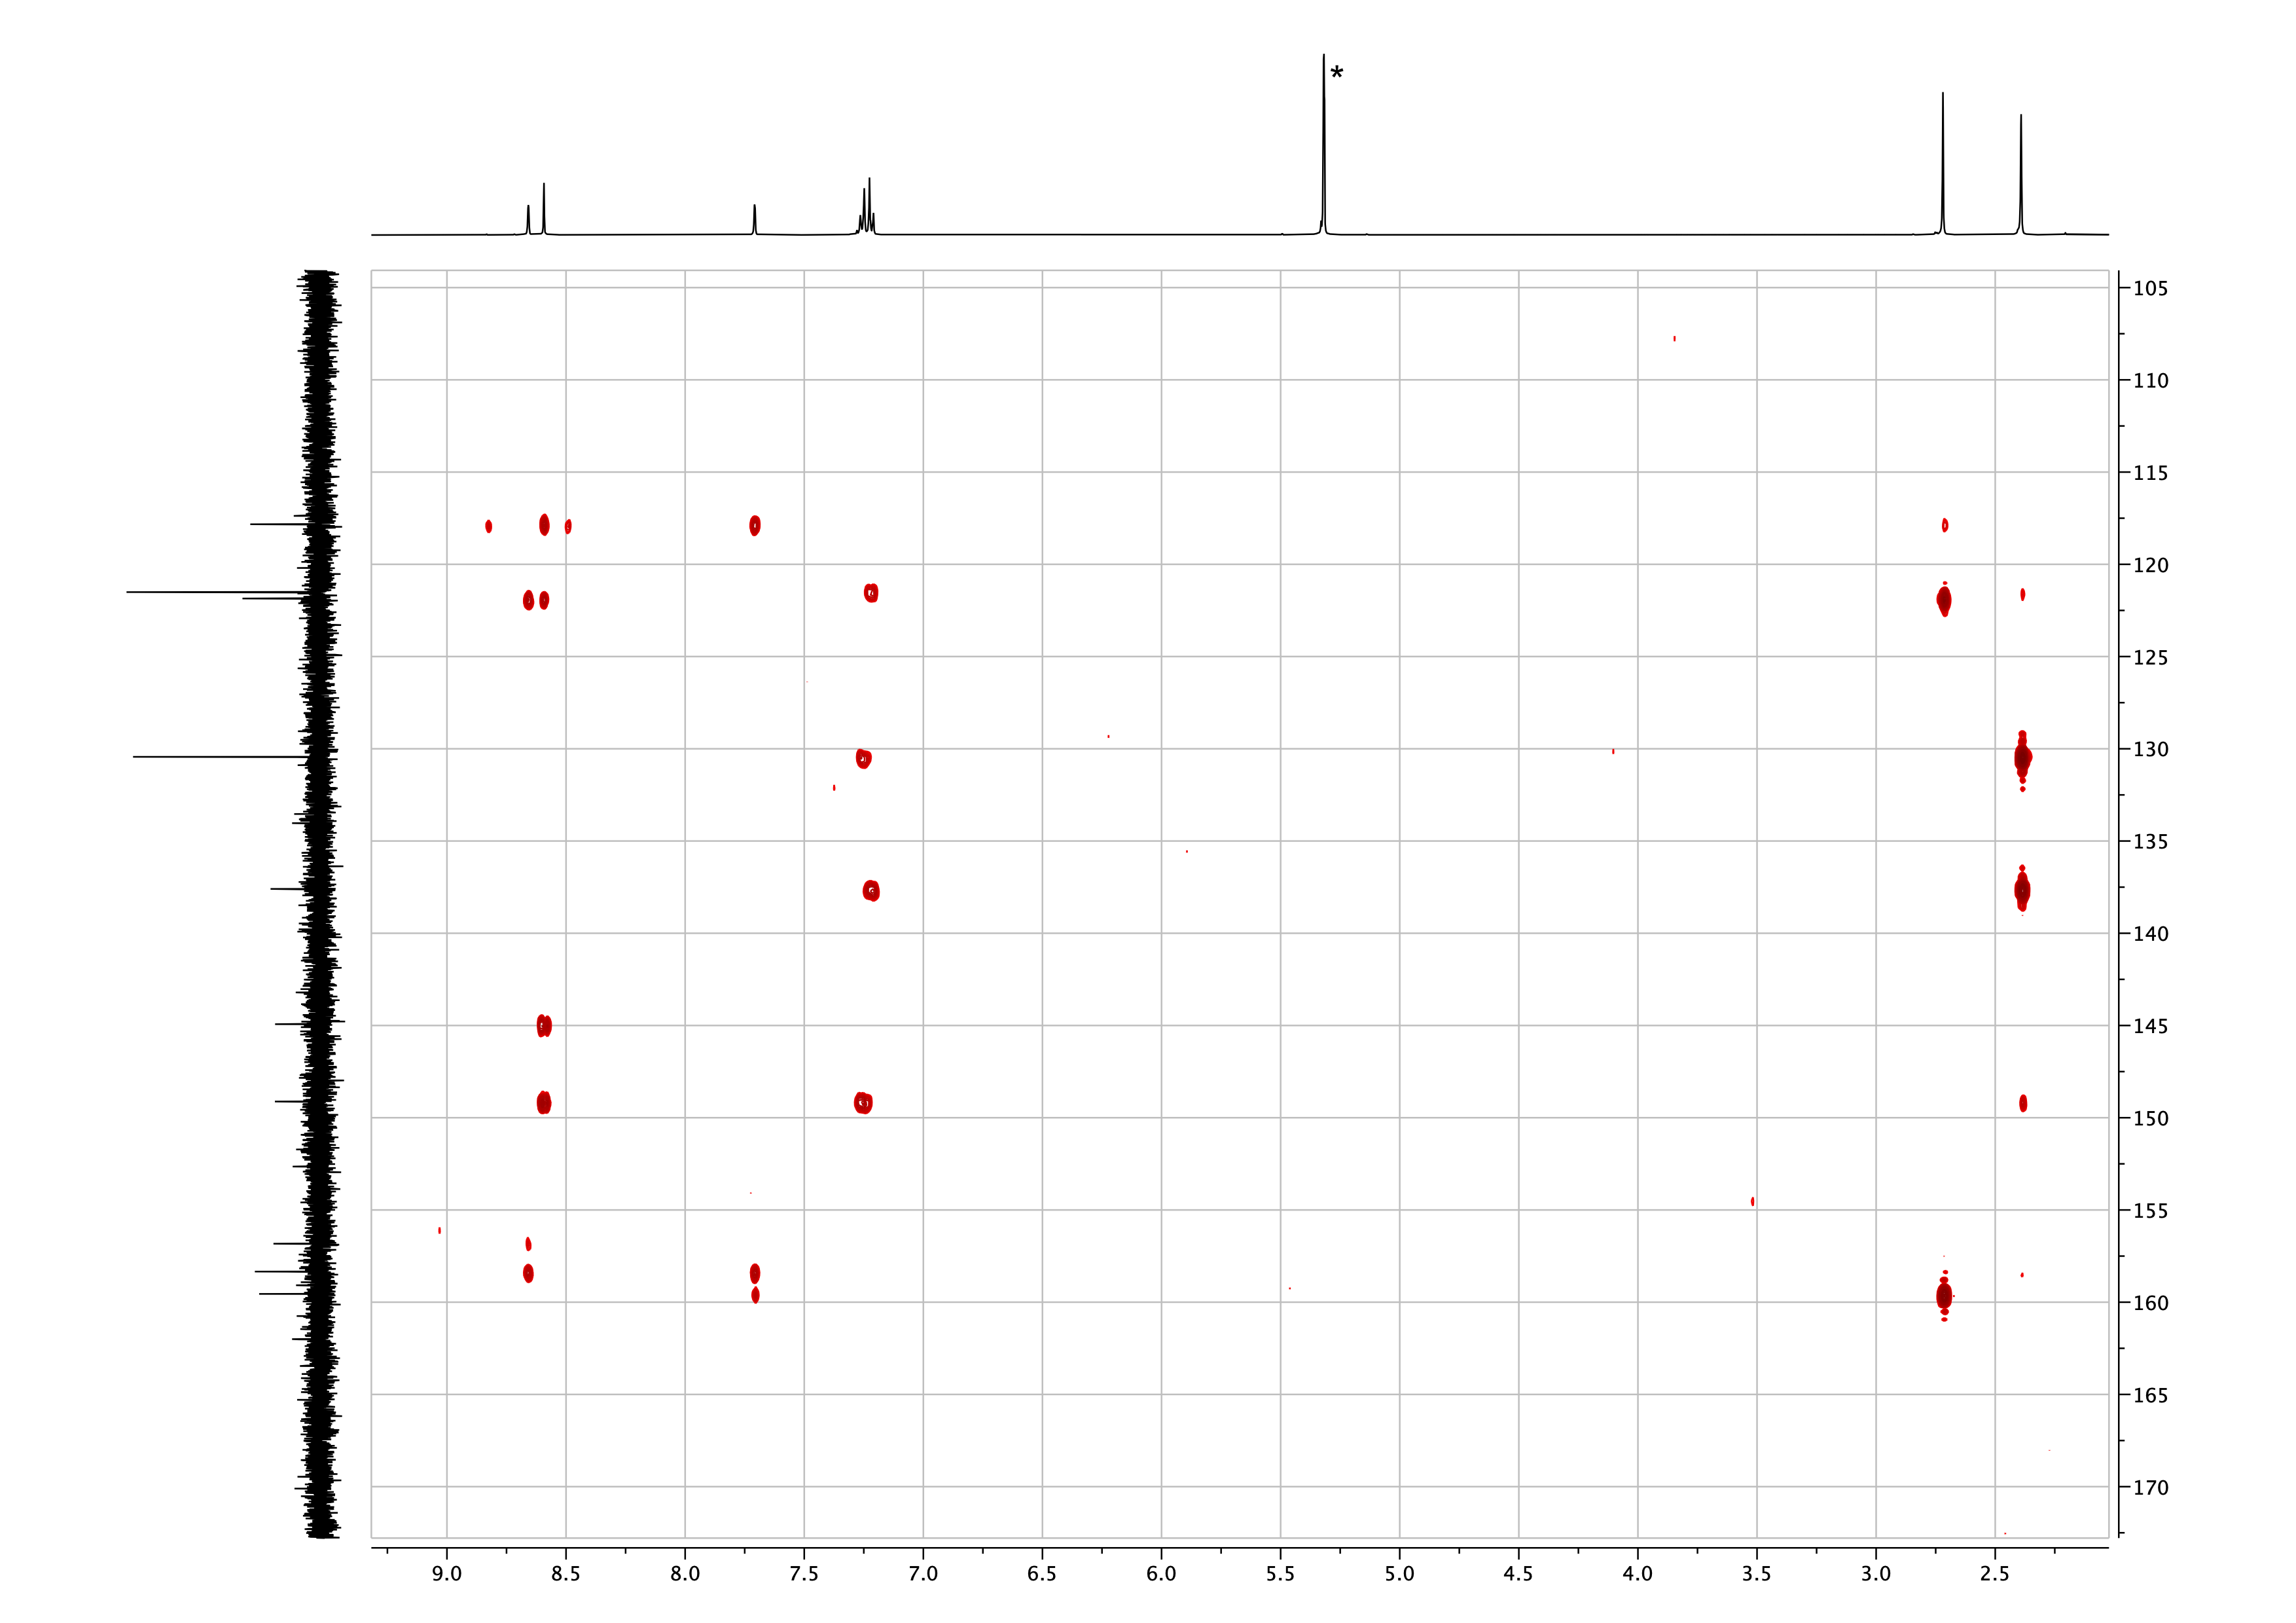


Figure S10. HMBC of ligand **2** (500 MHz 1H, 126 MHz 13C, CD2Cl2, 298 K). * = residual CHDCl2.


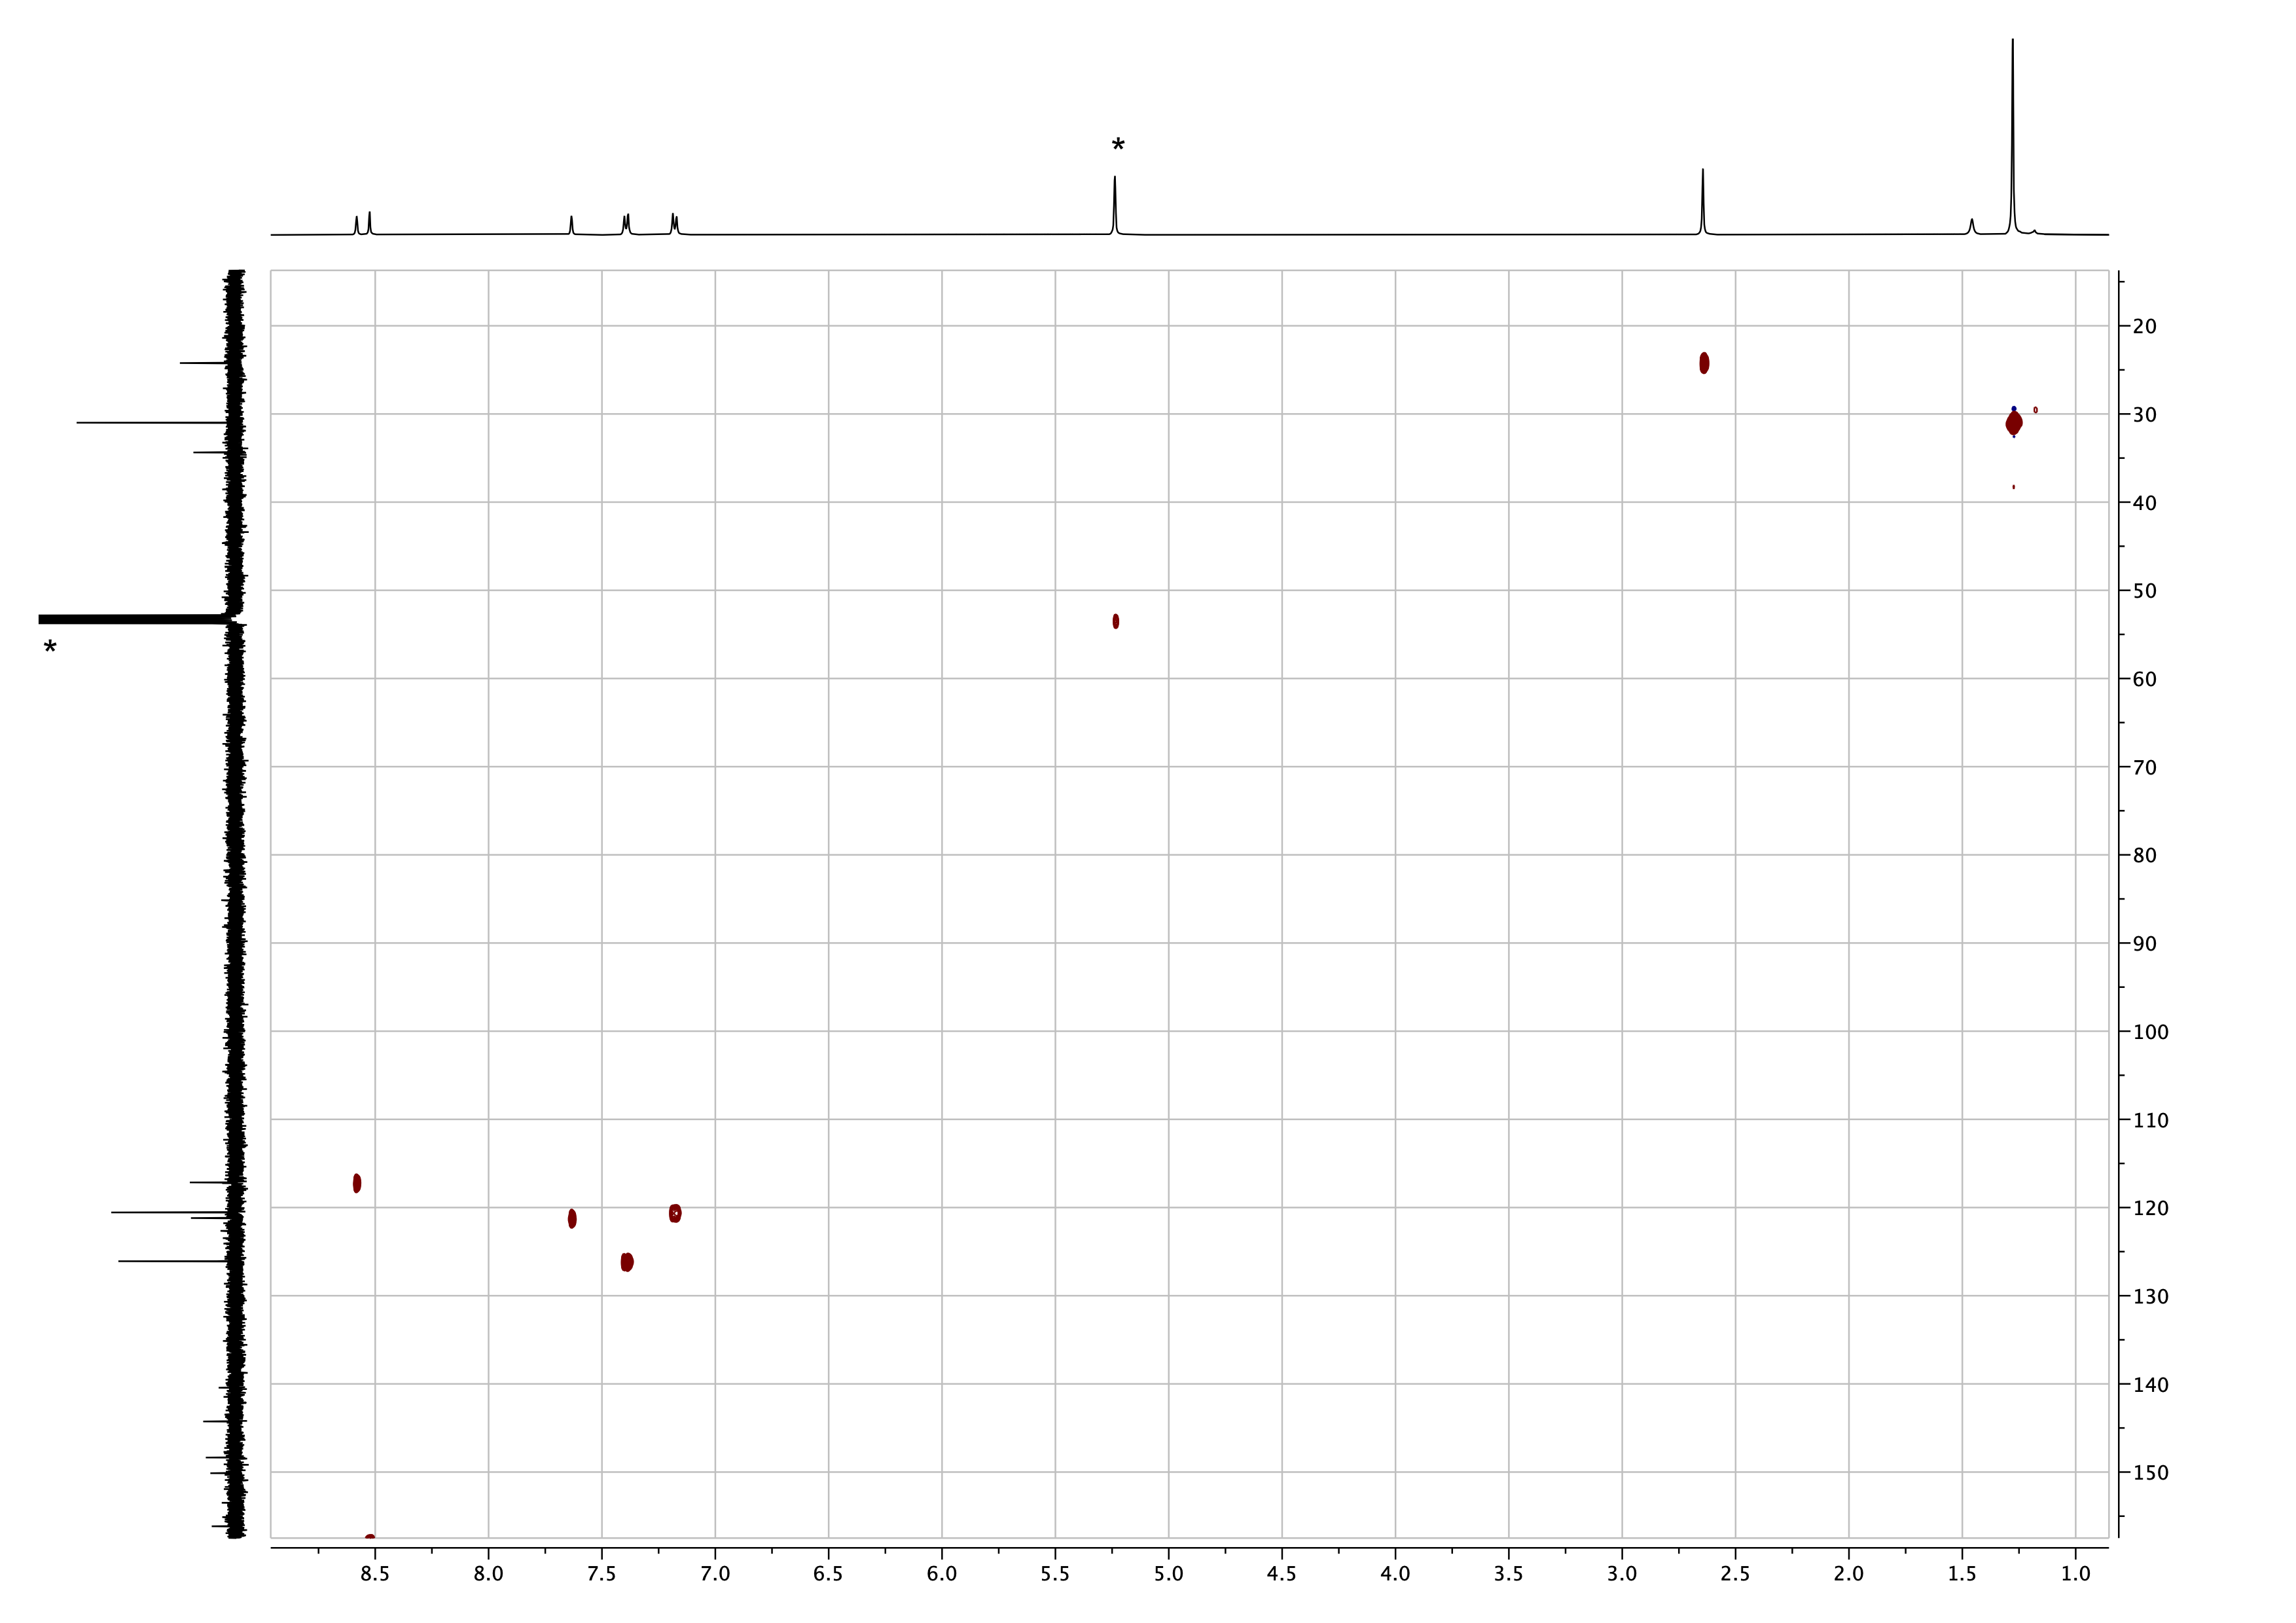


Figure S11. HMQC of ligand **3** (500 MHz 1H, 126 MHz 13C, CD2Cl2, 298 K). * = residual CHDCl2 or CDCl3.


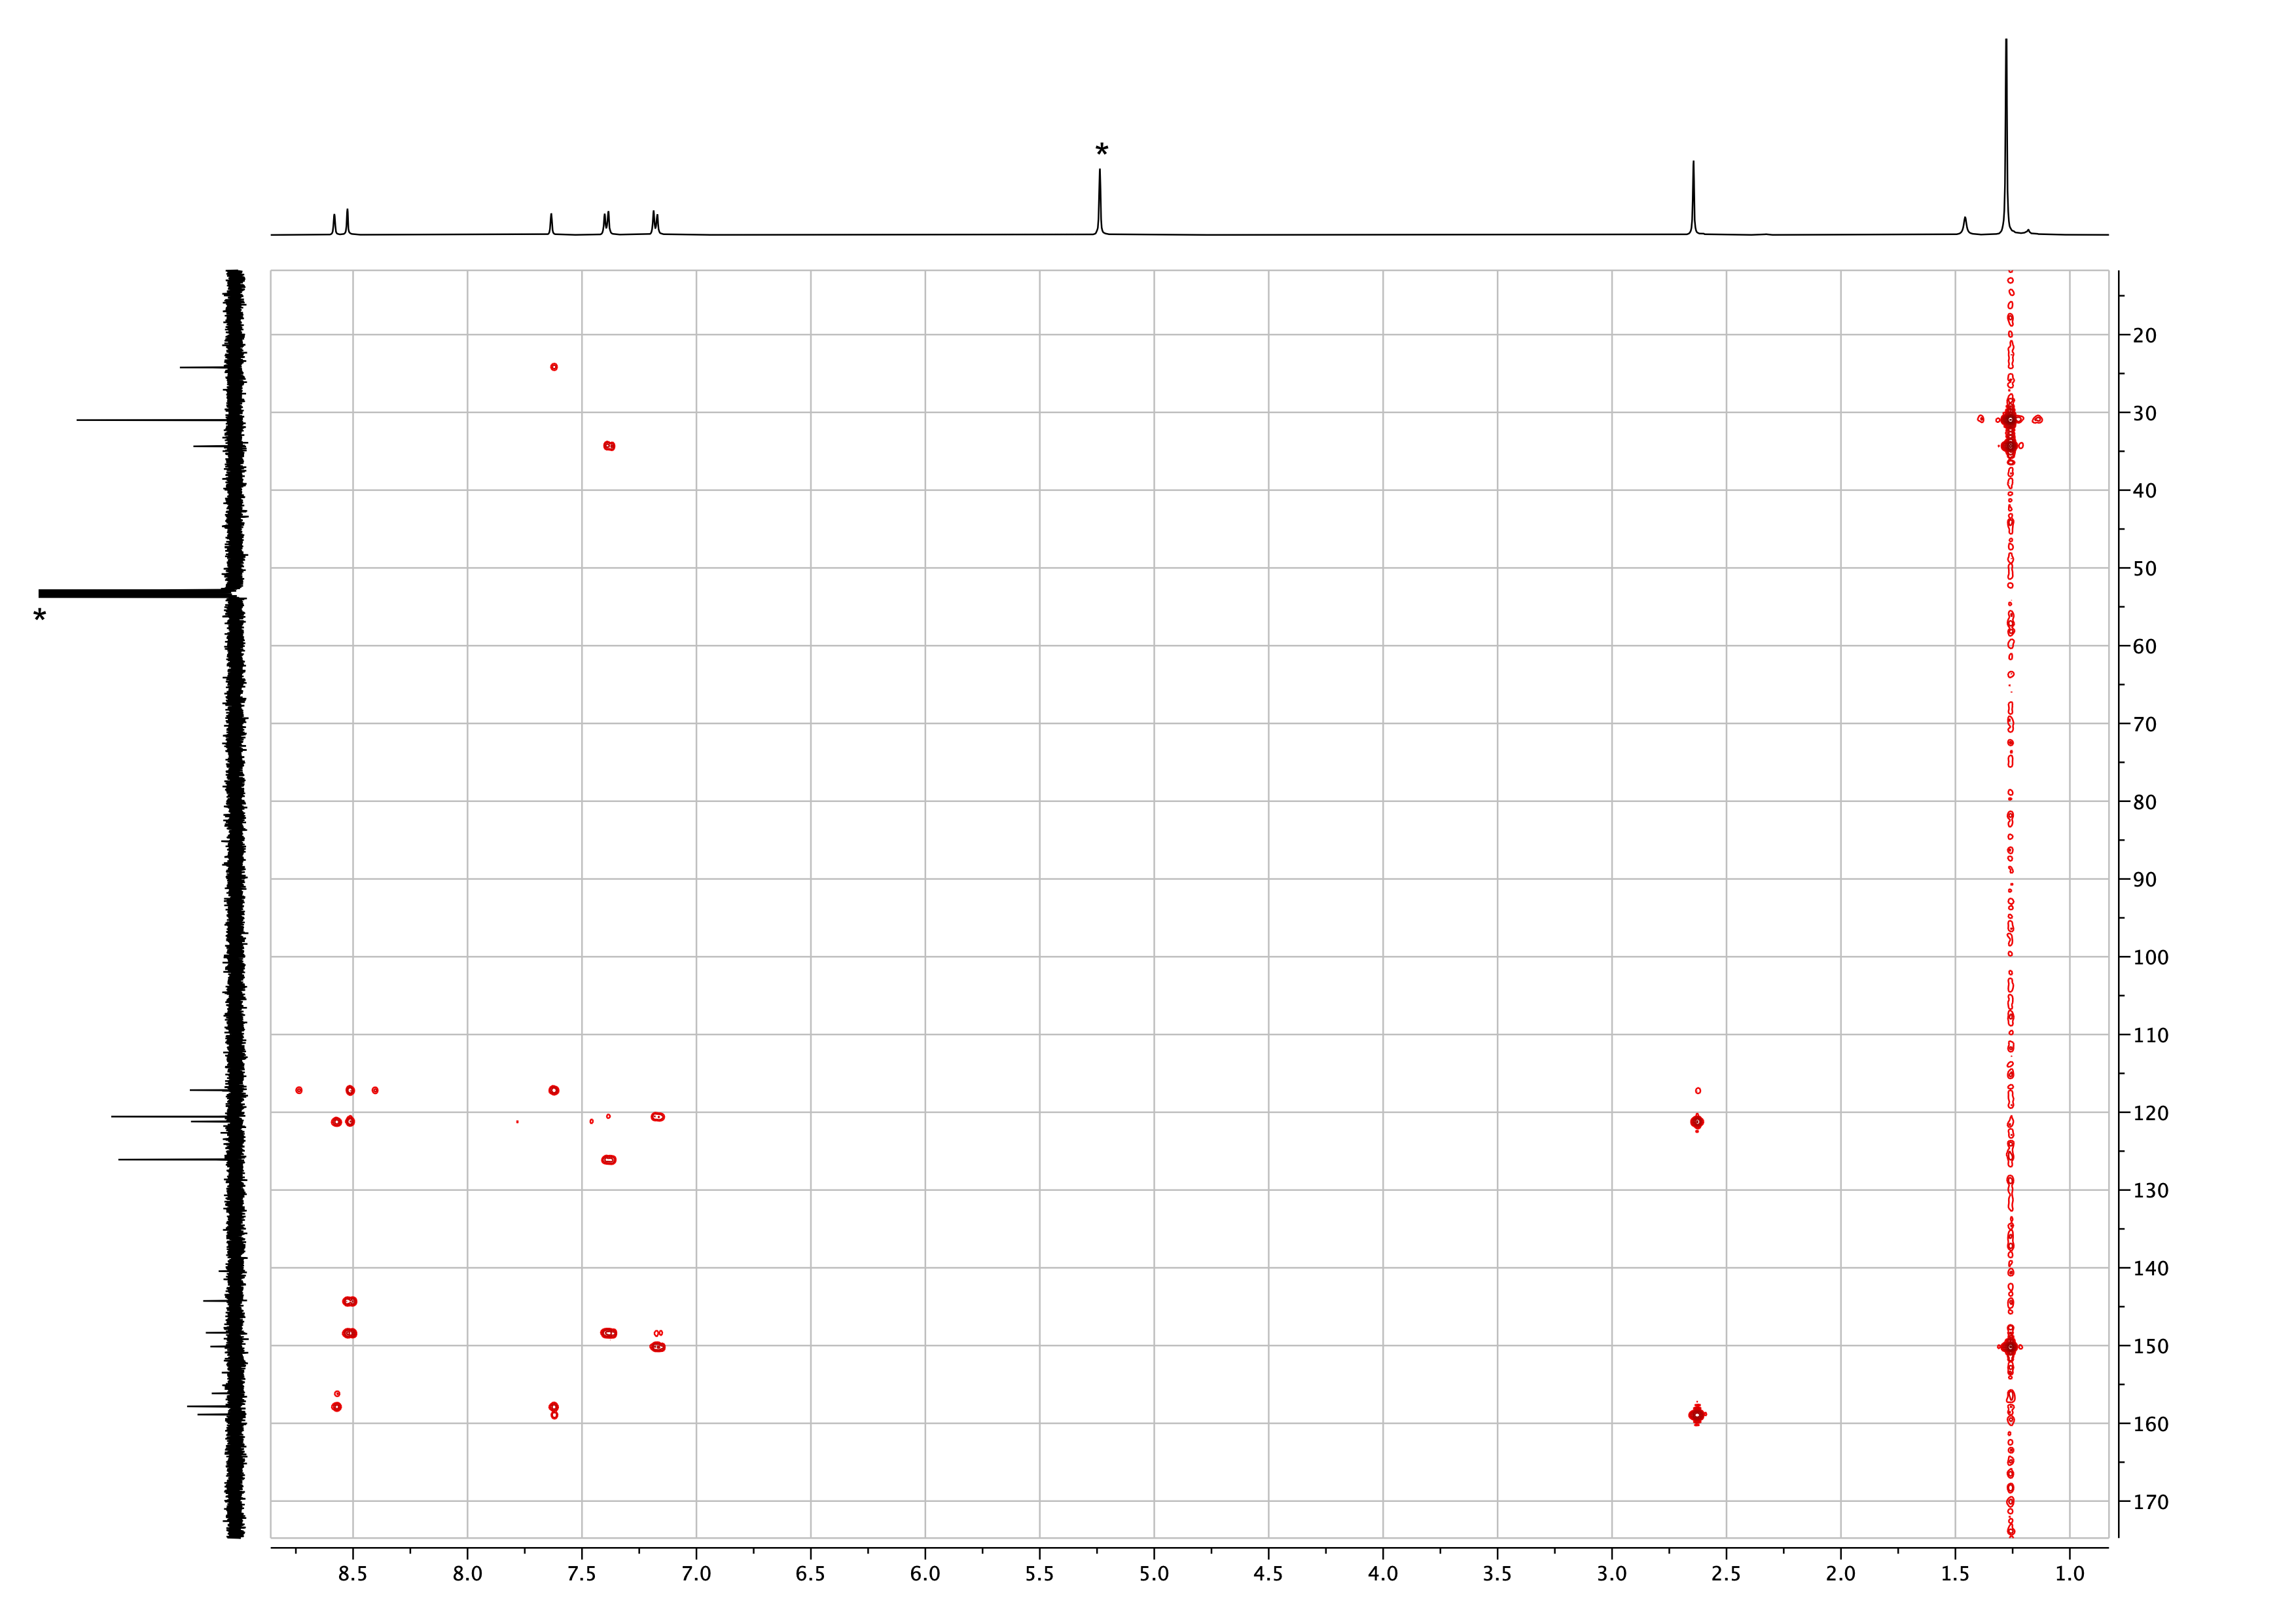


Figure S12. HMBC of ligand **3** (500 MHz 1H, 126 MHz 13C, CD2Cl2, 298 K). * = residual CHDCl2.


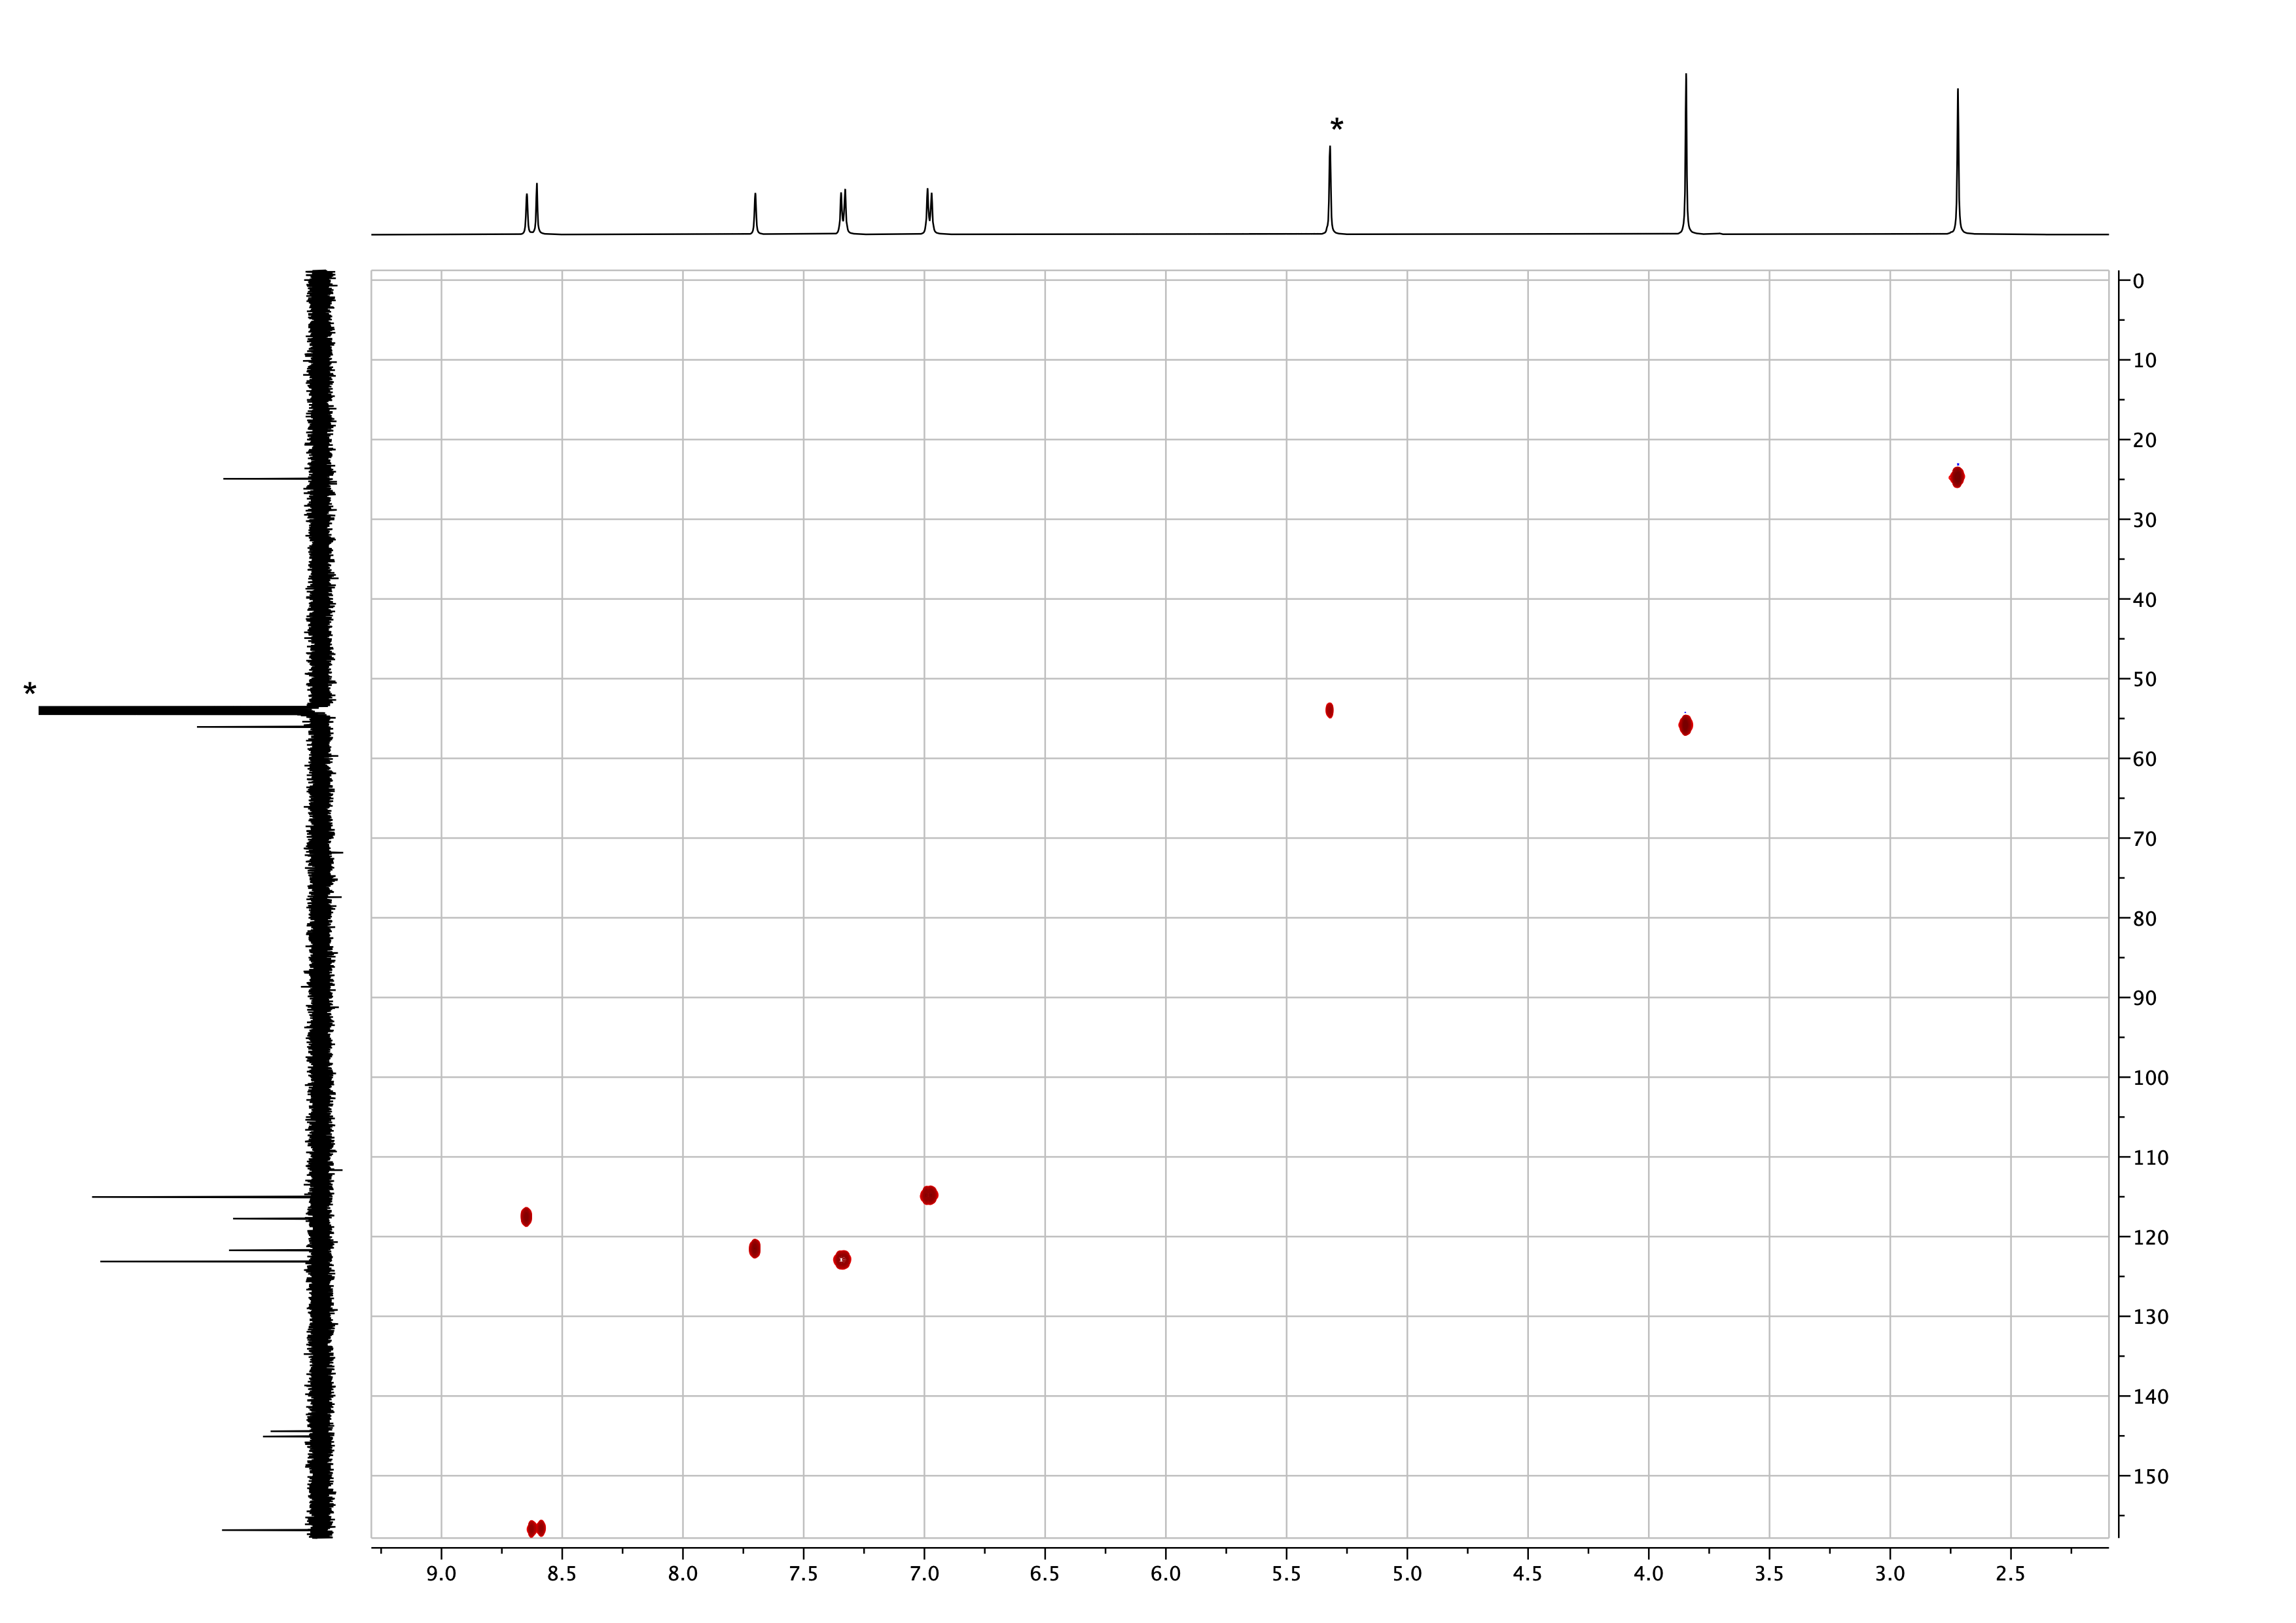


Figure S13. HMQC of ligand **4** (500 MHz 1H, 126 MHz 13C, CD2Cl2, 298 K). * = residual CHDCl2 or CDCl3.


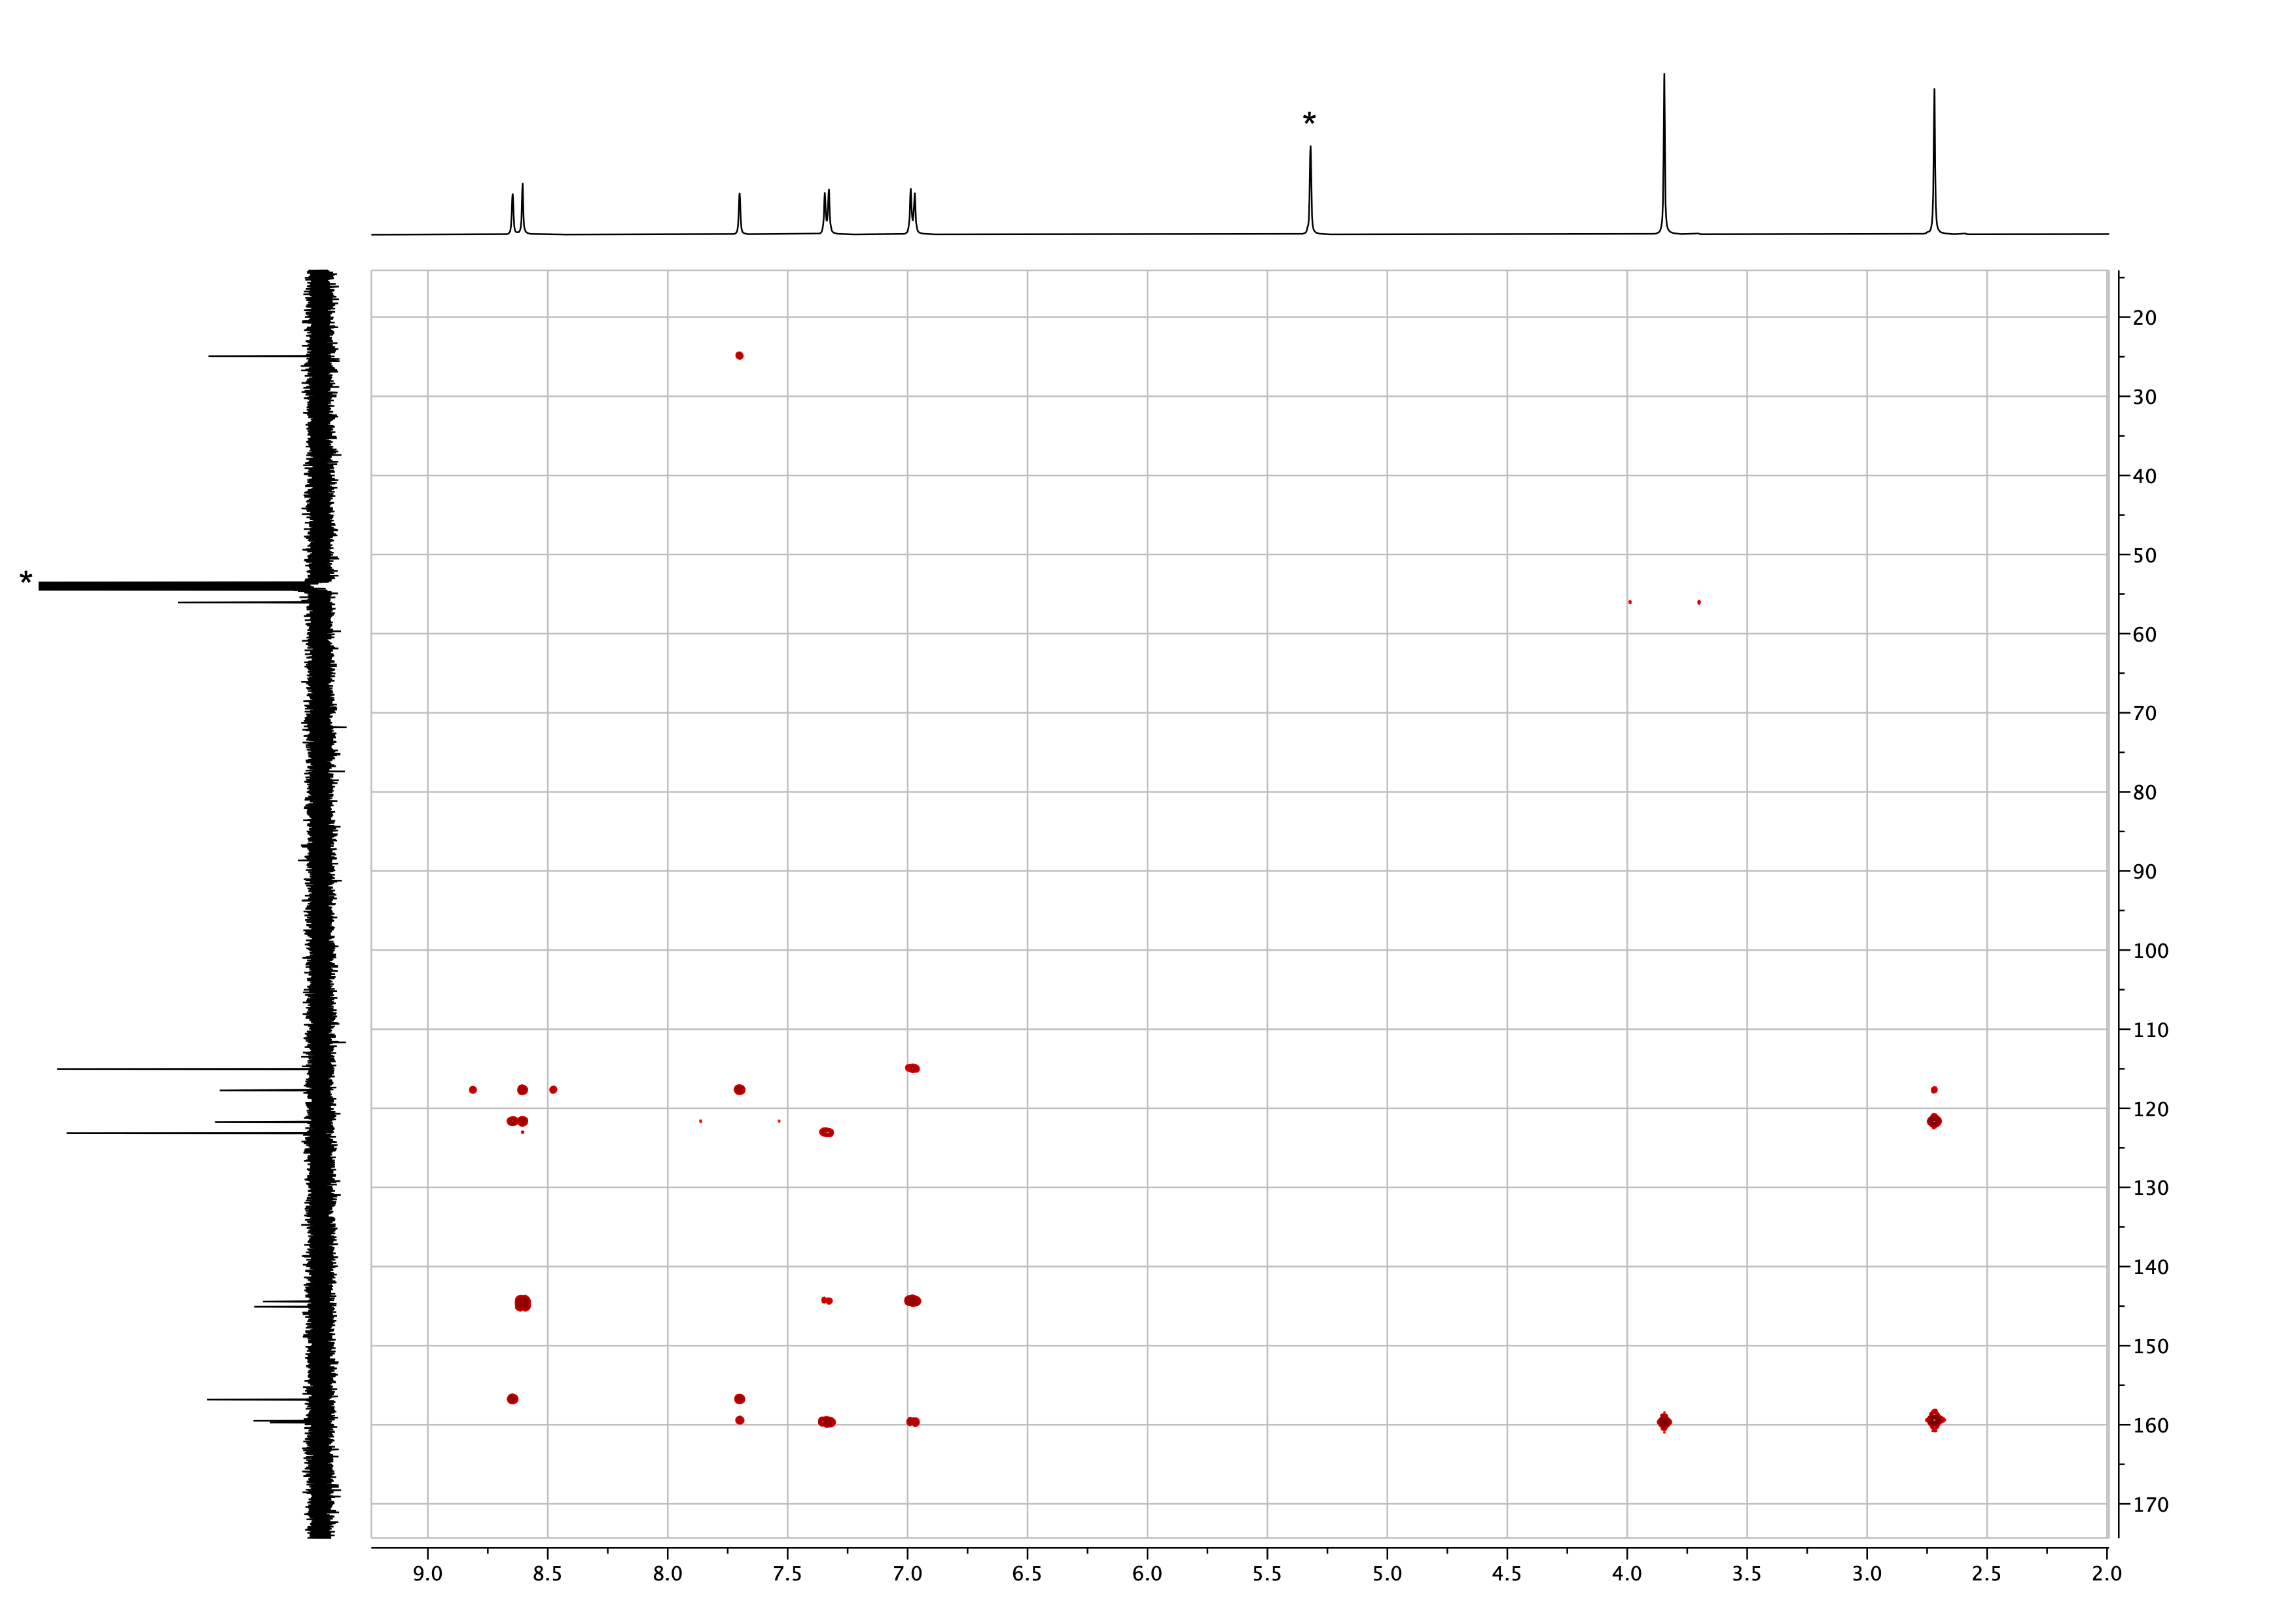


Figure S14. HMBC of ligand **4** (500 MHz 1H, 126 MHz 13C, CD2Cl2, 298 K). * = residual CHDCl2 or CDCl3.


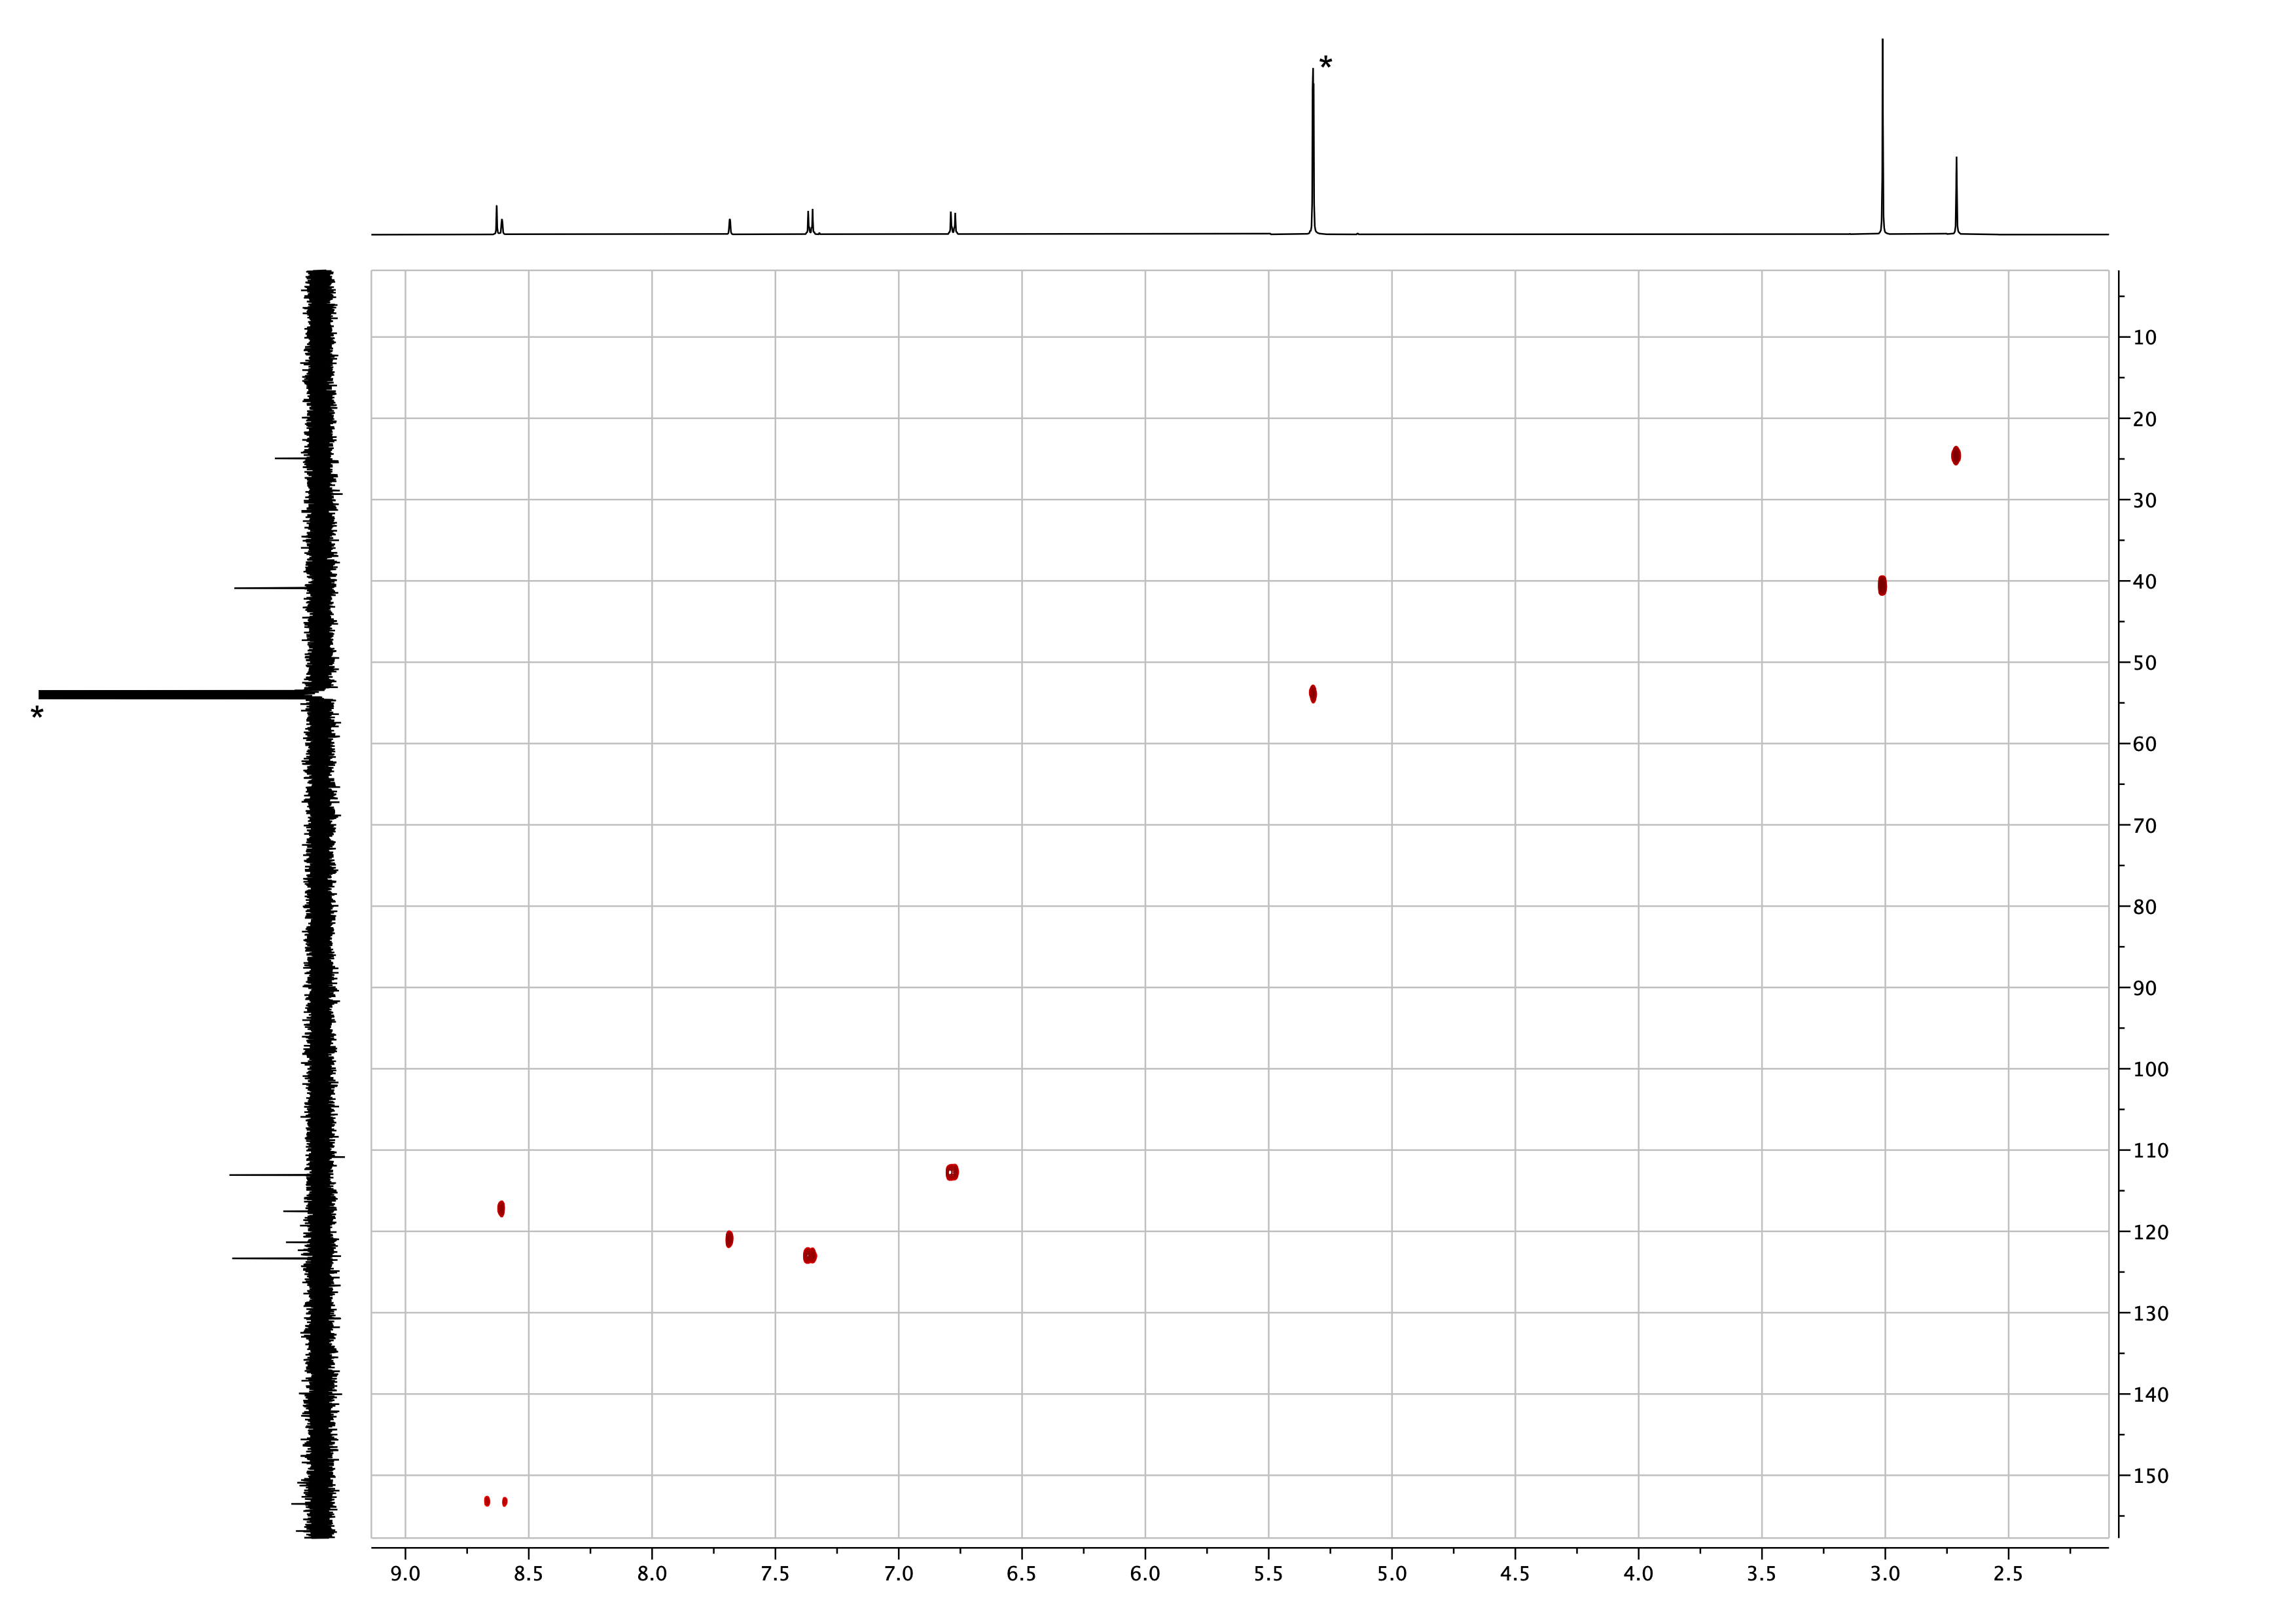


Figure S15. HMQC of ligand **5** (500 MHz 1H, 126 MHz 13C, CD2Cl2, 298 K). * = residual CHDCl2 or CDCl3.


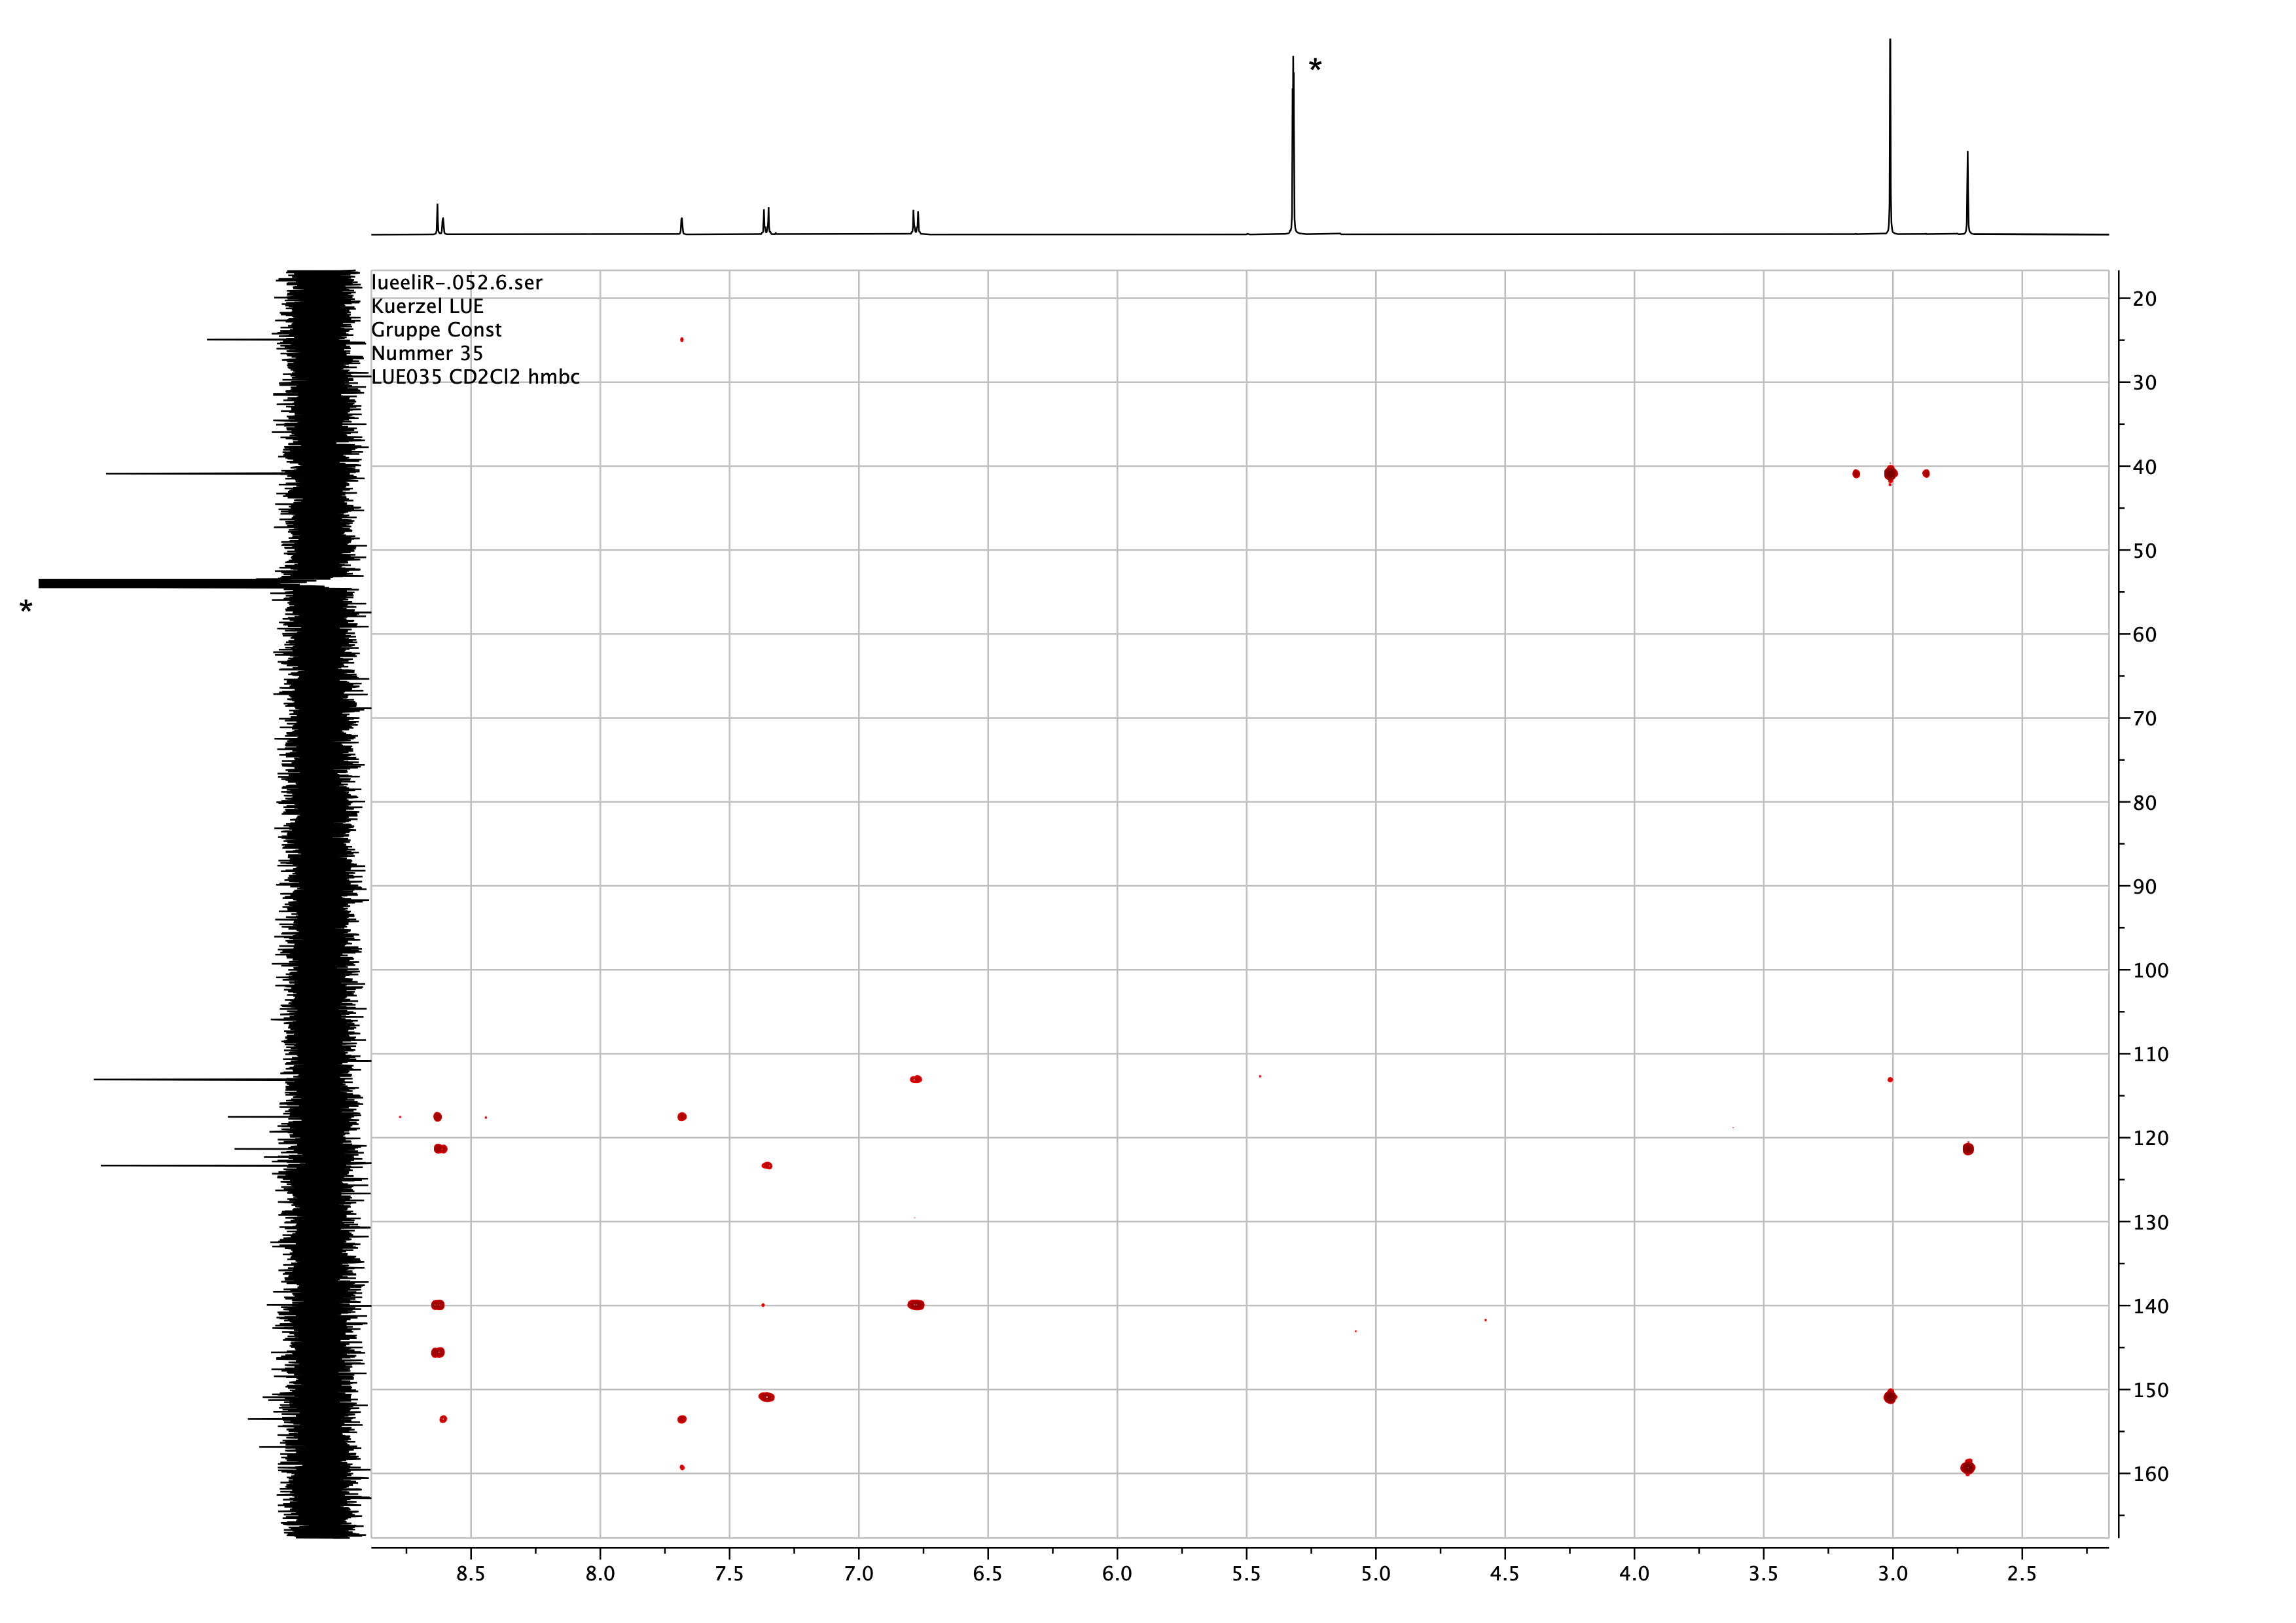


Figure S16. HMBC of ligand **5** (500 MHz 1H, 126 MHz 13C, CD2Cl2, 298 K). * = residual CHDCl2 or CDCl3.


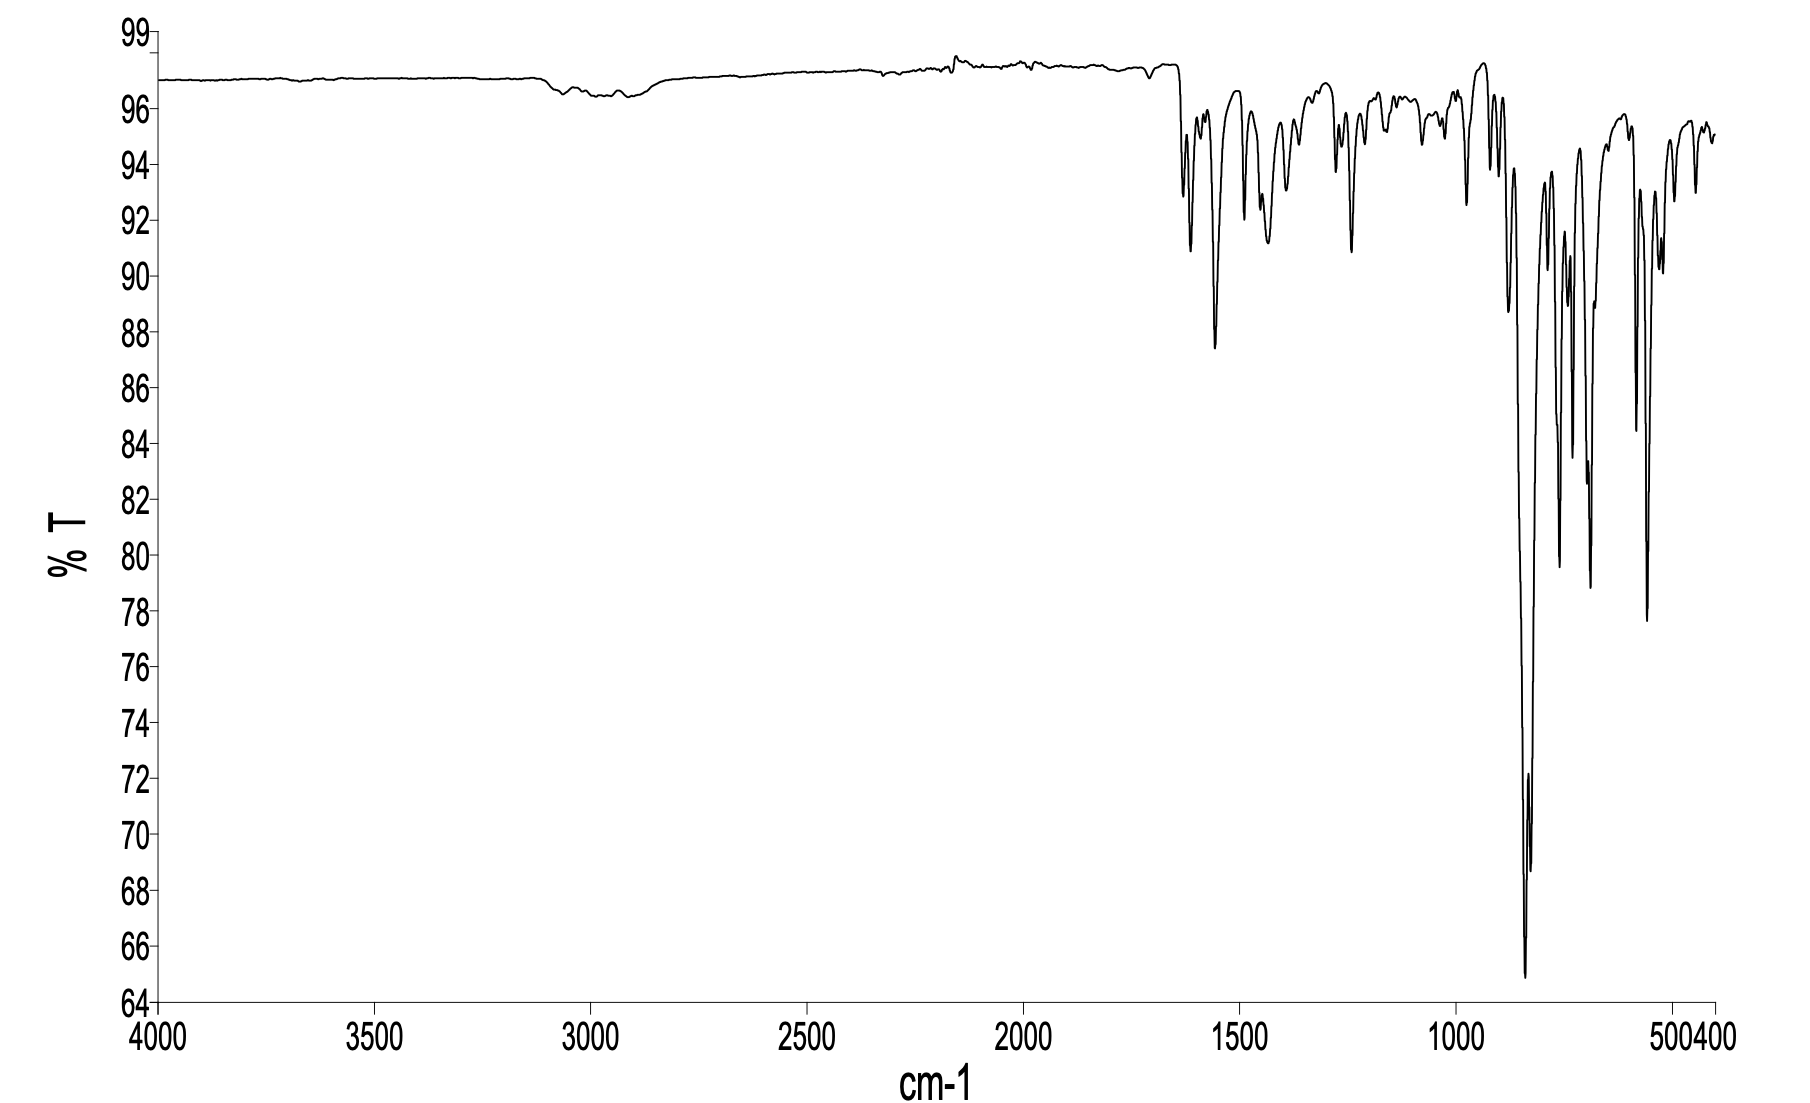


Figure S17. Solid-state FT-IR spectrum of [Cu(**1**)2][PF6].


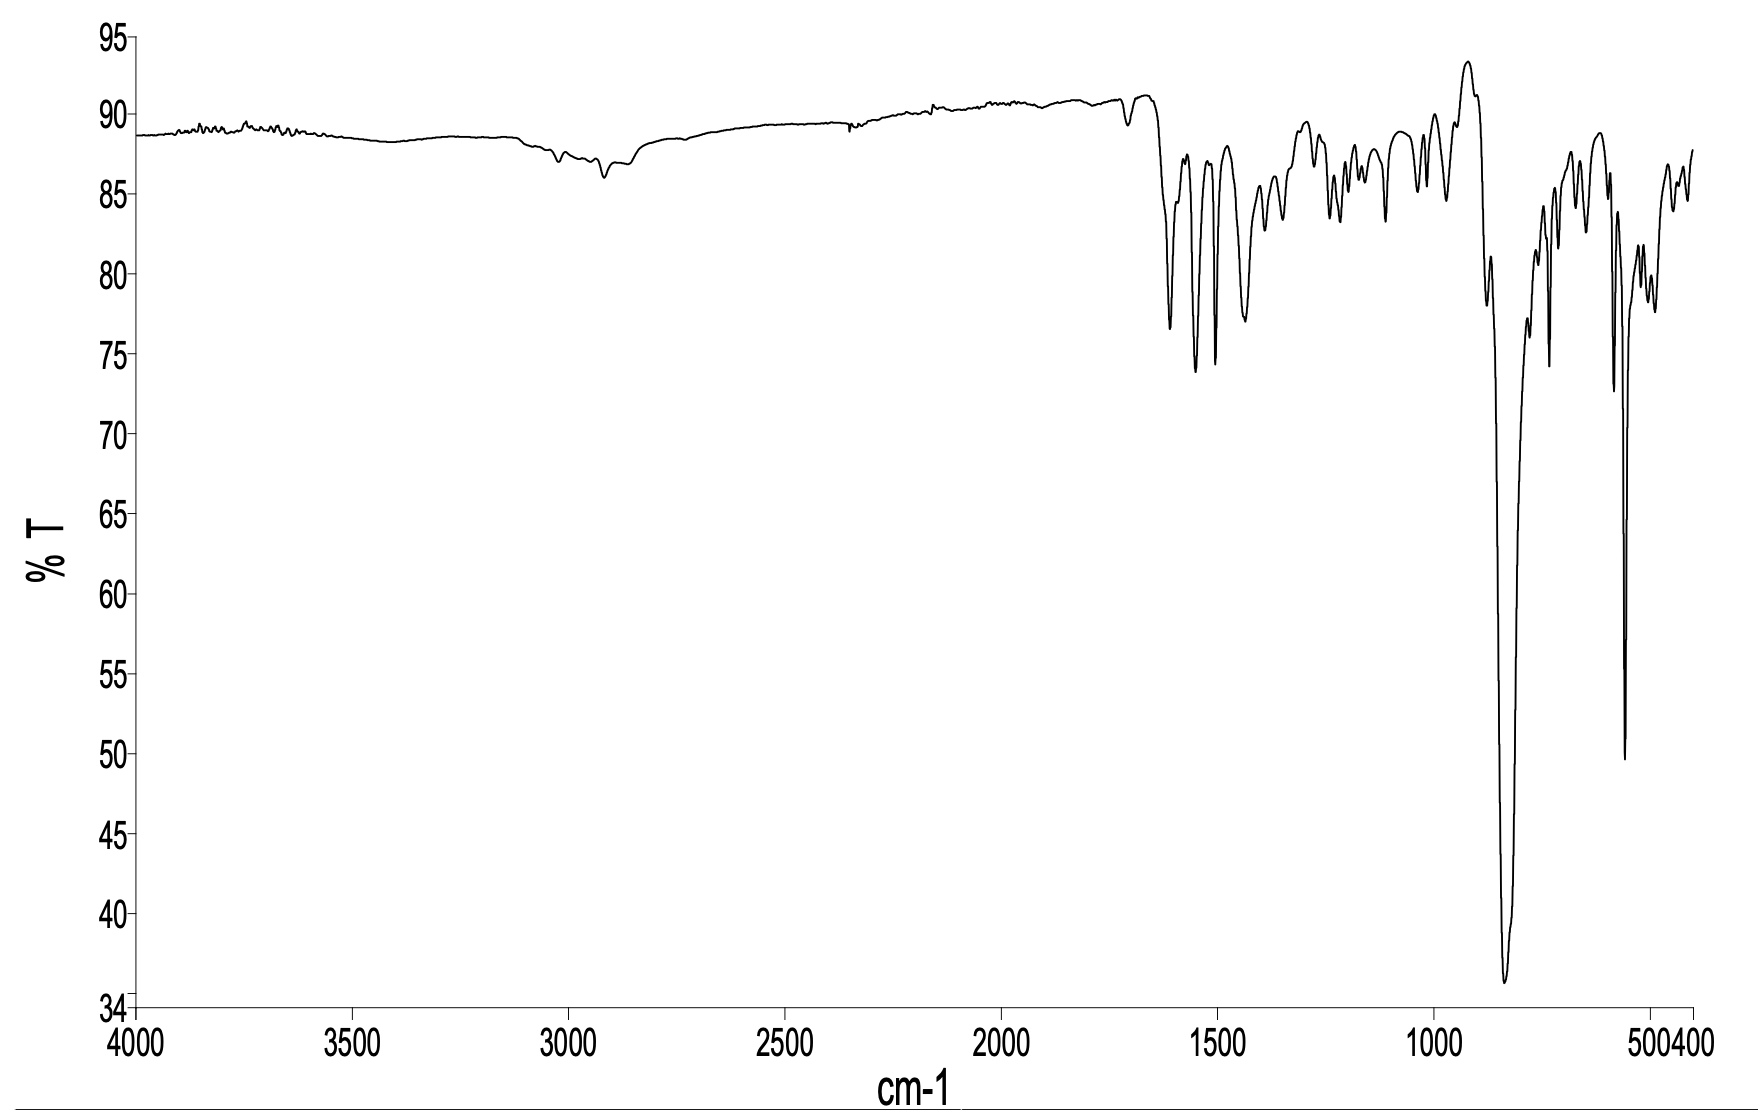


Figure S18. Solid-state FT-IR spectrum of [Cu(**2**)2][PF6].


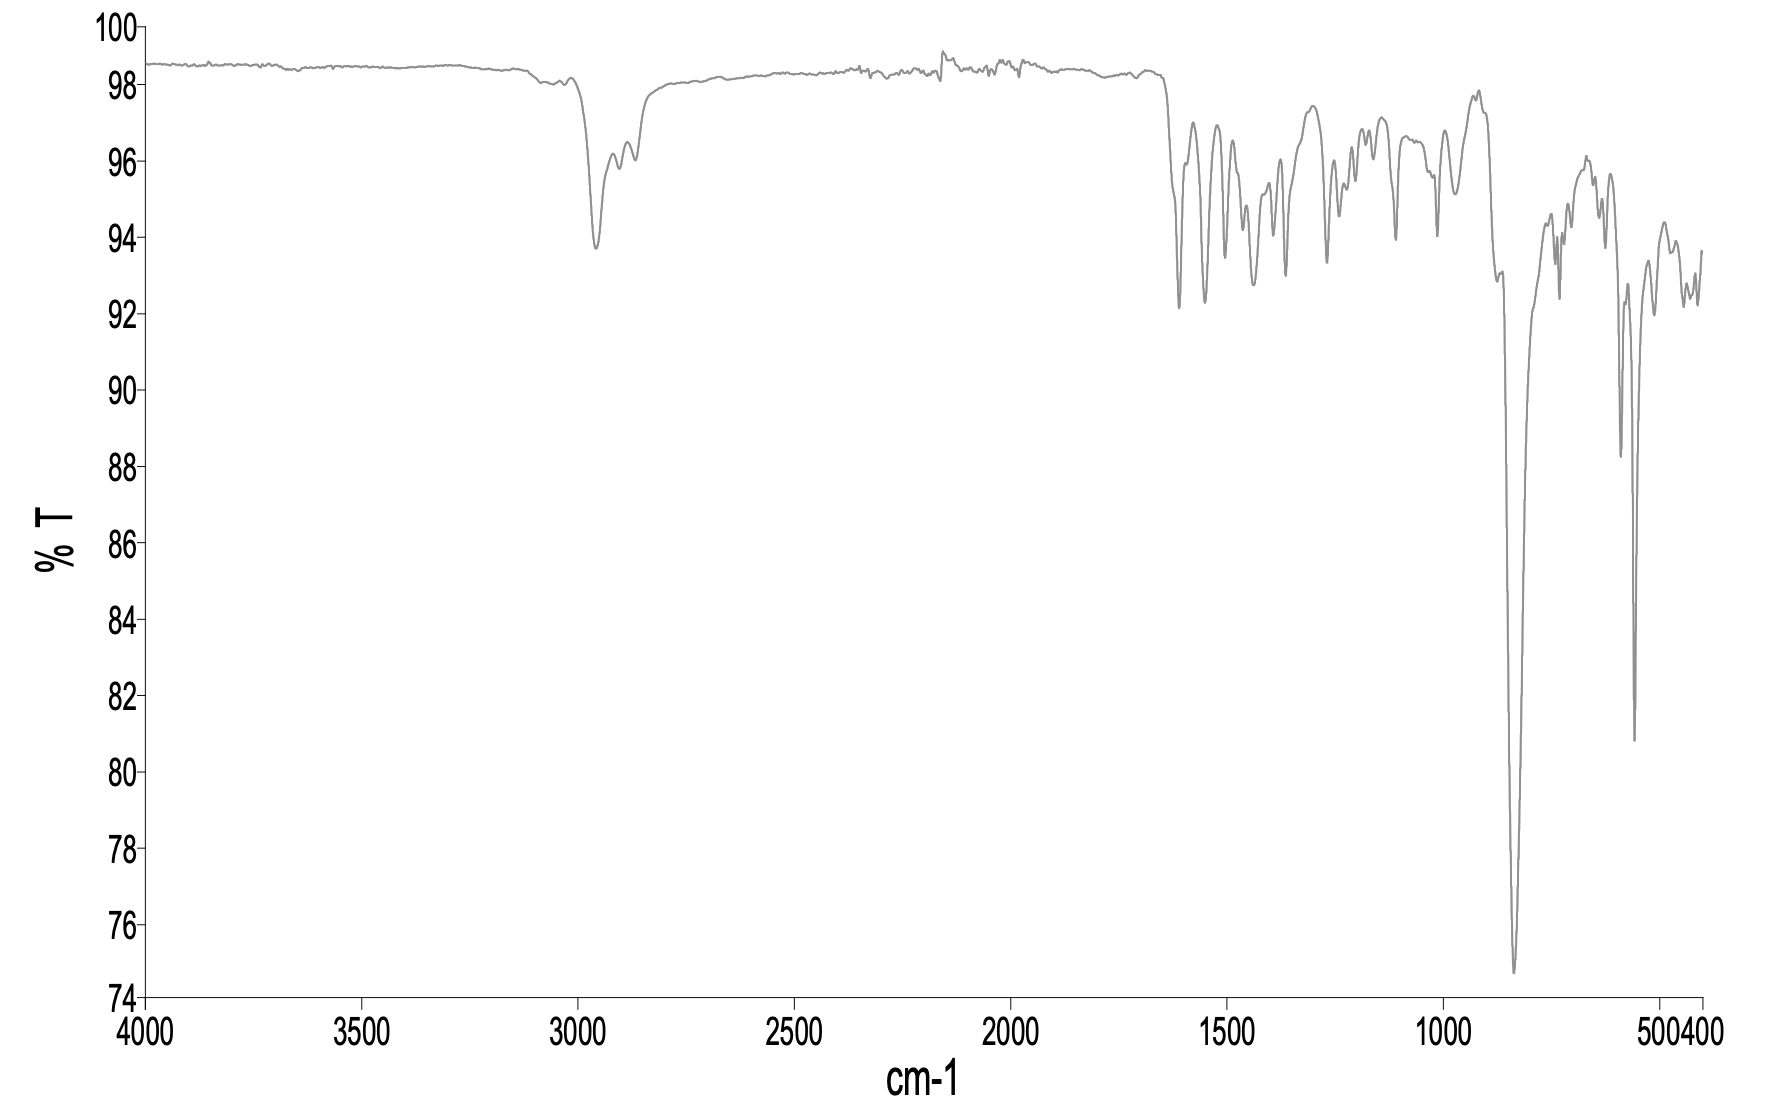


Figure S19. Solid-state FT-IR spectrum of [Cu(**3**)2][PF6].


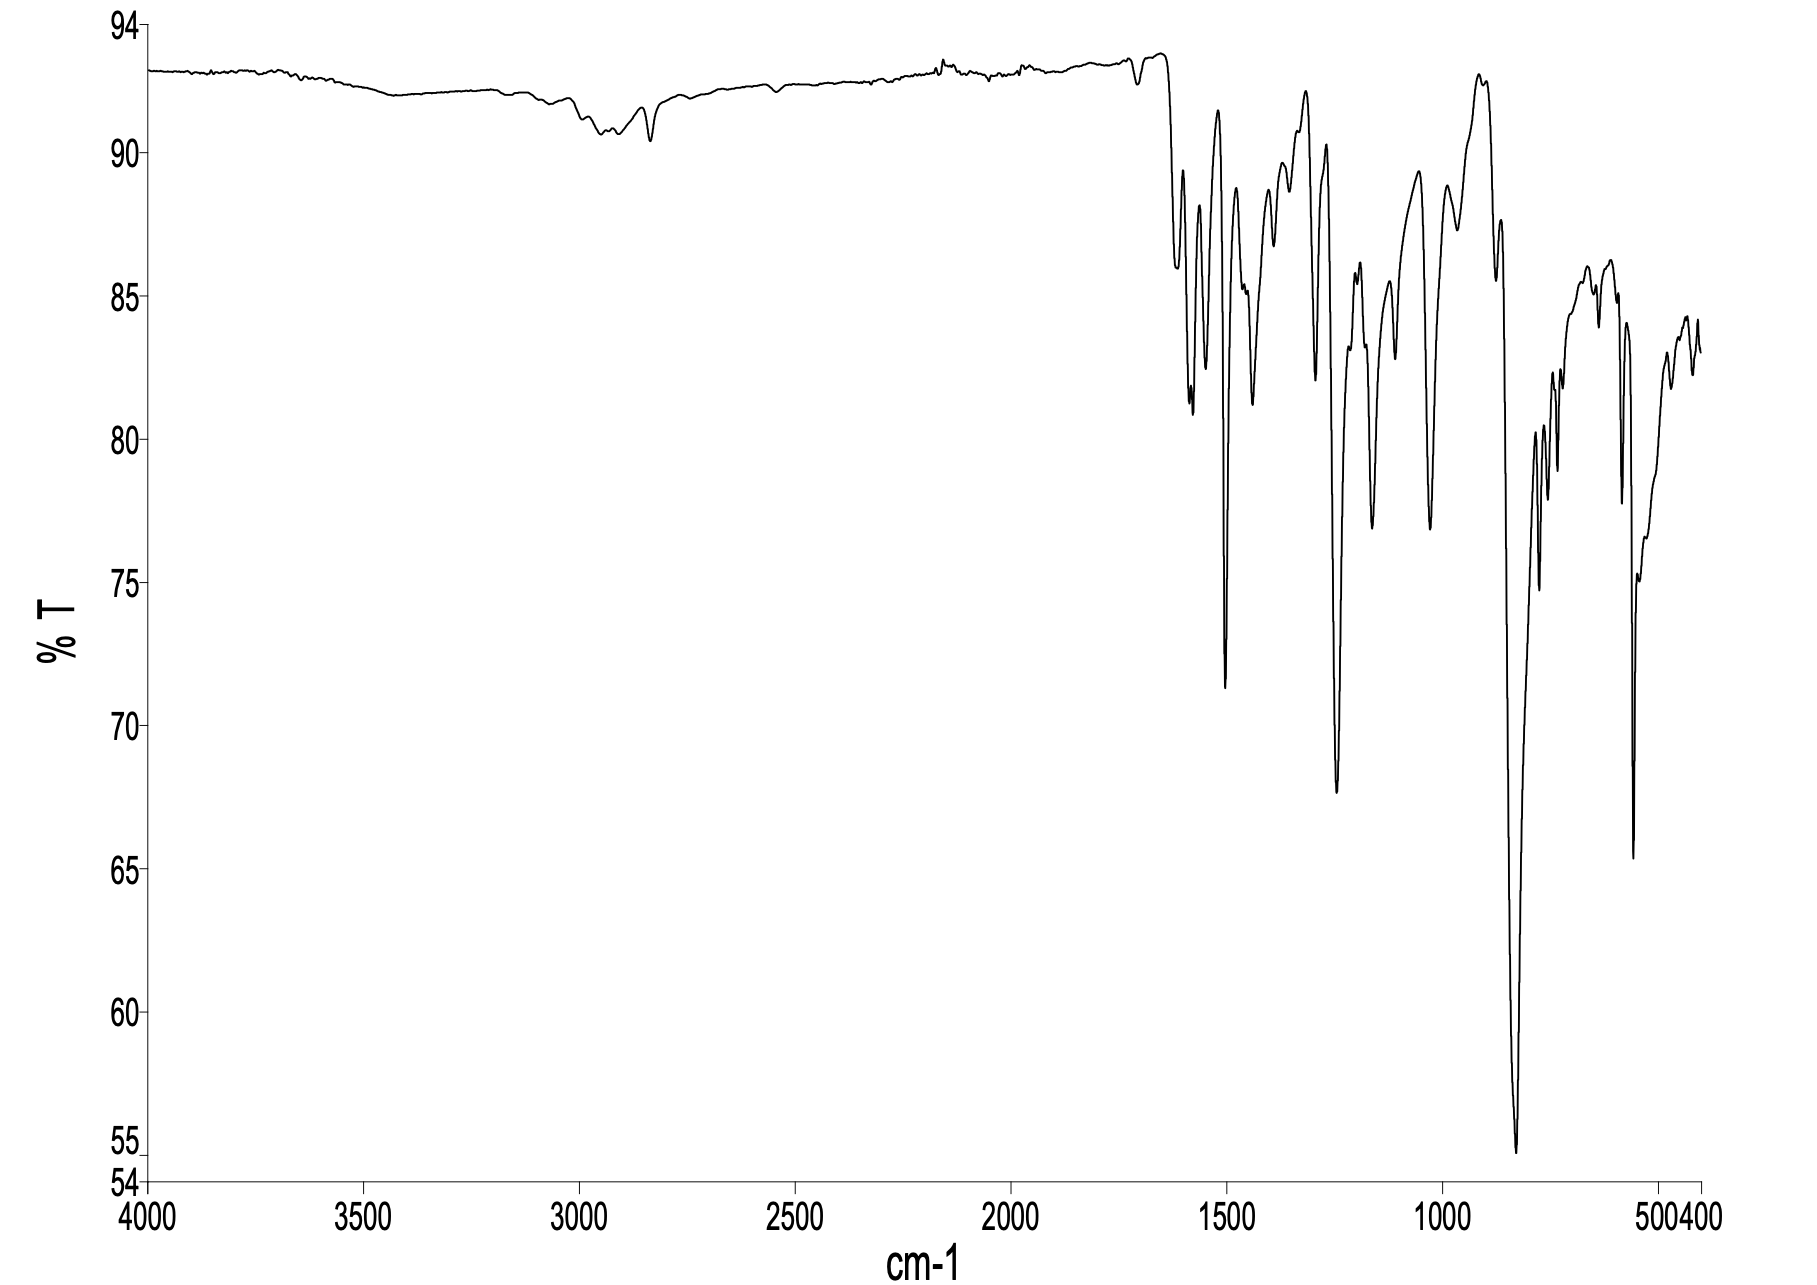


Figure S20. Solid-state FT-IR spectrum of [Cu(**4**)2][PF6].


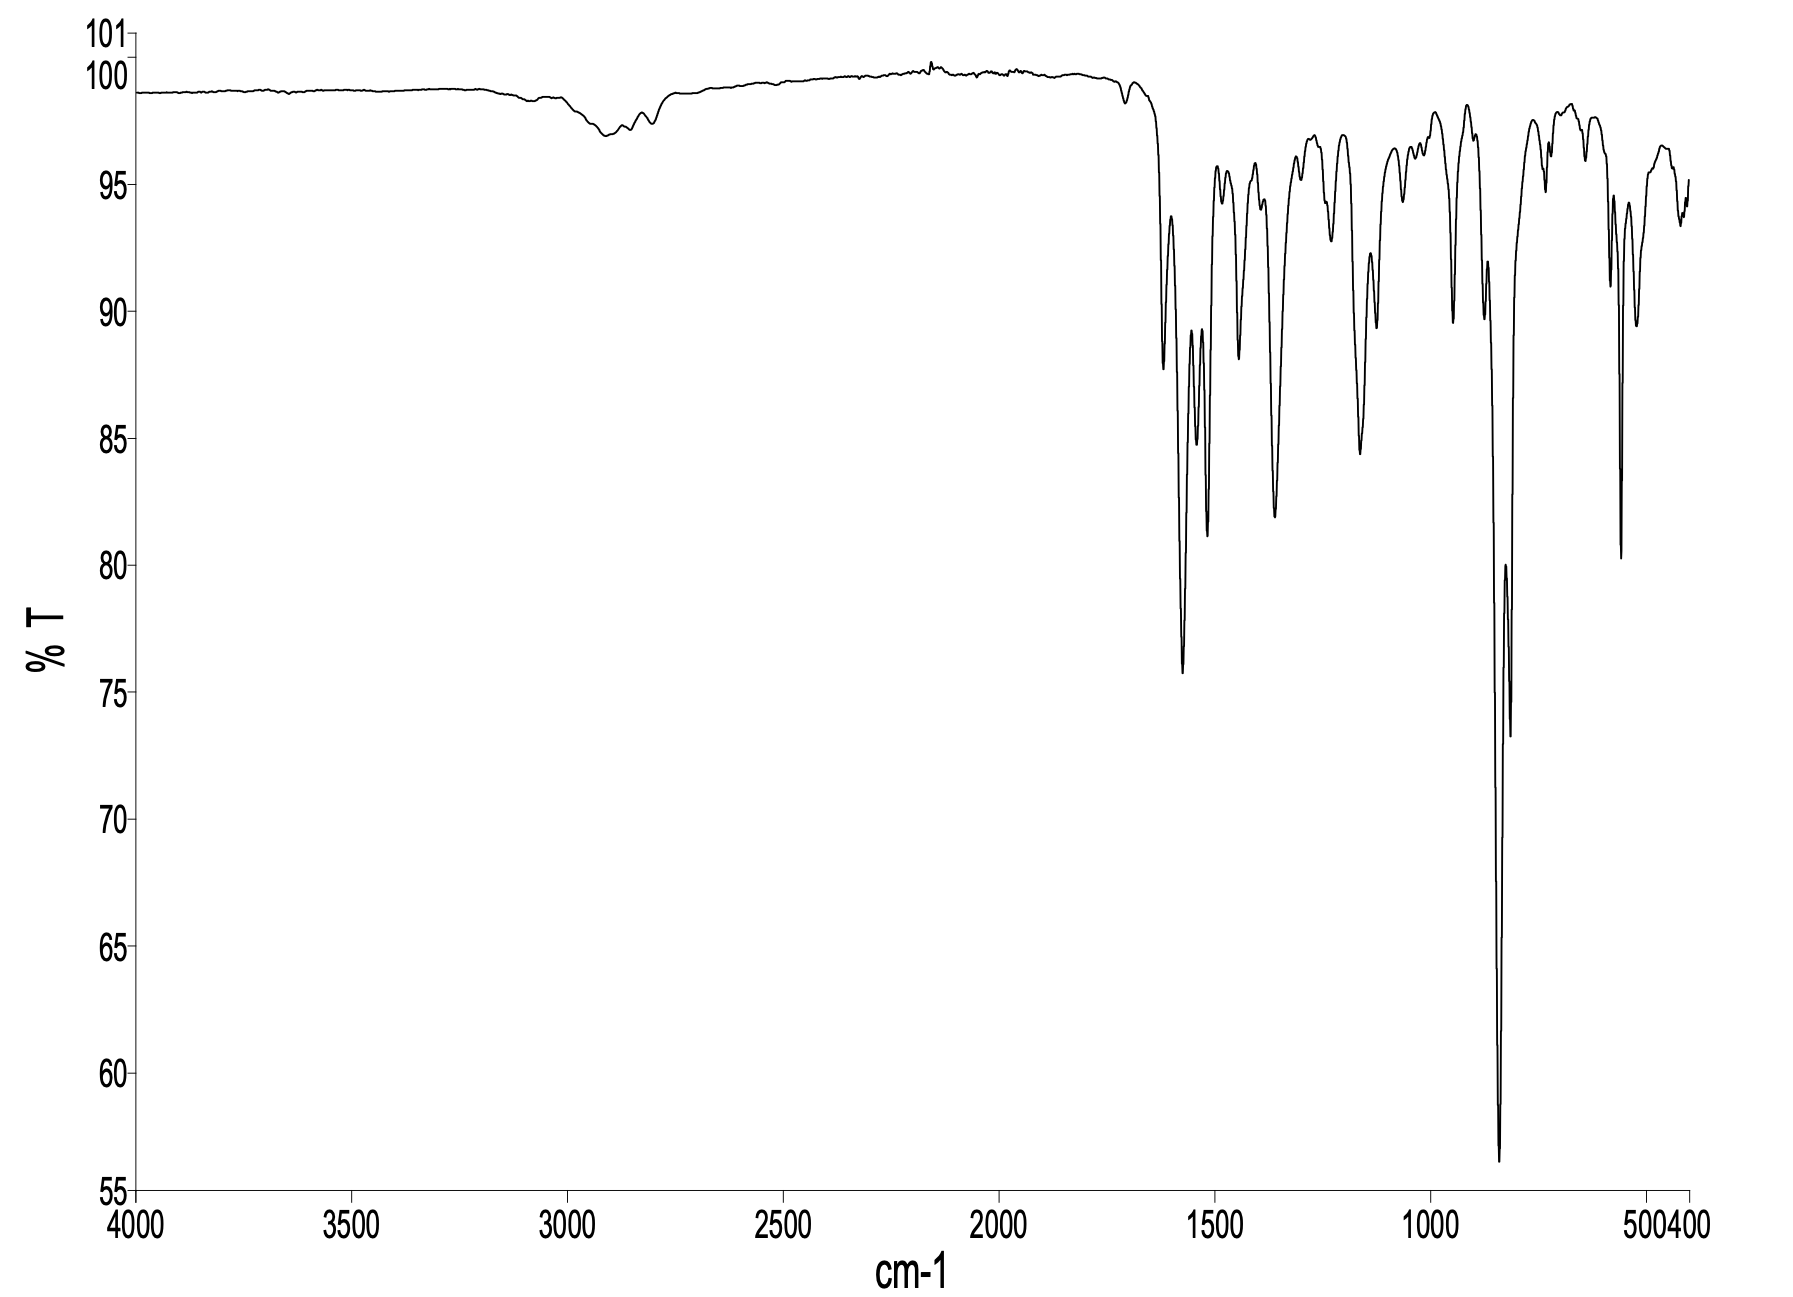


Figure S21. Solid-state FT-IR spectrum of [Cu(**5**)2][PF6].


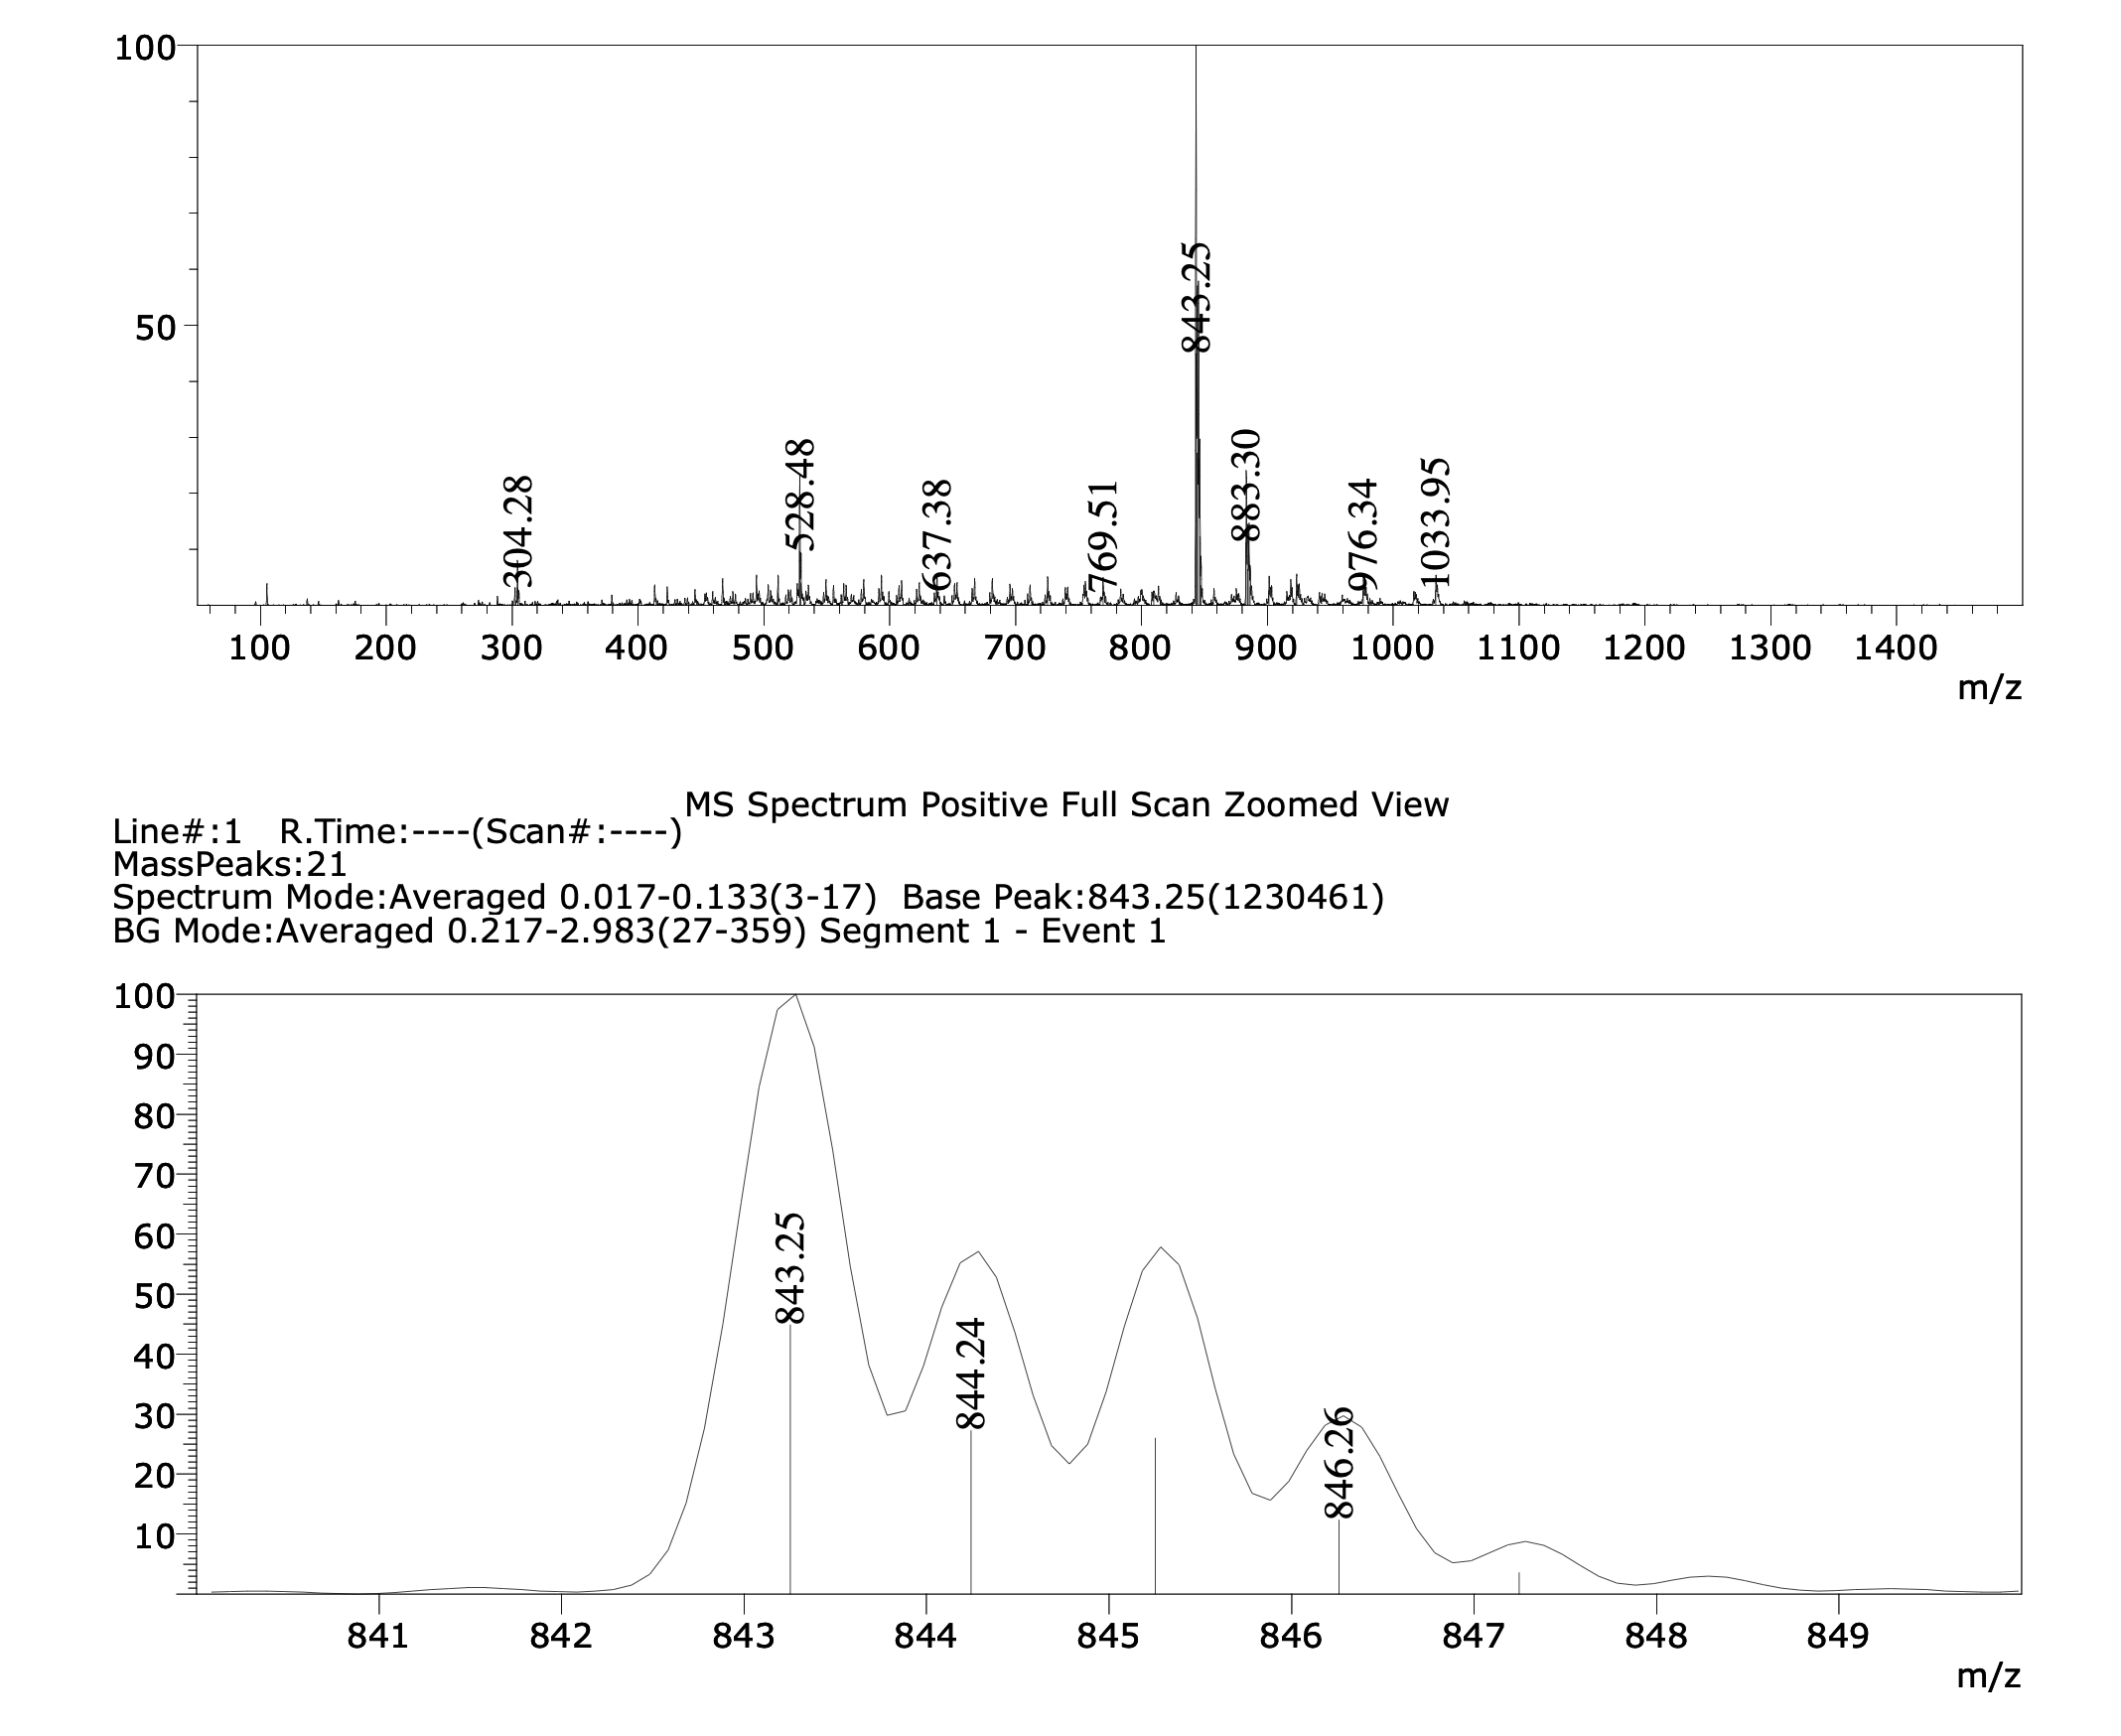


Figure S22. Electrospray mass spectrum of [Cu(**1**)2][PF6].


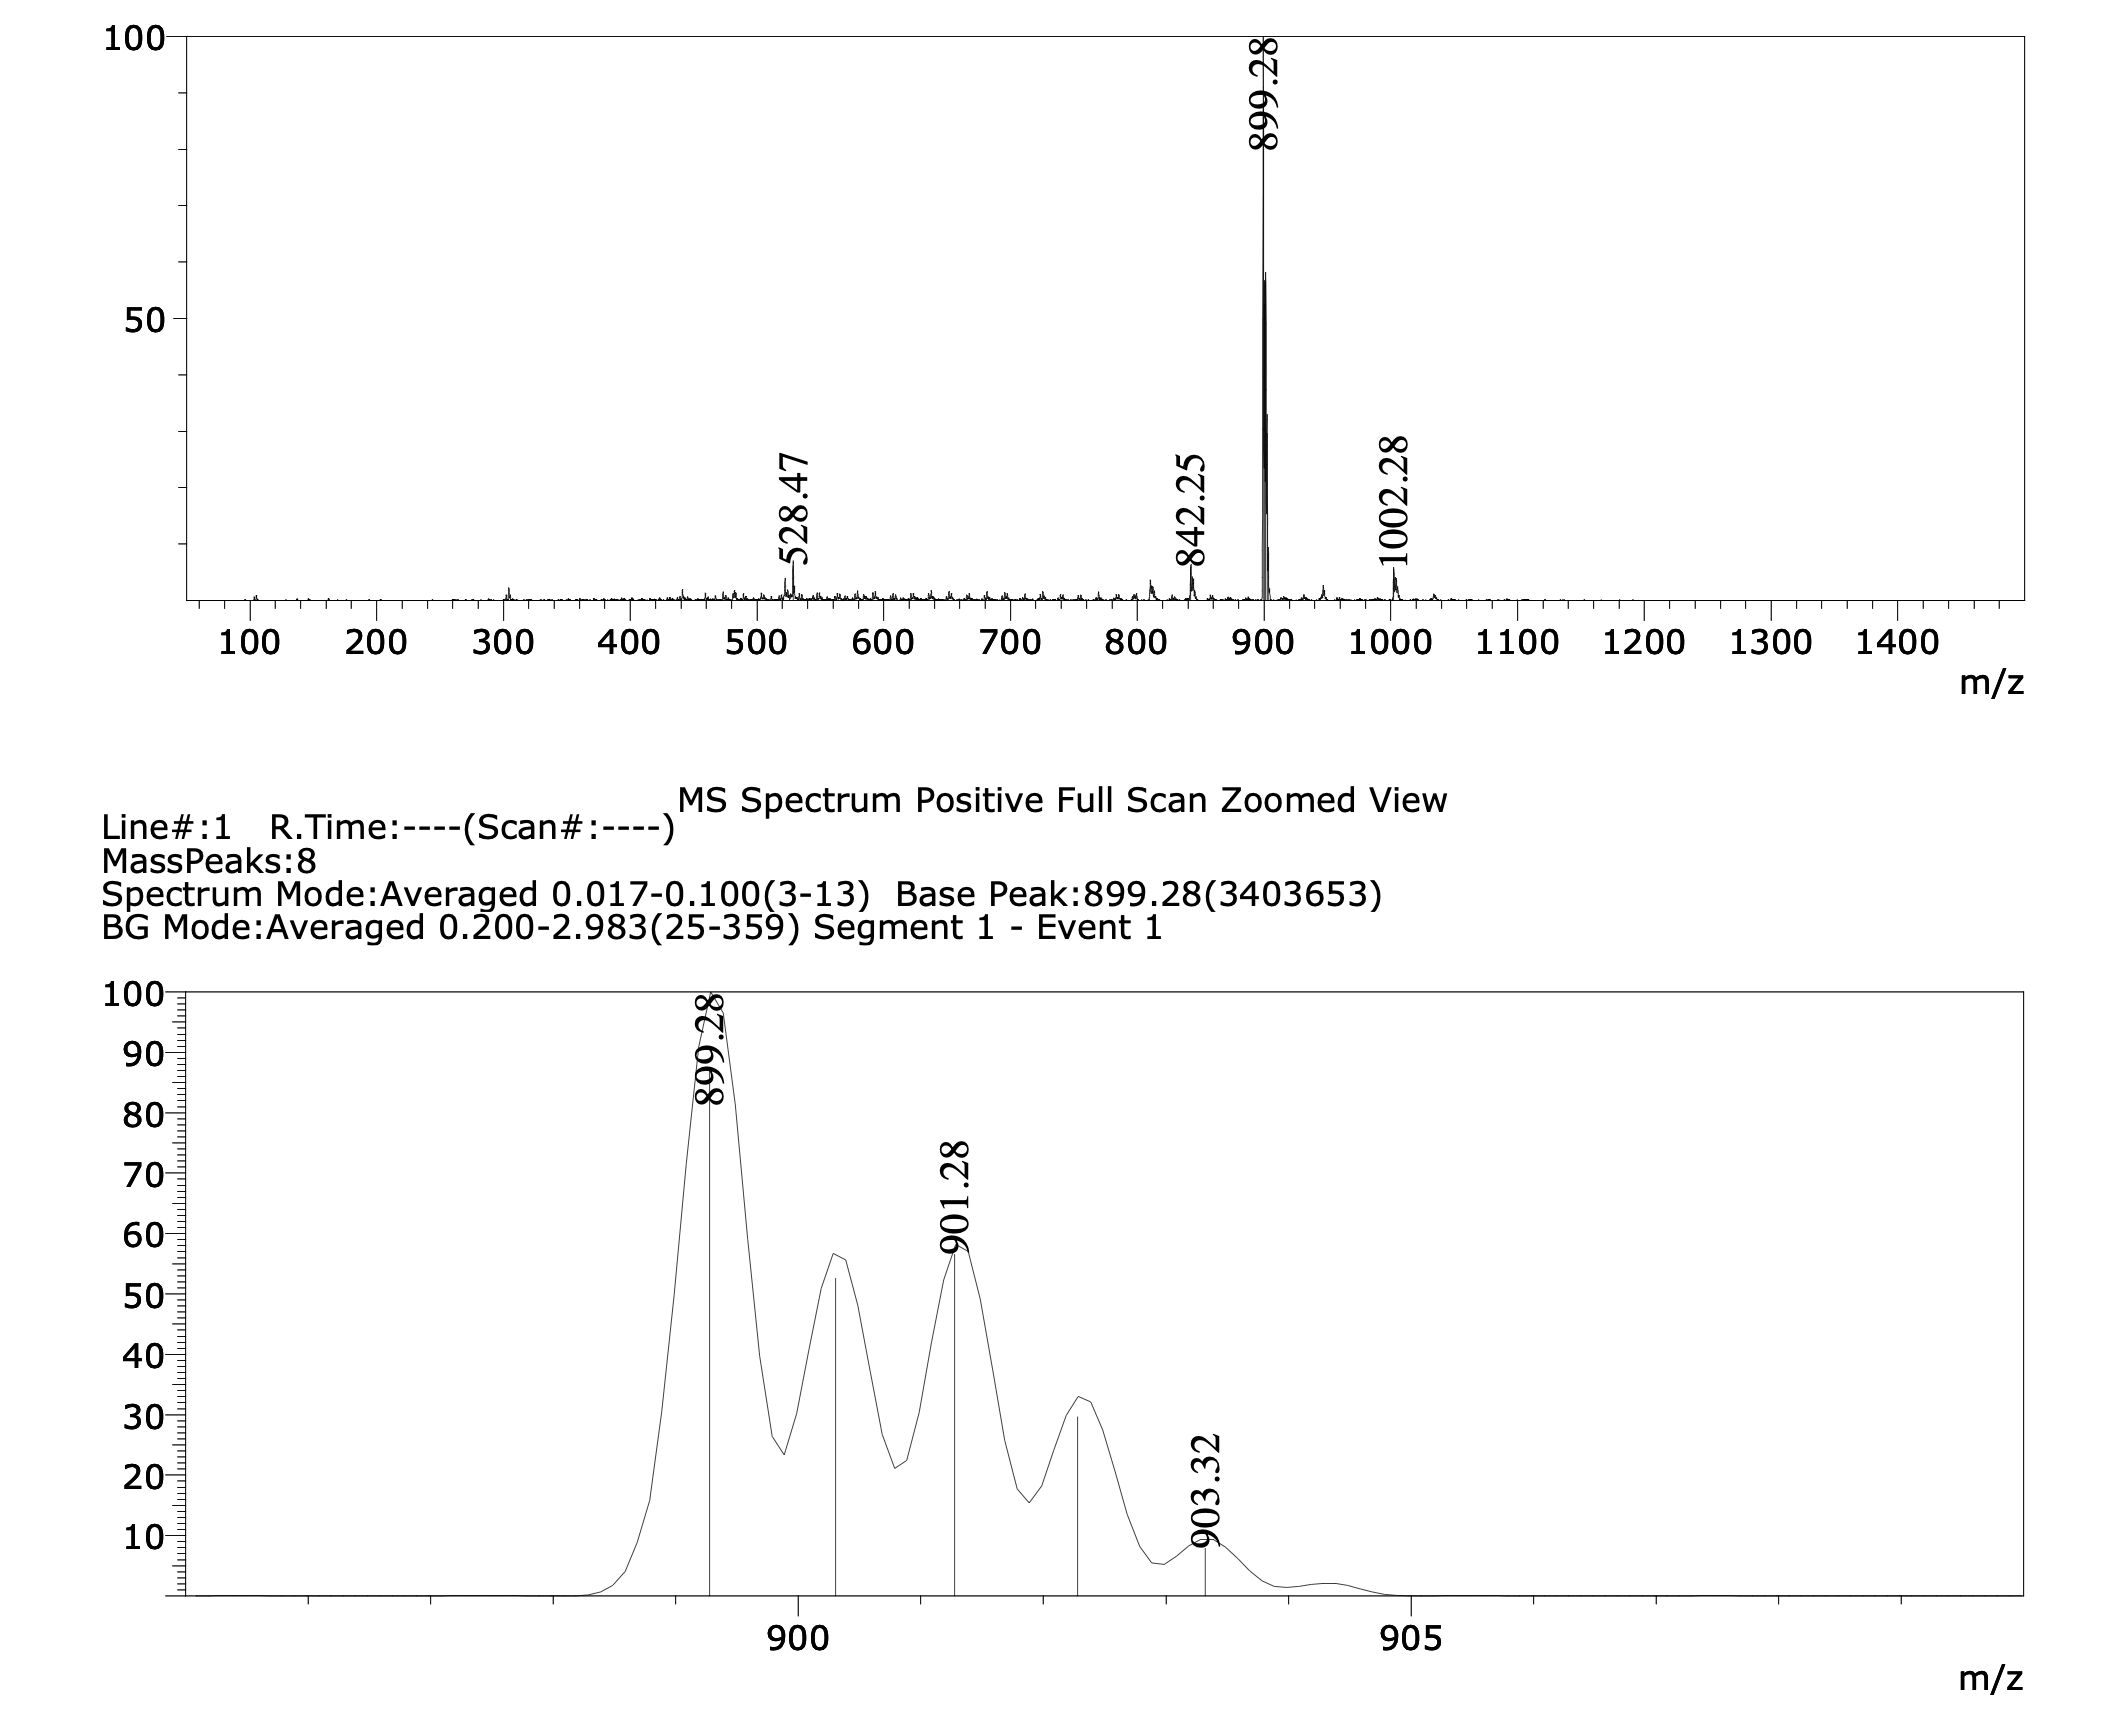


Figure S23. Electrospray mass spectrum of [Cu(**2**)2][PF6].

Figure S24. Electrospray mass spectrum of [Cu(**3**)2][PF6].


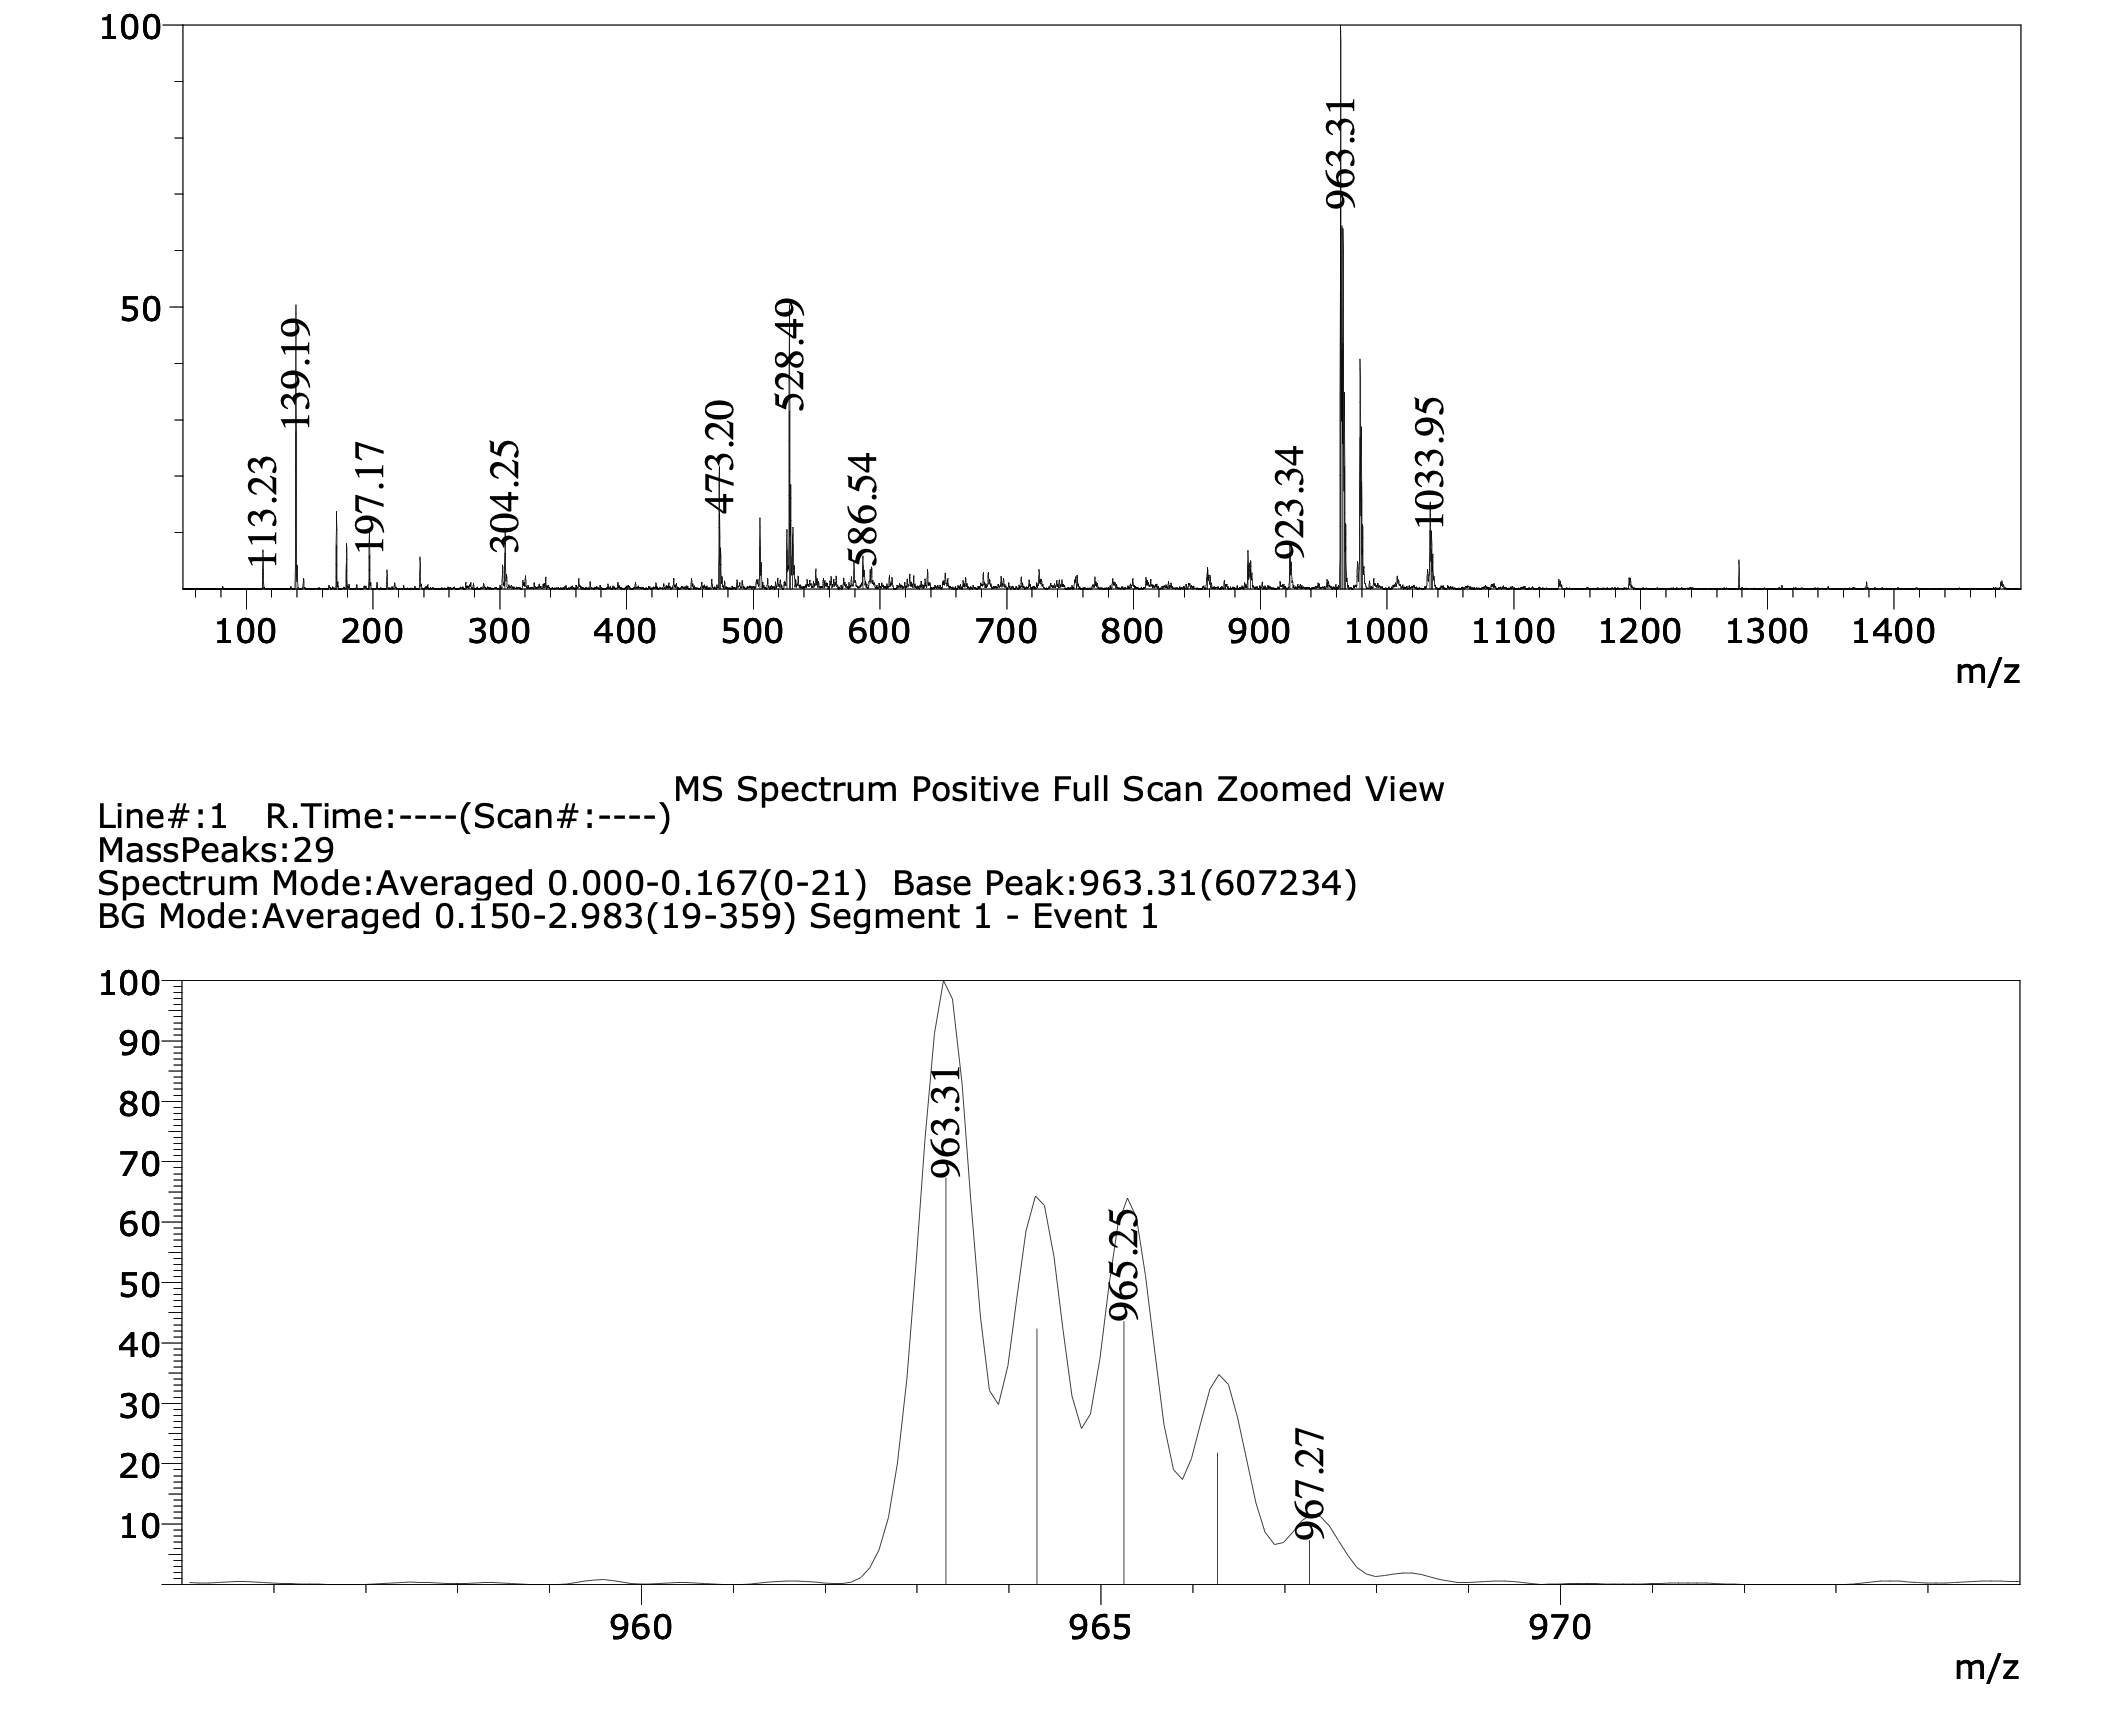


Figure S25. Electrospray mass spectrum of [Cu(**4**)2][PF6].


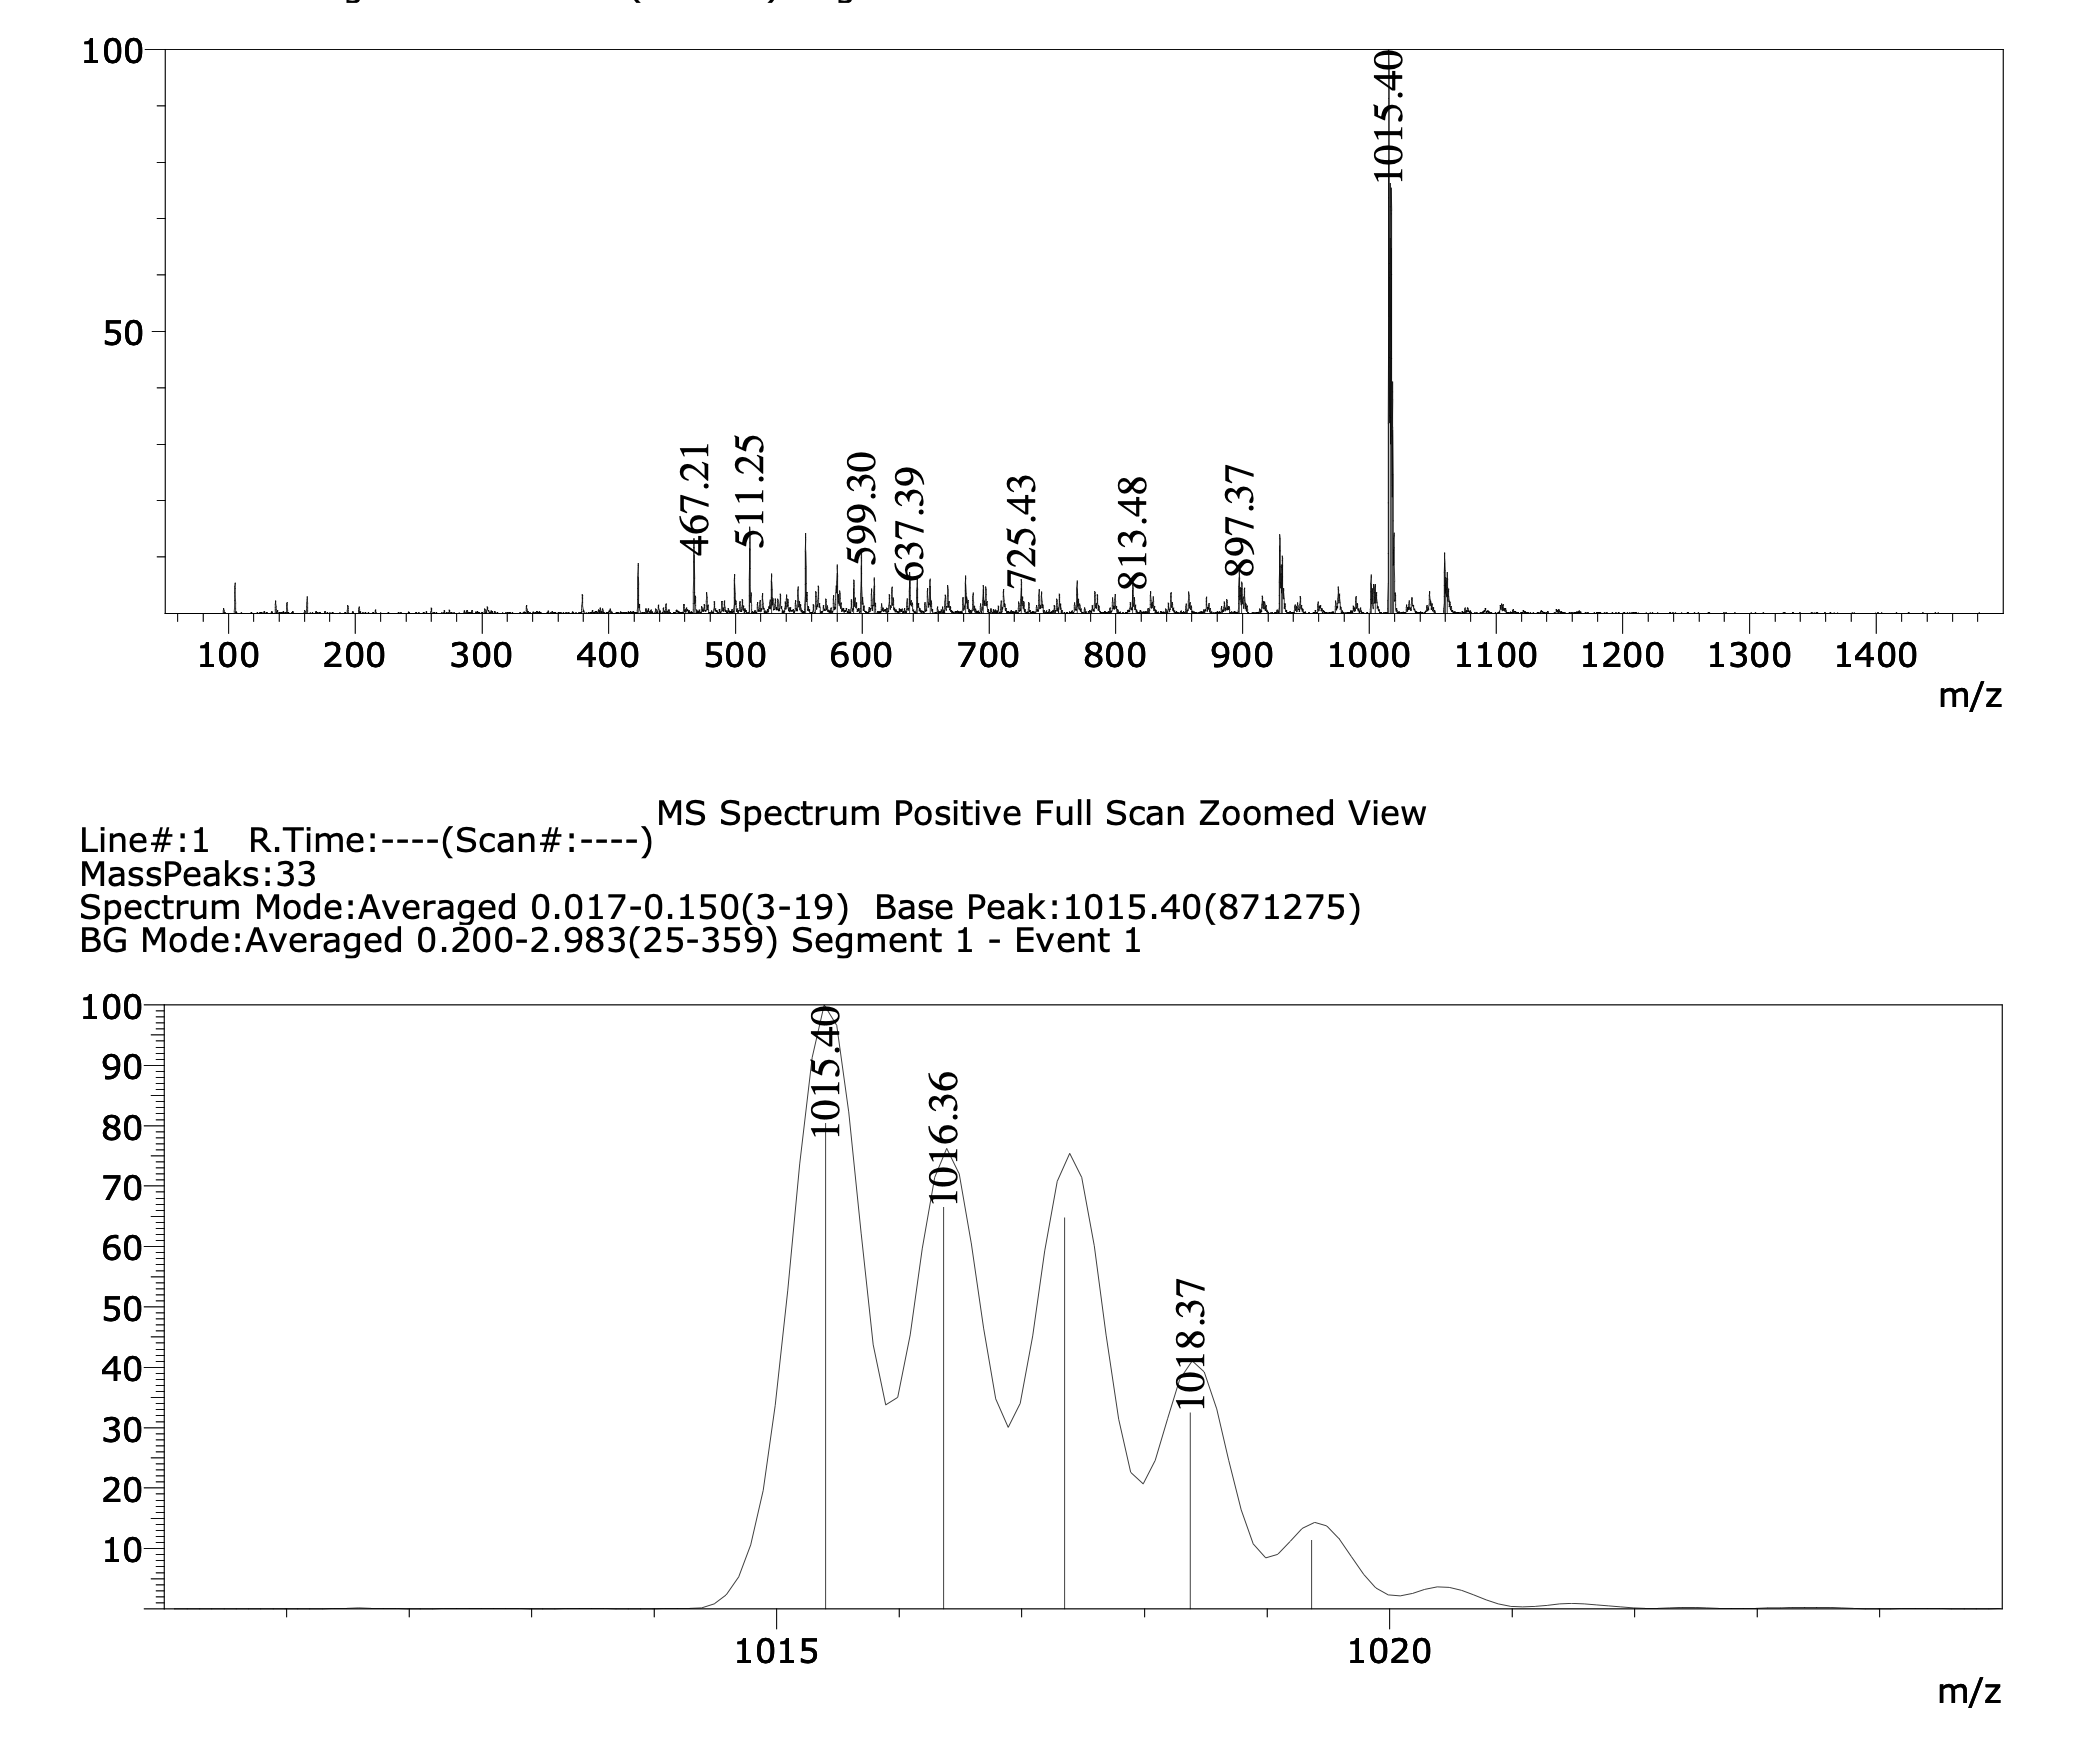


Figure S26. Electrospray mass spectrum of [Cu(**5**)2][PF6].


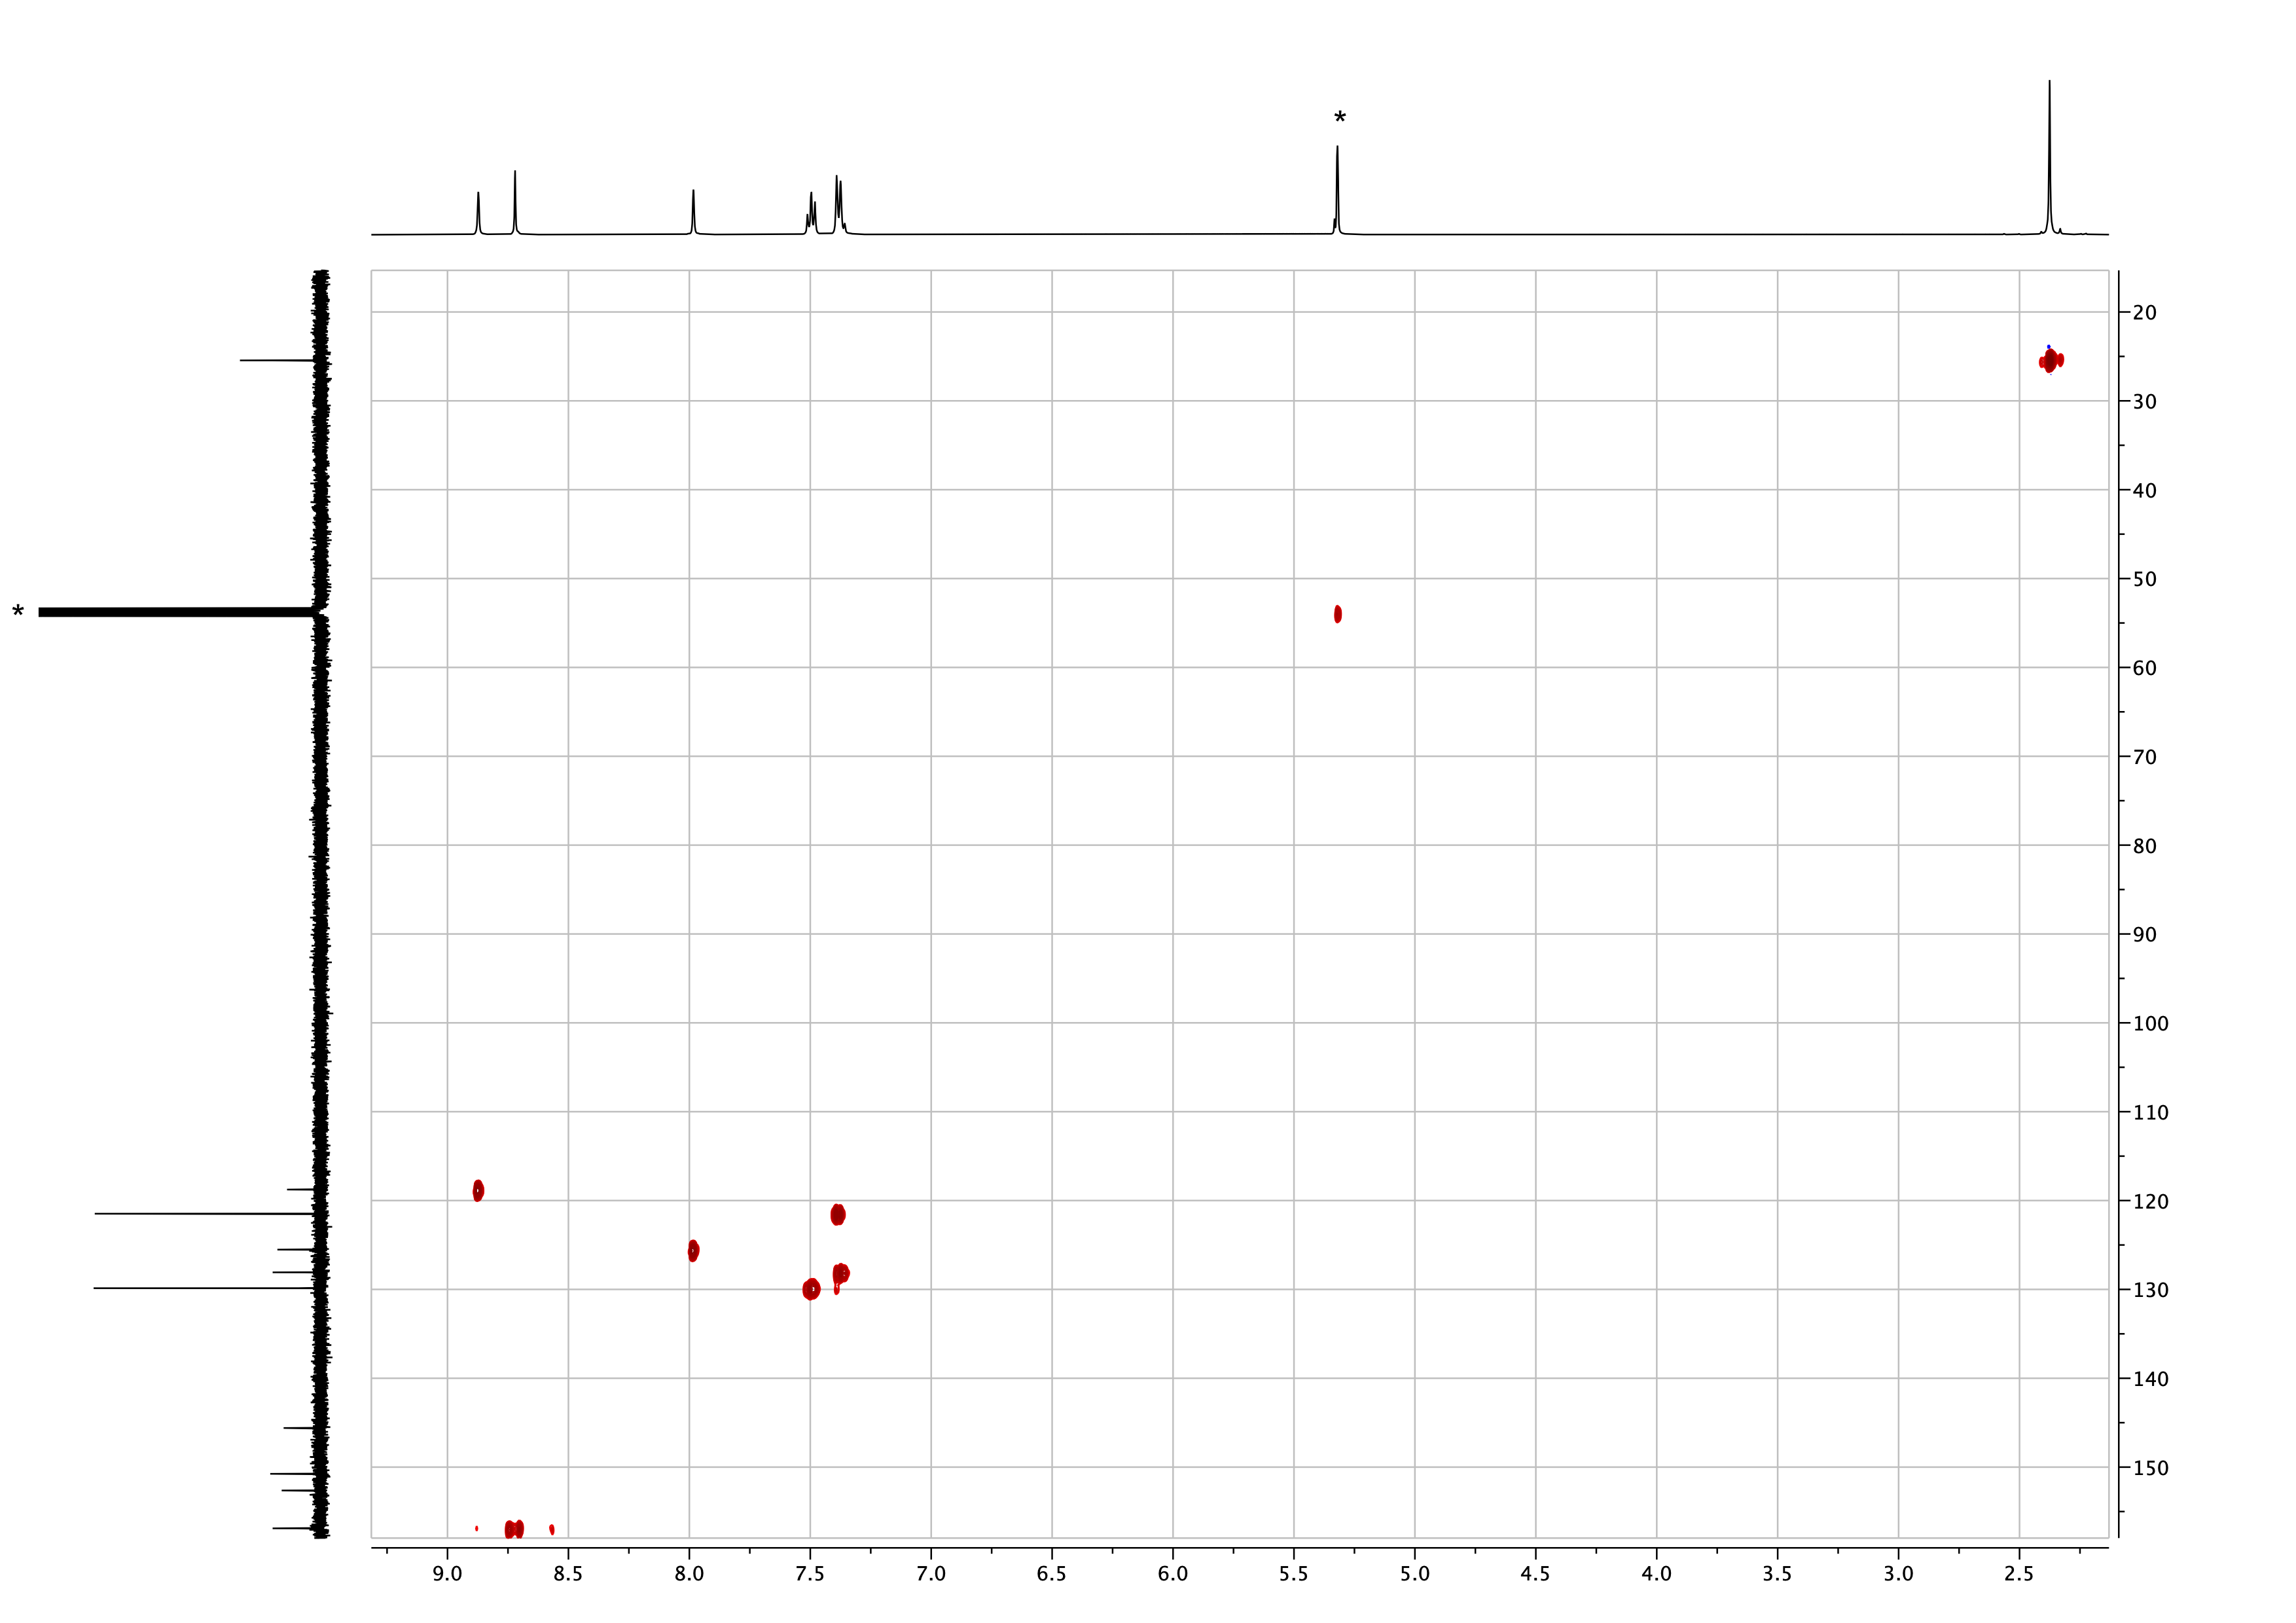


Figure S27. HMQC of complex [Cu(**1**)2][PF6](500 MHz 1H, 126 MHz 13C, CD2Cl2, 298 K). * = residual CHDCl2.


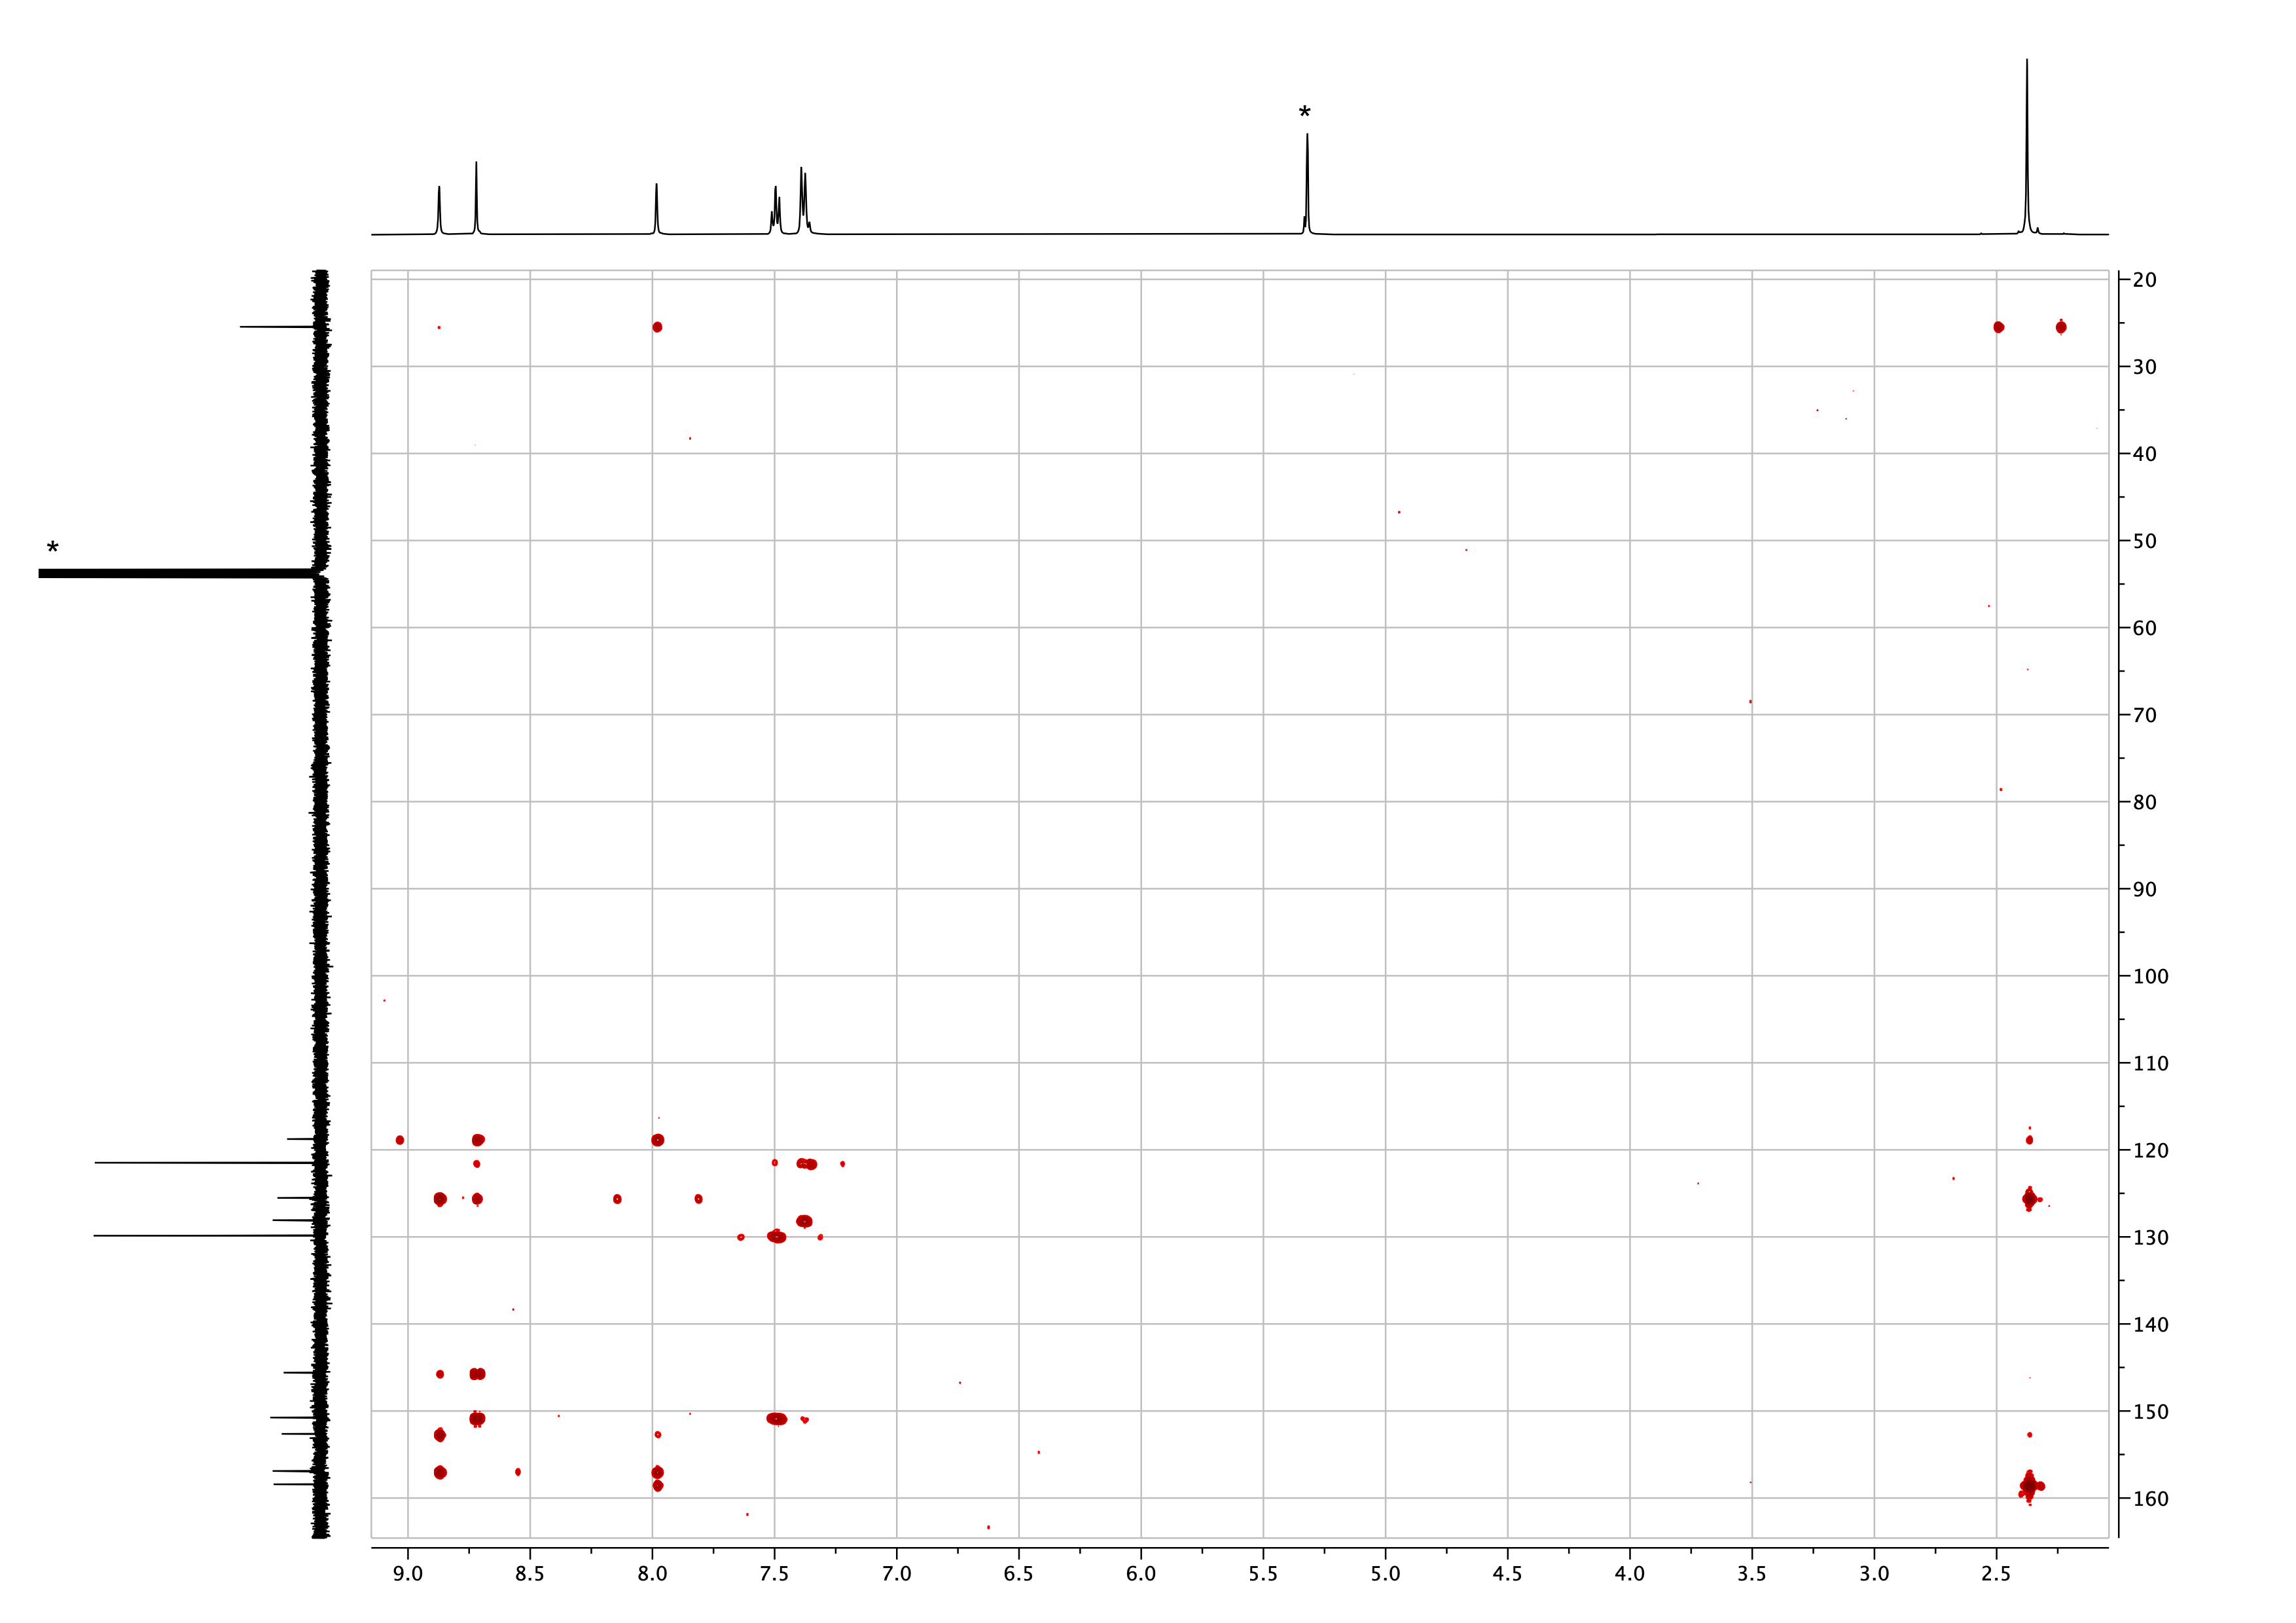


Figure S28. HMBC of complex [Cu(**1**)2][PF6](500 MHz 1H, 126 MHz 13C, CD2Cl2, 298 K). * = residual CHDCl2.


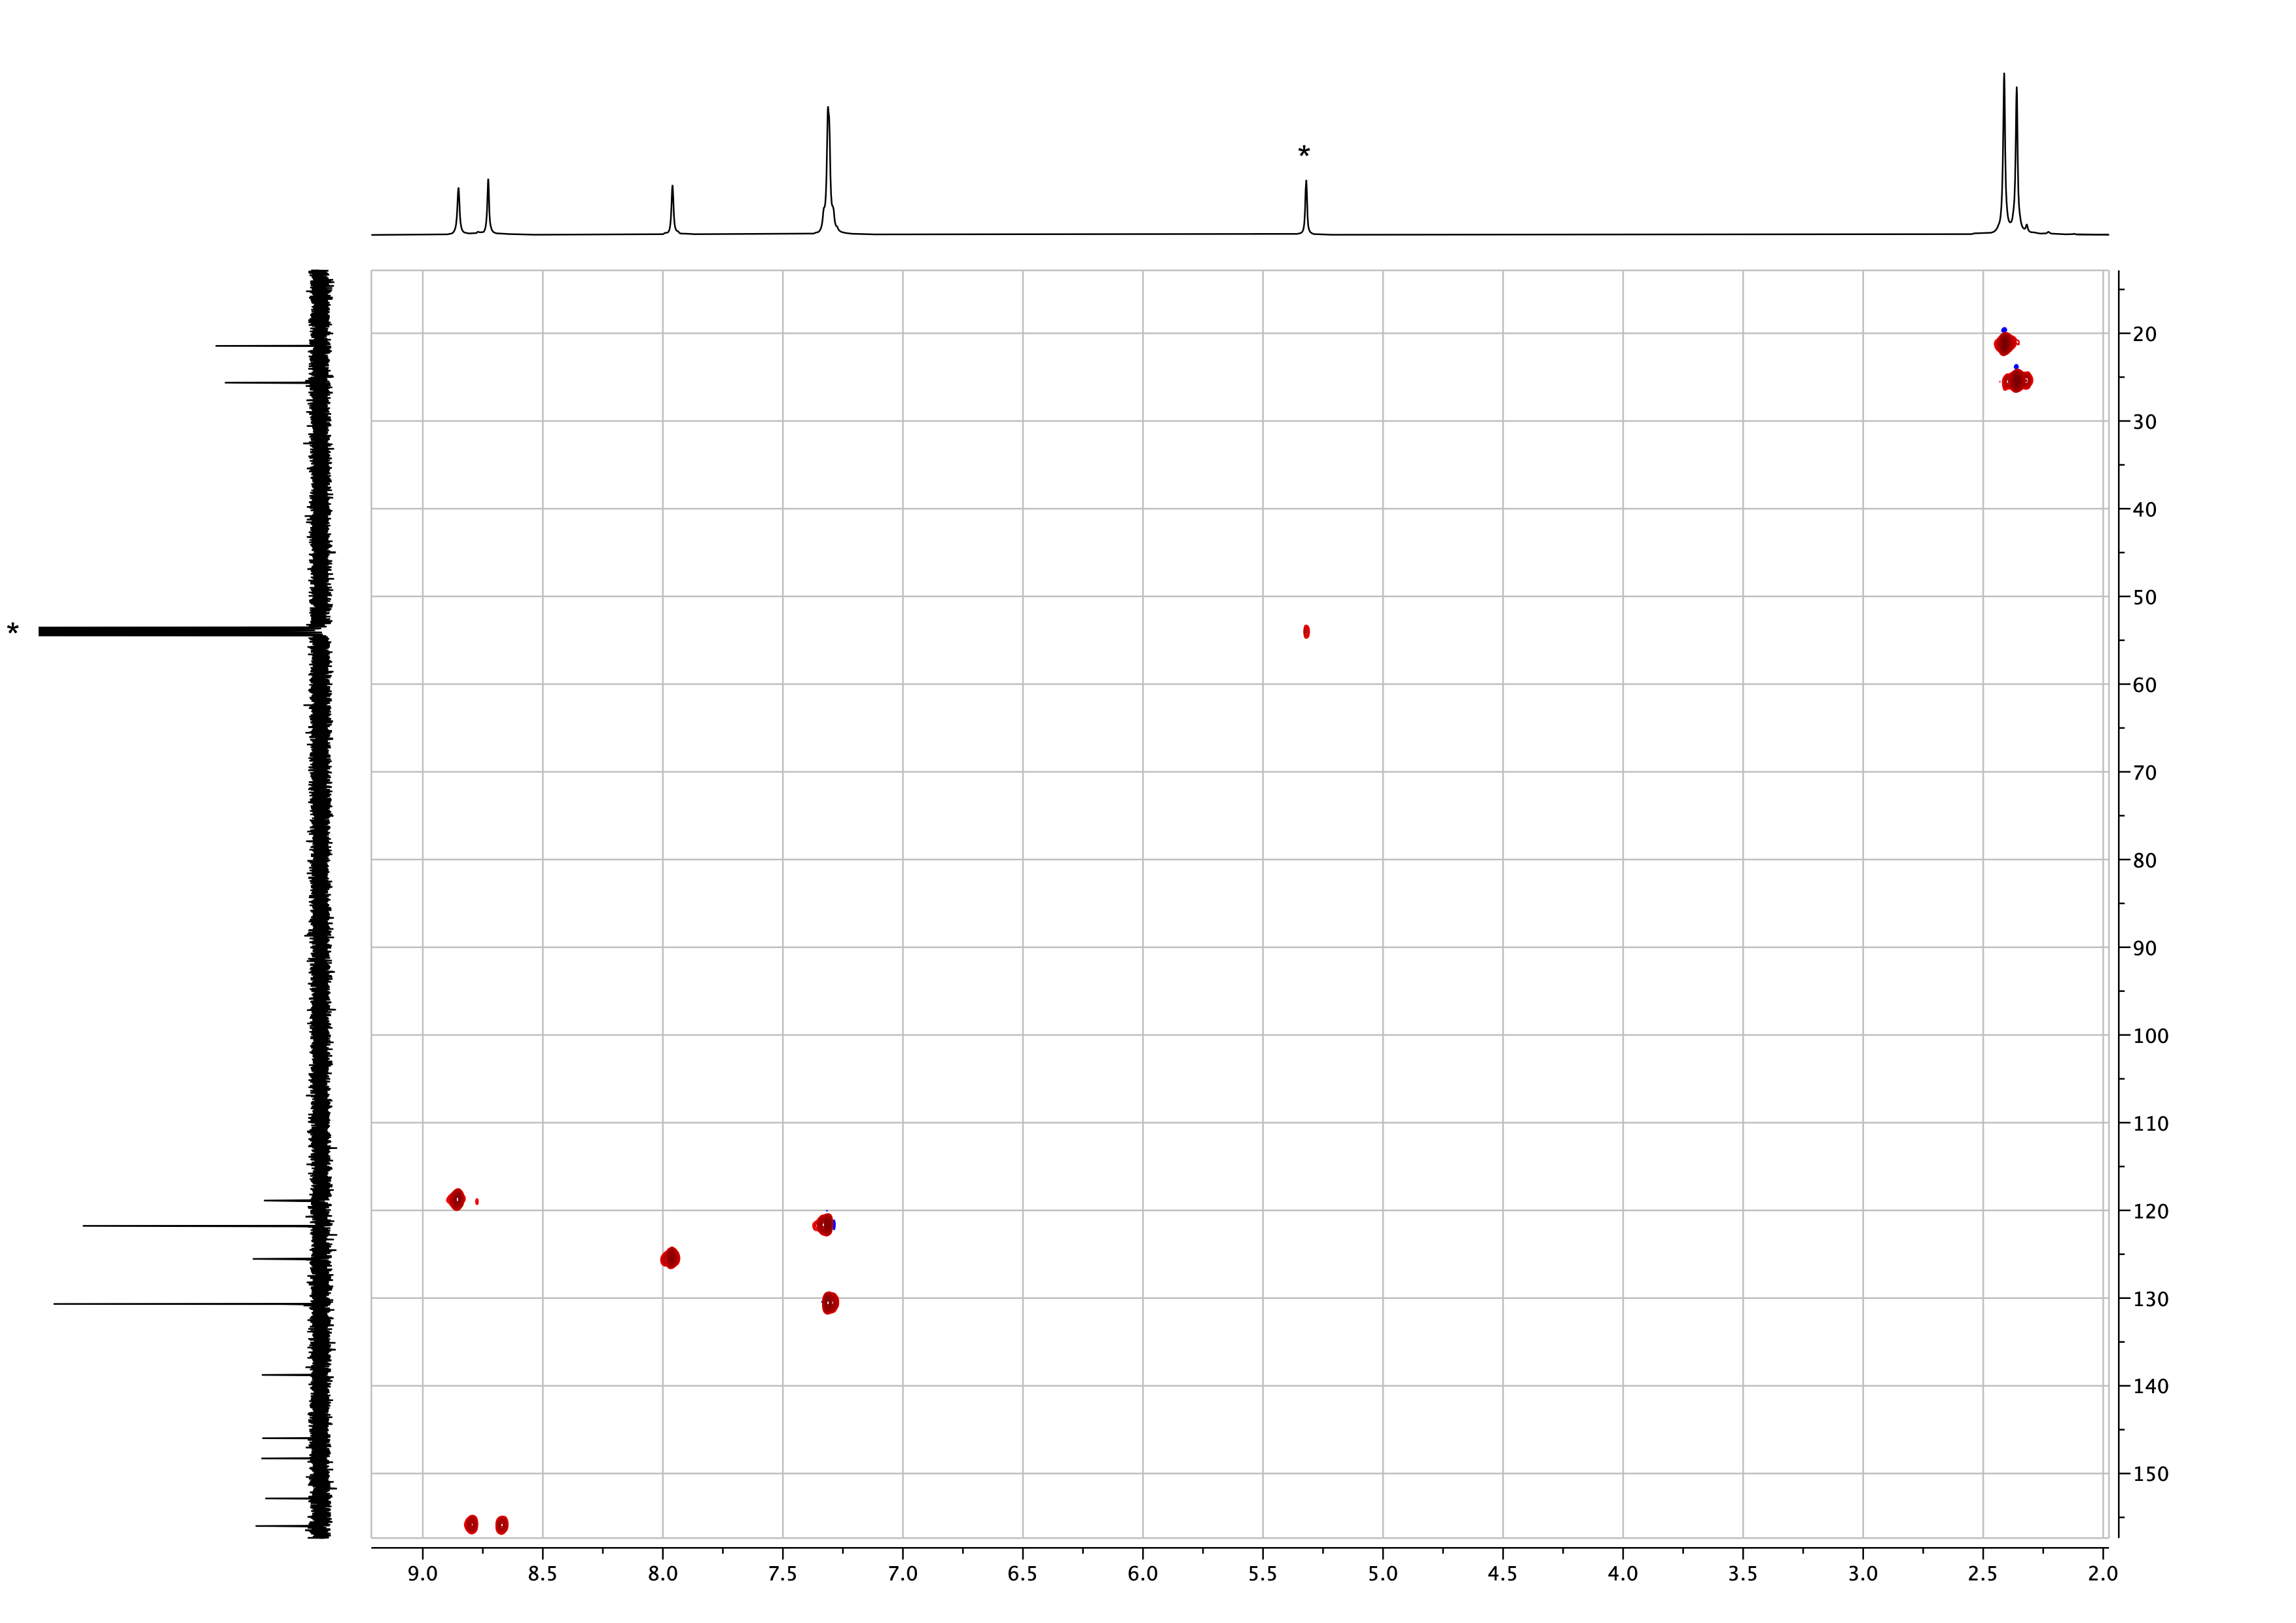


Figure S29. HMQC of complex [Cu(**2**)2][PF6](500 MHz 1H, 126 MHz 13C, CD2Cl2, 298 K). * = residual CHDCl2.


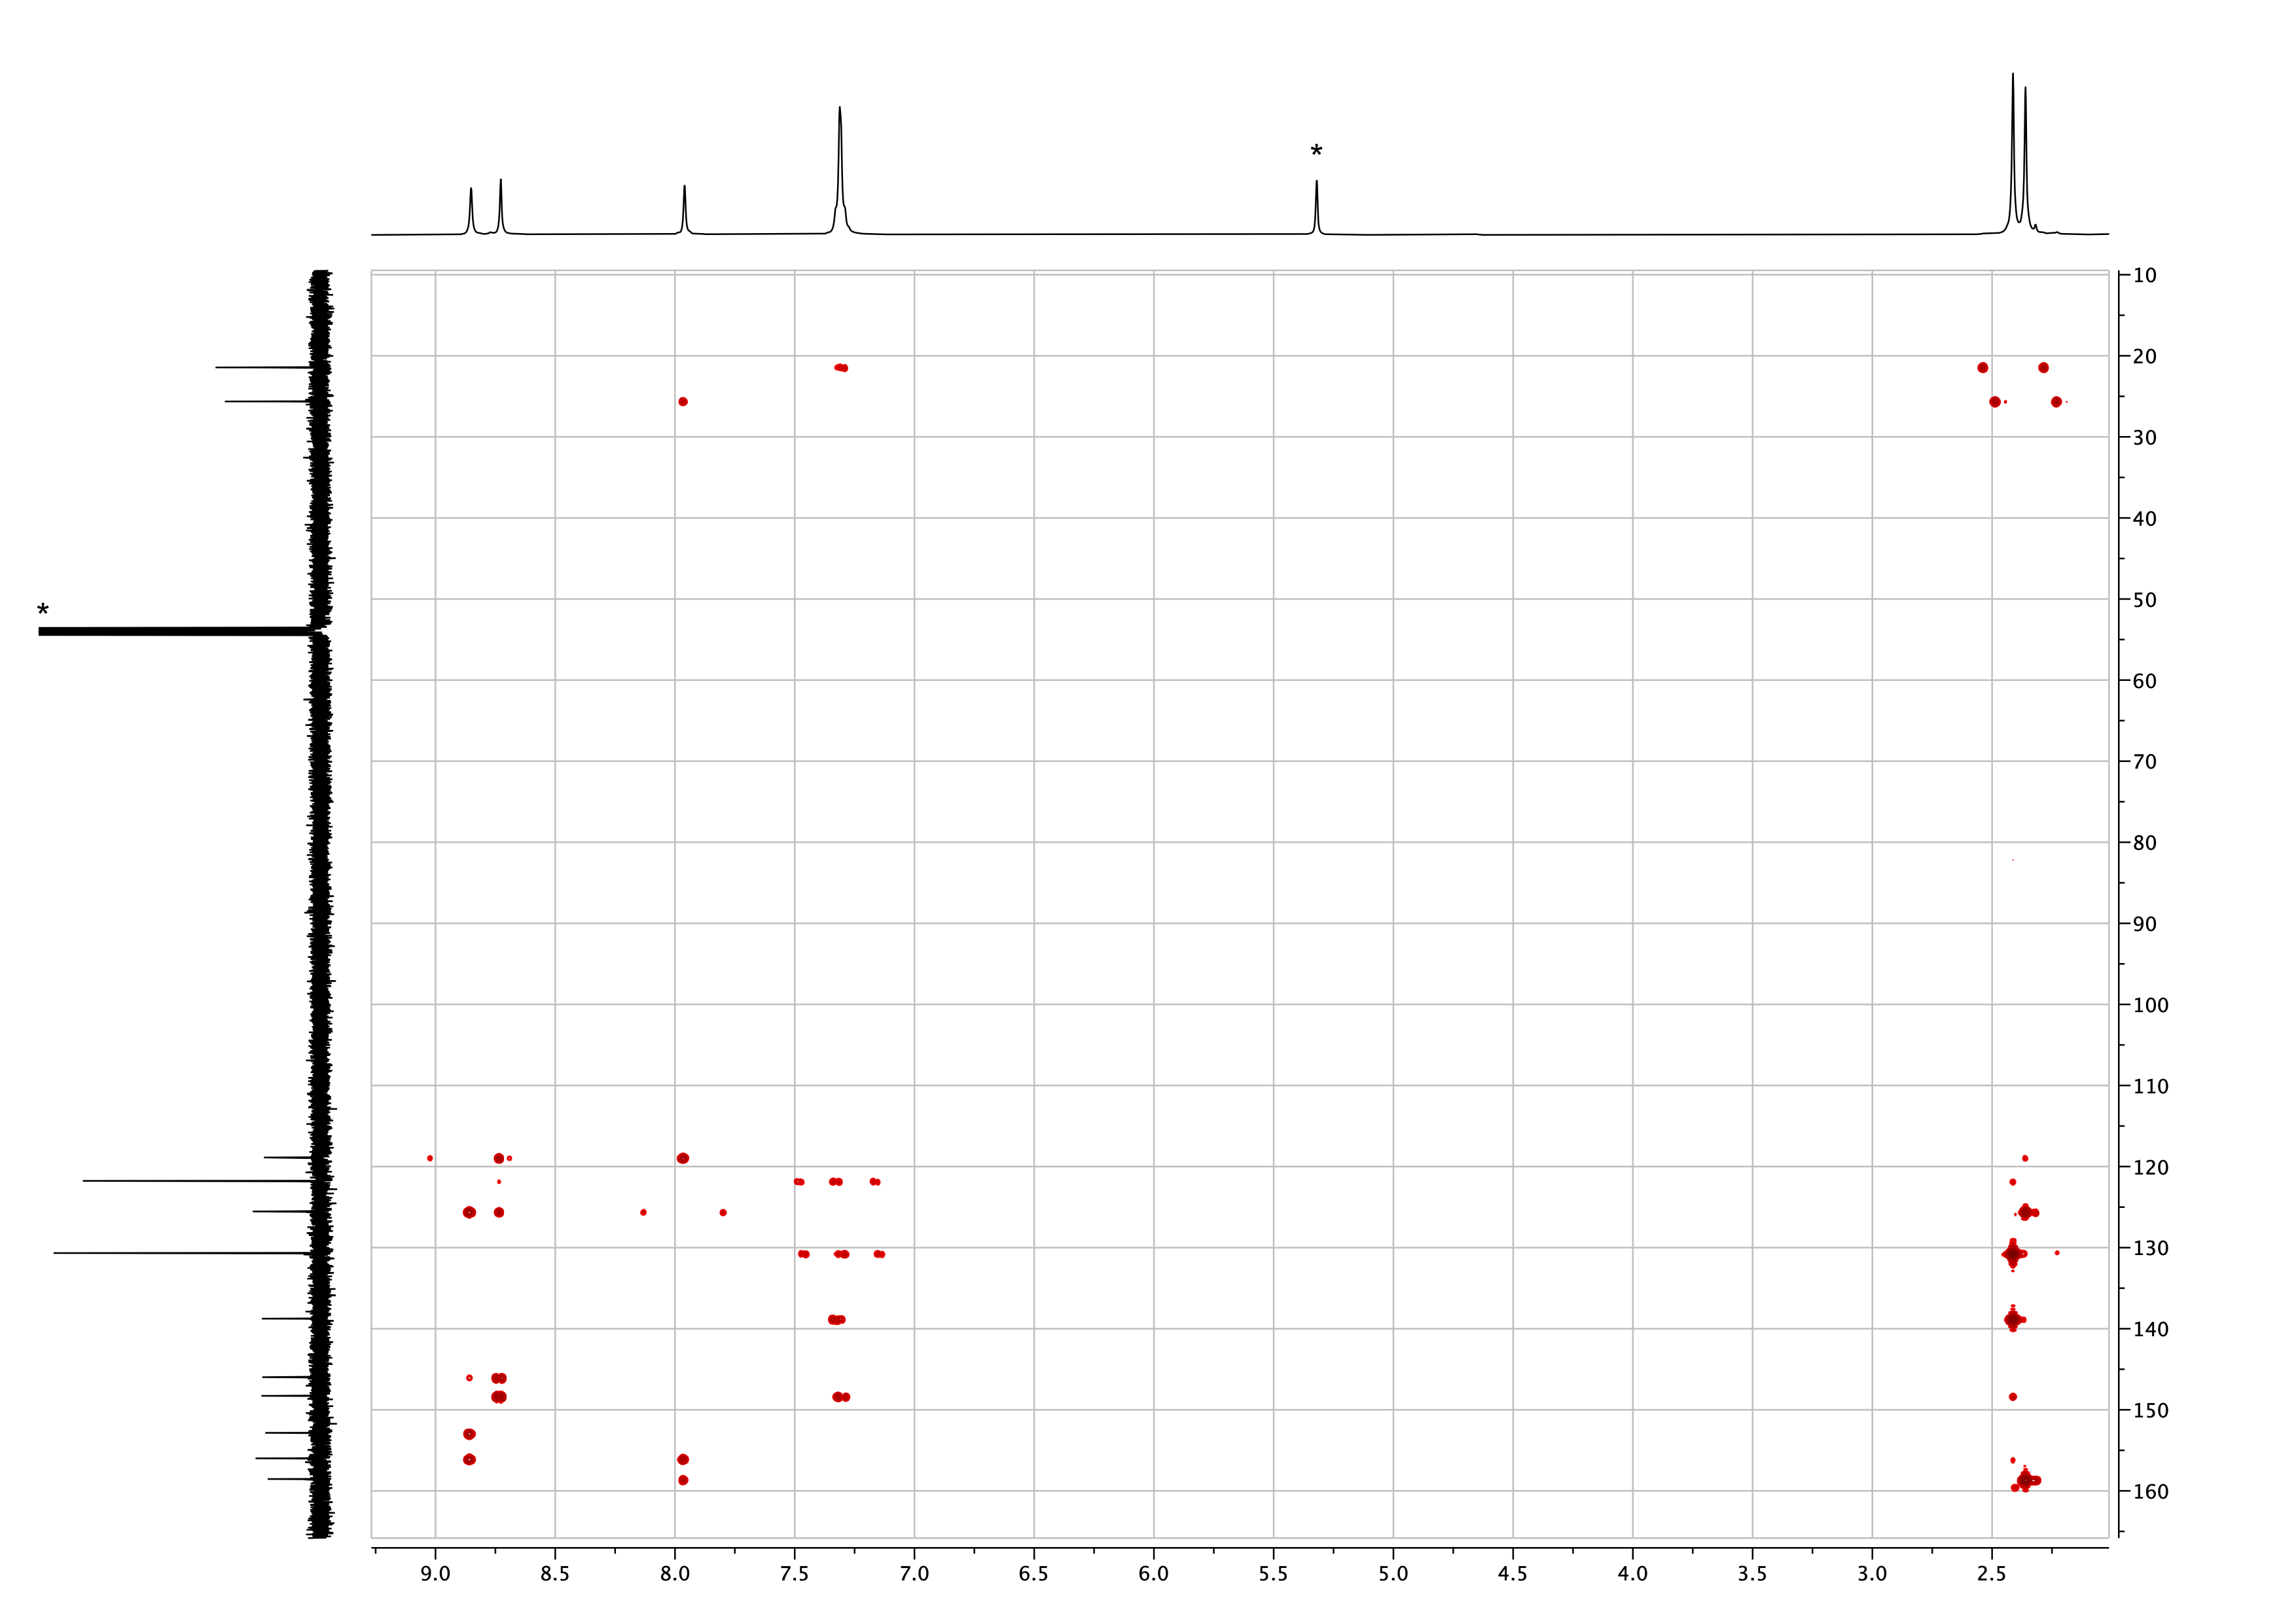
Figure S30. HMBC of complex [Cu(**2**)2][PF6](500 MHz 1H, 126 MHz 13C, CD2Cl2, 298 K). * = residual CHDCl2.


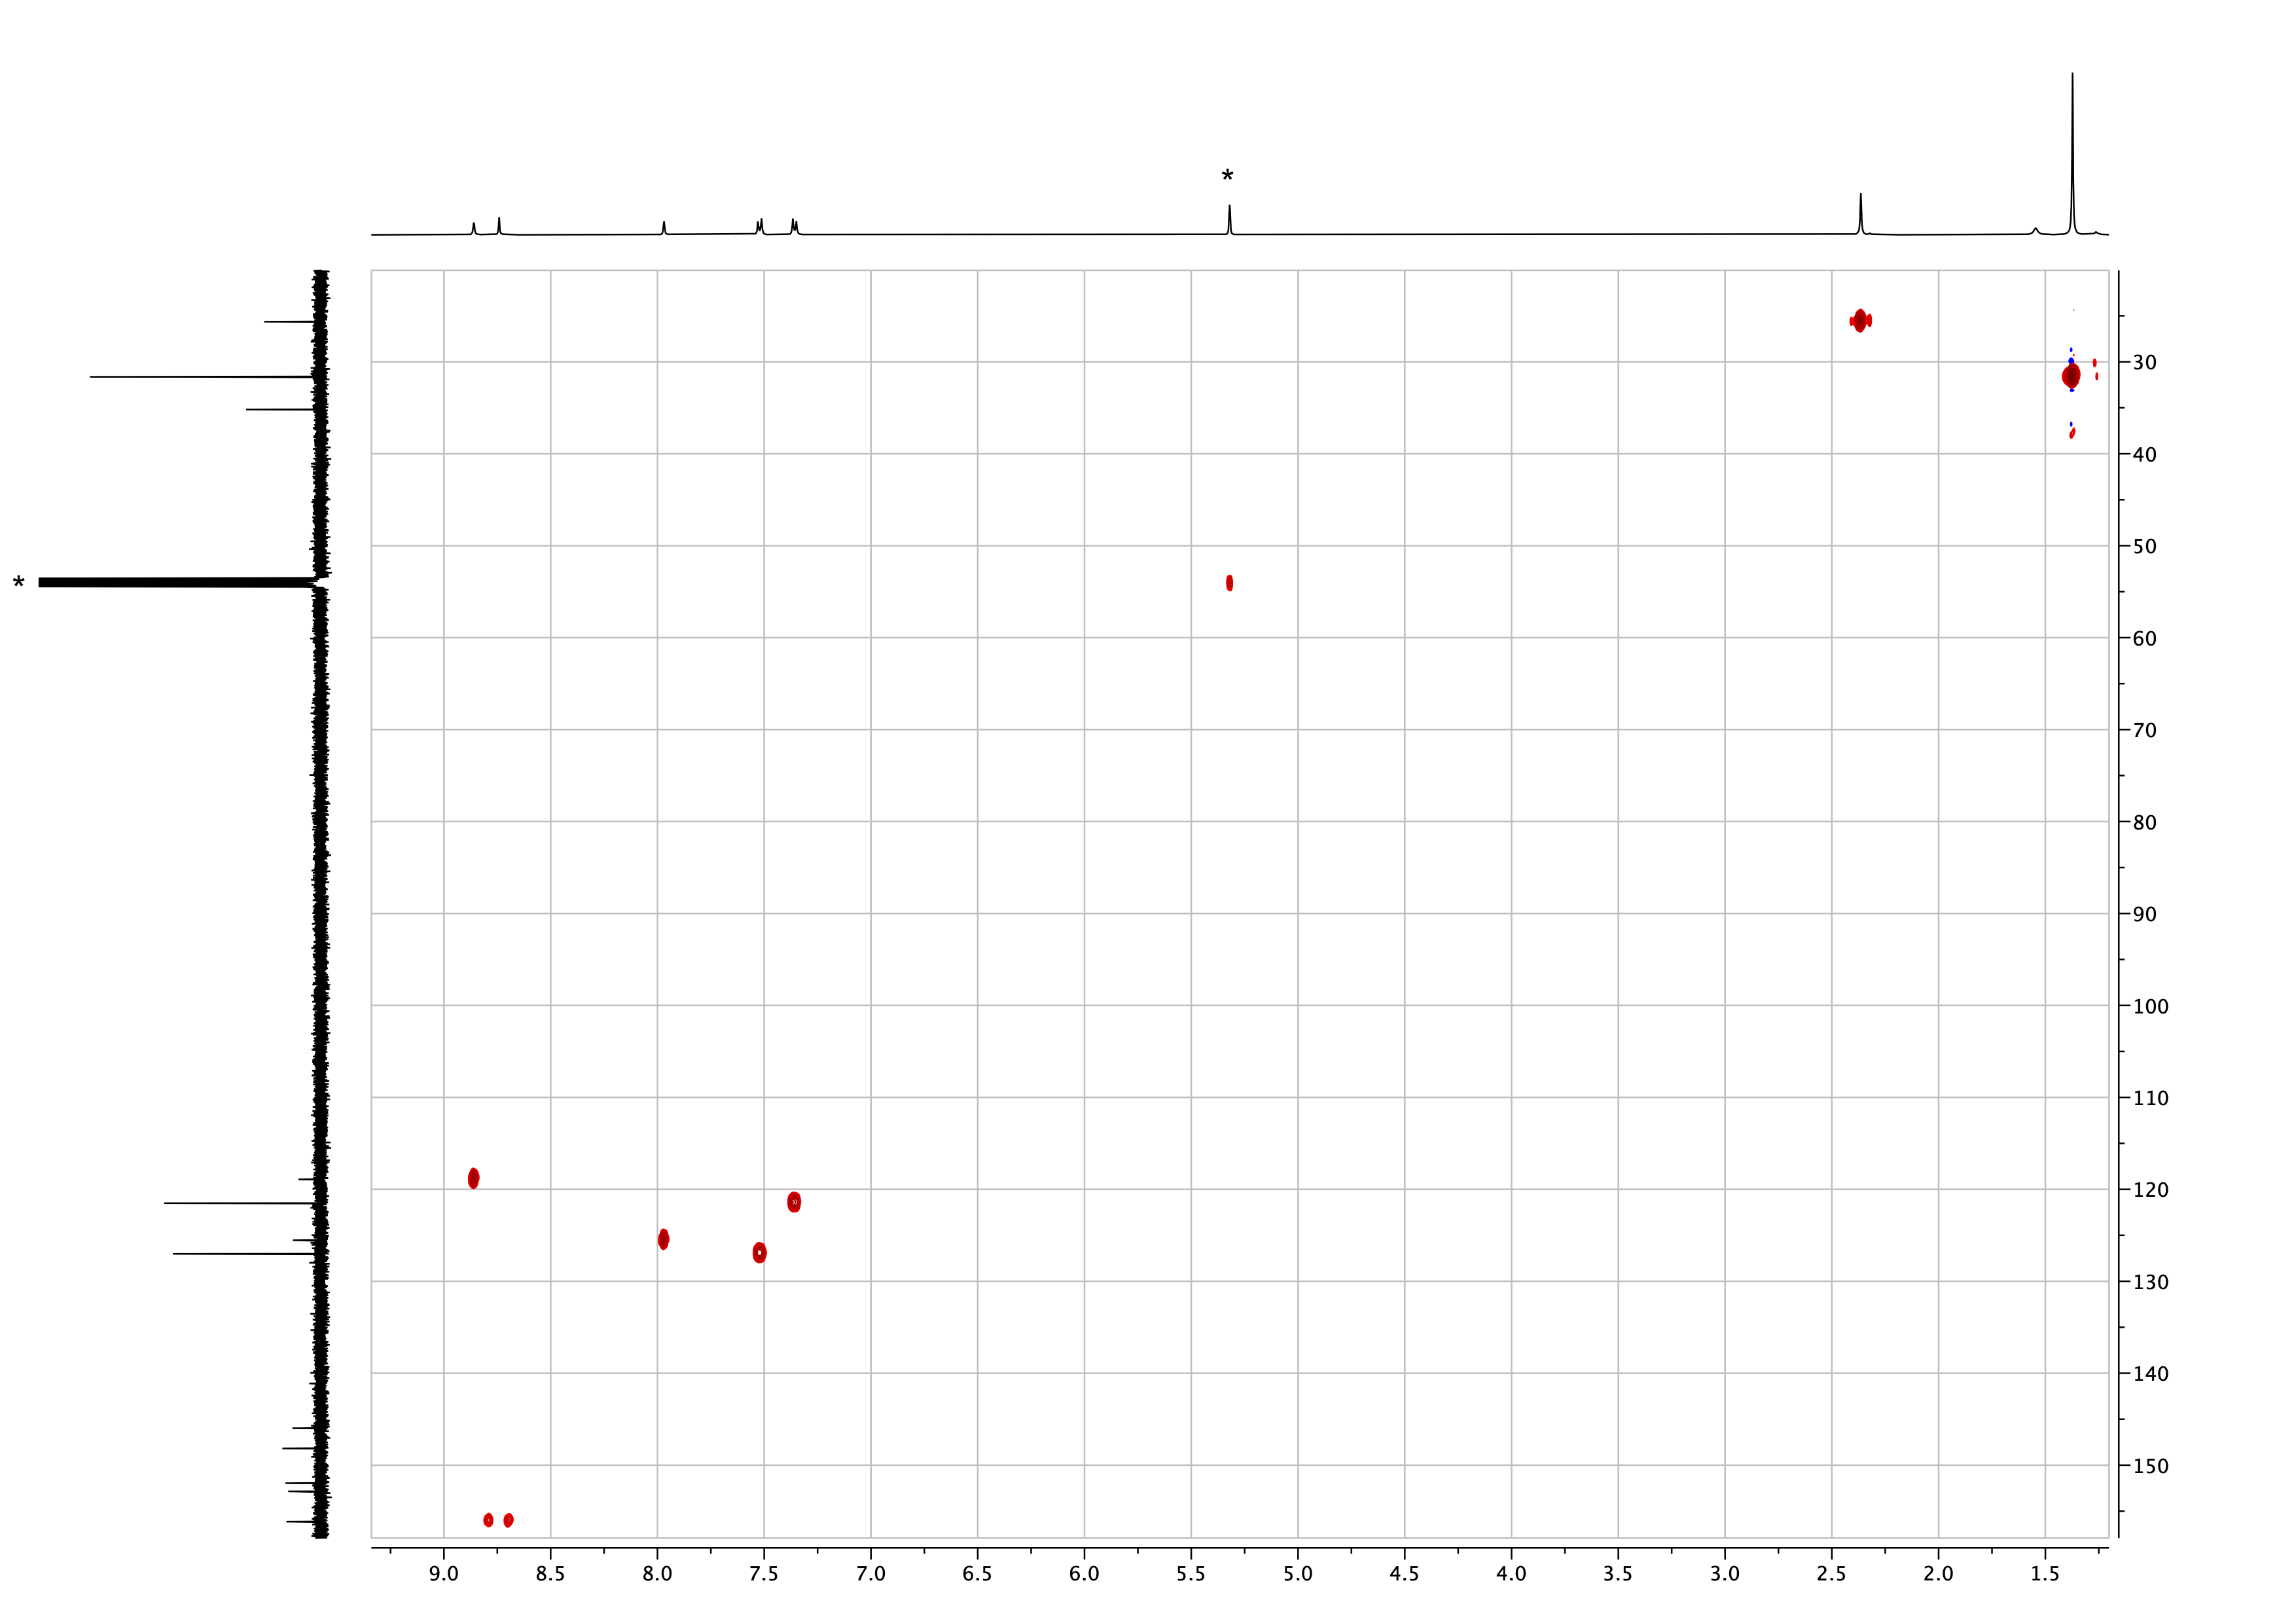


Figure S31. HMQC of complex [Cu(**3**)2][PF6](500 MHz 1H, 126 MHz 13C, CD2Cl2, 298 K). * = residual CHDCl2.


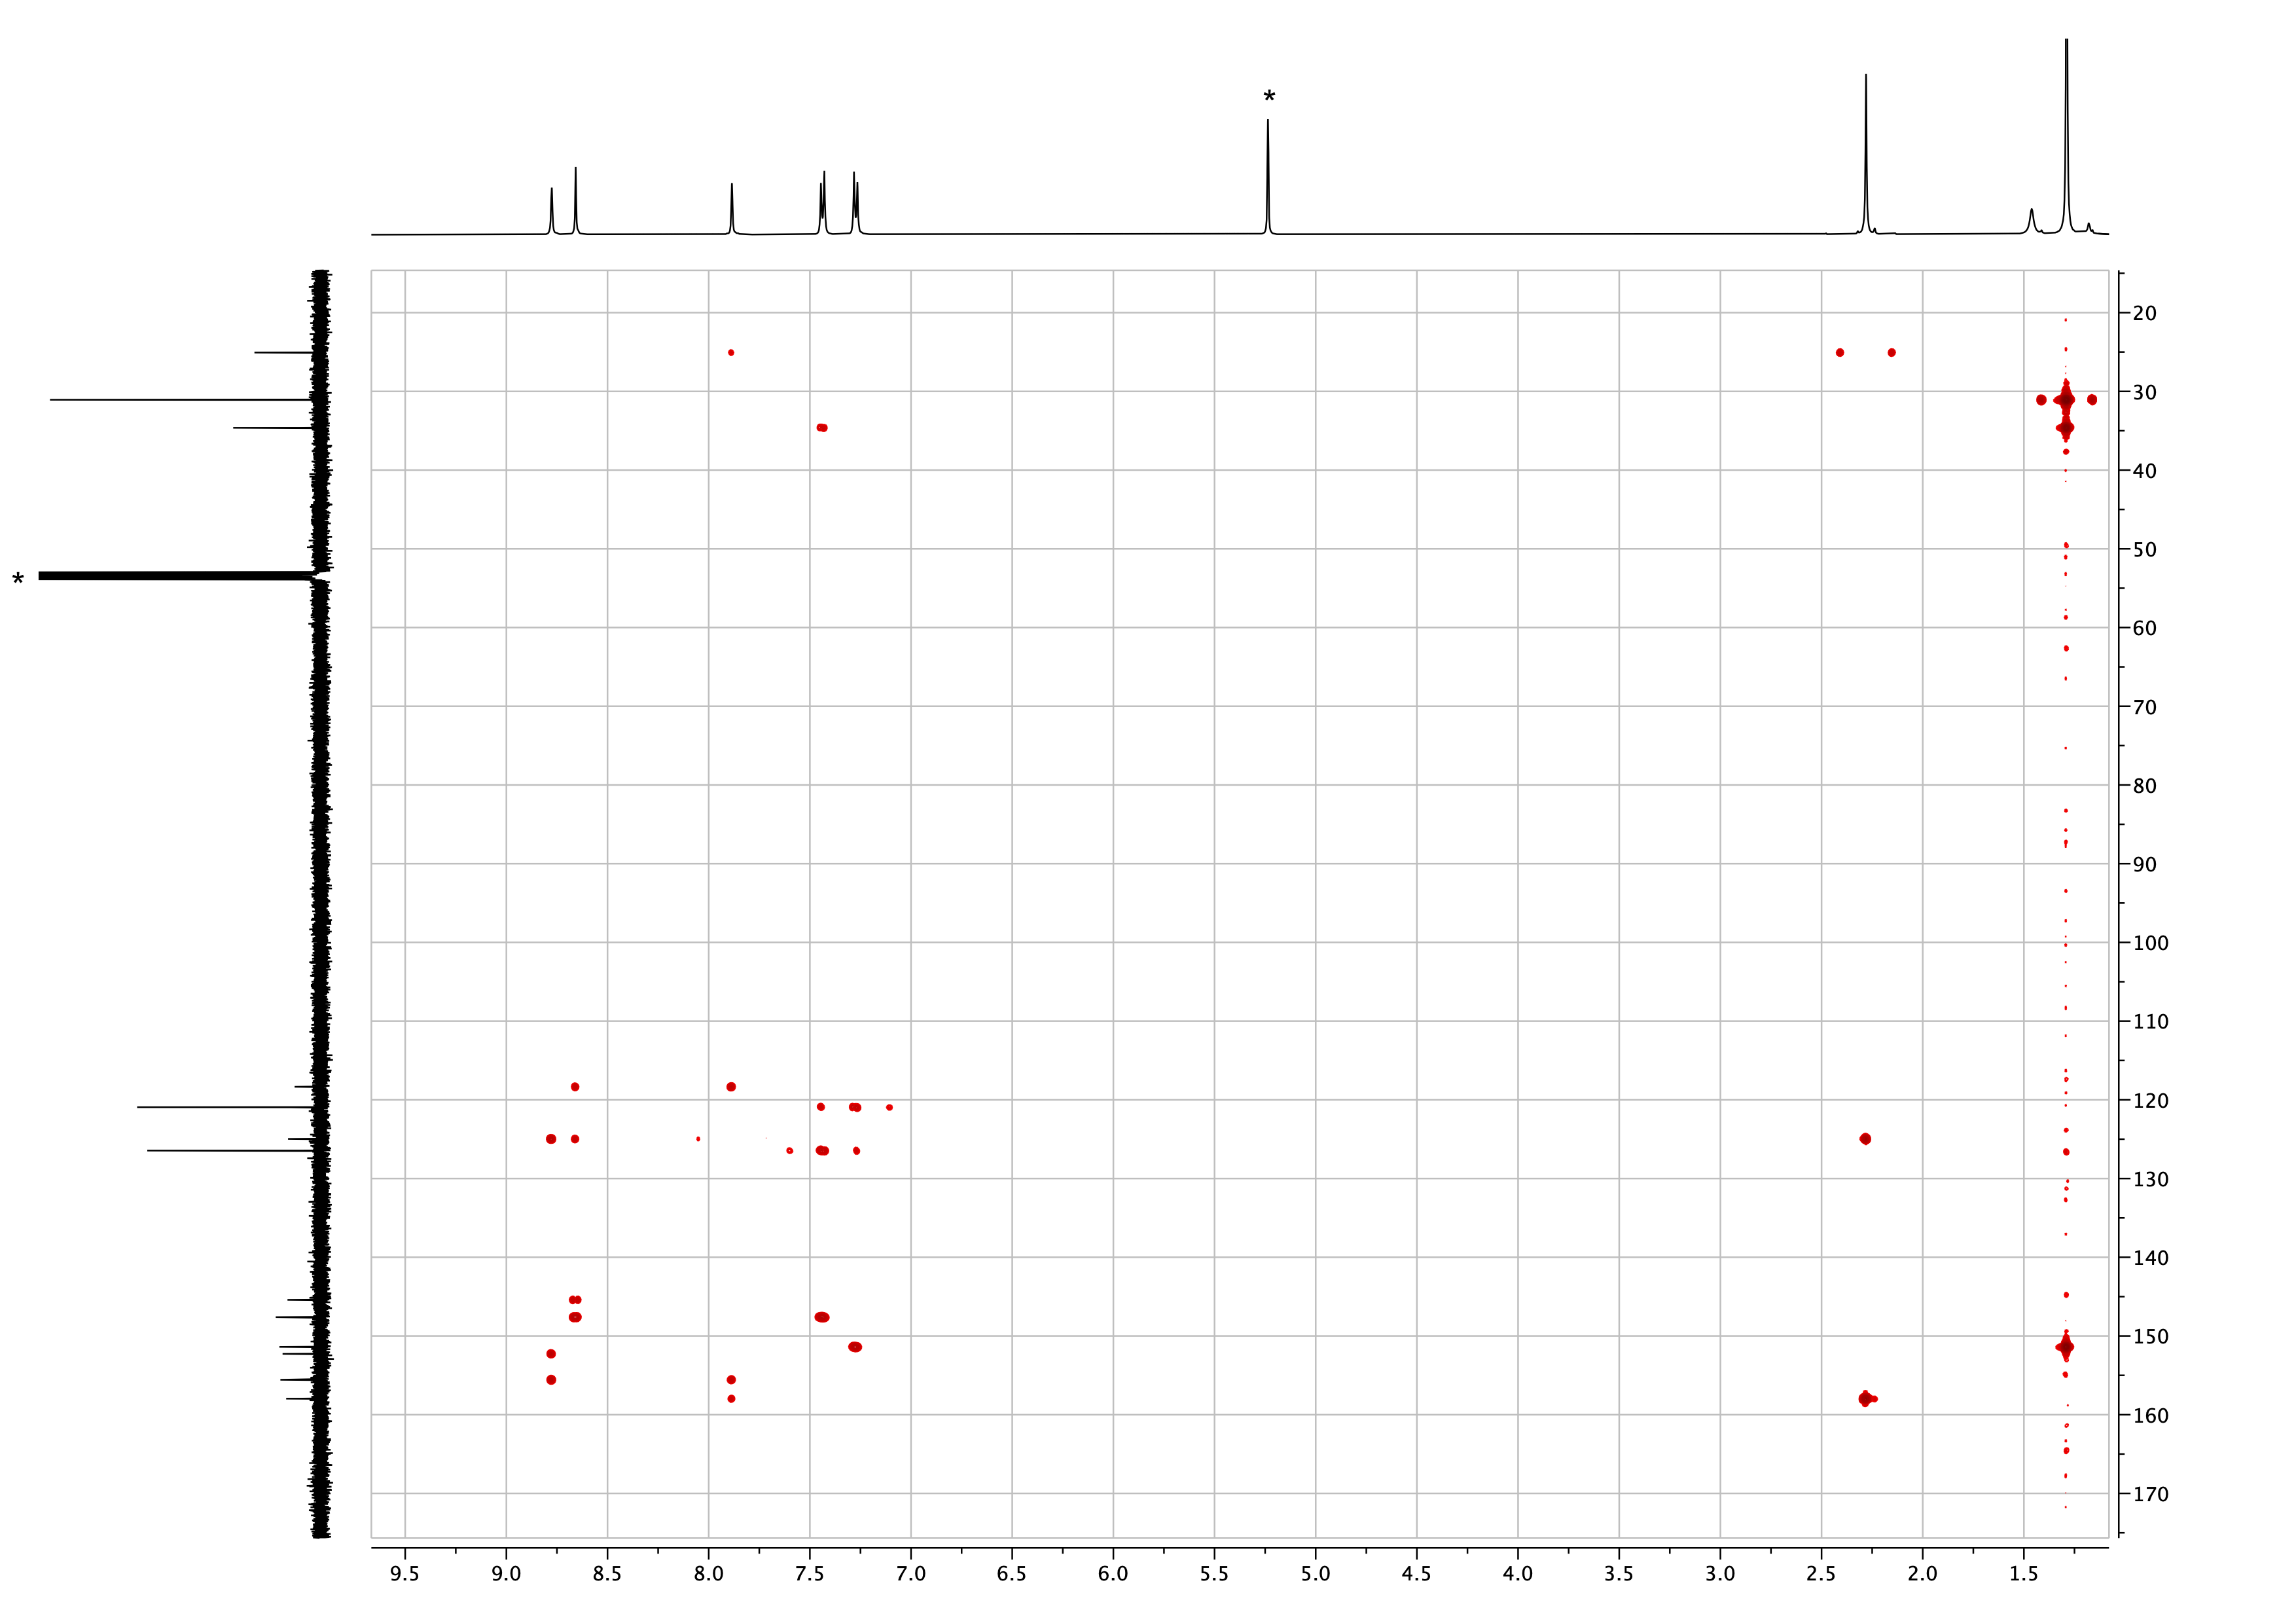


Figure S32. HMBC of complex [Cu(**3**)2][PF6](500 MHz 1H, 126 MHz 13C, CD2Cl2, 298 K). * = residual CHDCl2.


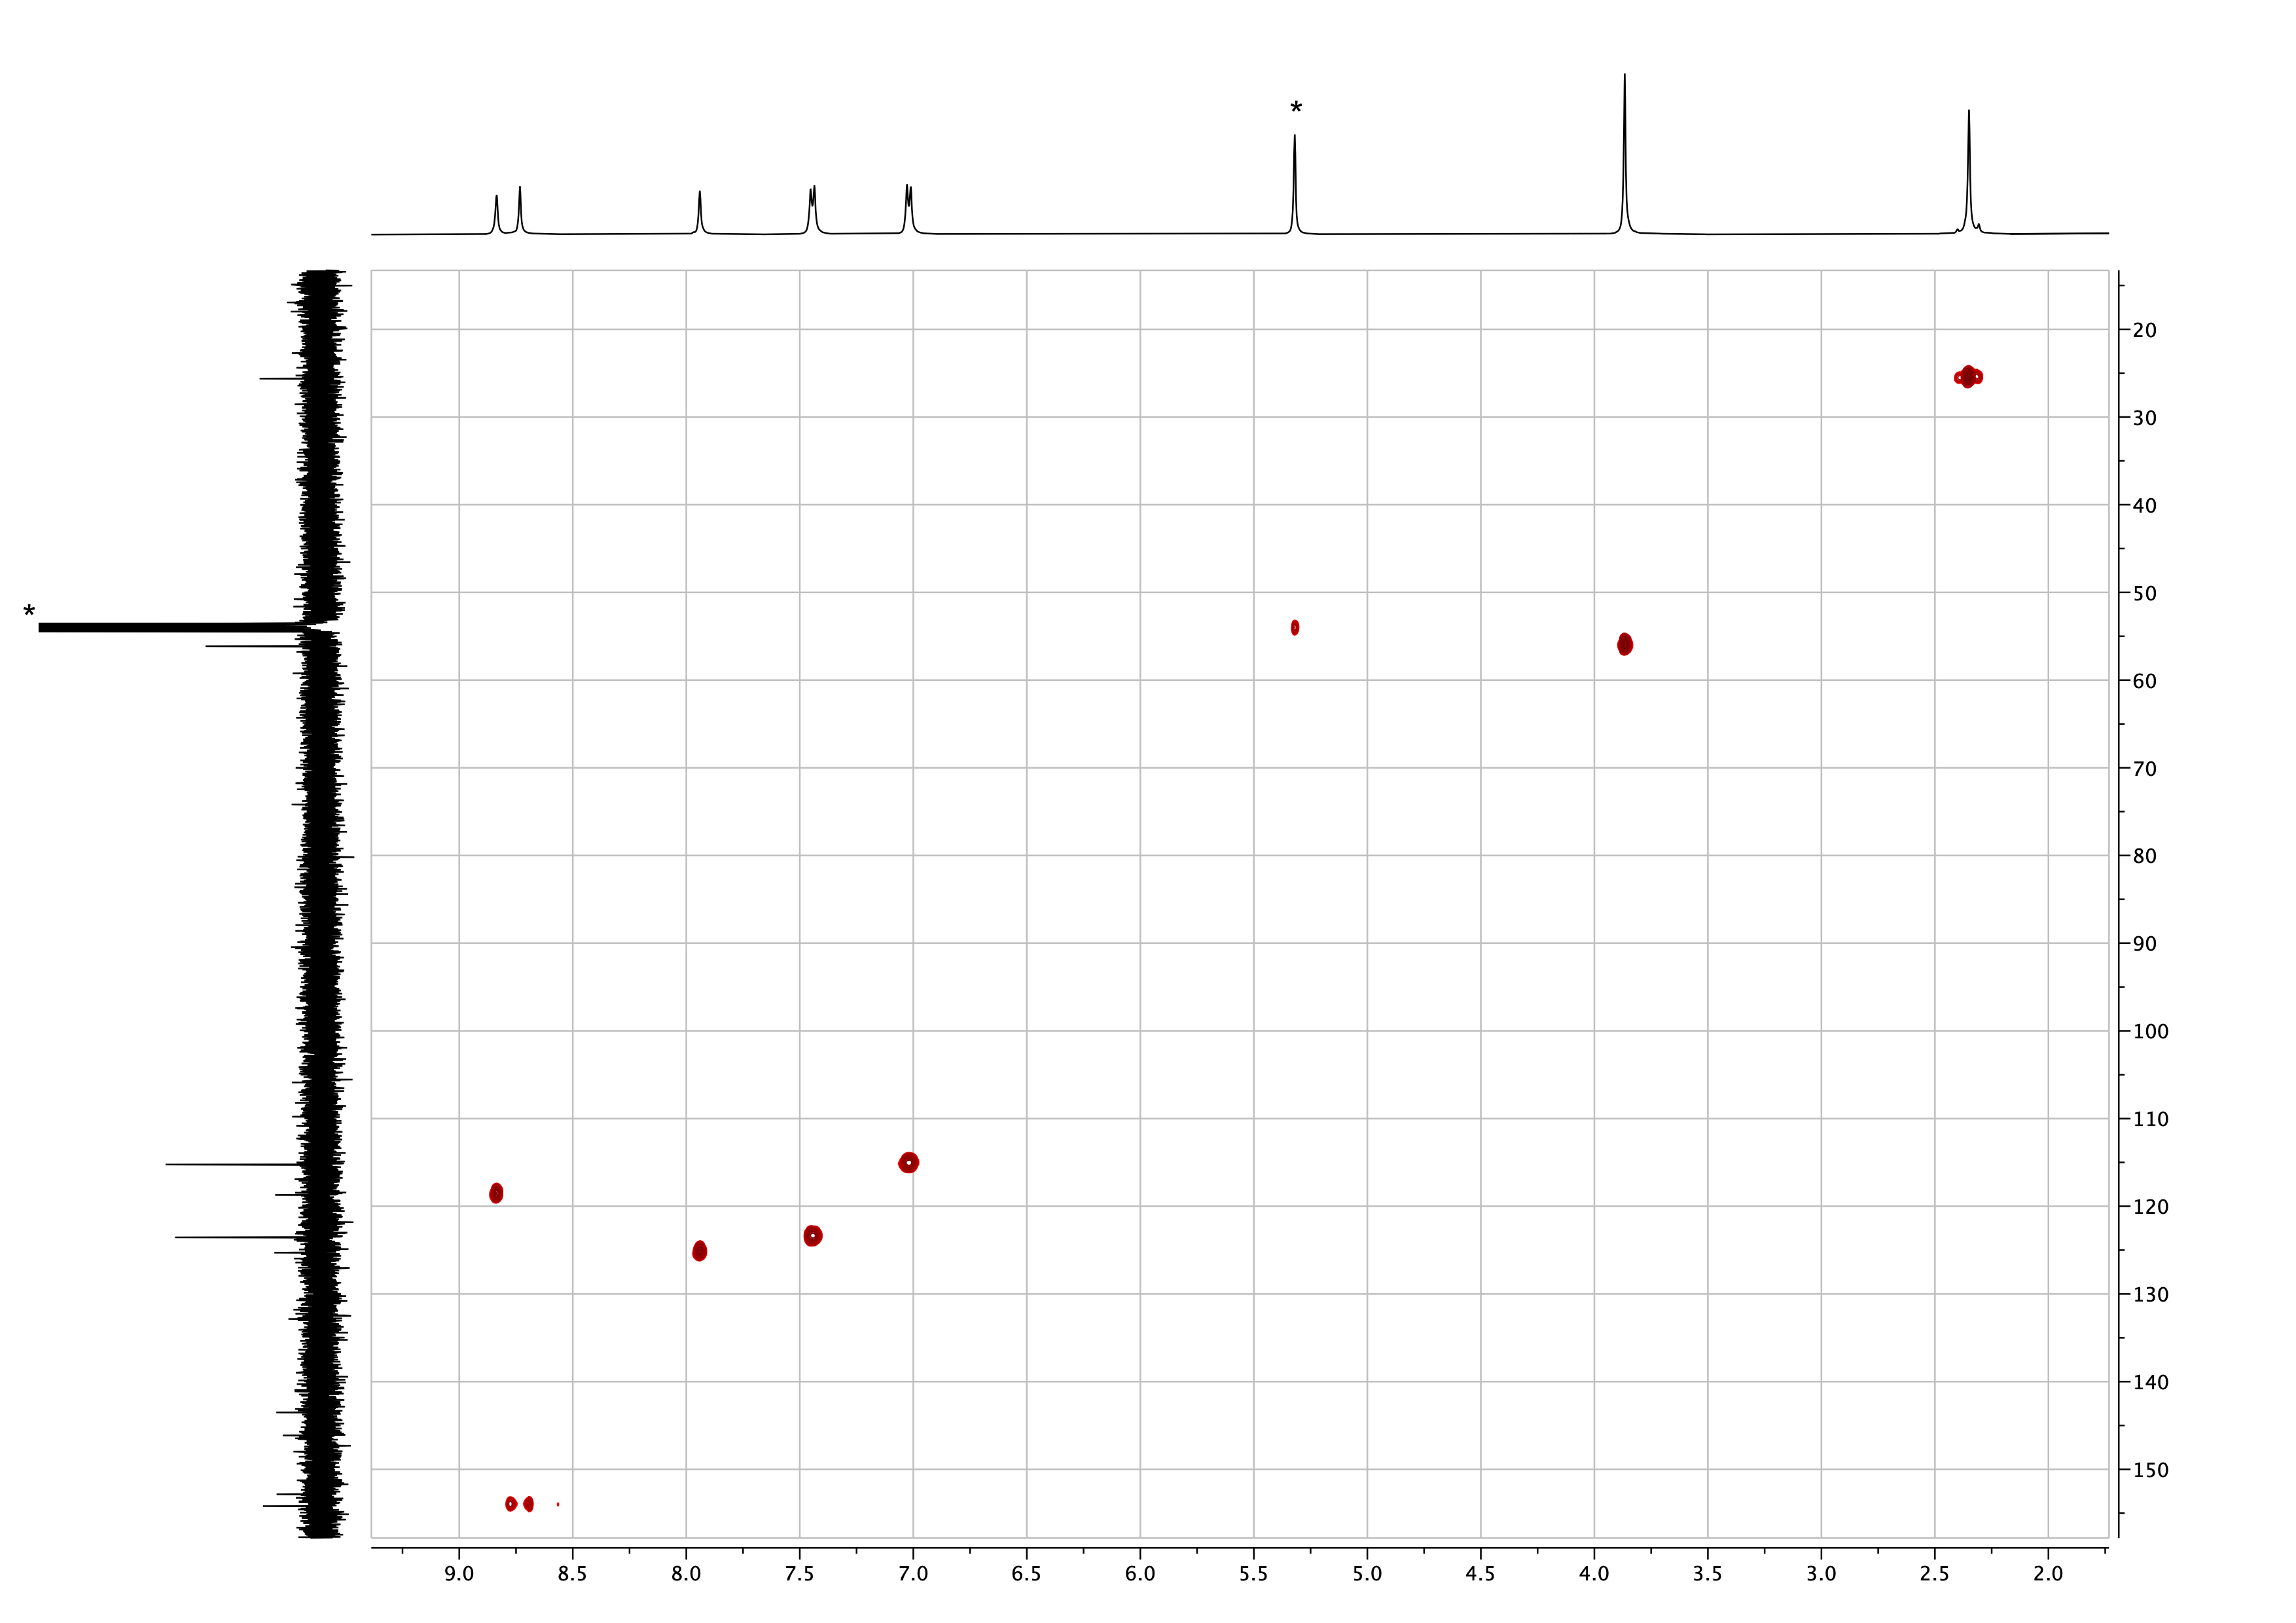


Figure S33. HMQC of complex [Cu(**4**)2][PF6](500 MHz 1H, 126 MHz 13C, CD2Cl2, 298 K). * = residual CHDCl2.


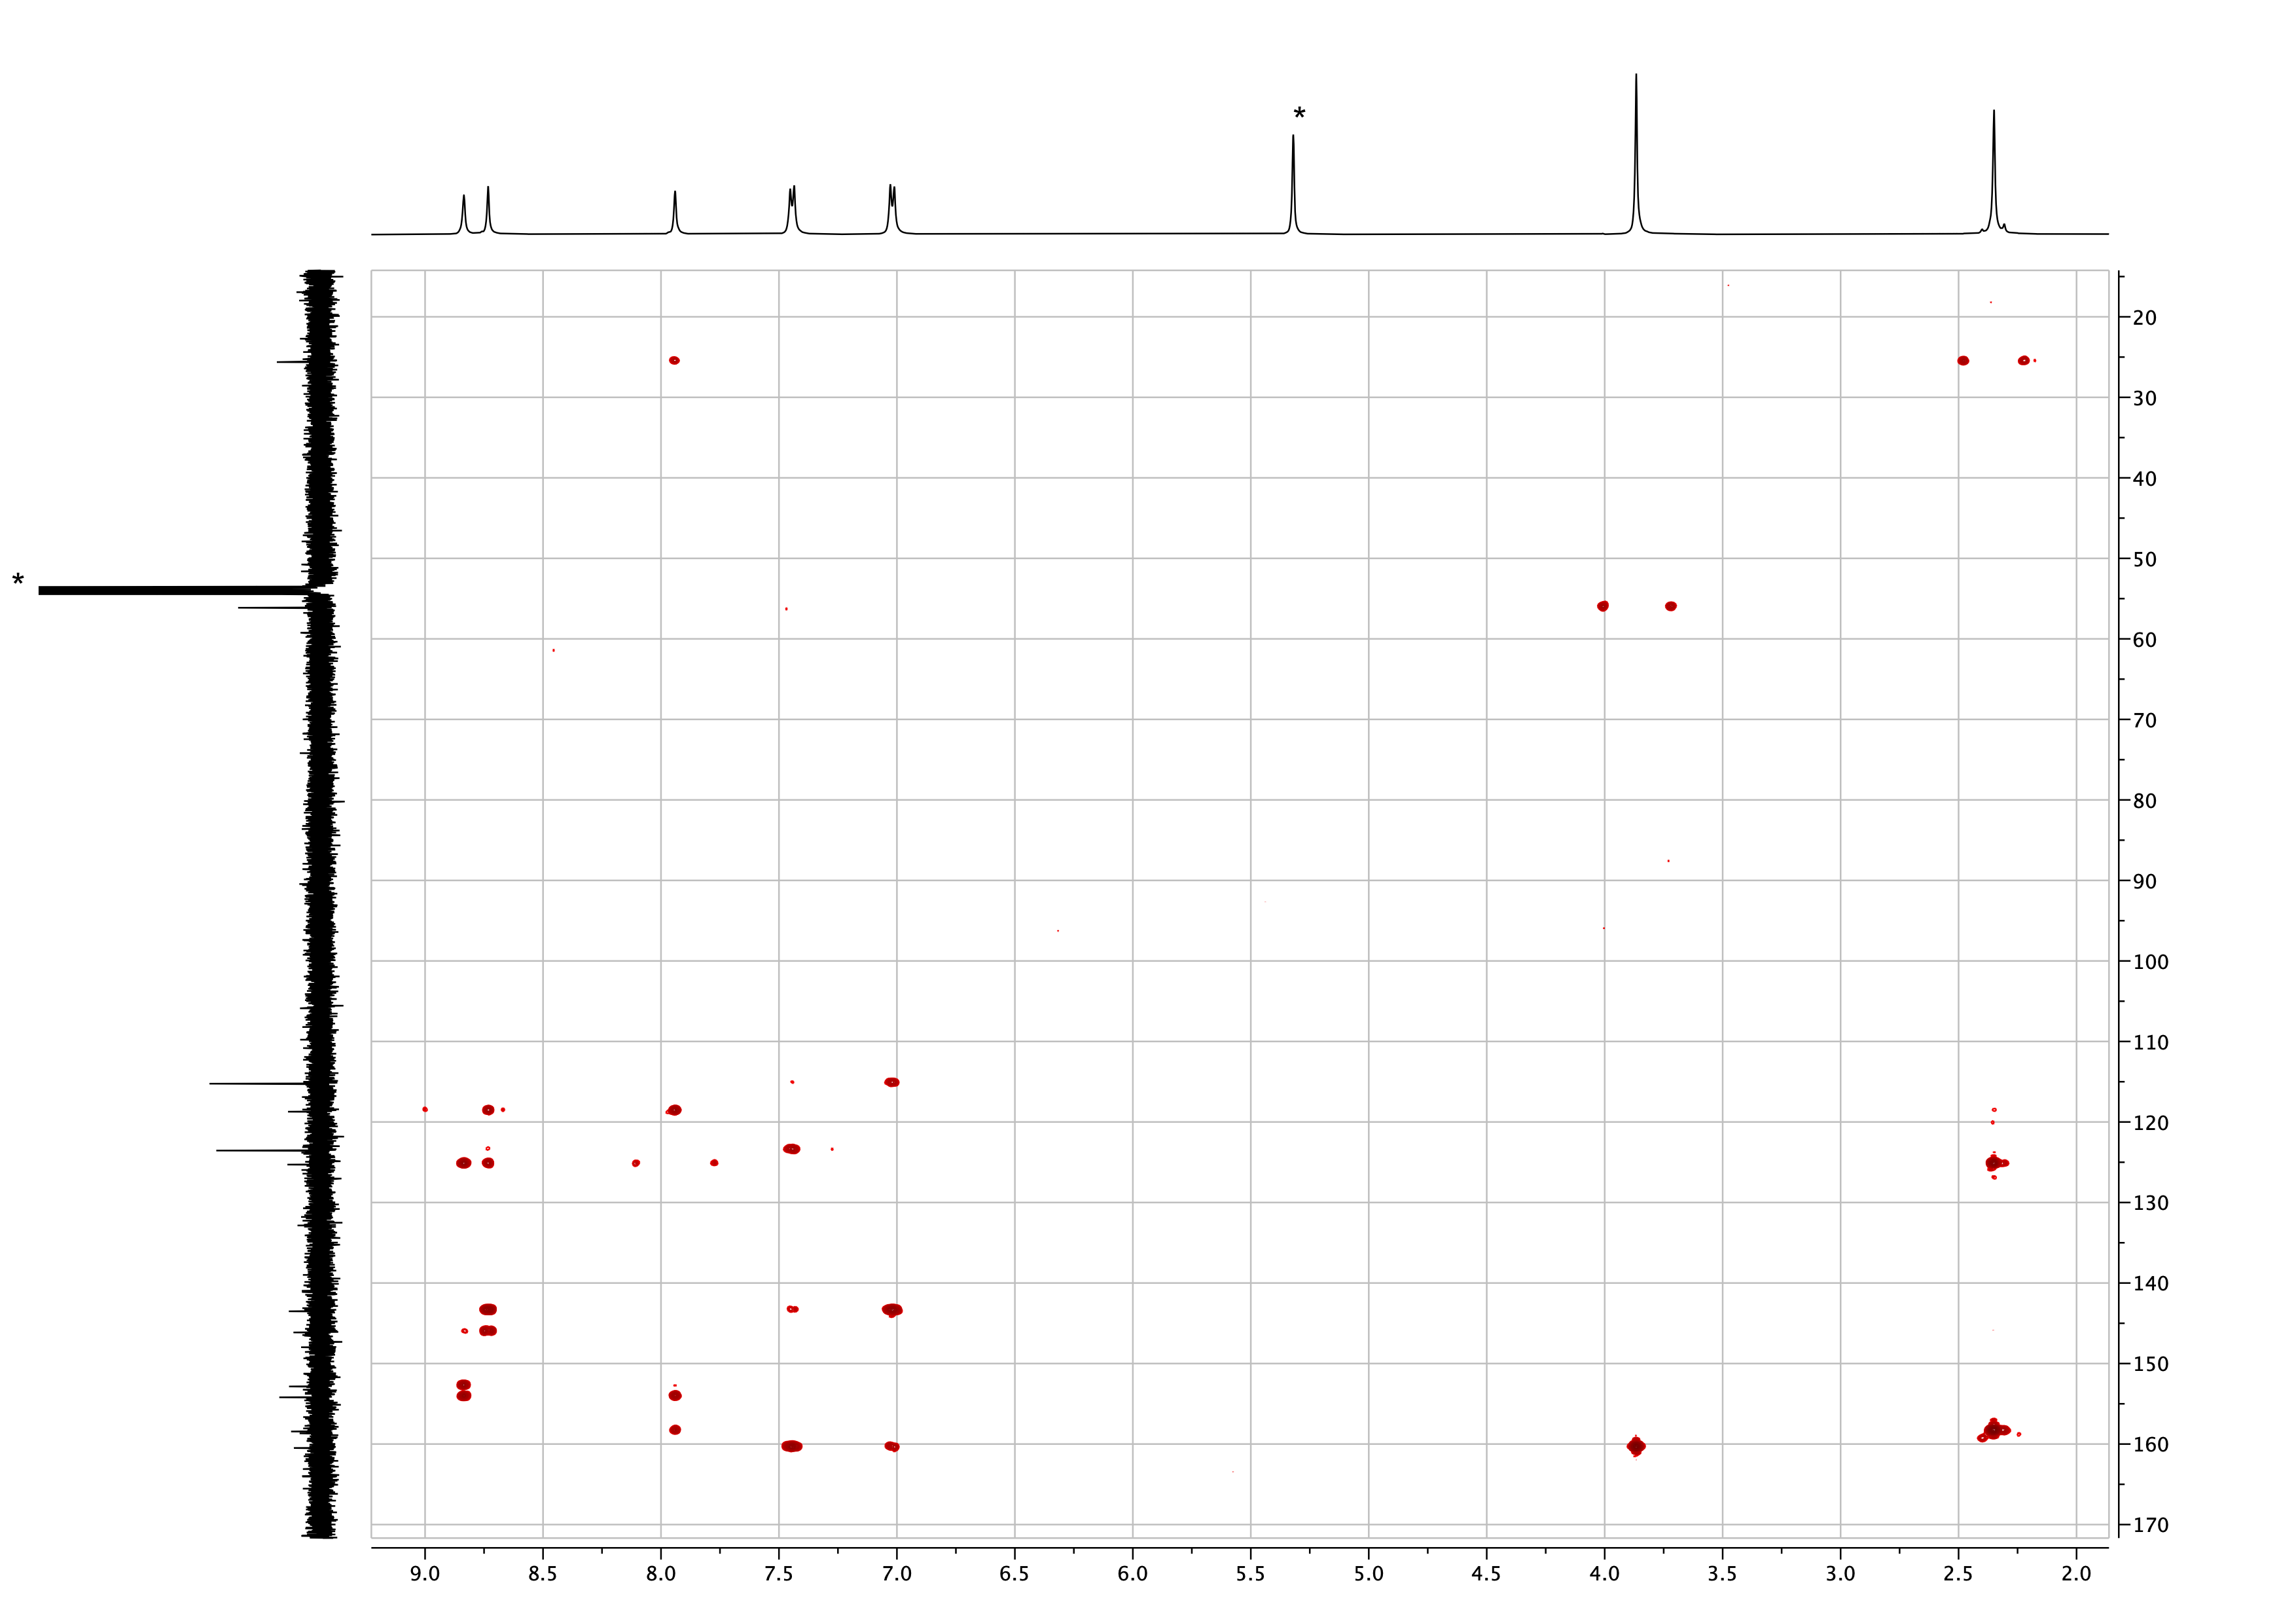


Figure S34. HMBC of complex [Cu(**4**)2][PF6](500 MHz 1H, 126 MHz 13C, CD2Cl2, 298 K). * = residual CHDCl2.


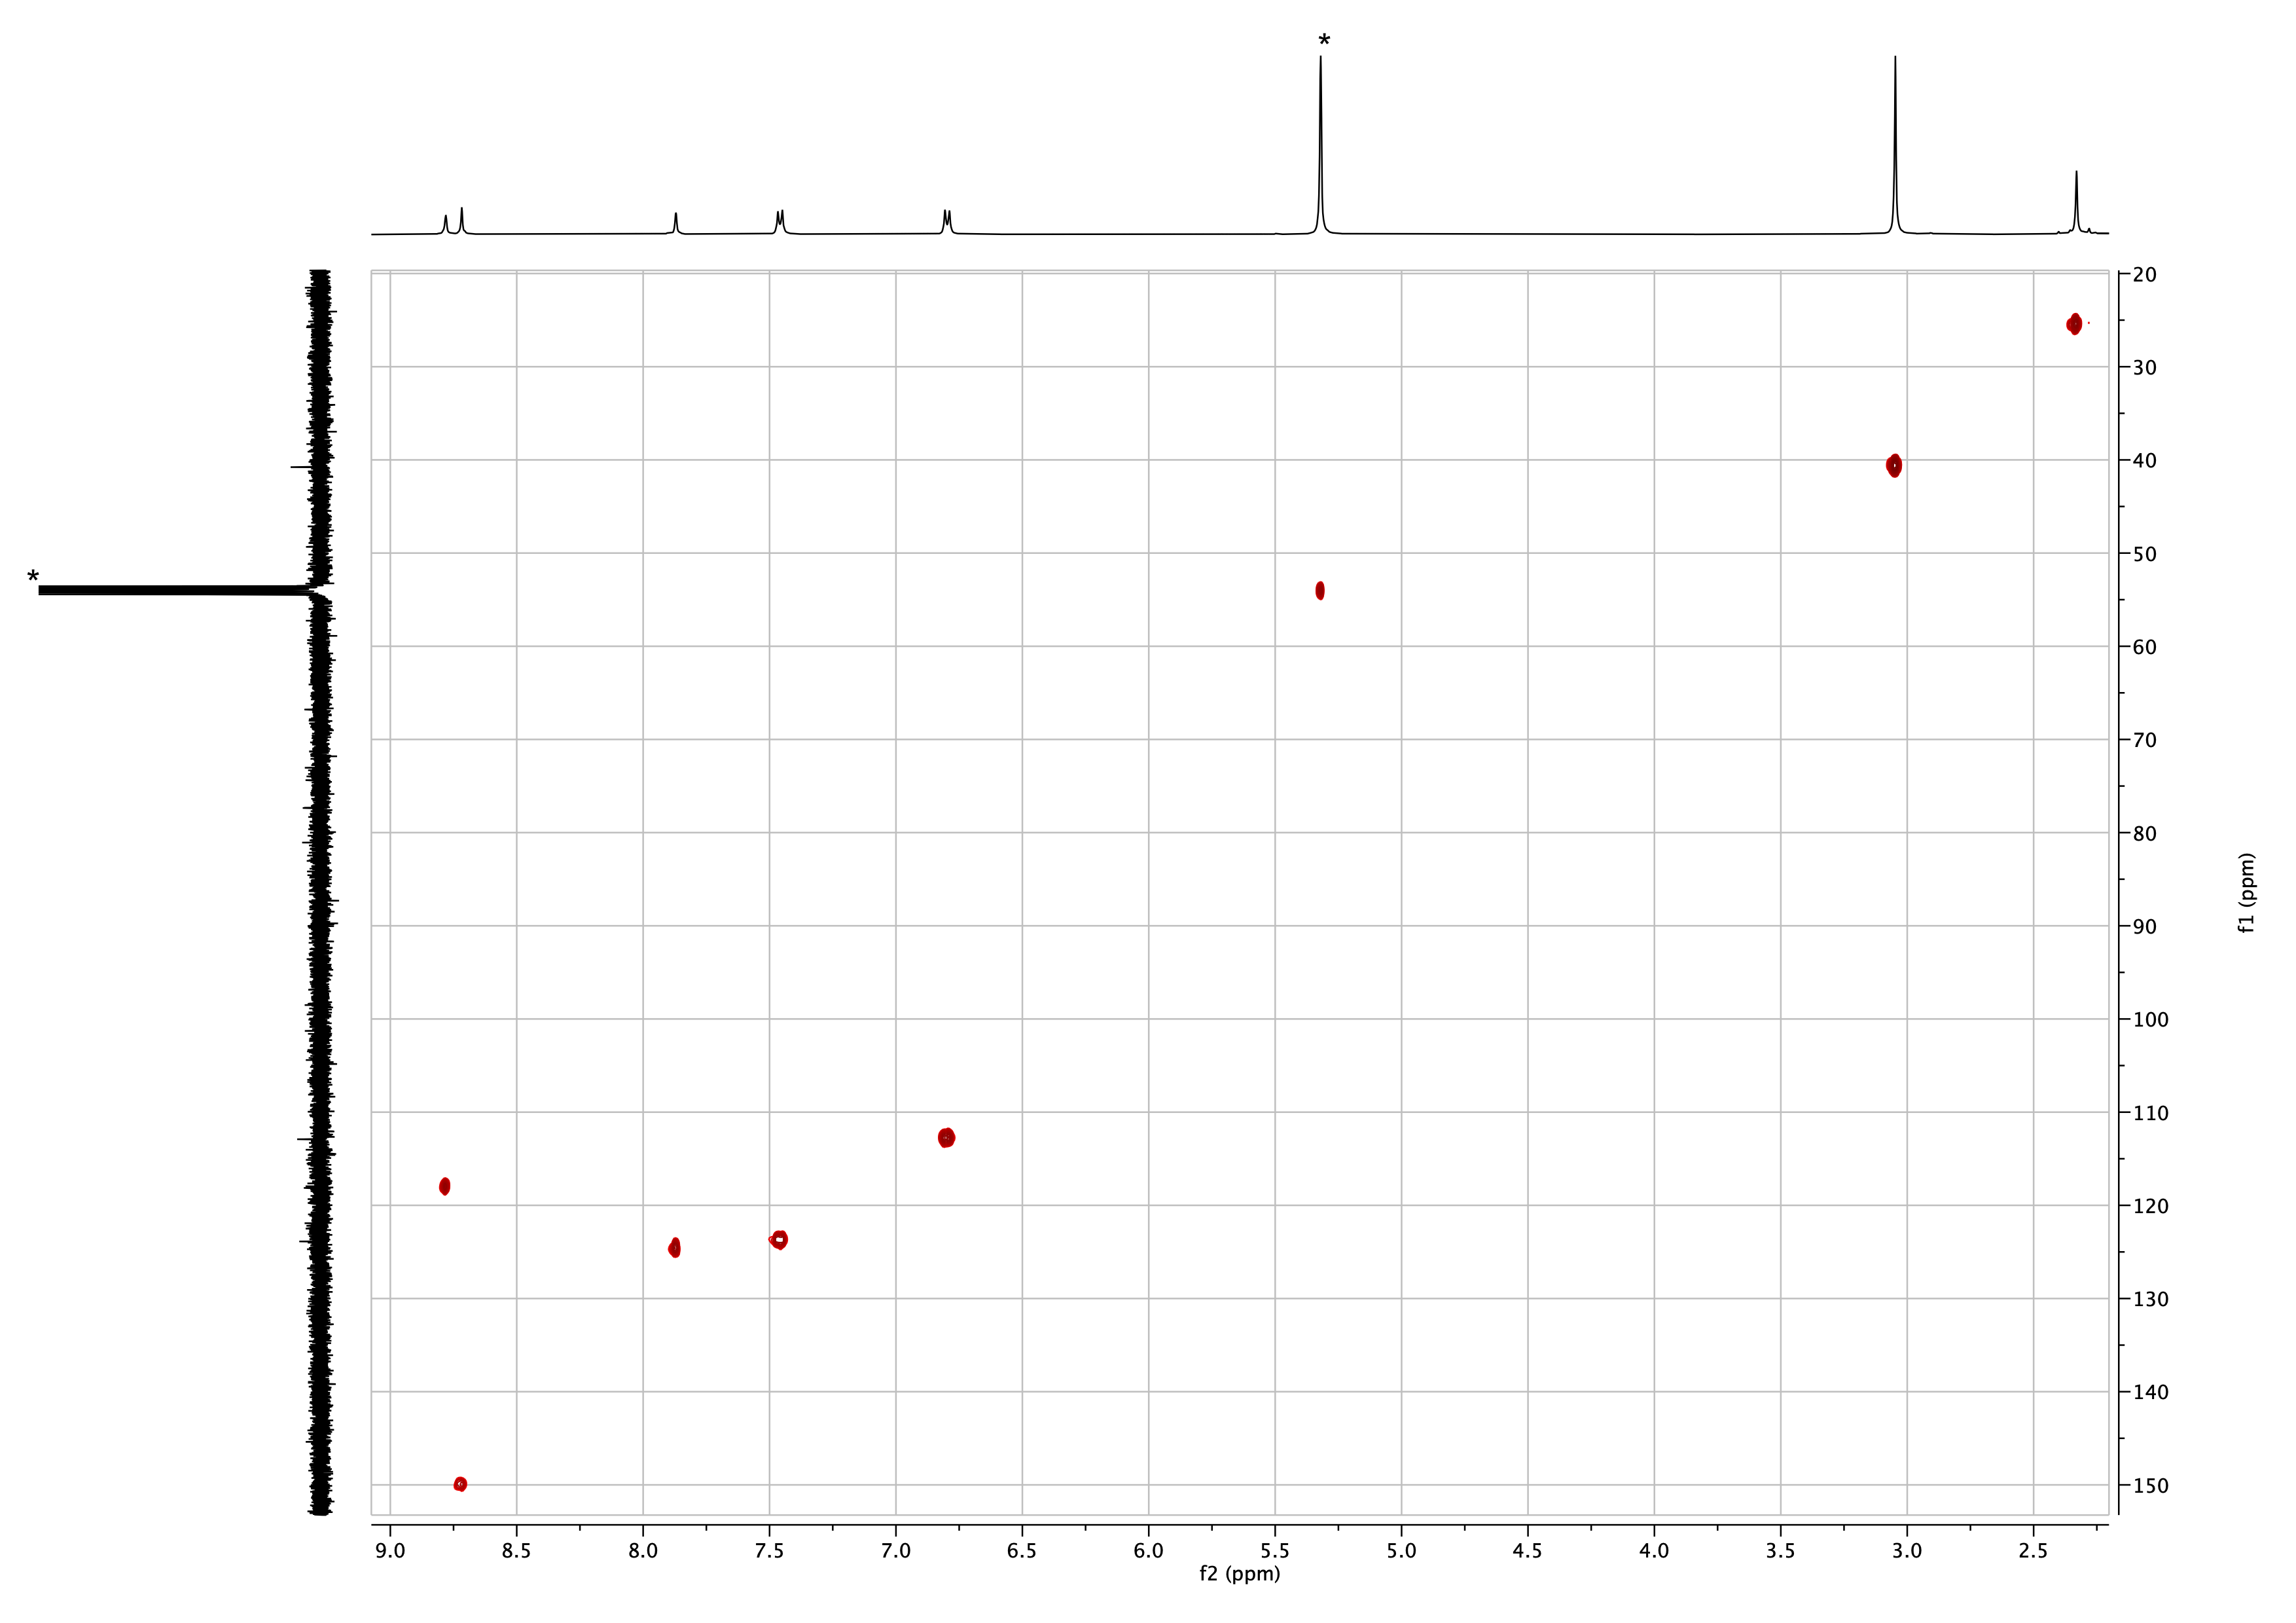


Figure S35. HMQC of complex [Cu(**5**)2][PF6](500 MHz 1H, 126 MHz 13C, CD2Cl2, 298 K). * = residual CHDCl2.


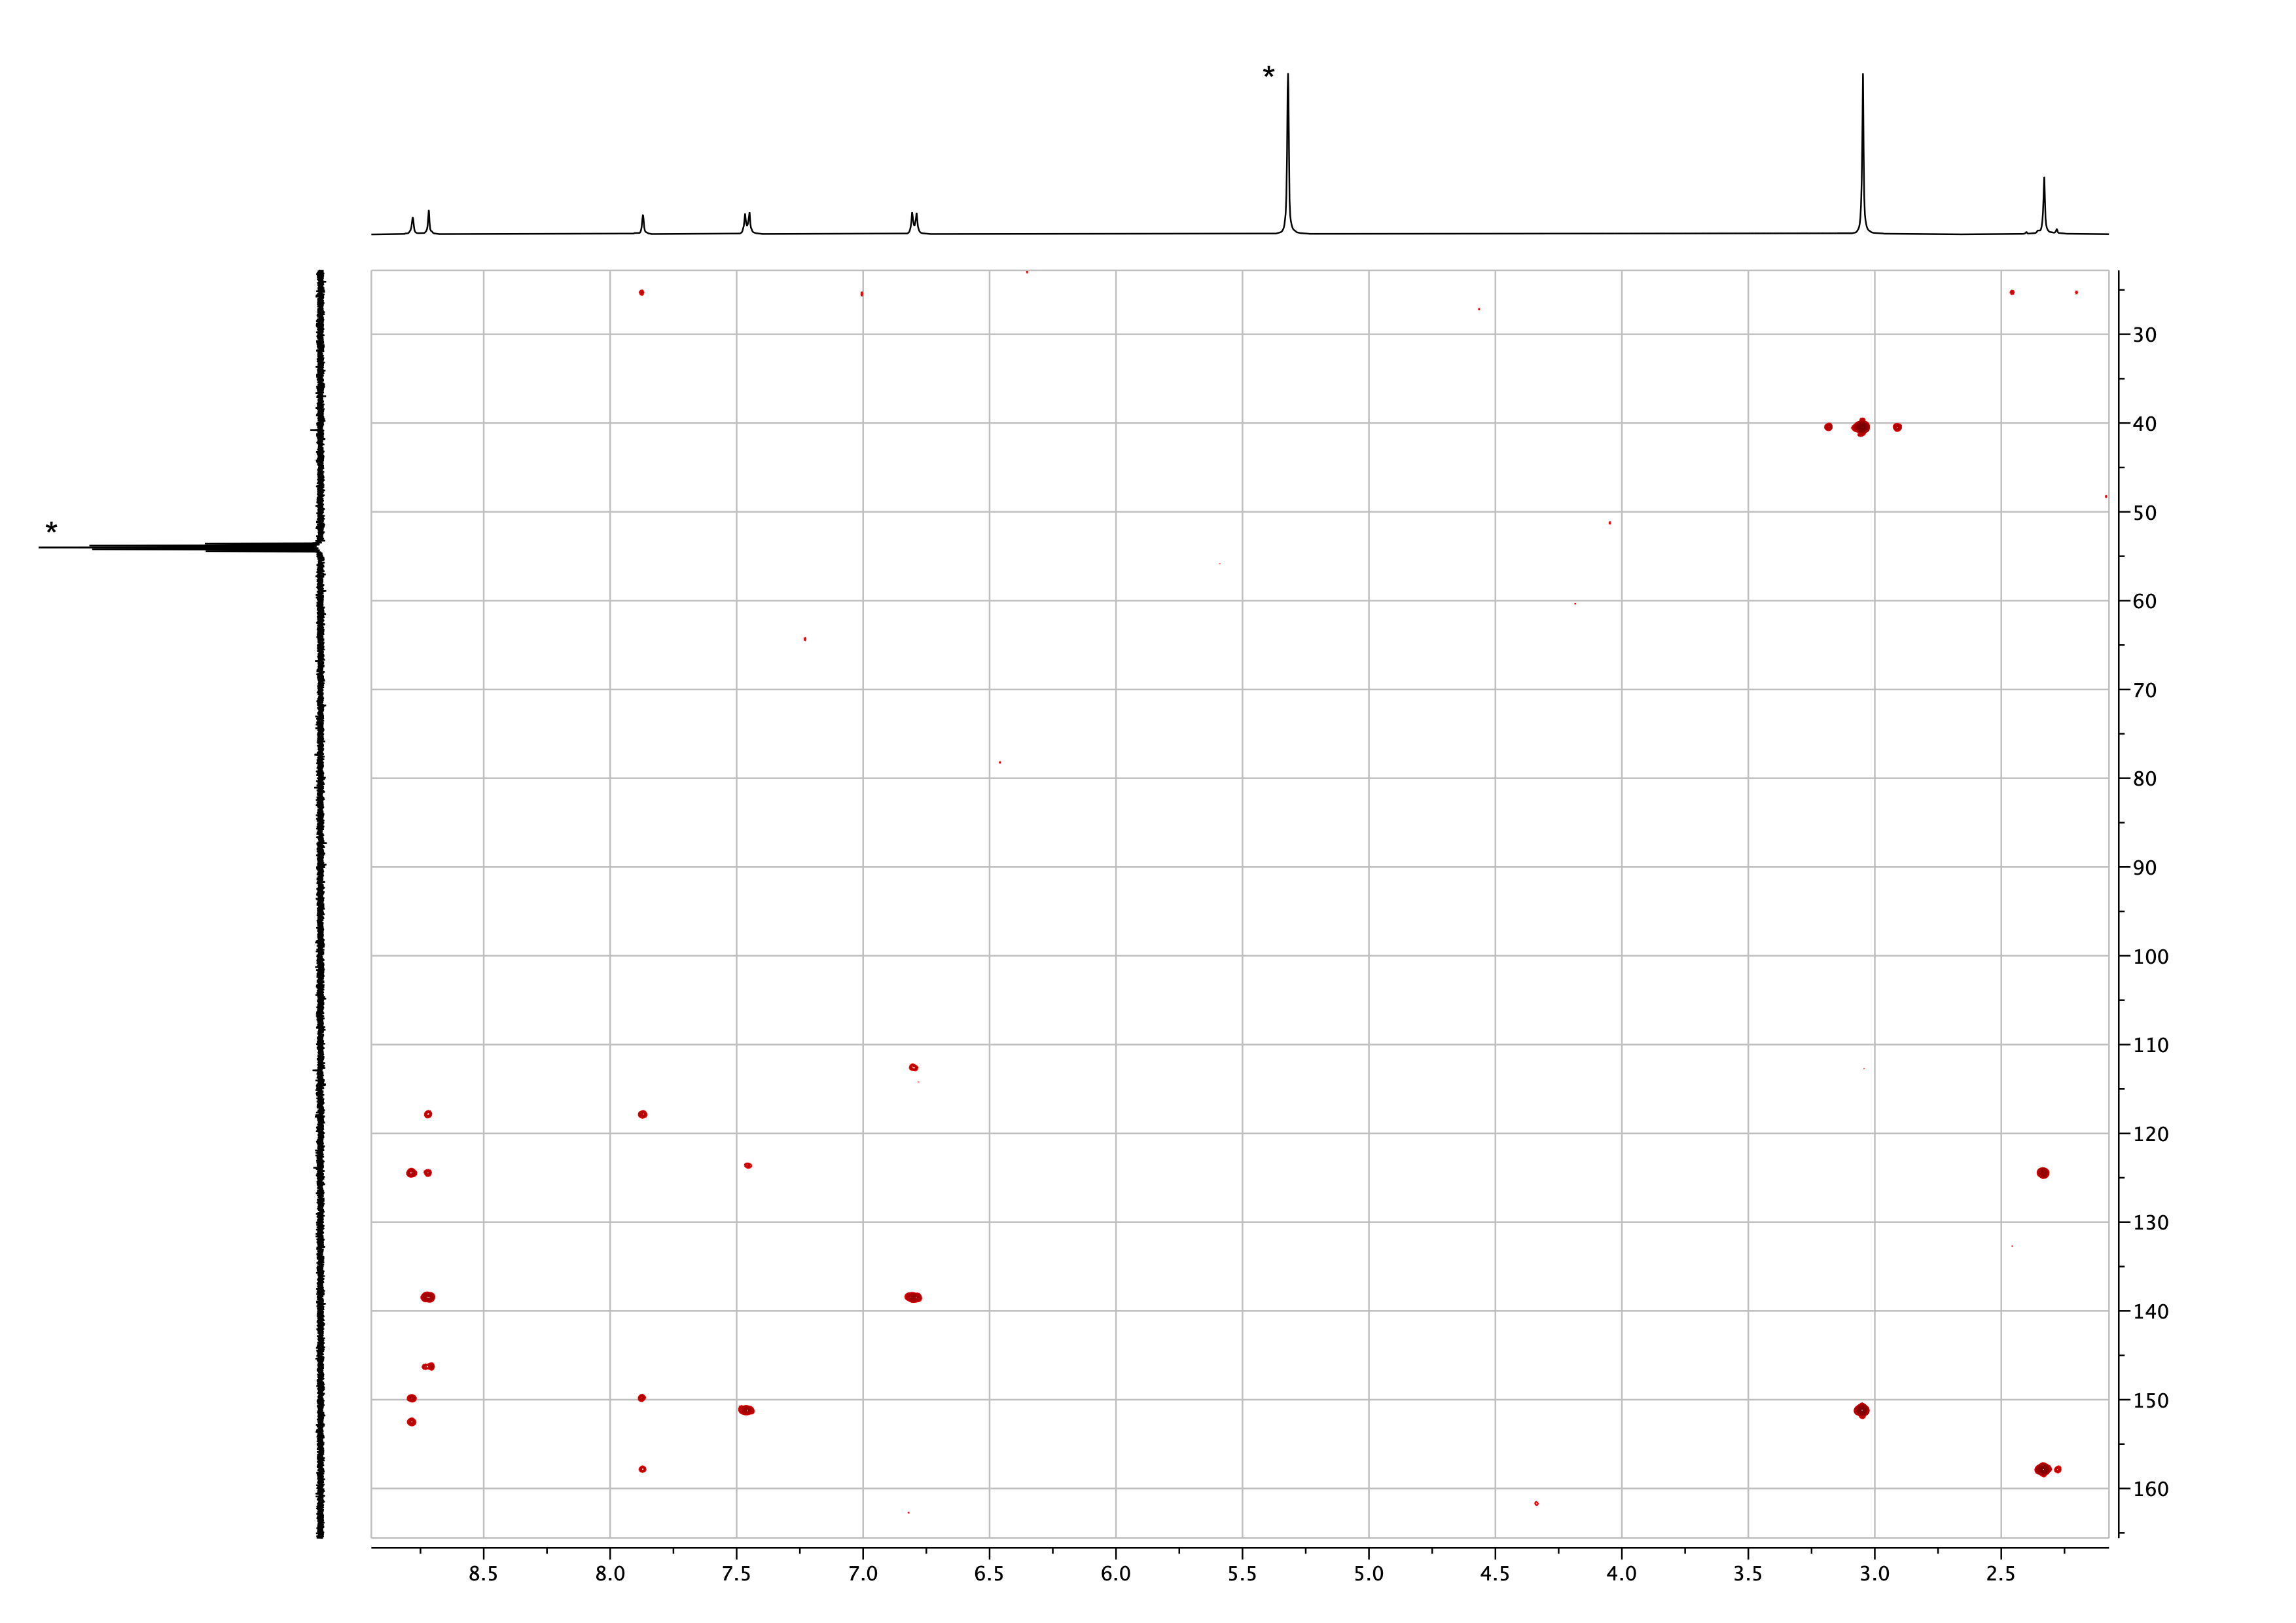
Figure S36. HMBC of complex [Cu(**5**)2][PF6](500 MHz 1H, 126 MHz 13C, CD2Cl2, 298 K). * = residual CHDCl2.


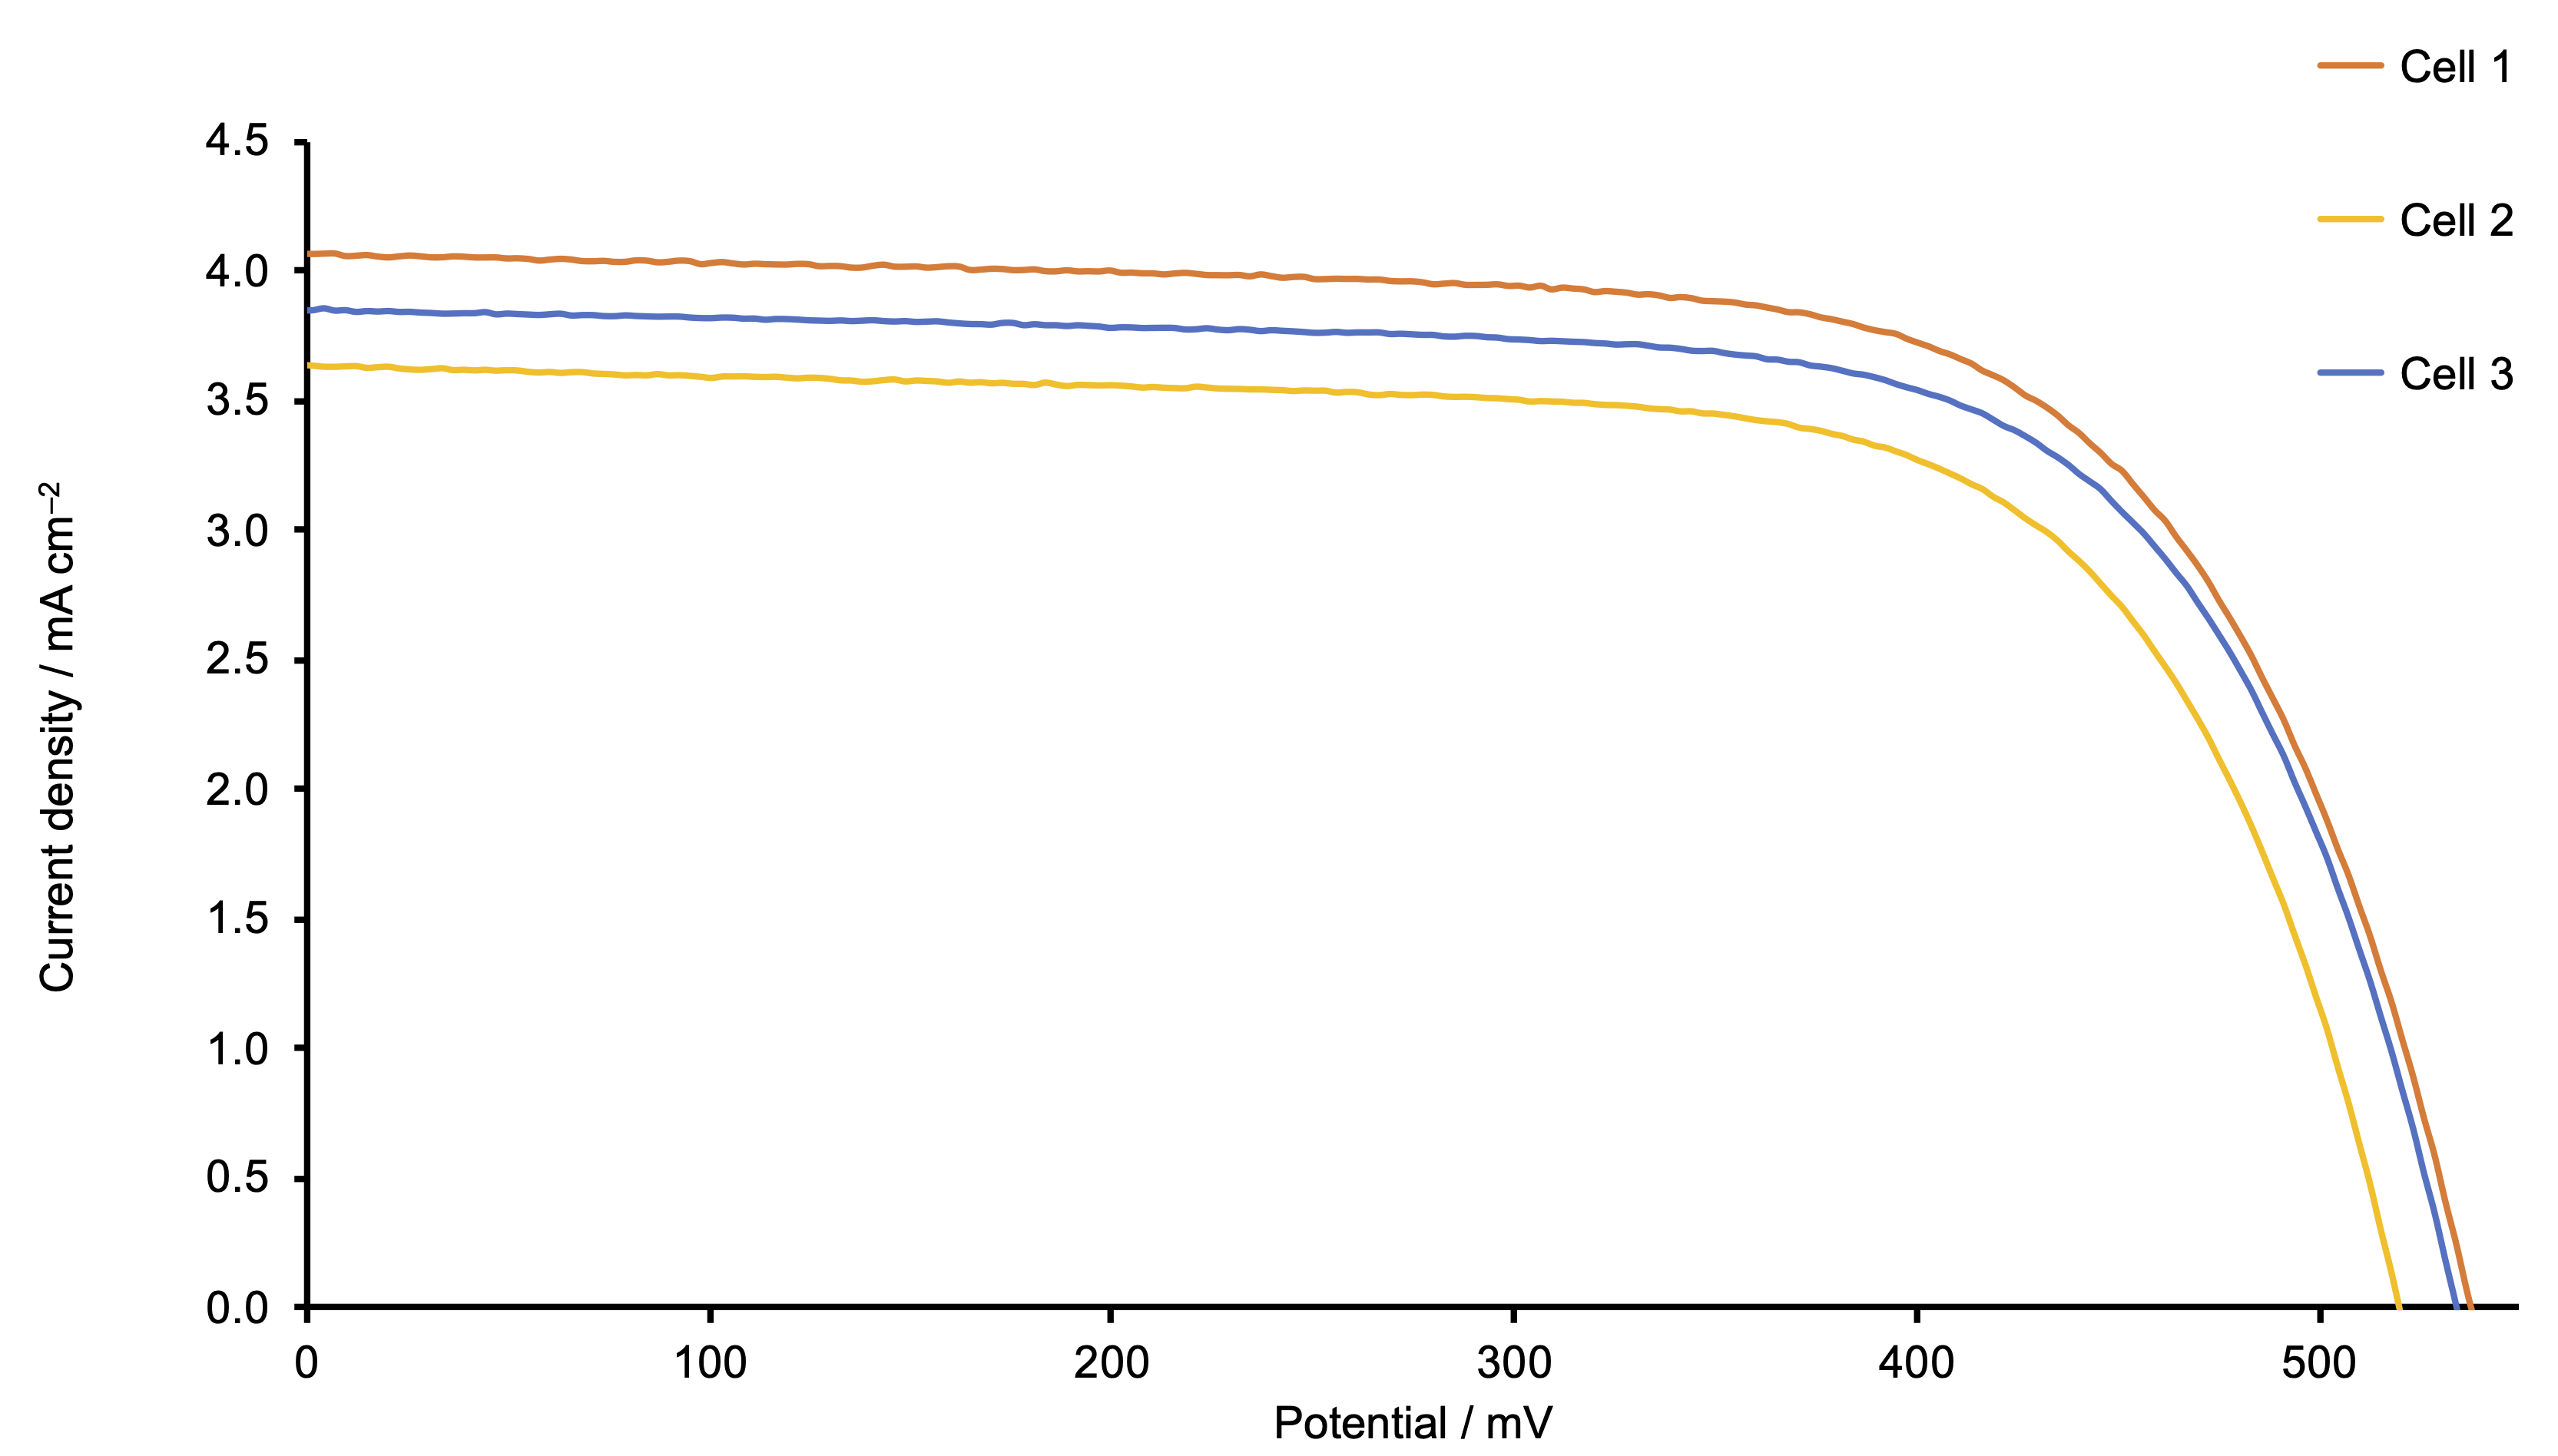


Figure S37. *J–V* curves for triplicate DSCs sensitized with [Cu(**6**)(**1**)]+. Measurements were made on the day of sealing the DSCs.


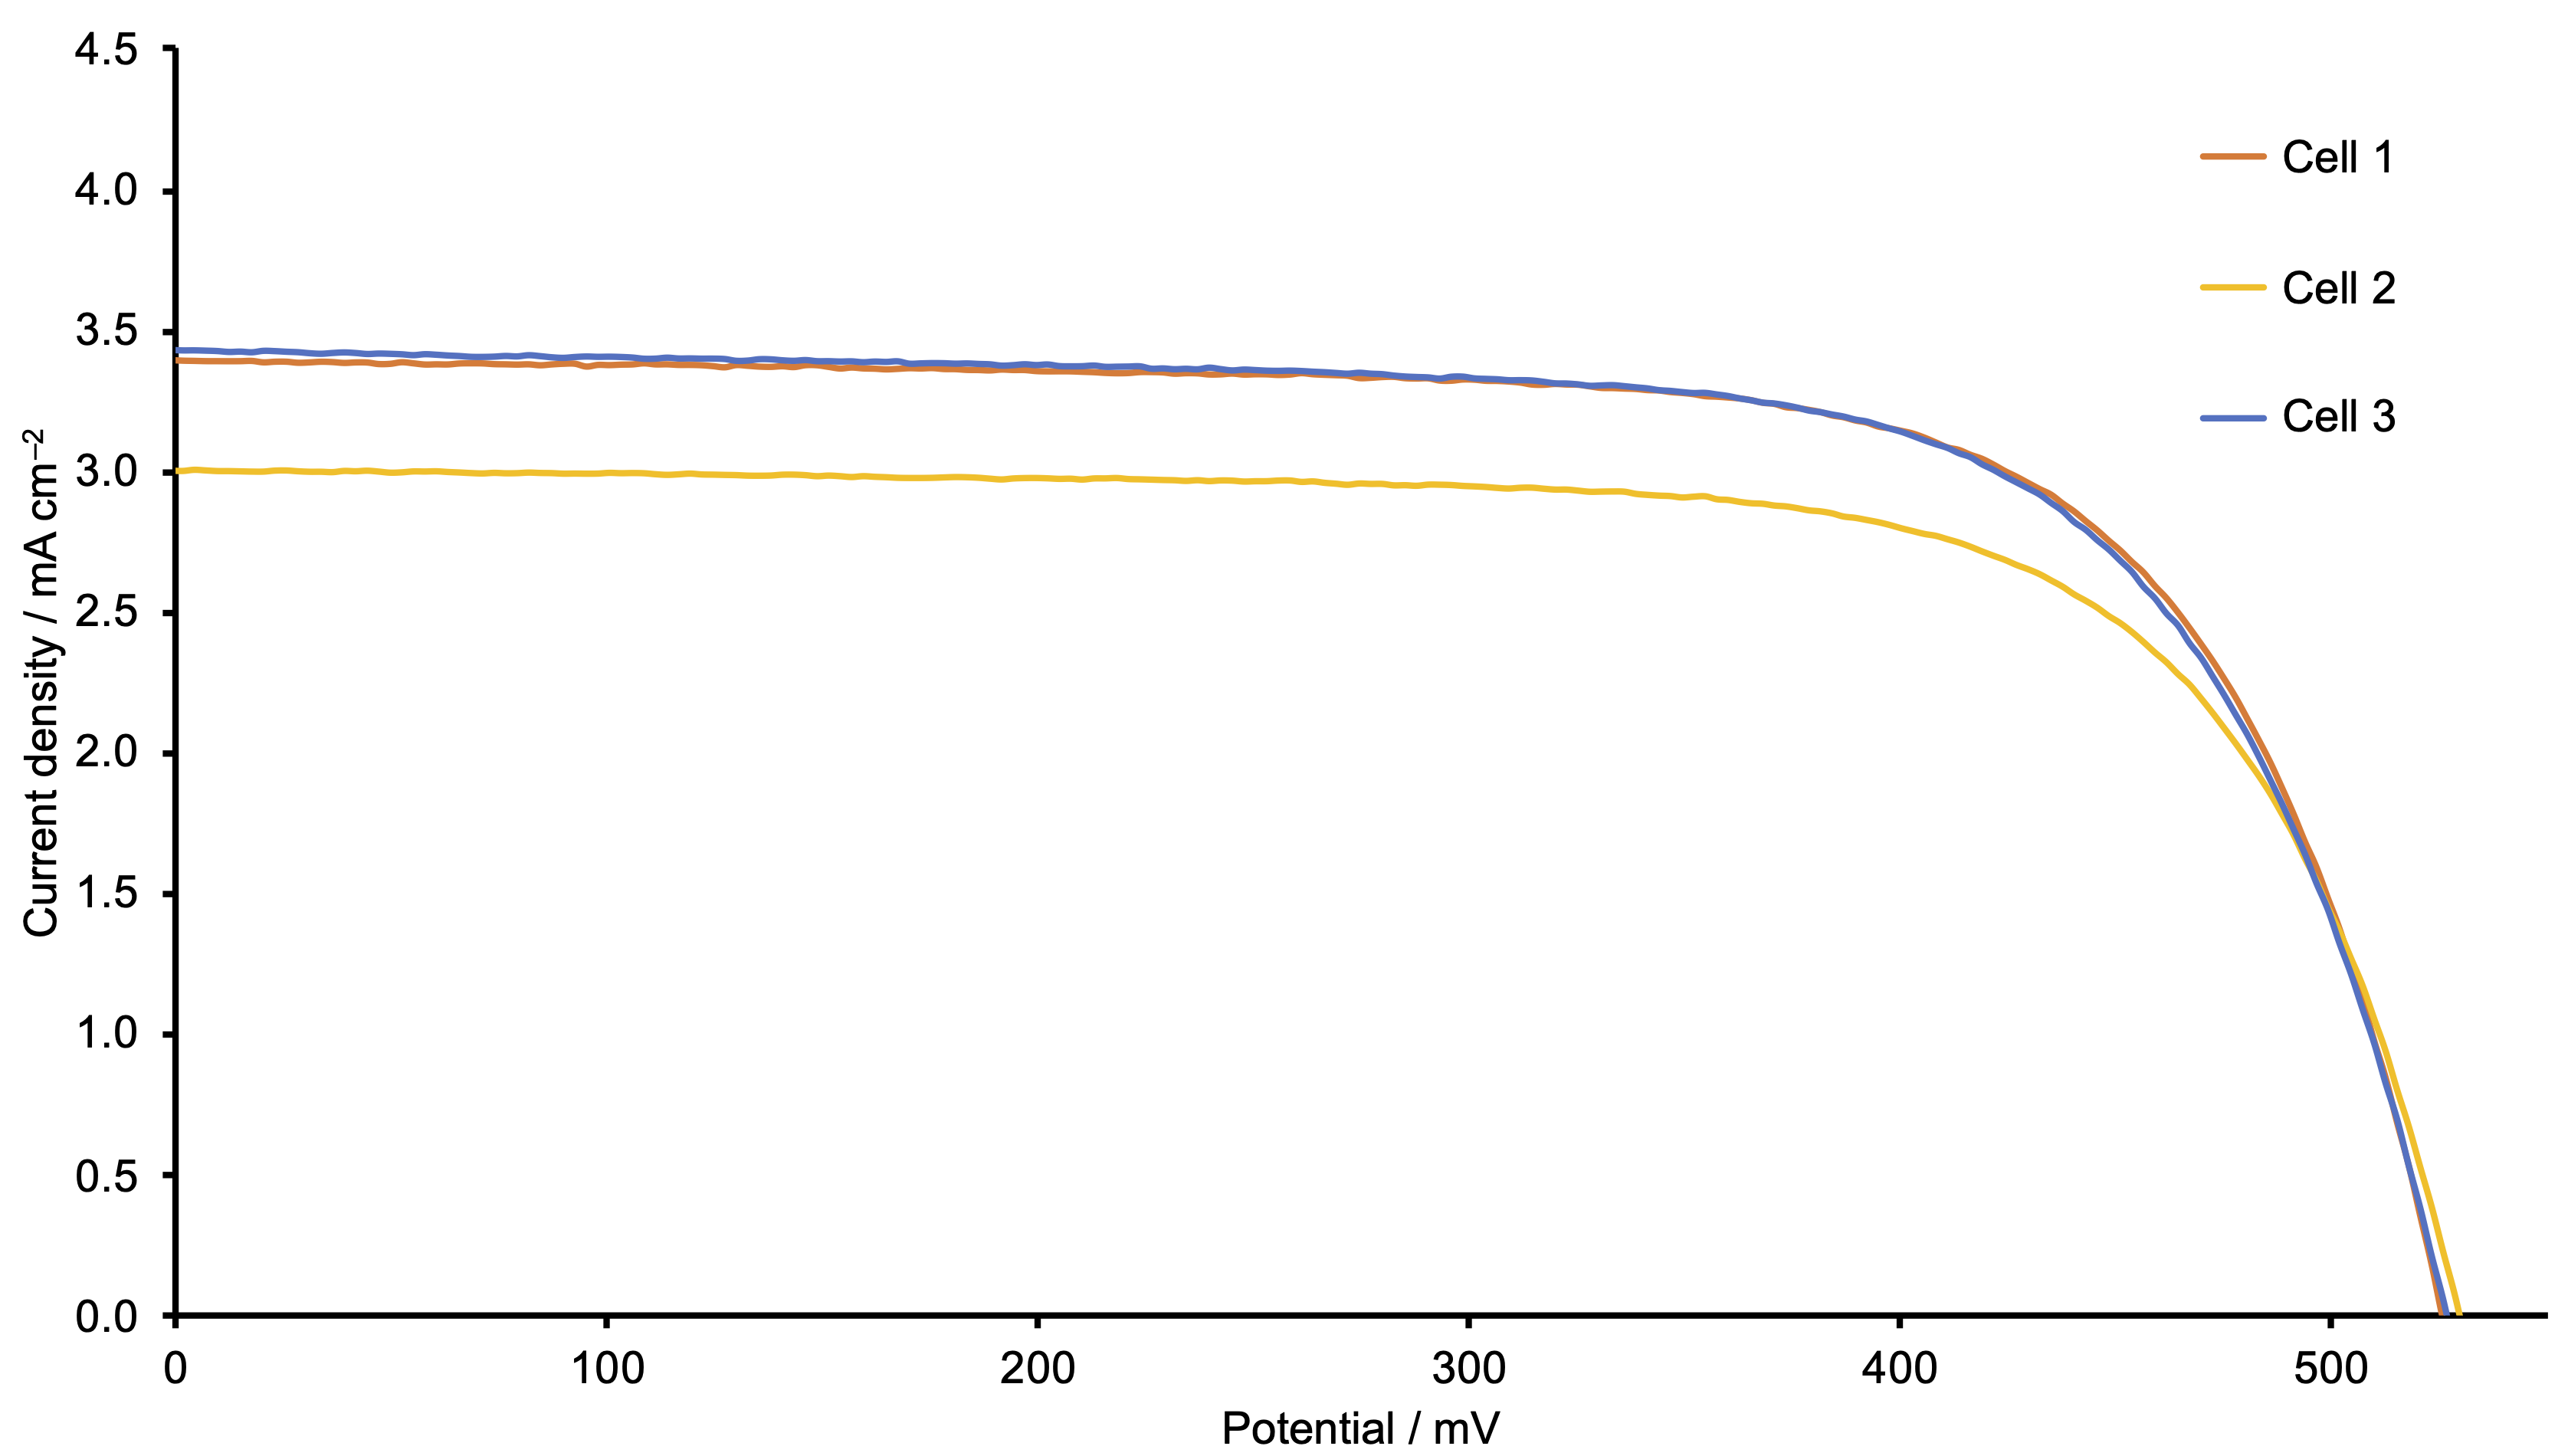


Figure S38. *J–V* curves for triplicate DSCs sensitized with [Cu(**6**)(**2**)]+. Measurements were made on the day of sealing the DSCs.


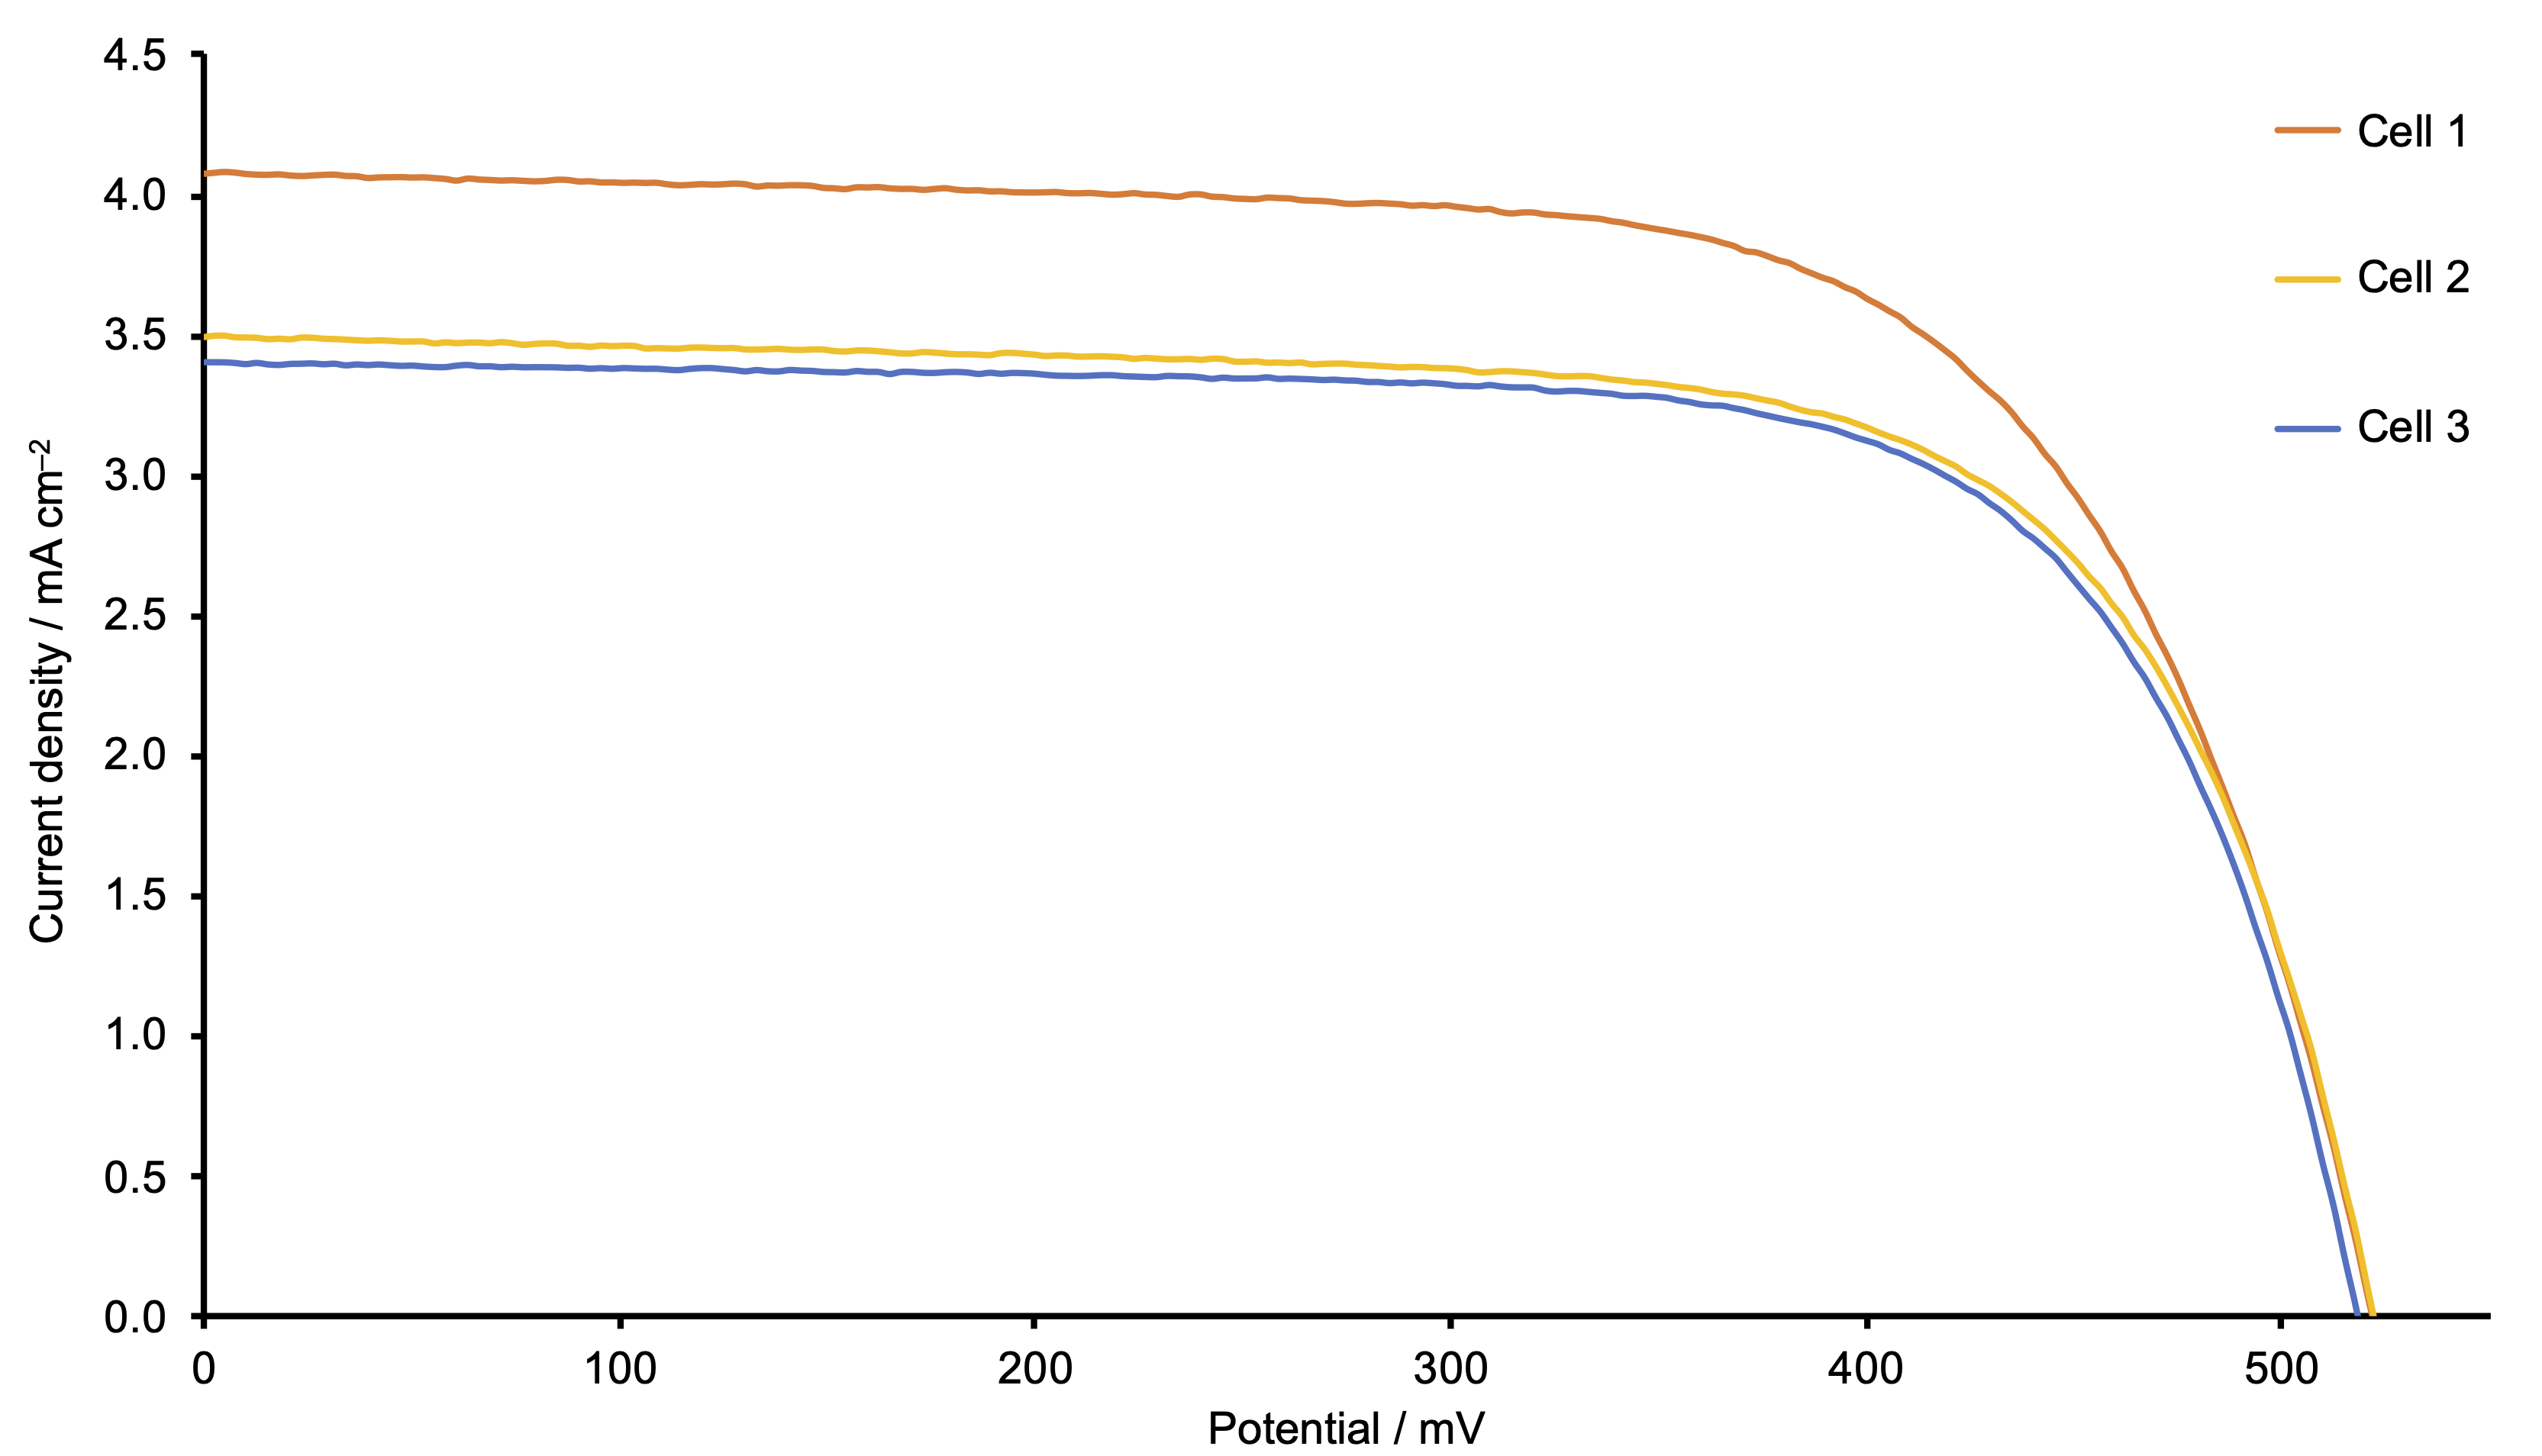


Figure S39. *J–V* curves for triplicate DSCs sensitized with [Cu(**6**)(**3**)]+. Measurements were made on the day of sealing the DSCs.


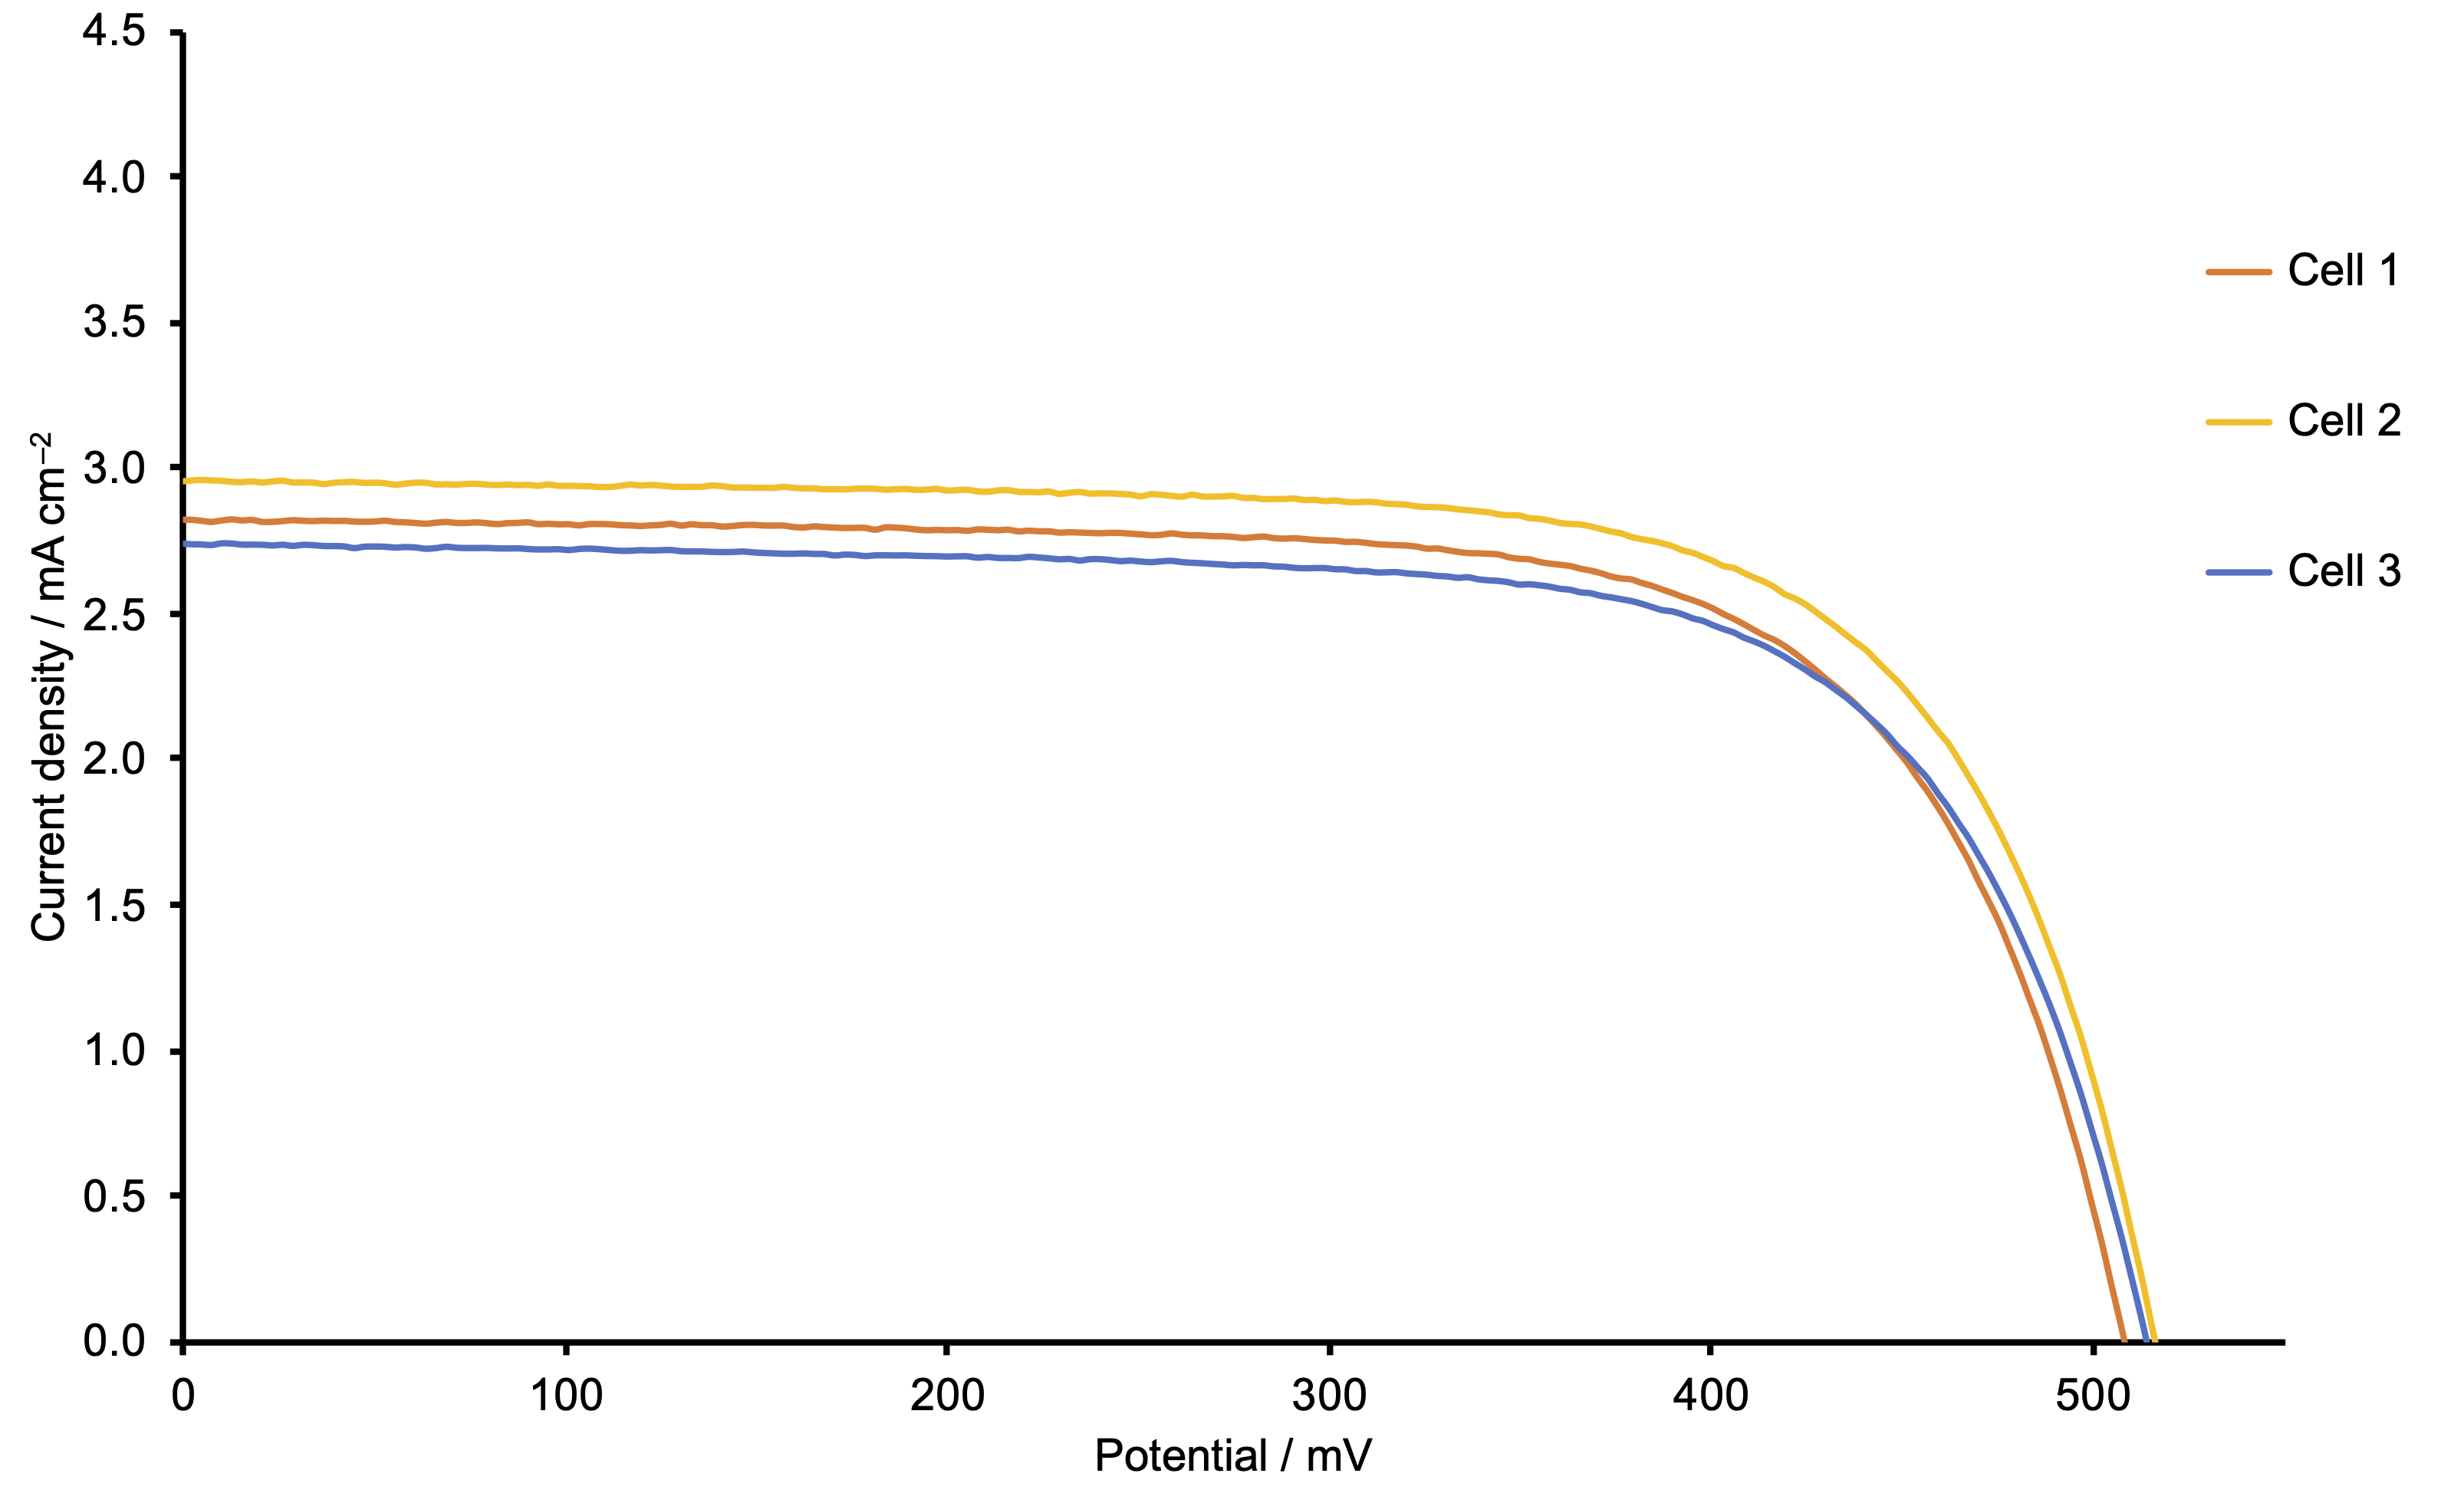


Figure S40. *J–V* curves for triplicate DSCs sensitized with [Cu(**6**)(**4**)]+. Measurements were made on the day of sealing the DSCs.


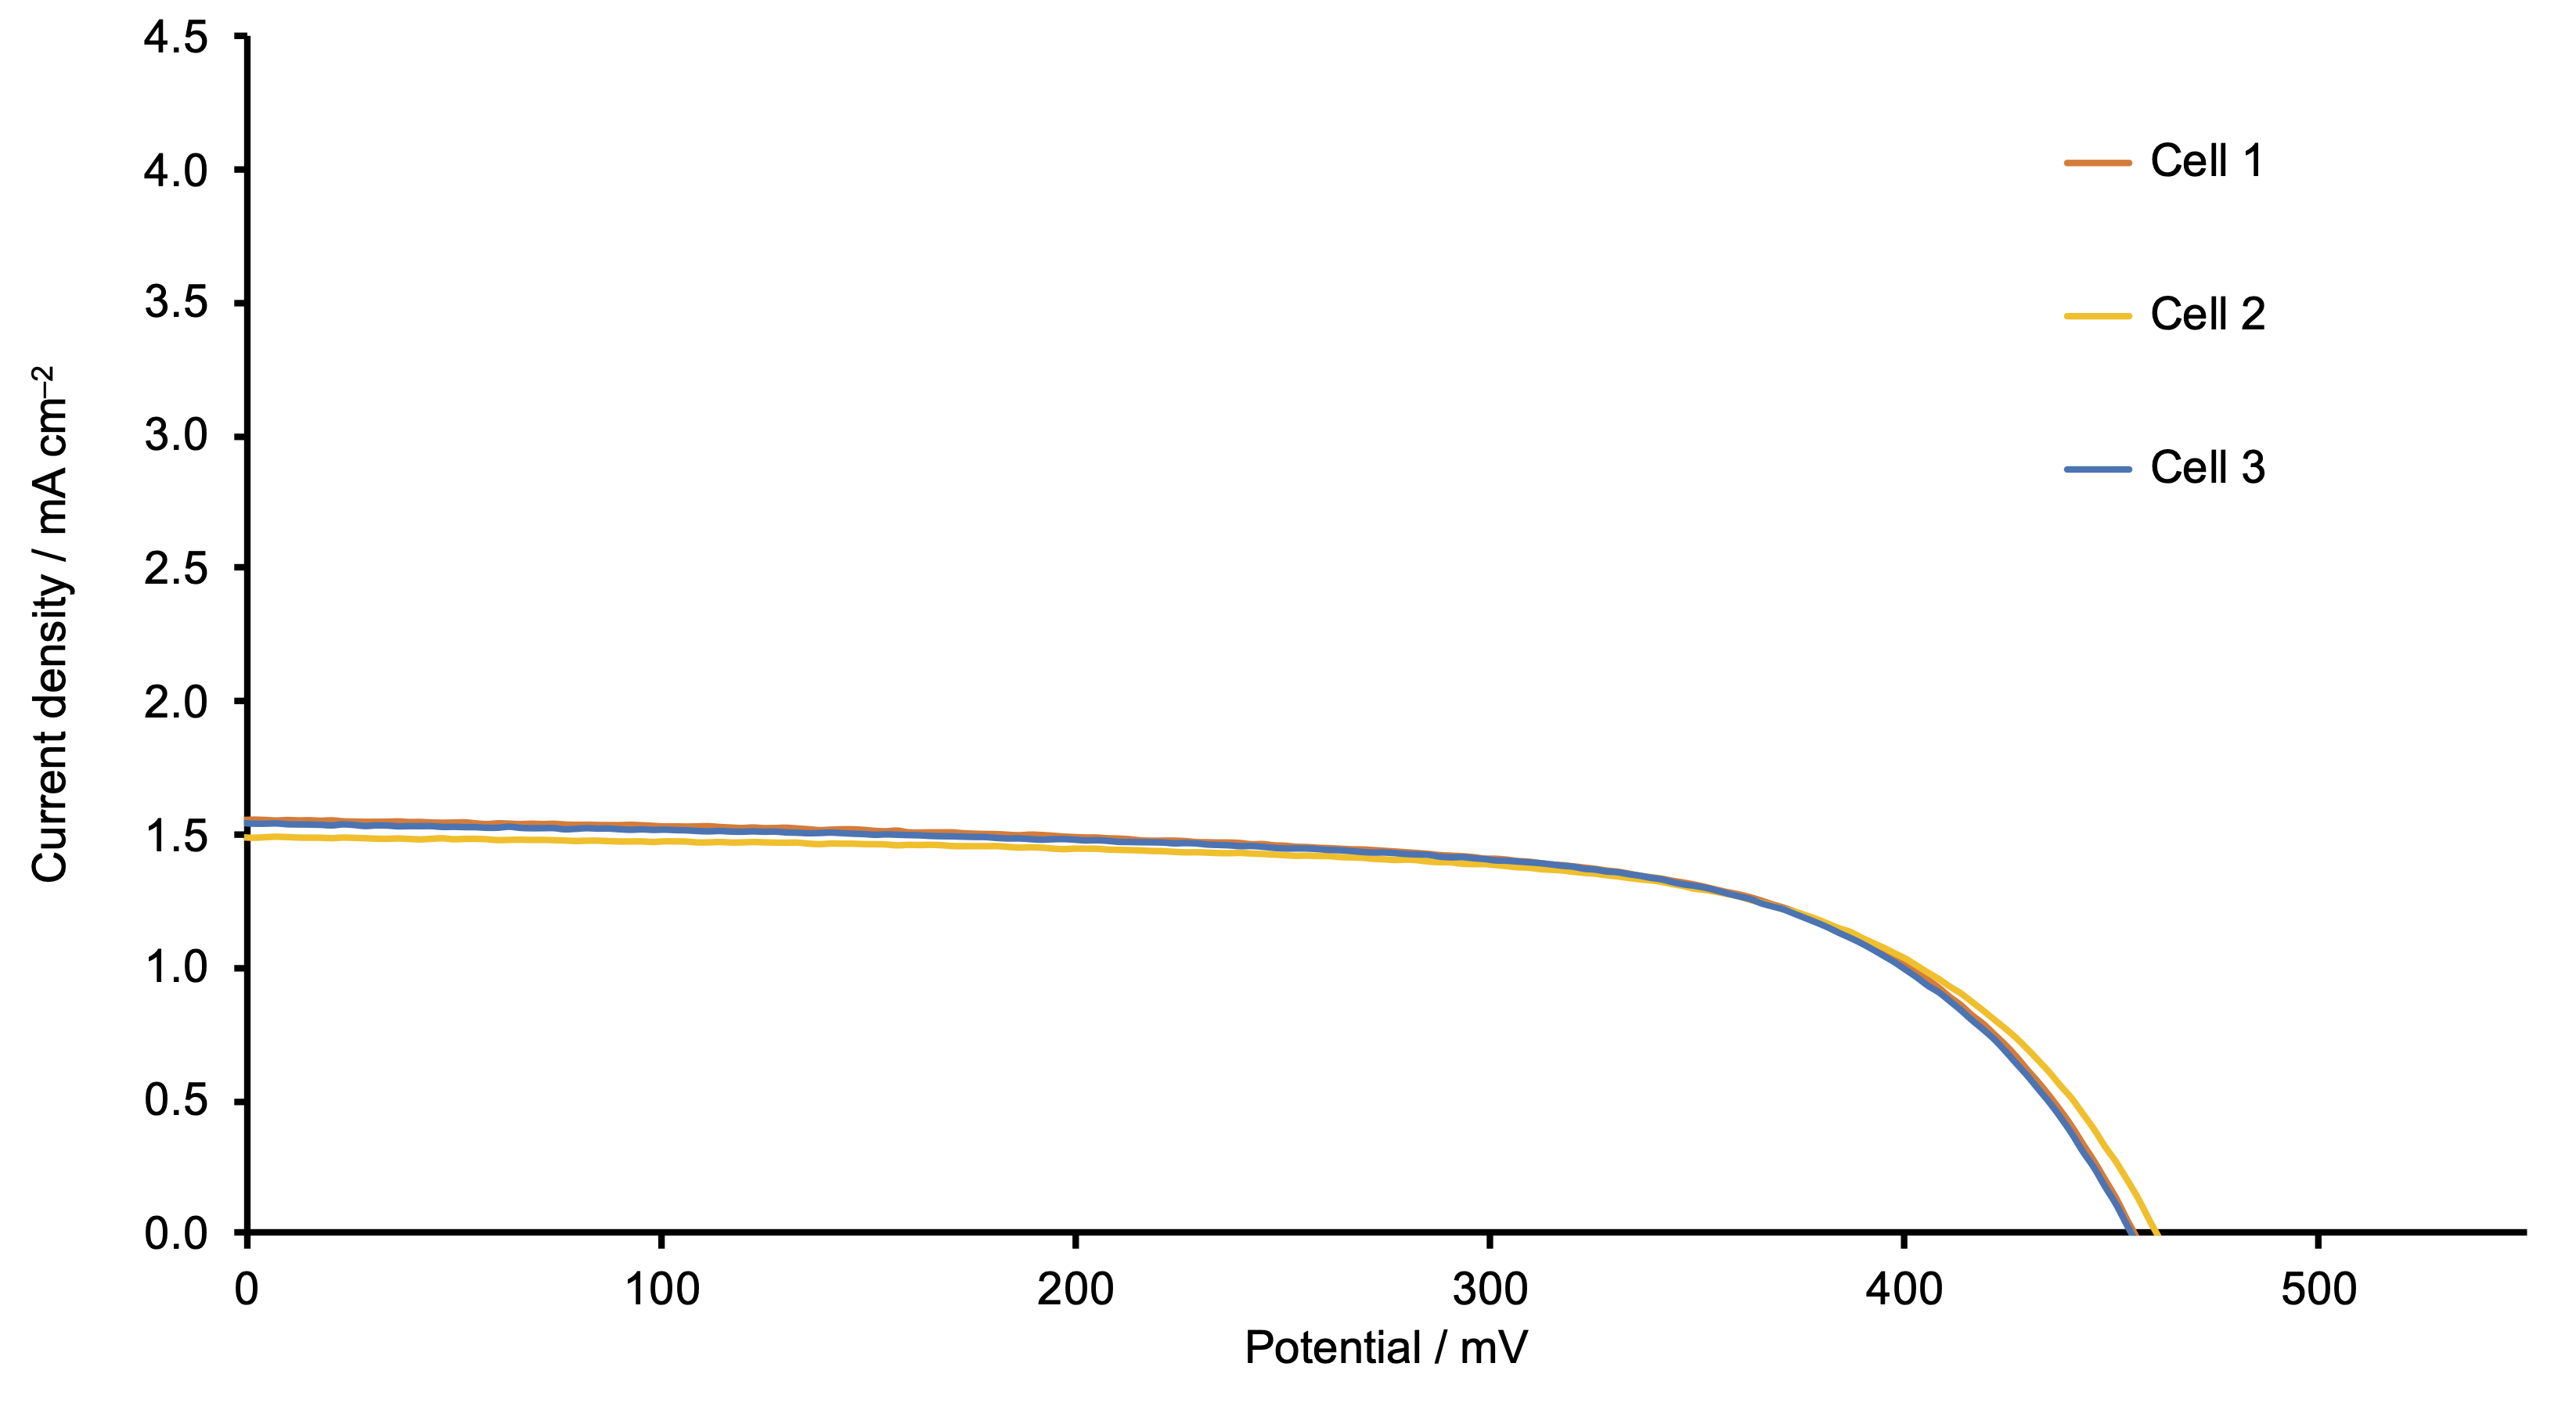


Figure S41. *J–V* curves for triplicate DSCs sensitized with [Cu(**6**)(**5**)]+. Measurements were made on the day of sealing the DSCs.


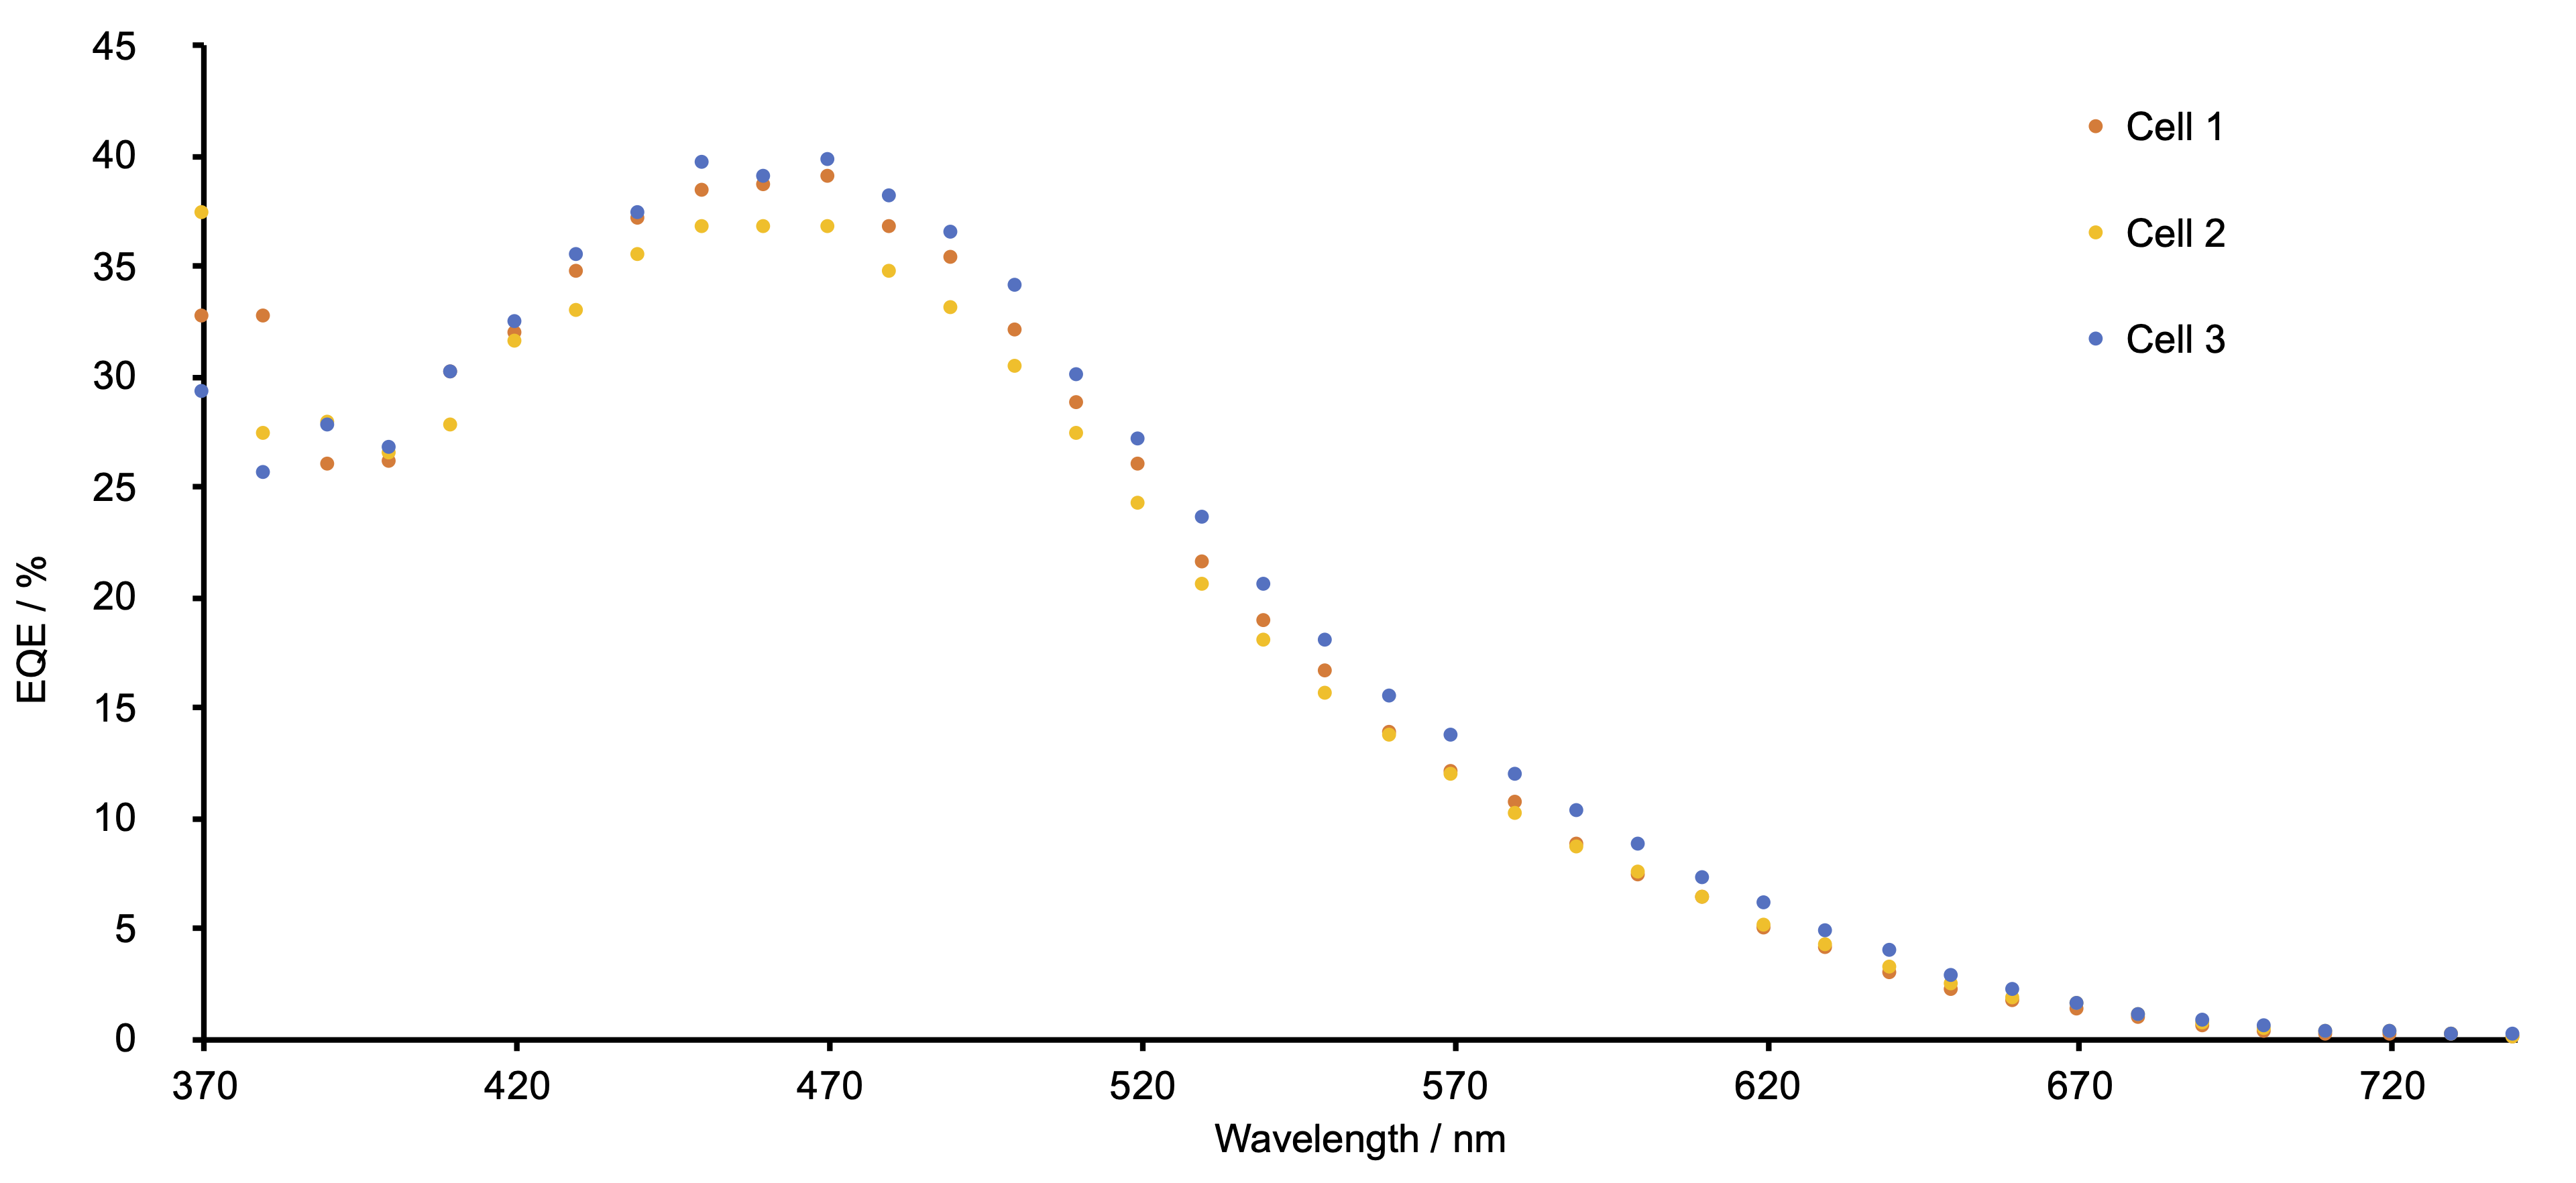


Figure S42. EQE spectra for triplicate DSCs sensitized with [Cu(**6**)(**1**)]+. Measurements were made on the day of sealing the DSCs.


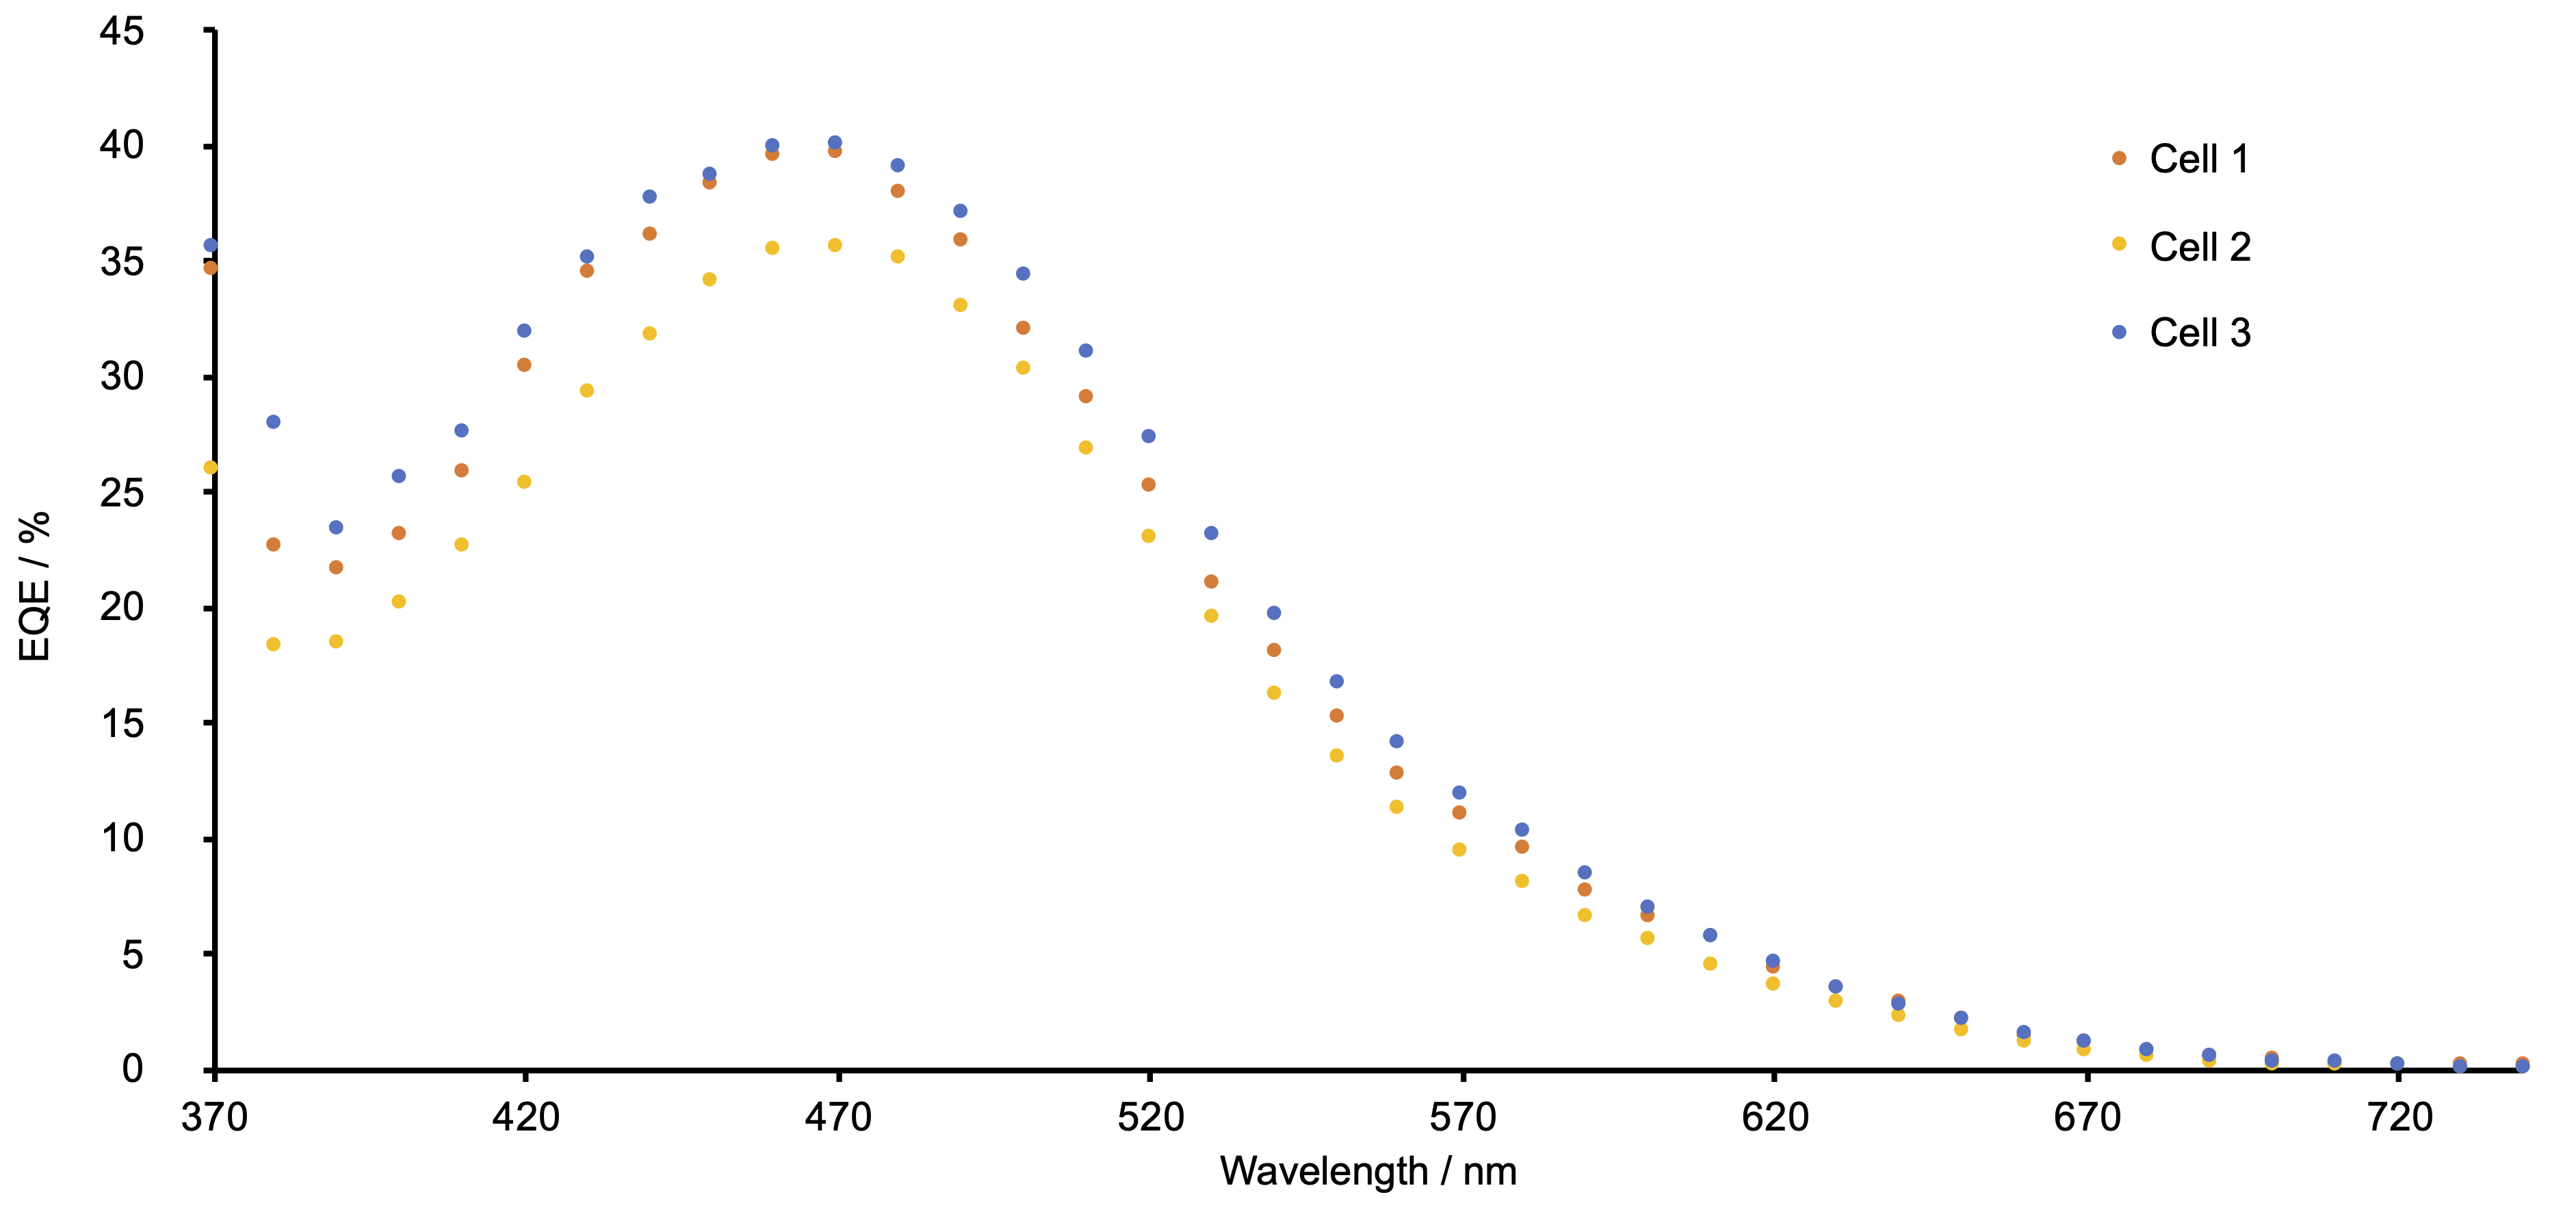


Figure S43. EQE spectra for triplicate DSCs sensitized with [Cu(**6**)(**2**)]+. Measurements were made on the day of sealing the DSCs.


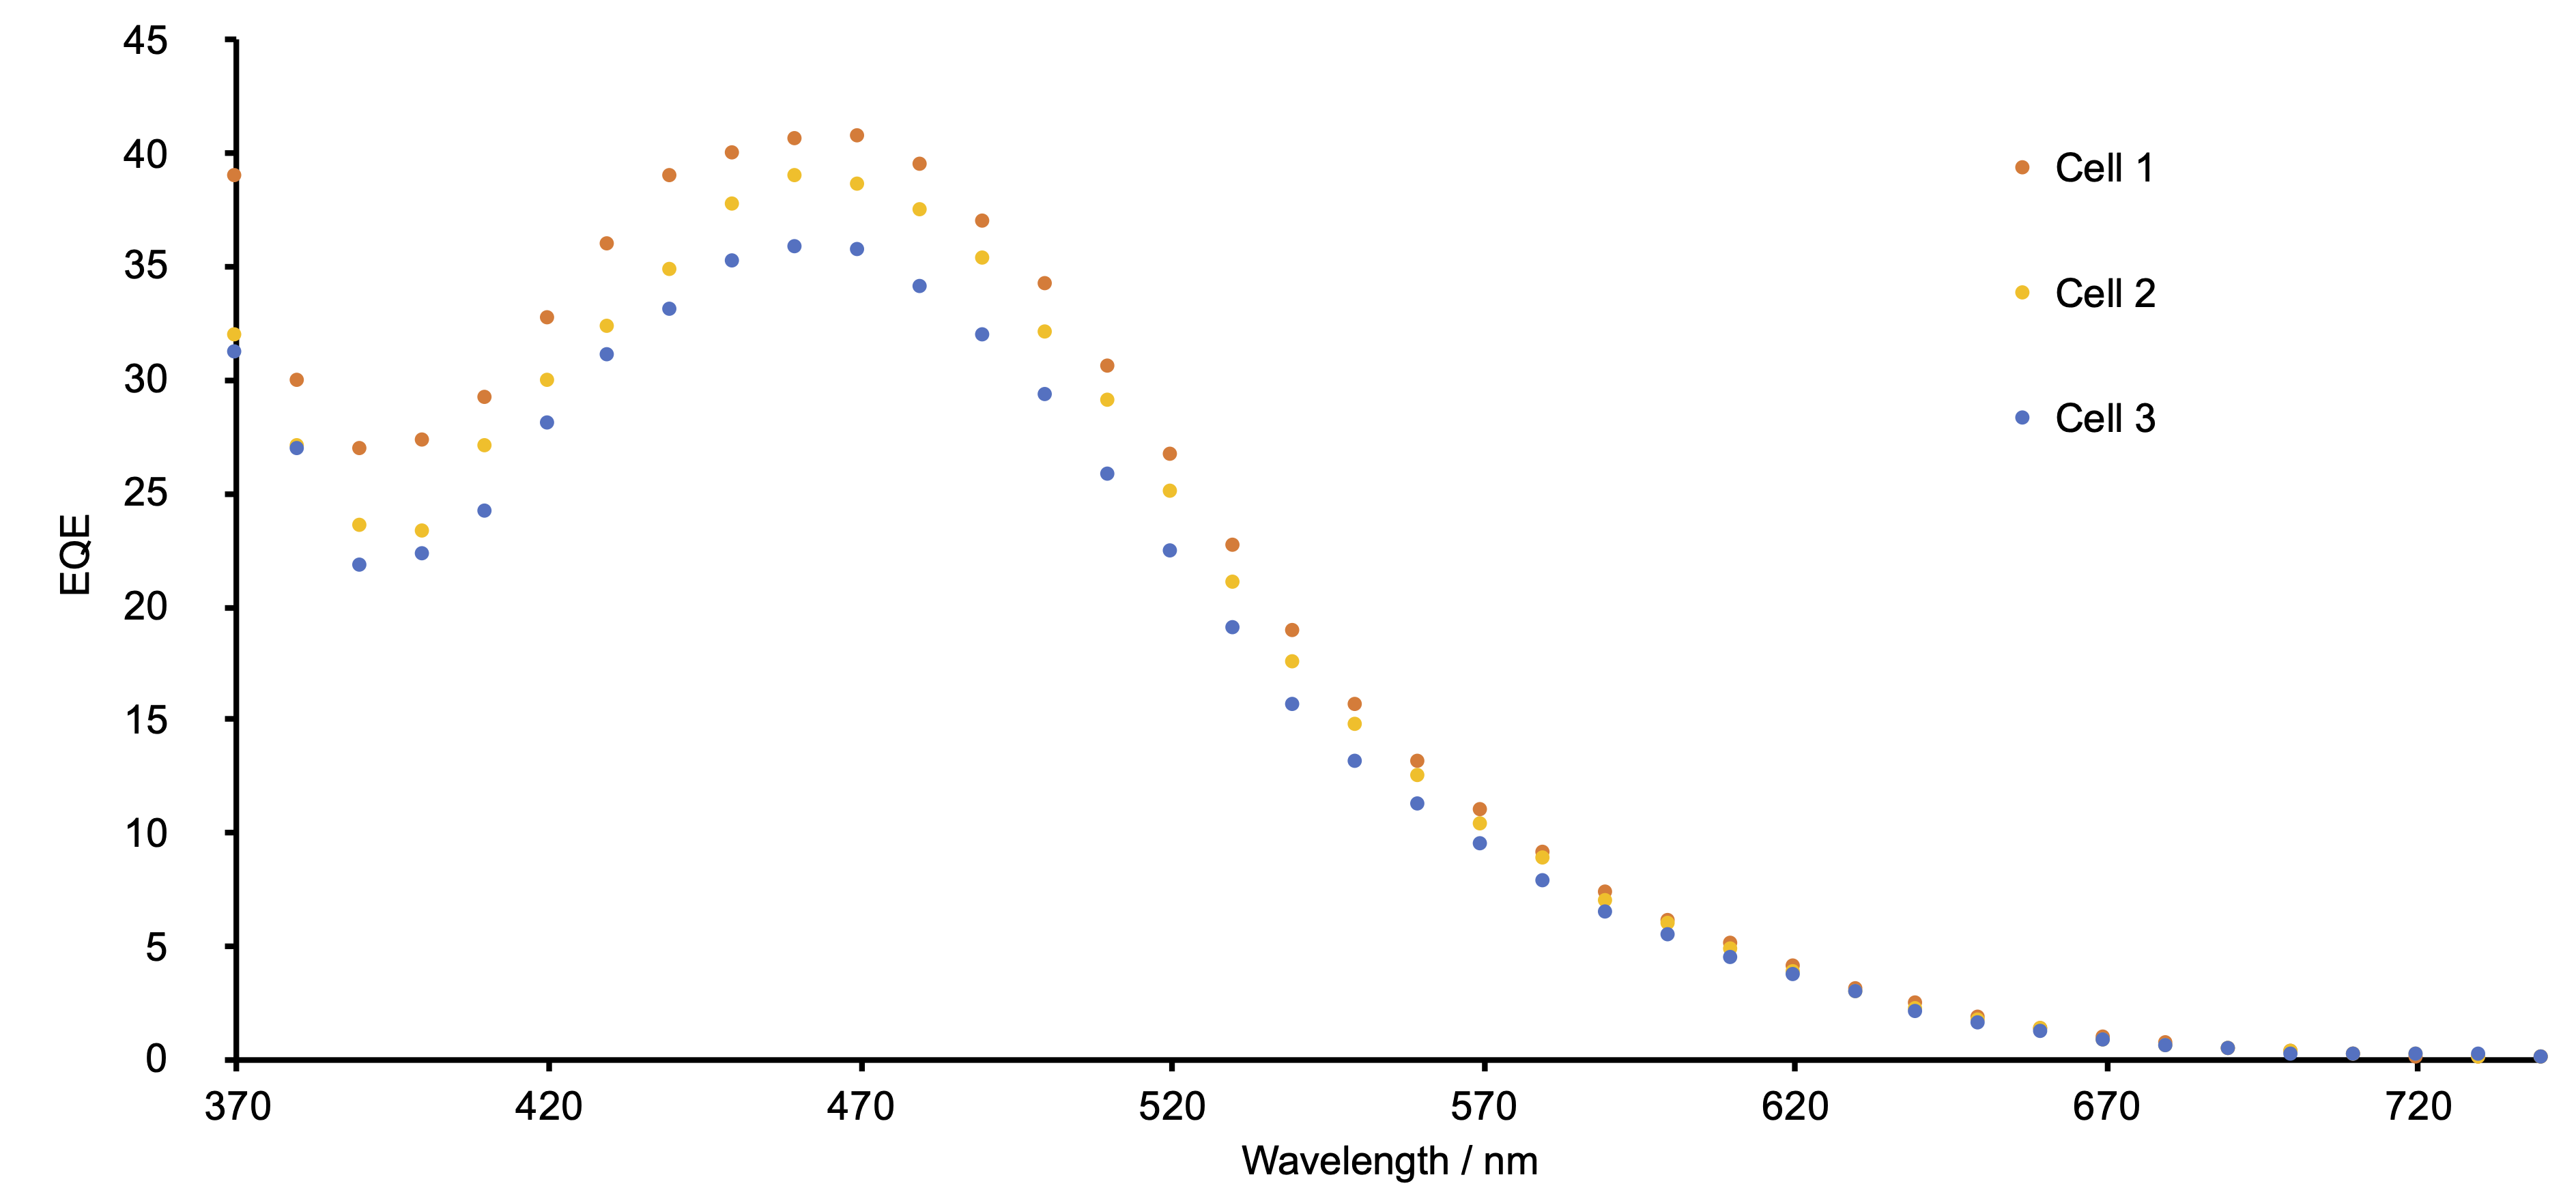


Figure S44. EQE spectra for triplicate DSCs sensitized with [Cu(**6**)(**3**)]+. Measurements were made on the day of sealing the DSCs.


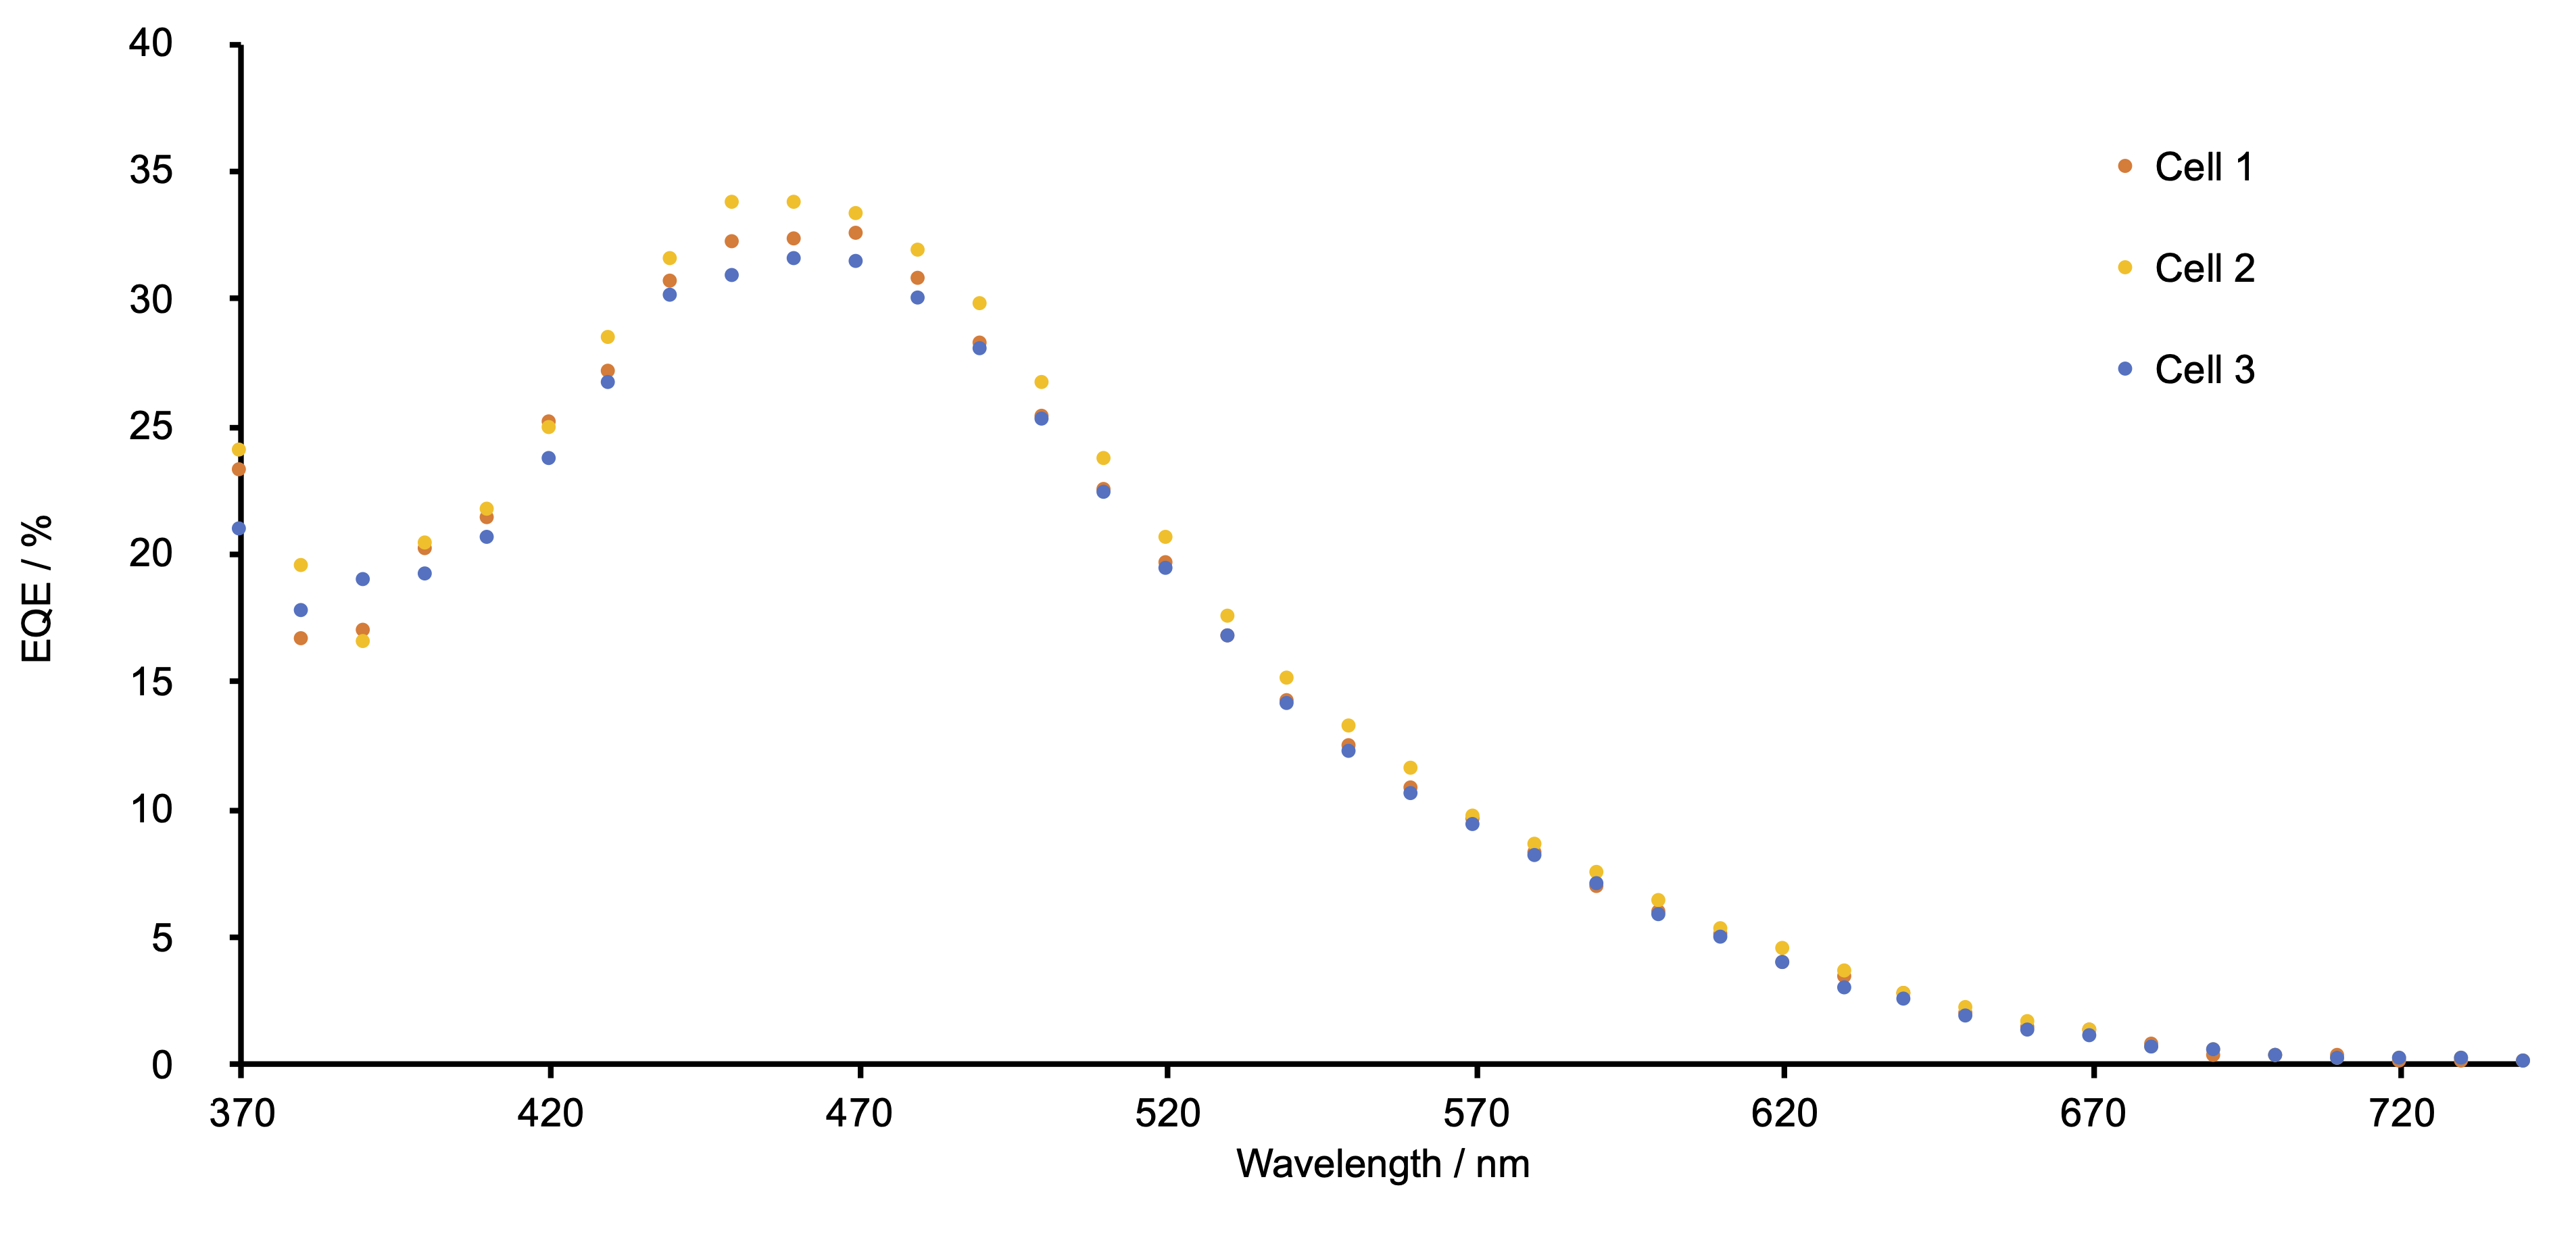


Figure S45. EQE spectra for triplicate DSCs sensitized with [Cu(**6**)(**4**)]+. Measurements were made on the day of sealing the DSCs.


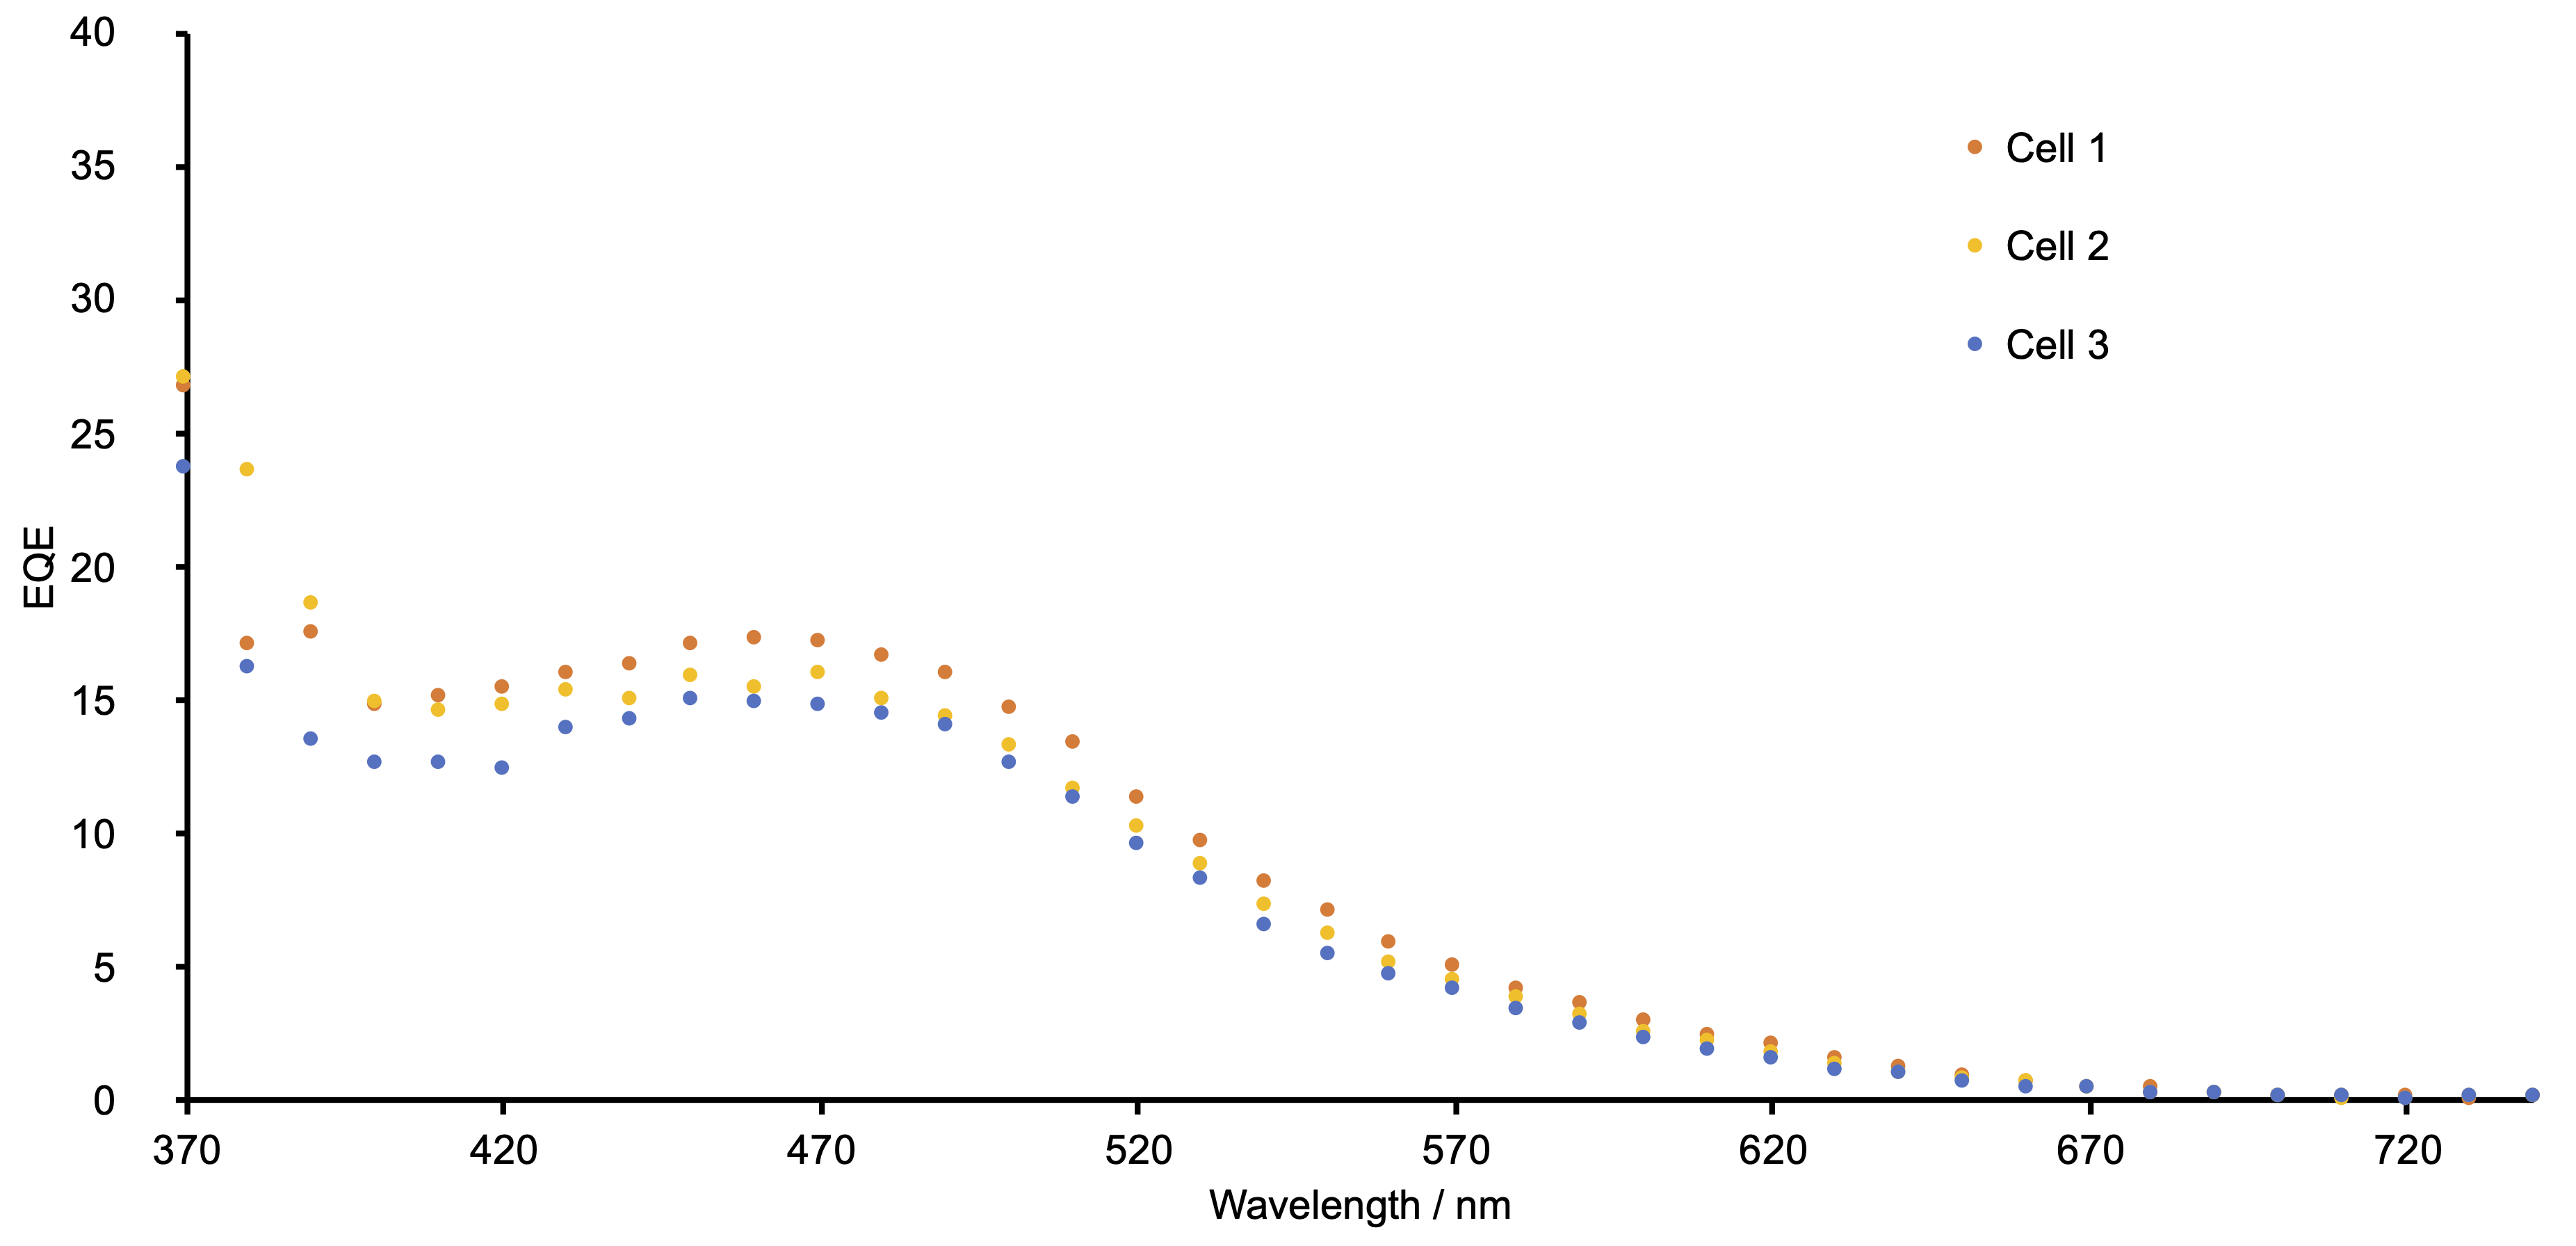


Figure S46. EQE spectra for triplicate DSCs sensitized with [Cu(**6**)(**5**)]+. Measurements were made on the day of sealing the DSCs.
